# Supplementary material for: China's Industrial Relocation Strengthens Bilateral Global Value Chain Linkages: Evidence from Multi-Country Sector-Level Analysis
Source: Research Square preprint supplement (doi:10.21203/rs.3.rs-7573857/v1), 2026-02-11
Supplement: Supplementary file 1 [file 47de34079e821f62af03e4a5.xlsx]

## Sheet: Sheet1
code	var2	country	var4	time	sec	exgr	exgr_fnl	exgr_int	posw	rca	develop	belit	农林牧渔	采矿业	制造业	低技术	中高技术	服务业	人均二氧化碳	人均GDP	人口密度	可再生能源占比	fdi	gdp	高等院校入学率1	gdp美元1	pergdp美元1	population1	固定资产总额1	商品贸易占GDP比列1	岁人口百分比1	研发投入占GDP比1	外商直接投资1	经济自由度1	制度质量1	互联网发展水平固定宽带订阅量	var39	RD研究人员每百万人	专利数非居民	专利数居民	工业增加值占比	农业增加值占比	矿石	燃料	gvcpt_f	gvcpt_b	plv	ply	var51
1	AUS	Australia	澳大利亚	1995	D01T02	183.8	100.7	83.1	0.980854	2.86254	1	.	1	.	.	.	.	.	16.117	20446.7	2.34368	1.32756	1.3e+10	3.7e+11	70.6886	3.7e+11	20319.6	1.8e+07	9.2e+10	31.1517	66.5726	1.74152	1.3e+10	74.1	1.6241	.	2.86254	.	12277	1784	26.4134	3.01021	20.2649	17.6094	0.172146	0.109748	2.26335	2.30753	0.980854
1	AUS	Australia	澳大利亚	1996	D01T02	629.4	346.7	282.6	0.981591	3.34911	1	.	1	.	.	.	.	.	16.5055	22020.1	2.37231	1.22903	4.6e+09	4.0e+11	75.6478	4.0e+11	21861.3	1.8e+07	9.7e+10	31.4082	66.5557	1.6665	4.6e+09	74	1.59927	.	3.34911	3355.86	13221	1797	25.9616	3.37948	18.8015	17.7444	0.193594	0.10969	2.30908	2.35238	0.981591
1	AUS	Australia	澳大利亚	1997	D01T02	626.2	359.7	266.5	0.953258	3.58243	1	.	1	.	.	.	.	.	16.7099	23645.1	2.39811	1.28387	8.1e+09	4.3e+11	80.9066	4.4e+11	23468.6	1.9e+07	1.1e+11	29.6391	66.5982	1.59147	8.1e+09	75.5	1.57443	.	3.58243	.	15398	1760	25.1982	3.22998	18.6811	18.5456	0.199493	0.116215	2.27921	2.39097	0.953258
1	AUS	Australia	澳大利亚	1998	D01T02	466.4	261.7	204.8	0.959498	3.27393	1	.	1	.	.	.	.	.	17.6605	21478.4	2.42214	1.17023	7.6e+09	4.0e+11	83.0013	4.0e+11	21319	1.9e+07	1.0e+11	30.2139	66.6764	1.51645	7.6e+09	75.6	1.5496	.	3.27393	3382.17	16063	1862	25.3625	3.02909	20.0663	17.9197	0.179855	0.11535	2.27071	2.36656	0.959498
1	AUS	Australia	澳大利亚	1999	D01T02	728.4	394.8	333.6	0.969083	3.60612	1	.	1	.	.	.	.	.	17.739	20698.7	2.44878	1.19751	2.2e+09	3.9e+11	85.096	3.9e+11	20533	1.9e+07	9.9e+10	32.2273	66.7482	1.54601	2.2e+09	76.4	1.60213	.	3.60612	.	17960	1858	24.6139	3.04995	20.9103	18.2538	0.185432	0.116927	2.28774	2.36073	0.969083
1	AUS	Australia	澳大利亚	2000	D01T02	836.7	432.2	404.6	0.990338	3.70053	1	.	1	.	.	.	.	.	17.8386	21853.4	2.47697	1.18308	1.5e+10	4.2e+11	87.1907	4.2e+11	21679.2	1.9e+07	1.1e+11	32.6088	66.7939	1.57558	1.5e+10	77.1	1.65466	.	3.70053	3475.33	20073	1928	24.5738	3.11284	19.6274	20.8947	0.186832	0.11202	2.30986	2.33239	0.990338
1	AUS	Australia	澳大利亚	2001	D01T02	794.7	417.2	377.5	1.02638	3.57737	1	.	1	.	.	.	.	.	17.9326	19681.6	2.50898	1.22916	1.1e+10	3.8e+11	89.2854	3.8e+11	19490.9	1.9e+07	8.8e+10	33.6372	66.9279	1.66359	1.1e+10	77.4	1.61035	0.637984	3.57737	.	20548	2187	23.6533	3.49967	19.3344	20.7633	0.181573	0.103846	2.35025	2.28984	1.02638
1	AUS	Australia	澳大利亚	2002	D01T02	1043.3	551.3	492	0.949791	3.65975	1	.	1	.	.	.	.	.	18.1261	20290.8	2.53768	1.21303	1.5e+10	3.9e+11	91.38	4.0e+11	20082.5	2.0e+07	9.6e+10	34.8976	67.0481	1.75161	1.5e+10	77.3	1.56604	1.32523	3.65975	3771.54	20181	2364	23.6226	3.94678	18.2468	20.6886	0.187463	0.116405	2.27054	2.39057	0.949791
1	AUS	Australia	澳大利亚	2003	D01T02	776.7	389.5	387.2	1.00922	3.00467	1	.	1	.	.	.	.	.	17.8787	23705.9	2.56704	1.2248	9.0e+09	4.7e+11	93.4747	4.7e+11	23447	2.0e+07	1.2e+11	34.1833	67.1532	1.80309	9.0e+09	77.4	1.59972	2.62348	3.00467	.	19176	2418	24.0526	2.88827	18.5658	19.7891	0.157994	0.104421	2.36758	2.34595	1.00922
1	AUS	Australia	澳大利亚	2004	D01T02	1179.2	497.9	681.3	1.02875	3.30368	1	.	1	.	.	.	.	.	18.3521	30820	2.59463	1.17975	4.3e+10	6.1e+11	95.5694	6.1e+11	30430.7	2.0e+07	1.6e+11	31.9922	67.2454	1.85456	4.3e+10	77.9	1.66846	5.07903	3.30368	4084.15	20274	2559	23.9462	3.06269	19.8157	20.2581	0.167841	0.093079	2.26301	2.19977	1.02875
1	AUS	Australia	澳大利亚	2005	D01T02	1584.1	587.1	997	1.01635	3.00648	1	.	1	.	.	.	.	.	18.3423	34460.5	2.62641	1.12979	-25000000000	6.9e+11	97.6641	6.9e+11	33999.2	2.0e+07	1.9e+11	33.3682	67.3141	2.02004	-25000000000	79	1.57154	9.99418	3.00648	.	21302	2555	24.6308	2.88693	23.0064	25.5954	0.169405	0.104401	2.27702	2.24039	1.01635
1	AUS	Australia	澳大利亚	2006	D01T02	1422.8	497.1	925.7	0.992016	2.51272	1	.	1	.	.	.	.	.	18.3605	36570.8	2.66209	1.17438	3.1e+10	7.5e+11	99.7588	7.5e+11	36044.9	2.1e+07	2.1e+11	35.2106	67.4831	2.18552	3.1e+10	79.9	1.56408	19.055	2.51272	4248.26	23166	2837	25.6315	2.73229	27.363	24.0426	0.169766	0.111513	2.27253	2.29082	0.992016
1	AUS	Australia	澳大利亚	2007	D01T02	1644.2	528.3	1115.9	1.00732	1.90794	1	.	1	.	.	.	.	.	18.5209	41023.8	2.71112	1.16903	4.4e+10	8.5e+11	101.853	8.5e+11	40960.1	2.1e+07	2.3e+11	35.9505	67.6175	2.29461	4.4e+10	81.1	1.59647	.	1.90794	.	24122	2718	25.6834	2.20696	29.0847	22.7535	0.143108	0.107824	2.29643	2.27975	1.00732
1	AUS	Australia	澳大利亚	2008	D01T02	1706.8	548.9	1157.9	1.04013	1.73905	1	.	1	.	.	.	.	.	18.3035	49681.2	2.76599	1.04822	4.5e+10	1.1e+12	103.948	1.1e+12	49601.7	2.1e+07	3.0e+11	36.7677	67.6837	2.4037	4.5e+10	82.2	1.61616	25.0143	1.73905	4343.13	23525	2821	25.6148	2.34261	27.8136	32.0402	0.156472	0.105071	2.3072	2.21818	1.04013
1	AUS	Australia	澳大利亚	2009	D01T02	1573.9	523.3	1050.5	1.08473	1.77821	1	.	1	.	.	.	.	.	18.2231	42810.5	2.82359	1.12028	2.9e+10	9.3e+11	106.043	9.3e+11	42772.4	2.2e+07	2.6e+11	34.4687	67.6715	2.38978	2.9e+10	82.6	1.59289	24.1033	1.77821	.	21187	2494	27.0478	2.30063	27.6965	29.507	0.162655	0.100594	2.32486	2.14326	1.08473
1	AUS	Australia	澳大利亚	2010	D01T02	2289.8	761.6	1528.2	1.05767	1.76806	1	.	1	.	.	.	.	.	17.5899	52132.5	2.86786	1.34025	3.5e+10	1.1e+12	108.137	1.2e+12	52022.1	2.2e+07	3.1e+11	36.1451	67.5911	2.37586	3.5e+10	82.6	1.59537	25.0237	1.76806	4532.4	22478	2409	25.1778	2.20427	33.9592	28.8807	0.152461	0.092467	2.27022	2.14645	1.05767
1	AUS	Australia	澳大利亚	2011	D01T02	3863.8	1207.7	2656.1	1.04146	1.8923	1	.	1	.	.	.	.	.	17.2952	62598.7	2.90799	1.67382	6.6e+10	1.4e+12	110.232	1.4e+12	62517.8	2.2e+07	3.6e+11	36.905	67.3338	2.23765	6.6e+10	82.5	1.62187	24.8333	1.8923	.	23143	2383	26.5225	2.29166	36.6251	28.1411	0.172798	0.100257	2.25732	2.16746	1.04146
1	AUS	Australia	澳大利亚	2012	D01T02	4773.9	1474.9	3299	1.07794	2.20515	1	.	1	.	.	.	.	.	17.0219	68047.4	2.9592	1.72074	5.8e+10	1.5e+12	112.327	1.6e+12	68012.1	2.3e+07	4.2e+11	33.4776	67.0838	2.20817	5.8e+10	83.1	1.60964	25.2318	2.20515	.	23731	2627	26.3845	2.26753	34.1294	28.4455	0.189898	0.100974	2.32663	2.15841	1.07794
1	AUS	Australia	澳大利亚	2013	D01T02	6092.1	1686.2	4405.9	1.06456	2.51089	1	.	1	.	.	.	.	.	16.4422	68156.4	3.01057	2.13883	5.4e+10	1.6e+12	114.422	1.6e+12	68150.1	2.3e+07	4.4e+11	31.4126	66.8268	2.1787	5.4e+10	82.6	1.5787	25.8786	2.51089	.	26656	3061	25.1974	2.28565	38.2226	25.8653	0.207586	0.105814	2.31646	2.17598	1.06456
1	AUS	Australia	澳大利亚	2014	D01T02	5271.6	1400.4	3871.2	1.10692	2.31541	1	.	1	.	.	.	.	.	15.8306	62515.3	3.05581	2.37342	6.3e+10	1.5e+12	116.516	1.5e+12	62510.8	2.3e+07	4.0e+11	32.5269	66.5514	2.04894	6.3e+10	82	1.60688	27.8488	2.31541	.	23968	1988	25.5787	2.22088	37.0262	26.5991	0.193857	0.100652	2.35709	2.12941	1.10692
1	AUS	Australia	澳大利亚	2015	D01T02	4834.9	1175.7	3659.2	1.13433	2.31938	1	.	1	.	.	.	.	.	15.8631	56709	3.10011	2.15439	4.7e+10	1.4e+12	118.611	1.4e+12	56755.7	2.4e+07	3.5e+11	29.3103	66.258	1.91918	4.7e+10	81.4	1.55019	28.6647	2.31938	.	26314	2291	23.6935	2.37596	32.1805	25.2908	0.196345	0.099965	2.44492	2.15538	1.13433
1	AUS	Australia	澳大利亚	2016	D01T02	4417.1	1135.2	3281.9	1.14709	2.34694	1	.	1	.	.	.	.	.	15.9147	49876.7	3.14494	.	4.3e+10	1.2e+12	120.966	1.2e+12	49971.1	2.4e+07	3.1e+11	32.1608	65.9066	1.89692	4.3e+10	80.3	1.57268	30.4765	2.34694	.	25774	2620	22.3299	2.40453	31.5277	25.5971	0.196709	0.092477	2.41676	2.10686	1.14709
1	AUS	Australia	澳大利亚	2017	D01T02	5186.3	1373.5	3812.8	1.12413	2.38442	1	.	1	.	.	.	.	.	15.8234	53934.2	3.19737	.	4.8e+10	1.3e+12	113.142	1.3e+12	54028	2.5e+07	3.2e+11	34.6009	65.5309	1.87466	4.7e+10	81	1.53612	32.2159	2.38442	.	26403	2503	23.4735	2.70322	31.3992	30.3162	0.21215	0.094792	2.39257	2.12838	1.12413
1	AUS	Australia	澳大利亚	2018	D01T02	4298.2	1204.6	3093.6	1.06926	1.68419	1	.	1	.	.	.	.	.	15.5034	57207	3.24578	.	6.1e+10	1.4e+12	107.808	1.4e+12	57355	2.5e+07	3.5e+11	34.3702	65.1529	1.8524	6.2e+10	80.9	1.57533	33.7373	1.68419	.	27200	2757	24.144	2.45811	29.7318	35.5353	0.176813	0.111956	2.41526	2.25881	1.06926
2	AUT	Austria	奥地利	1995	D01T02	2	2	0.1	1.0652	0.403849	1	.	1	.	.	.	.	.	7.69726	30325.8	96.3194	10.3378	1.8e+09	2.4e+11	44.977	2.4e+11	30325.8	7.9e+06	6.1e+10	51.4337	67.0928	1.50663	1.8e+09	70	1.66078	.	0.403849	.	458	1728	28.8515	2.1586	3.3149	1.00207	0.100562	0.164295	2.05703	1.93112	1.0652
2	AUT	Austria	奥地利	1996	D01T02	1.5	1.4	0.1	1.06705	0.404165	1	.	1	.	.	.	.	.	8.15425	29809.1	96.4496	9.60067	4.3e+09	2.4e+11	47.4906	2.4e+11	29809.1	8.0e+06	6.1e+10	53.4147	67.0603	1.58077	4.3e+09	68.9	1.63169	.	0.404165	.	449	1909	28.752	1.98247	3.20418	1.22888	0.102967	0.169838	2.08855	1.95731	1.06705
2	AUT	Austria	奥地利	1997	D01T02	1.5	1.4	0.2	1.06985	0.410692	1	.	1	.	.	.	.	.	8.05942	26705.5	96.5589	9.96567	2.7e+09	2.1e+11	49.567	2.1e+11	26705.5	8.0e+06	5.4e+10	58.989	67.188	1.65491	2.7e+09	65.2	1.60259	.	0.410692	.	397	1910	28.6764	1.90548	2.63056	1.23907	0.113678	0.177994	2.13118	1.99203	1.06985
2	AUT	Austria	奥地利	1998	D01T02	1.5	1.3	0.2	1.09199	0.418873	1	.	1	.	.	.	.	.	8.10726	27361.9	96.6649	10.2241	4.6e+09	2.2e+11	52.3963	2.2e+11	27361.9	8.0e+06	5.6e+10	61.2064	67.4179	1.73155	4.6e+09	65.4	1.5735	.	0.418873	2327.41	349	1957	28.5107	1.79334	2.51796	1.0277	0.129453	0.180136	2.16238	1.98023	1.09199
2	AUT	Austria	奥地利	1999	D01T02	2	1.5	0.5	1.08887	0.458139	1	.	1	.	.	.	.	.	7.88906	27183.5	96.8532	10.7521	3.0e+09	2.2e+11	53.5797	2.2e+11	27174.3	8.0e+06	5.4e+10	63.2555	67.6389	1.84537	3.0e+09	64	1.55815	0.636937	0.458139	.	341	2028	28.4286	1.72222	2.22552	1.17797	0.137613	0.180422	2.15357	1.9778	1.08887
2	AUT	Austria	奥地利	2000	D01T02	2.4	1.6	0.8	0.997793	0.448142	1	.	1	.	.	.	.	.	7.93007	24625.6	97.0864	11.2558	8.5e+09	2.0e+11	54.7632	2.0e+11	24564.5	8.0e+06	5.0e+10	71.1911	67.7829	1.88602	8.5e+09	68.4	1.54281	2.37815	0.448142	.	340	1961	28.2848	1.6473	2.53428	1.26073	0.11952	0.188138	1.97521	1.97958	0.997793
2	AUT	Austria	奥地利	2001	D01T02	3	1.9	1.1	0.975402	0.422684	1	.	1	.	.	.	.	.	8.44427	24558.8	97.4587	10.5385	5.7e+09	2.0e+11	55.9466	2.0e+11	24537.5	8.0e+06	4.9e+10	73.6726	67.8769	1.9921	5.7e+09	68.1	1.60943	3.98775	0.422684	.	284	1815	28.2087	1.6707	2.41501	1.85573	0.109755	0.191859	1.93597	1.9848	0.975402
2	AUT	Austria	奥地利	2002	D01T02	2.4	1.8	0.6	0.923789	0.404795	1	.	1	.	.	.	.	.	8.58306	26527.6	97.9394	10.5101	1.4e+08	2.1e+11	57.1301	2.1e+11	26401.7	8.1e+06	5.0e+10	73.5653	67.9005	2.06598	1.4e+08	67.4	1.67606	5.58238	0.404795	2965.68	329	1932	27.3881	1.56277	2.24139	2.24907	0.102565	0.197358	1.86106	2.0146	0.923789
2	AUT	Austria	奥地利	2003	D01T02	2.7	2.3	0.4	0.976276	0.41576	1	.	1	.	.	.	.	.	9.16854	32294	98.4176	9.01178	6.2e+09	2.6e+11	58.3135	2.6e+11	32222.9	8.1e+06	6.3e+10	75.1552	67.8735	2.17456	6.2e+09	67.6	1.62997	7.40138	0.41576	.	213	2120	27.4984	1.49193	2.51799	2.54891	0.123339	0.190084	1.99317	2.04161	0.976276
2	AUT	Austria	奥地利	2004	D01T02	2.4	1.8	0.6	0.991402	0.412508	1	.	1	.	.	.	.	.	9.2751	36889.2	99.0301	9.57511	3.2e+09	3.0e+11	59.497	3.0e+11	36821.5	8.2e+06	7.1e+10	79.1883	67.8432	2.16612	3.2e+09	67.6	1.64039	10.6471	0.412508	3158.79	266	2248	27.3738	1.47647	2.60322	3.17657	0.125166	0.181509	2.00146	2.01882	0.991402
2	AUT	Austria	奥地利	2005	D01T02	2.5	1.5	0.9	0.982442	0.407959	1	.	1	.	.	.	.	.	9.2657	38417.5	99.7071	9.35971	8.1e+10	3.2e+11	60.6804	3.2e+11	38403.1	8.2e+06	7.3e+10	79.9144	67.8309	2.37324	8.1e+10	68.8	1.59266	14.27	0.407959	3449.33	235	2270	27.0742	1.2594	2.70397	4.60333	0.140445	0.193486	2.05524	2.09197	0.982442
2	AUT	Austria	奥地利	2006	D01T02	2.3	1.4	0.9	1.005	0.378933	1	.	1	.	.	.	.	.	8.96148	40669.3	100.202	9.91004	1.1e+10	3.4e+11	61.8638	3.4e+11	40635.3	8.3e+06	7.6e+10	81.537	67.7483	2.35923	1.1e+10	71.1	1.62538	17.3203	0.378933	3524.14	378	2271	27.2594	1.30319	3.27476	5.26819	0.145612	0.194077	2.1034	2.09293	1.005
2	AUT	Austria	奥地利	2007	D01T02	3.9	1.7	2.1	1.07862	0.389555	1	.	1	.	.	.	.	.	8.5881	46915.3	100.527	10.5604	6.9e+10	3.9e+11	63.0473	3.9e+11	46855.8	8.3e+06	8.9e+10	84.0402	67.6808	2.41843	6.9e+10	71.6	1.69779	19.5546	0.389555	3810.03	287	2385	27.5726	1.41639	3.35847	2.66456	0.16949	0.182405	2.23372	2.0709	1.07862
2	AUT	Austria	奥地利	2008	D01T02	4	2.2	1.8	1.05931	0.399351	1	.	1	.	.	.	.	.	8.49964	51920	100.842	10.5185	6.3e+09	4.3e+11	65.8869	4.3e+11	51708.8	8.3e+06	1.0e+11	84.9609	67.623	2.56945	6.3e+09	71.4	1.64181	20.7784	0.399351	4136.93	329	2298	26.9602	1.34222	3.37659	3.35651	0.176832	0.193224	2.26851	2.14149	1.05931
2	AUT	Austria	奥地利	2009	D01T02	3.9	2.5	1.4	1.00579	0.401165	1	.	1	.	.	.	.	.	7.7207	48153.3	101.107	10.9742	1.4e+10	4.0e+11	68.1126	4.0e+11	47963.2	8.3e+06	9.0e+10	69.9829	67.5603	2.59674	1.4e+10	71.2	1.53175	22.5163	0.401165	4140.1	292	2263	25.7928	1.14682	3.07543	3.44074	0.160477	0.189963	2.19403	2.18141	1.00579
2	AUT	Austria	奥地利	2010	D01T02	5.3	3.9	1.4	1.03044	0.441338	1	.	1	.	.	.	.	.	8.36502	46903.8	101.35	10.0556	-22000000000	3.9e+11	75.6238	3.9e+11	46858	8.4e+06	8.5e+10	79.5036	67.485	2.7261	-22000000000	71.6	1.54388	24.518	0.441338	4349.72	249	2424	25.535	1.26733	3.83863	3.21014	0.192056	0.214773	2.23127	2.16536	1.03044
2	AUT	Austria	奥地利	2011	D01T02	7.1	4.6	2.5	1.10158	0.436774	1	.	1	.	.	.	.	.	8.13565	51442.3	101.692	10.207	2.3e+10	4.3e+11	78.4995	4.3e+11	51375	8.4e+06	9.7e+10	85.555	67.4249	2.66868	2.3e+10	71.9	1.47164	24.9988	0.436774	4390.35	276	2154	25.4474	1.40191	3.82212	3.37635	0.21449	0.215232	2.37593	2.15683	1.10158
2	AUT	Austria	奥地利	2012	D01T02	8.8	6.5	2.2	1.06541	0.44761	1	.	1	.	.	.	.	.	7.72327	48564.9	102.157	11.9573	5.2e+09	4.1e+11	78.9389	4.1e+11	48567.7	8.4e+06	9.3e+10	84.2948	67.3589	2.91472	5.2e+09	70.3	1.52289	25.2704	0.44761	4669.45	294	2258	25.634	1.34855	3.72523	3.66211	0.209054	0.224664	2.31996	2.17753	1.06541
2	AUT	Austria	奥地利	2013	D01T02	11	8	3	1.04398	0.400574	1	.	1	.	.	.	.	.	7.75335	50731.1	102.761	12.2987	4.5e+08	4.3e+11	79.6554	4.3e+11	50716.7	8.5e+06	9.9e+10	83.3432	67.2728	2.95492	4.5e+08	71.8	1.55033	26.3281	0.400574	4724.72	244	2162	25.5249	1.25472	3.23948	2.70144	0.206426	0.234405	2.31429	2.2168	1.04398
2	AUT	Austria	奥地利	2014	D01T02	19.1	15.2	3.9	0.997334	0.373633	1	.	1	.	.	.	.	.	7.26028	51786.4	103.567	13.2072	1.7e+09	4.4e+11	79.1587	4.4e+11	51717.5	8.5e+06	1.0e+11	81.5163	67.1662	3.08429	1.7e+09	72.4	1.52492	27.6033	0.373633	4947.88	271	2092	25.3646	1.20074	3.07966	2.39395	0.190967	0.231689	2.19435	2.20022	0.997334
2	AUT	Austria	奥地利	2015	D01T02	21.8	17.4	4.4	1.02589	0.407343	1	.	1	.	.	.	.	.	7.31696	44195.8	104.735	12.2129	-8000000000	3.8e+11	80.7194	3.8e+11	44178	8.6e+06	8.7e+10	80.8695	67.0395	3.04969	-8000000000	71.2	1.46392	28.4122	0.407343	5019.44	236	2205	25.1749	1.12979	3.27016	1.96119	0.206393	0.229904	2.24992	2.19314	1.02589
2	AUT	Austria	奥地利	2016	D01T02	21.2	16.2	5	1.02721	0.389854	1	.	1	.	.	.	.	.	7.28934	45307.6	105.873	.	-29000000000	4.0e+11	83.4549	4.0e+11	45276.8	8.7e+06	9.1e+10	78.3143	66.9202	3.11659	-29000000000	71.7	1.42715	28.8823	0.389854	5372.24	237	2078	25.4768	1.11032	3.14266	1.69167	0.199905	0.221468	2.19827	2.14005	1.02721
2	AUT	Austria	奥地利	2017	D01T02	22.6	17.6	4.9	1.07147	0.37941	1	.	1	.	.	.	.	.	7.48574	47429.2	106.611	.	1.4e+10	4.2e+11	85.0571	4.2e+11	47309.4	8.8e+06	9.8e+10	82.5985	66.8125	3.04885	1.4e+10	72.3	1.43775	28.5468	0.37941	5387.93	232	2073	25.4119	1.21054	3.39543	1.89855	0.205789	0.213739	2.24413	2.09445	1.07147
2	AUT	Austria	奥地利	2018	D01T02	25.8	20	5.7	1.06061	0.391706	1	.	1	.	.	.	.	.	7.13328	51466.6	107.132	.	-29000000000	4.5e+11	86.6883	4.6e+11	51453.1	8.8e+06	1.1e+11	83.2182	66.7005	3.17491	-29000000000	71.8	1.46139	28.5187	0.391706	5639.06	168	2039	25.3664	1.1306	3.13159	2.09499	0.214586	0.221168	2.25009	2.1215	1.06061
3	BEL	Belgium	比利时	1995	D01T02	0.6	0.3	0.3	0.960846	0.313624	1	.	1	.	.	.	.	.	11.3022	28413.8	308.861	20.2856	1.1e+10	2.9e+11	53.4344	2.9e+11	28413.8	1.0e+07	6.1e+10	46.5817	66.1818	1.67627	1.1e+10	67.4	1.4377	.	0.313624	.	355	732	26.0458	1.30662	.	.	0.180406	0.269007	2.23982	2.33109	0.960846
3	BEL	Belgium	比利时	1996	D01T02	0.7	0.4	0.3	0.971308	0.319515	1	.	1	.	.	.	.	.	11.7606	27489.6	309.465	20.1725	1.4e+10	2.8e+11	55.447	2.8e+11	27489.6	1.0e+07	5.9e+10	68.2455	65.9813	1.74299	1.4e+10	66	1.39574	.	0.319515	2461.7	310	776	25.8109	1.32831	.	.	0.185216	0.269434	2.2527	2.31925	0.971308
3	BEL	Belgium	比利时	1997	D01T02	1.5	0.9	0.7	0.95347	0.297364	1	.	1	.	.	.	.	.	11.4558	24820.9	310.215	22.0674	1.2e+10	2.5e+11	56.007	2.5e+11	24820.9	1.0e+07	5.5e+10	89.9092	65.8344	1.80971	1.2e+10	64.6	1.35378	.	0.297364	2568.8	269	792	26.1099	1.34082	.	.	0.183561	0.269162	2.19229	2.29927	0.95347
3	BEL	Belgium	比利时	1998	D01T02	1.5	0.7	0.8	0.976635	0.313321	1	.	1	.	.	.	.	.	11.7037	25338.4	310.878	21.1564	2.3e+10	2.6e+11	56.5671	2.6e+11	25338.4	1.0e+07	5.6e+10	111.573	65.7302	1.83825	2.3e+10	64.7	1.31181	0.107219	0.313321	2695.24	249	690	25.5707	1.25568	.	.	0.190824	0.26588	2.23948	2.29305	0.976635
3	BEL	Belgium	比利时	1999	D01T02	4.9	2.3	2.6	0.933898	0.326273	1	.	1	.	.	.	.	.	11.2957	25252.8	311.591	22.3613	1.2e+11	2.6e+11	57.1272	2.6e+11	25244.3	1.0e+07	5.7e+10	133.237	65.6459	1.90565	1.2e+11	62.9	1.34529	0.224956	0.326273	2899.18	249	591	24.7258	1.07624	2.70493	2.90468	0.192476	0.273097	2.17412	2.328	0.933898
3	BEL	Belgium	比利时	2000	D01T02	4.3	1.6	2.7	0.988451	0.322691	1	.	1	.	.	.	.	.	11.44	23098.9	338.549	21.7391	8.9e+10	2.4e+11	58.1691	2.4e+11	23041.5	1.0e+07	5.3e+10	154.9	65.5677	1.93619	8.9e+10	63.5	1.37876	1.40501	0.322691	2970.19	243	577	24.9438	1.17601	2.79025	4.57326	0.205633	0.279863	2.27828	2.3049	0.988451
3	BEL	Belgium	比利时	2001	D01T02	4.1	1.7	2.4	0.966108	0.295716	1	.	1	.	.	.	.	.	11.5043	23015.1	339.715	21.0188	8.8e+10	2.4e+11	58.8563	2.4e+11	22995.2	1.0e+07	5.3e+10	156.004	65.5524	2.03279	8.8e+10	63.8	1.42208	4.46212	0.295716	3123.99	264	571	24.3122	1.10935	2.59095	4.01544	0.19525	0.280797	2.29382	2.37429	0.966108
3	BEL	Belgium	比利时	2002	D01T02	3.7	1.6	2.1	0.945969	0.334951	1	.	1	.	.	.	.	.	10.728	25006.2	341.241	22.3336	1.8e+10	2.6e+11	59.3828	2.6e+11	24887.6	1.0e+07	5.3e+10	161.161	65.5292	1.90325	1.8e+10	67.6	1.4654	7.8742	0.334951	2958.84	147	601	23.7873	1.03313	2.25101	4.34669	0.201286	0.280606	2.24402	2.3722	0.945969
3	BEL	Belgium	比利时	2003	D01T02	8.3	3.8	4.5	0.930763	0.361738	1	.	1	.	.	.	.	.	11.1315	30655.2	342.673	21.453	3.5e+10	3.2e+11	59.8345	3.2e+11	30587.7	1.0e+07	6.5e+10	154.565	65.5083	1.84119	3.5e+10	68.1	1.39516	11.9483	0.361738	2967.37	188	519	23.2267	1.02944	2.11991	5.34846	0.193637	0.276533	2.18298	2.34537	0.930763
3	BEL	Belgium	比利时	2004	D01T02	9.3	2.9	6.4	0.927723	0.39664	1	.	1	.	.	.	.	.	10.9415	35429.4	344.159	21.343	4.4e+10	3.7e+11	61.0229	3.7e+11	35364.4	1.0e+07	7.9e+10	160.767	65.5152	1.8205	4.5e+10	68.7	1.34844	15.4927	0.39664	3091.61	122	514	22.96	1.02291	2.52377	5.76918	0.197765	0.271059	2.15407	2.32189	0.927723
3	BEL	Belgium	比利时	2005	D01T02	19.1	4.1	15	0.900542	0.415569	1	.	1	.	.	.	.	.	10.5559	36809.7	346.057	21.5499	3.4e+10	3.9e+11	61.0855	3.9e+11	36796	1.0e+07	8.5e+10	169.385	65.5589	1.79061	3.4e+10	69	1.30921	19.1175	0.415569	3142.73	105	517	22.5738	0.84064	2.59857	7.07173	0.214708	0.299018	2.17457	2.41474	0.900542
3	BEL	Belgium	比利时	2006	D01T02	20.3	4.1	16.2	0.920537	0.437007	1	.	1	.	.	.	.	.	10.3002	38705.1	348.347	21.3121	5.9e+10	4.1e+11	61.6536	4.1e+11	38672.7	1.1e+07	9.1e+10	176.109	65.5872	1.82269	5.9e+10	71.8	1.30386	23.1654	0.437007	3284.43	161	490	22.1399	0.907269	3.50469	7.94534	0.217941	0.288306	2.18017	2.36837	0.920537
3	BEL	Belgium	比利时	2007	D01T02	32.9	6.1	26.8	0.917402	0.451733	1	.	1	.	.	.	.	.	9.84286	44319.2	350.915	22.3931	9.7e+10	4.7e+11	61.2001	4.7e+11	44262.9	1.1e+07	1.1e+11	179.134	65.6696	1.84999	9.7e+10	72.5	1.30556	25.6214	0.451733	3395.02	163	454	22.282	0.887524	3.65372	7.08102	0.237873	0.30161	2.21319	2.41245	0.917402
3	BEL	Belgium	比利时	2008	D01T02	33.8	7.1	26.7	0.849112	0.401699	1	.	1	.	.	.	.	.	9.98453	48303.4	353.698	20.6236	1.9e+11	5.2e+11	62.0862	5.2e+11	48106.9	1.1e+07	1.2e+11	182.085	65.7653	1.93684	1.9e+11	71.7	1.24365	27.8044	0.401699	3411.75	133	575	21.5954	0.712338	3.30904	9.30589	0.235623	0.340636	2.21673	2.61065	0.849112
3	BEL	Belgium	比利时	2009	D01T02	24.2	6.3	18	0.859586	0.409079	1	.	1	.	.	.	.	.	9.23134	44760.3	356.555	22.3824	7.7e+10	4.8e+11	65.2677	4.8e+11	44583.5	1.1e+07	1.1e+11	150.305	65.8143	1.9986	7.7e+10	72.1	1.3158	29.1932	0.409079	3519.85	148	669	20.6	0.645274	2.71487	7.5111	0.224552	0.326423	2.22981	2.59405	0.859586
3	BEL	Belgium	比利时	2010	D01T02	25.6	7.6	17.9	0.882045	0.394143	1	.	1	.	.	.	.	.	9.795	44184.9	359.828	21.2423	1.3e+11	4.8e+11	67.829	4.8e+11	44141.9	1.1e+07	1.1e+11	166.102	65.7832	2.06188	1.3e+11	70.1	1.32533	31.009	0.394143	3732.83	140	620	20.8946	0.765104	4.28572	10.374	0.227496	0.318814	2.25003	2.55092	0.882045
3	BEL	Belgium	比利时	2011	D01T02	43	11.9	31.1	0.871927	0.355708	1	.	1	.	.	.	.	.	8.7407	47410.6	364.54	23.2432	1.6e+11	5.2e+11	69.8425	5.2e+11	47348.5	1.1e+07	1.2e+11	180.355	65.6475	2.17332	1.6e+11	70.2	1.36186	32.3461	0.355708	3875.64	127	636	20.7779	0.648034	4.20088	12.1932	0.247331	0.356986	2.37693	2.72607	0.871927
3	BEL	Belgium	比利时	2012	D01T02	35	9	26	0.897257	0.372168	1	.	1	.	.	.	.	.	8.57753	44670.6	366.808	20.7474	1.2e+10	5.0e+11	71.192	5.0e+11	44673.1	1.1e+07	1.1e+11	178.376	65.4689	2.28114	1.2e+10	69	1.35655	33.469	0.372168	4113.26	127	755	20.0752	0.781227	4.13064	13.0326	0.240116	0.341299	2.3648	2.63559	0.897257
3	BEL	Belgium	比利时	2013	D01T02	40.7	9.9	30.9	0.874314	0.383708	1	.	1	.	.	.	.	.	8.65515	46758	368.541	21.4255	-30000000000	5.2e+11	72.1155	5.2e+11	46744.7	1.1e+07	1.2e+11	176.45	65.2584	2.33073	-30000000000	69.2	1.38737	34.4846	0.383708	4155.91	161	715	19.8792	0.681175	3.31591	13.3096	0.24614	0.35544	2.36793	2.70833	0.874314
3	BEL	Belgium	比利时	2014	D01T02	39.6	9.3	30.3	0.861166	0.359731	1	.	1	.	.	.	.	.	8.04147	47764.1	370.18	18.5896	-15000000000	5.3e+11	72.9974	5.4e+11	47700.5	1.1e+07	1.2e+11	173.168	65.046	2.37002	-15000000000	69.9	1.28395	35.8889	0.359731	4528.92	137	889	19.6748	0.637836	2.79488	11.4127	0.236831	0.351349	2.32079	2.69494	0.861166
3	BEL	Belgium	比利时	2015	D01T02	38.5	8.7	29.8	0.888693	0.433215	1	.	1	.	.	.	.	.	8.43801	41008.3	372.331	15.1103	-20000000000	4.6e+11	74.5598	4.6e+11	40991.8	1.1e+07	1.1e+11	167.126	64.8535	2.42817	-20000000000	68.8	1.28959	36.6371	0.433215	4711.05	148	949	19.6699	0.686415	2.7867	8.79106	0.256773	0.334458	2.31614	2.60623	0.888693
3	BEL	Belgium	比利时	2016	D01T02	25	6.1	18.8	0.868928	0.431078	1	.	1	.	.	.	.	.	8.31517	42012.6	374.221	.	5.8e+10	4.8e+11	75.8906	4.8e+11	41984.1	1.1e+07	1.1e+11	163.439	64.6114	2.52252	5.8e+10	68.4	1.25248	37.7341	0.431078	4780.52	119	1054	19.2882	0.628433	2.41419	6.43229	0.261289	0.34304	2.27915	2.62295	0.868928
3	BEL	Belgium	比利时	2017	D01T02	31.2	7.3	23.9	0.882836	0.430394	1	.	1	.	.	.	.	.	8.15143	44198.5	375.666	.	-37000000000	5.0e+11	79.6617	5.0e+11	44089.3	1.1e+07	1.2e+11	167.264	64.3794	2.66124	-37000000000	67.8	1.17992	38.4644	0.430394	4729.55	216	1001	19.2354	0.665094	2.70669	7.24845	0.27143	0.34894	2.31702	2.62452	0.882836
3	BEL	Belgium	比利时	2018	D01T02	51.5	11.8	39.6	0.836306	0.441802	1	.	1	.	.	.	.	.	8.19636	47545	377.38	.	-42000000000	5.4e+11	78.9012	5.4e+11	47554.7	1.1e+07	1.3e+11	169.963	64.1558	2.76578	-42000000000	67.5	1.18223	39.3319	0.441802	5003.95	218	892	18.9339	0.603042	3.51236	8.5705	0.277203	0.38002	2.28587	2.7333	0.836306
4	CAN	Ca0da	加拿大	1995	D01T02	296.7	154.5	142.2	1.25497	1.37977	1	.	1	.	.	.	.	.	15.2905	20679	3.26831	20.8067	1.4e+10	6.0e+11	90.5424	6.0e+11	20613.8	2.9e+07	1.1e+11	59.7027	67.6682	1.60497	1.4e+10	69.4	1.60256	.	1.37977	.	24161	2431	.	.	6.69255	9.11003	0.348972	0.19221	2.72239	2.16928	1.25497
4	CAN	Ca0da	加拿大	1996	D01T02	424.4	231.1	193.3	1.25223	1.37517	1	.	1	.	.	.	.	.	15.5926	21296.6	3.30265	20.3266	8.8e+09	6.3e+11	89.2138	6.3e+11	21227.3	3.0e+07	1.2e+11	59.9464	67.6664	1.61209	8.8e+09	70.3	1.61823	.	1.37517	3071.85	24987	2583	.	.	6.12078	10.4795	0.341447	0.186525	2.75259	2.19816	1.25223
4	CAN	Ca0da	加拿大	1997	D01T02	250.2	141.8	108.3	1.21189	1.36392	1	.	1	.	.	.	.	.	15.9439	21901.6	3.33564	18.991	1.5e+10	6.5e+11	74.3578	6.6e+11	21901.6	3.0e+07	1.3e+11	63.4051	67.7562	1.61921	1.5e+10	67.9	1.63389	.	1.36392	3132.9	25238	3344	27.7164	2.1395	5.94188	10.1852	0.360586	0.218988	2.80473	2.31434	1.21189
4	CAN	Ca0da	加拿大	1998	D01T02	397.3	218.5	178.9	1.21986	1.25274	1	.	1	.	.	.	.	.	16.0766	21024.5	3.36343	17.4821	2.5e+10	6.3e+11	59.5019	6.3e+11	21024.6	3.0e+07	1.3e+11	66.308	67.9119	1.71643	2.5e+10	68.5	1.64955	0.464425	1.25274	3171.47	30163	3809	26.8339	2.16737	5.31048	8.23663	0.338616	0.212037	2.7175	2.22772	1.21986
4	CAN	Ca0da	加拿大	1999	D01T02	264.5	141.2	123.3	1.22459	1.08721	1	.	1	.	.	.	.	.	16.2585	22315.2	3.39089	17.5202	2.7e+10	6.8e+11	60.2519	6.8e+11	22315.2	3.0e+07	1.4e+11	67.6033	68.0921	1.75587	2.8e+10	69.3	1.65518	1.91449	1.08721	3255.44	33189	4061	27.8717	2.19621	4.44212	8.48547	0.32441	0.208955	2.7024	2.20677	1.22459
4	CAN	Ca0da	加拿大	2000	D01T02	301	151.8	149.2	1.22097	1.08062	1	.	1	.	.	.	.	.	16.7575	24271	3.42261	17.1891	6.8e+10	7.4e+11	59.1145	7.5e+11	24271	3.1e+07	1.5e+11	70.0107	68.2713	1.86469	6.8e+10	70.5	1.66081	4.59837	1.08062	3527.48	35435	4187	29.5	2.09165	4.6131	14.0974	0.321616	0.214823	2.68061	2.19548	1.22097
4	CAN	Ca0da	加拿大	2001	D01T02	326.8	167	159.8	1.24451	1.17796	1	.	1	.	.	.	.	.	16.3314	23821.4	3.46	17.389	2.8e+10	7.4e+11	59.3305	7.4e+11	23822.1	3.1e+07	1.5e+11	65.9217	68.49	2.02831	2.8e+10	71.2	1.65987	9.14757	1.17796	3708.22	35753	3963	28.4475	2.11789	4.57634	15.3002	0.316804	0.196684	2.65516	2.13349	1.24451
4	CAN	Ca0da	加拿大	2002	D01T02	189.6	97.8	91.8	1.23482	1.13792	1	.	1	.	.	.	.	.	16.7204	24255.3	3.49783	17.6893	2.4e+10	7.6e+11	59.5466	7.6e+11	24255.3	3.1e+07	1.5e+11	63.0899	68.6857	1.97873	2.5e+10	74.6	1.65894	11.222	1.13792	3719.26	35782	3959	27.5731	1.98762	4.44361	12.6185	0.309725	0.199978	2.66655	2.15947	1.23482
4	CAN	Ca0da	加拿大	2003	D01T02	106.7	50.7	56.1	1.21937	1.00462	1	.	1	.	.	.	.	.	17.2084	28300.5	3.5295	16.7946	7.0e+09	9.0e+11	60.3573	9.0e+11	28300.5	3.2e+07	1.8e+11	57.8154	68.8672	1.97478	7.0e+09	74.8	1.64504	14.2729	1.00462	3913.55	33299	3929	27.9074	2.05309	4.45212	16.1206	0.269271	0.177261	2.54322	2.08569	1.21937
4	CAN	Ca0da	加拿大	2004	D01T02	466.3	193.7	272.7	1.29156	1.01628	1	.	1	.	.	.	.	.	16.7942	32143.7	3.56258	17.9515	1.5e+09	1.0e+12	61.168	1.0e+12	32143.7	3.2e+07	2.1e+11	58.1181	69.0444	2.00416	1.5e+09	75.3	1.60477	16.9718	1.01628	4098	32970	5231	28.3911	2.16781	5.46924	17.7568	0.281097	0.161857	2.59949	2.01267	1.29156
4	CAN	Ca0da	加拿大	2005	D01T02	388.9	138.9	250	1.25179	1.03573	1	.	1	.	.	.	.	.	17.0276	36382.5	3.59639	18.319	2.6e+10	1.2e+12	61.9787	1.2e+12	36382.5	3.2e+07	2.6e+11	58.2117	69.2065	1.97759	2.6e+10	75.8	1.5553	21.7408	1.03573	4250.05	34705	5183	29.213	1.88031	5.85004	21.4039	0.281656	0.176182	2.63422	2.10436	1.25179
4	CAN	Ca0da	加拿大	2006	D01T02	291	96.8	194.2	1.22829	1.19248	1	.	1	.	.	.	.	.	16.5952	40504.1	3.63291	18.8124	6.4e+10	1.3e+12	62.7894	1.3e+12	40504.1	3.3e+07	3.0e+11	56.6359	69.3303	1.94872	6.4e+10	77.4	1.61377	24.7265	1.19248	4323.08	36516	5522	28.8476	1.70102	7.96768	21.138	0.279727	0.180171	2.62166	2.1344	1.22829
4	CAN	Ca0da	加拿大	2007	D01T02	513.2	154.5	358.7	1.14392	1.40739	1	.	1	.	.	.	.	.	17.3806	44659.9	3.66836	18.7328	1.2e+11	1.5e+12	63.6001	1.5e+12	44659.9	3.3e+07	3.4e+11	55.2063	69.4277	1.90857	1.2e+11	78	1.59566	27.6161	1.40739	4595.4	35133	4998	28.6859	1.58716	9.24435	22.114	0.276414	0.19143	2.5472	2.22673	1.14392
4	CAN	Ca0da	加拿大	2008	D01T02	1045.3	311.9	733.4	1.10433	1.74564	1	.	1	.	.	.	.	.	16.5569	46710.5	3.7083	19.1859	7.0e+10	1.6e+12	63.7674	1.6e+12	46710.5	3.3e+07	3.7e+11	56.374	69.4763	1.8604	7.0e+10	80.2	1.61715	29.6289	1.74564	4715.39	37028	5061	29.342	1.76827	8.25104	29.1358	0.293884	0.187416	2.43112	2.20143	1.10433
4	CAN	Ca0da	加拿大	2009	D01T02	1728.2	526.4	1201.8	1.09125	1.84765	1	.	1	.	.	.	.	.	15.502	40876.3	3.75088	18.8996	2.1e+10	1.4e+12	63.0658	1.4e+12	40876.3	3.4e+07	3.1e+11	46.9947	69.4557	1.92227	2.1e+10	80.5	1.63997	30.6305	1.84765	4451.48	32410	5067	25.076	1.54989	7.10416	24.4206	0.272573	0.194883	2.47129	2.26463	1.09125
4	CAN	Ca0da	加拿大	2010	D01T02	1347.6	412	935.7	1.09319	1.59005	1	.	1	.	.	.	.	.	15.7921	47562.1	3.79282	18.5611	3.0e+10	1.6e+12	61.6558	1.6e+12	47562.1	3.4e+07	3.8e+11	48.8561	69.3578	1.82958	3.0e+10	80.4	1.60725	31.8493	1.59005	4646.31	30899	4550	26.3511	1.49324	7.99427	25.3244	0.258514	0.194619	2.48483	2.273	1.09319
4	CAN	Ca0da	加拿大	2011	D01T02	1806.3	531.2	1275.2	1.12789	1.60725	1	.	1	.	.	.	.	.	15.9958	52223.7	3.83012	18.7091	3.8e+10	1.8e+12	63.4673	1.8e+12	52223.7	3.4e+07	4.2e+11	51.0211	69.1335	1.79132	3.8e+10	80.8	1.60686	32.8713	1.60725	4780.08	30357	4754	27.1393	1.76566	8.70974	27.4325	0.271875	0.183462	2.46222	2.18302	1.12789
4	CAN	Ca0da	加拿大	2012	D01T02	3025.3	877.1	2148.2	1.10454	1.75039	1	.	1	.	.	.	.	.	15.7344	52669.1	3.87194	19.3476	4.9e+10	1.8e+12	63.9808	1.8e+12	52669.1	3.5e+07	4.5e+11	50.9683	68.8994	1.77232	4.9e+10	79.9	1.62026	33.6964	1.75039	4627.45	30533	4709	26.6347	1.81135	7.27699	25.6242	0.267252	0.194357	2.5146	2.27659	1.10454
4	CAN	Ca0da	加拿大	2013	D01T02	3663.5	938.3	2725.2	1.09782	1.83344	1	.	1	.	.	.	.	.	15.8384	52635.2	3.91307	19.9124	6.7e+10	1.8e+12	65.3323	1.9e+12	52635.2	3.5e+07	4.5e+11	50.5847	68.6309	1.7054	6.7e+10	79.4	1.61429	34.4928	1.83344	4623.12	30174	4567	26.6132	1.89423	6.97314	26.3616	0.276128	0.192406	2.44476	2.22692	1.09782
4	CAN	Ca0da	加拿大	2014	D01T02	4194.7	985	3209.7	1.12441	1.97318	1	.	1	.	.	.	.	.	15.8498	50956	3.9526	19.6911	6.4e+10	1.8e+12	65.6129	1.8e+12	50956	3.5e+07	4.4e+11	52.6994	68.3151	1.71417	6.4e+10	80.2	1.65342	35.4982	1.97318	4541.85	31283	4198	27.1379	1.58655	7.06902	28.8931	0.33202	0.215105	2.60984	2.32107	1.12441
4	CAN	Ca0da	加拿大	2015	D01T02	3570.7	742.5	2828.2	1.14619	2.09549	1	.	1	.	.	.	.	.	15.6486	43596.1	3.98222	19.7708	6.0e+10	1.6e+12	64.787	1.6e+12	43596.1	3.6e+07	3.7e+11	53.9789	67.9549	1.69324	6.0e+10	79.1	1.65837	36.7047	2.09549	4523.31	32687	4277	24.4157	1.86984	7.07783	20.6034	0.320476	0.206064	2.54912	2.224	1.14619
4	CAN	Ca0da	加拿大	2016	D01T02	3311.1	733.3	2577.8	1.12554	1.98671	1	.	1	.	.	.	.	.	15.4205	42315.6	4.02756	.	3.4e+10	1.5e+12	66.4392	1.5e+12	42315.6	3.6e+07	3.5e+11	52.548	67.647	1.72873	3.4e+10	78	1.67588	37.0678	1.98671	4369.63	30667	4078	23.2953	1.86223	6.85097	17.6256	0.308433	0.207314	2.50892	2.22908	1.12554
4	CAN	Ca0da	加拿大	2017	D01T02	4029.1	958.7	3070.4	1.12541	1.88172	1	.	1	.	.	.	.	.	15.5446	45129.4	4.07617	.	2.5e+10	1.6e+12	68.9225	1.7e+12	45129.4	3.7e+07	3.7e+11	52.4061	67.2875	1.66886	2.5e+10	78.5	1.67472	38.0907	1.88172	4422.56	30969	4053	24.0278	1.88999	7.31667	21.9518	0.297876	0.204736	2.48637	2.2093	1.12541
4	CAN	Ca0da	加拿大	2018	D01T02	4800.7	1192	3608.6	1.14187	1.91484	1	.	1	.	.	.	.	.	15.6505	46547.8	4.13415	.	4.3e+10	1.7e+12	70.113	1.7e+12	46454.7	3.7e+07	3.9e+11	53.501	66.8977	1.56287	4.3e+10	77.7	1.58963	39.005	1.91484	4516.3	31812	4349	24.6223	1.69989	7.53045	24.019	0.304476	0.208417	2.52745	2.21344	1.14187
5	CHL	Chile	智利	1995	D01T02	0.8	0.6	0.2	1.03794	2.60447	0	.	1	.	.	.	.	.	2.70324	5094.51	19.3896	7.45248	3.0e+09	7.3e+10	27.436	7.4e+10	5107.28	1.4e+07	1.9e+10	43.4626	64.0971	-0.47523	3.0e+09	71.2	1.22901	.	2.60447	.	1535	171	38.0435	7.00303	47.1214	0.242583	0.215181	0.106413	1.91964	1.84948	1.03794
5	CHL	Chile	智利	1996	D01T02	0.9	0.7	0.2	1.0169	2.5408	0	.	1	.	.	.	.	.	3.07183	5376.15	19.6568	6.25053	4.8e+09	7.8e+10	29.2095	7.8e+10	5349.81	1.5e+07	2.1e+10	45.9075	64.1827	-0.40983	4.8e+09	72.6	1.14161	.	2.5408	.	1771	176	30.8497	5.01956	44.9532	0.179532	0.200307	0.111424	1.87398	1.84284	1.0169
5	CHL	Chile	智利	1997	D01T02	1.7	1	0.7	1.015	2.31888	0	.	1	.	.	.	.	.	3.46304	5788.86	19.9175	6.31265	5.3e+09	8.5e+10	30.1098	8.5e+10	5745.37	1.5e+07	2.4e+10	45.5455	64.3259	-0.34443	5.3e+09	75.9	1.05421	.	2.31888	.	2411	161	29.9915	5.00655	46.9501	0.296582	0.191326	0.115045	1.87117	1.84351	1.015
5	CHL	Chile	智利	1998	D01T02	0.8	0.7	0.1	1.0437	2.13565	0	.	1	.	.	.	.	.	3.46833	5467.57	20.1696	5.0743	4.6e+09	8.2e+10	32.0079	8.2e+10	5446.58	1.5e+07	2.2e+10	44.3811	64.5181	-0.27903	4.6e+09	74.9	0.966811	.	2.13565	.	2568	207	27.3297	5.39423	42.0281	0.385831	0.170123	0.10409	1.85339	1.77579	1.0437
5	CHL	Chile	智利	1999	D01T02	3.3	2	1.3	1.0258	2.12561	0	.	1	.	.	.	.	.	3.58651	4981.19	20.4112	4.22844	8.8e+09	7.5e+10	35.3676	7.5e+10	4957.78	1.5e+07	1.6e+10	44.0965	64.7502	-0.21363	8.8e+09	74.1	1.05153	.	2.12561	.	2608	204	27.0229	5.29404	42.4625	0.430606	0.182008	0.113934	1.94261	1.89375	1.0258
5	CHL	Chile	智利	2000	D01T02	6.7	3.7	3	1.05179	2.13684	0	.	1	.	.	.	.	.	3.2846	5097.11	20.6471	5.80198	4.9e+09	7.8e+10	35.3763	7.8e+10	5074.9	1.5e+07	1.6e+10	48.4415	65.0176	-0.14823	4.9e+09	74.7	1.13625	0.050027	2.13684	.	2879	241	27.8329	5.08296	44.5231	1.11402	0.184677	0.122019	2.01816	1.91878	1.05179
5	CHL	Chile	智利	2001	D01T02	7.9	4.3	3.6	0.9887	1.88913	0	.	1	.	.	.	.	.	3.11937	4606.89	20.8787	6.79874	4.2e+09	7.1e+10	37.8773	7.1e+10	4574.59	1.6e+07	1.5e+10	50.2973	65.3798	-0.08283	4.2e+09	75.1	1.21164	0.429806	1.88913	.	2504	246	28.4826	4.06242	40.6931	1.45351	0.190373	0.153249	2.069	2.09264	0.9887
5	CHL	Chile	智利	2002	D01T02	10.6	5.7	4.9	0.976107	1.74077	0	.	1	.	.	.	.	.	3.12999	4479.18	21.1071	7.02438	2.5e+09	7.0e+10	40.3783	7.0e+10	4446.25	1.6e+07	1.5e+10	50.5773	65.7401	-0.01743	2.6e+09	77.8	1.28704	1.20082	1.74077	.	2147	391	28.518	4.06503	40.5583	1.18808	0.177868	0.155285	2.06913	2.11977	0.976107
5	CHL	Chile	智利	2003	D01T02	9.6	4.9	4.7	1.00355	1.62847	0	.	1	.	.	.	.	.	3.16541	4824.22	21.3294	6.85347	4.0e+09	7.6e+10	43.4695	7.6e+10	4772.56	1.6e+07	1.6e+10	54.1831	66.1106	0.04797	4.0e+09	76	1.18397	2.22102	1.62847	.	2076	329	29.7153	4.09478	41.0325	2.8632	0.19813	0.167625	2.28439	2.27631	1.00355
5	CHL	Chile	智利	2004	D01T02	18.7	8	10.7	1.03019	1.86994	0	.	1	.	.	.	.	.	3.4319	6185.51	21.5431	6.3155	6.8e+09	9.9e+10	43.9302	9.9e+10	6194.85	1.6e+07	2.0e+10	57.7702	66.5003	0.11337	6.8e+09	76.9	1.20097	2.98966	1.86994	.	2485	382	32.7525	3.75827	52.8933	2.25407	0.23308	0.165133	2.32889	2.26063	1.03019
5	CHL	Chile	智利	2005	D01T02	29.2	10.8	18.4	1.0668	2.07615	0	.	1	.	.	.	.	.	3.46014	7561.83	21.7547	7.39383	7.5e+09	1.2e+11	49.3688	1.2e+11	7598.53	1.6e+07	2.7e+10	60.1814	66.9012	0.17877	7.5e+09	77.8	1.25104	4.38053	2.07615	.	2646	361	34.0353	3.92221	56.3236	2.80899	0.24842	0.165704	2.30473	2.16041	1.0668
5	CHL	Chile	智利	2006	D01T02	36.9	12.8	24.2	1.05877	2.2446	0	.	1	.	.	.	.	.	3.4986	9418.06	21.9689	7.79475	7.6e+09	1.5e+11	48.2347	1.6e+11	9464.55	1.6e+07	3.1e+10	62.7219	67.28	0.24417	7.6e+09	78	1.15567	6.19328	2.2446	.	2924	291	38.6847	3.71205	62.5206	2.43372	0.285696	0.171886	2.25208	2.12706	1.05877
5	CHL	Chile	智利	2007	D01T02	53.2	16.5	36.7	1.0571	2.1939	0	.	1	.	.	.	.	.	3.91463	10461.4	22.1854	5.89008	1.3e+10	1.7e+11	53.9567	1.7e+11	10502.4	1.7e+07	3.6e+10	66.3203	67.6542	0.30957	1.4e+10	77.7	1.16302	7.89492	2.1939	335.806	3403	403	37.4666	3.55057	64.31	1.83162	0.301759	0.181706	2.27555	2.15265	1.0571
5	CHL	Chile	智利	2008	D01T02	79.1	24.2	55	1.02774	2.00498	0	.	1	.	.	.	.	.	4.08077	10783.2	22.4085	6.15783	1.8e+10	1.8e+11	56.7313	1.8e+11	10751.5	1.7e+07	4.6e+10	70.8629	68.0064	0.37497	1.9e+10	78.6	1.13727	8.56574	2.00498	356.654	3421	531	31.984	3.42443	55.7247	2.35499	0.261414	0.198433	2.27638	2.21494	1.02774
5	CHL	Chile	智利	2009	D01T02	113.3	35.3	78	1.05705	2.13087	0	.	1	.	.	.	.	.	3.88813	10182.9	22.6398	6.57765	1.4e+10	1.7e+11	60.9115	1.7e+11	10208.9	1.7e+07	3.9e+10	57.0041	68.3122	0.35202	1.4e+10	78.3	1.16784	9.82969	2.13087	287.75	1374	343	31.8892	3.69713	58.2802	1.4469	0.256129	0.154974	2.23098	2.11057	1.05705
5	CHL	Chile	智利	2010	D01T02	194.2	60.6	133.5	1.10299	1.9341	0	.	1	.	.	.	.	.	4.10194	12767.8	22.8694	5.56767	1.6e+10	2.2e+11	67.8634	2.2e+11	12808	1.7e+07	4.7e+10	59.6309	68.5562	0.32947	1.6e+10	77.2	1.21984	10.523	1.9341	318.827	748	328	33.4669	3.47828	63.2867	1.10226	0.258428	0.14937	2.22757	2.01957	1.10299
5	CHL	Chile	智利	2011	D01T02	394.5	118.8	275.7	1.08619	1.8321	0	.	1	.	.	.	.	.	4.4528	14628.6	23.0973	4.81548	2.6e+10	2.5e+11	72.2768	2.5e+11	14637.2	1.7e+07	5.8e+10	61.8956	68.7043	0.35144	2.6e+10	77.4	1.18792	11.7113	1.8321	352.707	2453	339	32.4418	3.62618	60.7044	1.29993	0.253986	0.165314	2.25876	2.07952	1.08619
5	CHL	Chile	智利	2012	D01T02	390.5	116.4	274.1	1.08407	1.94184	0	.	1	.	.	.	.	.	4.5216	15406.5	23.3235	4.2918	3.2e+10	2.7e+11	75.9311	2.7e+11	15351.5	1.7e+07	6.7e+10	59.098	68.819	0.3622	3.1e+10	78.3	1.19746	12.492	1.94184	390.682	2683	336	30.5583	3.27493	59.1485	1.28288	0.246522	0.170404	2.30297	2.12438	1.08407
5	CHL	Chile	智利	2013	D01T02	436.1	116	320.1	1.0885	2.09795	0	.	1	.	.	.	.	.	4.74008	15833.3	23.5497	4.08271	2.1e+10	2.8e+11	79.9563	2.8e+11	15842.9	1.8e+07	6.9e+10	56.0818	68.8838	0.3887	2.2e+10	79	1.18923	13.1078	2.09795	335.367	2732	340	29.4304	3.47338	56.5992	1.37756	0.262771	0.164548	2.29918	2.11225	1.0885
5	CHL	Chile	智利	2014	D01T02	501.8	122.9	378.9	1.12324	2.02429	0	.	1	.	.	.	.	.	4.32859	14666.3	23.788	5.64539	2.6e+10	2.6e+11	82.8464	2.6e+11	14671	1.8e+07	6.2e+10	56.7729	68.8894	0.37503	2.4e+10	78.7	1.18014	14.0765	2.02429	427.122	2653	452	28.9029	3.94662	54.4938	1.27303	0.239442	0.153399	2.32144	2.06673	1.12324
5	CHL	Chile	智利	2015	D01T02	601.3	130.1	471.2	1.15206	2.41128	0	.	1	.	.	.	.	.	4.60128	13569.9	24.0341	5.72221	1.8e+10	2.4e+11	85.2667	2.4e+11	13574.2	1.8e+07	5.8e+10	51.0099	68.8366	0.38073	2.1e+10	78.5	1.08222	15.2178	2.41128	454.959	2831	443	27.8806	3.7094	52.341	0.8986	0.238117	0.130916	2.29468	1.9918	1.15206
5	CHL	Chile	智利	2016	D01T02	679.5	156.7	522.8	1.19182	2.68673	0	.	1	.	.	.	.	.	4.78282	13785.7	24.3216	.	1.1e+10	2.5e+11	87.1881	2.5e+11	13753.6	1.8e+07	5.7e+10	47.9532	68.8222	0.36934	1.2e+10	77.7	1.01023	16.0617	2.68673	493.459	2521	386	26.7796	4.19909	50.4034	0.899957	0.244513	0.107498	2.26739	1.90246	1.19182
5	CHL	Chile	智利	2017	D01T02	590.7	145.8	444.8	1.14689	2.27718	0	.	1	.	.	.	.	.	4.74028	15045.5	24.7045	.	5.2e+09	2.8e+11	88.4644	2.8e+11	14998.8	1.8e+07	5.8e+10	48.3885	68.7839	0.35608	6.1e+09	76.5	0.940911	16.6719	2.27718	492.621	2469	425	27.3812	4.28097	54.0633	1.06104	0.219191	0.112945	2.18688	1.9068	1.14689
5	CHL	Chile	智利	2018	D01T02	911.8	230.1	681.7	1.11998	2.35963	0	.	1	.	.	.	.	.	4.63098	15795.7	25.1522	.	7.9e+09	3.0e+11	90.8963	3.0e+11	15888.1	1.9e+07	6.4e+10	50.3902	68.7163	0.34282	7.8e+09	75.2	1.00588	17.3831	2.35963	523.463	2694	406	27.8615	3.92744	52.4217	1.17912	0.232234	0.135115	2.24442	2.00398	1.11998
6	COL	Colombia	哥伦比亚	1995	D01T02	1.2	0.6	0.5	1.26993	11.3262	0	.	1	.	.	.	.	.	1.64896	2571.47	32.4201	8.17525	9.7e+08	9.3e+10	16.6697	9.3e+10	2539.91	3.6e+07	2.1e+10	25.9212	60.8647	0.3248	9.7e+08	64.5	-0.70367	.	11.3262	.	1093	141	29.2289	14.0181	0.600806	27.2318	0.219253	0.067867	1.82484	1.43696	1.26993
6	COL	Colombia	哥伦比亚	1996	D01T02	0.1	0.1	0	1.24837	9.719	0	.	1	.	.	.	.	.	1.60095	2652.1	33.0172	9.01413	3.1e+09	9.7e+10	17.9104	9.7e+10	2620.54	3.7e+07	2.1e+10	24.9804	61.066	0.29923	3.1e+09	64.3	-0.663474	.	9.719	.	1172	87	28.519	12.7688	0.5576	35.9491	0.204235	0.072423	1.87358	1.50082	1.24837
6	COL	Colombia	哥伦比亚	1997	D01T02	0.2	0.1	0.1	1.27618	11.1342	0	.	1	.	.	.	.	.	1.72129	2860.04	33.6115	7.83885	5.6e+09	1.1e+11	21.1067	1.1e+11	2827.38	3.8e+07	2.2e+10	25.2204	61.3369	0.27366	5.6e+09	66.4	-0.623279	.	11.1342	.	1497	80	27.0787	12.6065	0.53318	31.3669	0.228615	0.069055	1.87899	1.47236	1.27618
6	COL	Colombia	哥伦比亚	1998	D01T02	4.9	2.7	2.2	1.32024	11.4622	0	.	1	.	.	.	.	.	1.69838	2595.54	34.1996	7.07791	2.8e+09	9.8e+10	23.6722	9.8e+10	2566.02	3.8e+07	1.9e+10	25.9285	61.6447	0.22577	2.8e+09	65.5	-0.583083	.	11.4622	.	1670	161	26.3923	13.2358	0.631339	30.2541	0.219653	0.054023	1.7993	1.36286	1.32024
6	COL	Colombia	哥伦比亚	1999	D01T02	14.9	8	6.9	1.38805	11.1692	0	.	1	.	.	.	.	.	1.43574	2236.07	34.777	8.45476	1.5e+09	8.6e+10	23.2974	8.6e+10	2209.93	3.9e+07	1.1e+10	25.7976	61.9456	0.17788	1.5e+09	65.3	-0.587138	.	11.1692	.	1615	68	26.7208	13.0008	0.67975	40.4791	0.240755	0.041874	1.82874	1.31749	1.38805
6	COL	Colombia	哥伦比亚	2000	D01T02	6.3	3.2	3.1	1.22494	3.41013	0	.	1	.	.	.	.	.	1.48773	2546.85	35.3449	8.26017	2.4e+09	1.0e+11	24.492	1.0e+11	2520.48	4.0e+07	1.4e+10	24.6099	62.2228	0.12999	2.4e+09	63.3	-0.591194	0.022624	3.41013	.	1694	75	27.3058	8.30572	0.663276	43.0795	0.094113	0.075547	2.14155	1.7483	1.22494
6	COL	Colombia	哥伦比亚	2001	D01T02	2.7	1.4	1.3	1.2162	3.47202	0	.	1	.	.	.	.	.	1.47955	2465.01	35.9062	8.61687	2.5e+09	9.8e+10	25.3475	9.8e+10	2439.68	4.0e+07	1.5e+10	25.5815	62.5611	0.13183	2.5e+09	65.6	-0.604433	0.034716	3.47202	.	432	65	27.2228	8.32097	0.810077	36.2987	0.088804	0.076033	2.08654	1.71562	1.2162
6	COL	Colombia	哥伦比亚	2002	D01T02	1.7	0.9	0.8	1.22318	3.79158	0	.	1	.	.	.	.	.	1.40325	2421.16	36.4615	9.1098	2.1e+09	9.8e+10	25.4306	9.8e+10	2396.63	4.1e+07	1.6e+10	25.134	62.8525	0.13944	2.1e+09	64.2	-0.617673	0.086241	3.79158	.	858	54	27.529	8.51001	0.8257	35.9188	0.087733	0.072144	2.07245	1.69431	1.22318
6	COL	Colombia	哥伦比亚	2003	D01T02	0.5	0.3	0.2	1.17819	3.58626	0	.	1	.	.	.	.	.	1.36659	2305.17	37.0056	9.55054	1.7e+09	9.5e+10	26.7836	9.5e+10	2281.4	4.1e+07	1.7e+10	28.496	63.1321	0.15602	1.7e+09	64.2	-0.654428	0.15694	3.58626	.	1127	82	28.9038	8.32877	1.01256	37.1904	0.093314	0.084827	2.01559	1.71076	1.17819
6	COL	Colombia	哥伦比亚	2004	D01T02	0.5	0.2	0.2	1.19909	3.53387	0	.	1	.	.	.	.	.	1.34729	2811.46	37.5379	10.2967	3.1e+09	1.2e+11	28.1366	1.2e+11	2782.62	4.2e+07	2.2e+10	28.1599	63.4546	0.15353	3.1e+09	61.2	-0.605224	0.305206	3.53387	.	1365	76	29.7259	7.91098	1.26204	36.9077	0.09169	0.082391	2.05441	1.71331	1.19909
6	COL	Colombia	哥伦比亚	2005	D01T02	0.7	0.3	0.4	1.20318	3.55848	0	.	1	.	.	.	.	.	1.36513	3448.54	38.054	9.78572	1.0e+10	1.5e+11	30.6922	1.5e+11	3414.47	4.3e+07	3.1e+10	29.1129	63.8429	0.15086	1.0e+10	59.6	-0.550704	0.754798	3.55848	.	1662	99	30.3481	7.52727	1.34002	39.2456	0.090311	0.076792	2.01347	1.67345	1.20318
6	COL	Colombia	哥伦比亚	2006	D01T02	1.1	0.4	0.8	1.20263	3.52769	0	.	1	.	.	.	.	.	1.34872	3782.6	38.5515	9.77152	6.8e+09	1.6e+11	32.6995	1.6e+11	3741.09	4.3e+07	3.7e+10	31.2792	64.2409	0.1495	6.8e+09	60.4	-0.461168	1.4684	3.52769	.	1861	142	30.9135	7.18677	2.38449	38.4317	0.092979	0.08337	2.00319	1.66568	1.20263
6	COL	Colombia	哥伦比亚	2007	D01T02	1.9	0.5	1.4	1.19487	3.23929	0	.	1	.	.	.	.	.	1.36646	4762.08	39.0325	10.345	8.9e+09	2.1e+11	33.7499	2.1e+11	4714.07	4.4e+07	5.0e+10	30.5012	64.714	0.18455	8.9e+09	59.9	-0.40431	2.78731	3.23929	.	1862	128	30.579	6.93456	2.34101	36.2508	0.08482	0.076475	1.98826	1.66399	1.19487
6	COL	Colombia	哥伦比亚	2008	D01T02	1.9	0.6	1.3	1.16285	2.25762	0	.	1	.	.	.	.	.	1.36441	5534.69	39.491	10.3819	1.1e+10	2.4e+11	36.0769	2.4e+11	5472.54	4.4e+07	5.3e+10	31.9154	65.225	0.20125	1.1e+10	62.2	-0.402997	4.04445	2.25762	.	1818	126	32.1311	6.68738	1.99774	45.9657	0.079207	0.0846	1.97684	1.69999	1.16285
6	COL	Colombia	哥伦比亚	2009	D01T02	2.9	1	1.9	1.19396	2.45935	0	.	1	.	.	.	.	.	1.3993	5245.95	39.9404	9.34038	8.0e+09	2.3e+11	37.519	2.3e+11	5193.24	4.5e+07	5.3e+10	28.2924	65.7133	0.19608	8.0e+09	62.3	-0.462848	4.77228	2.45935	.	1551	128	31.247	6.68974	1.57475	48.3004	0.077736	0.066933	1.94081	1.62552	1.19396
6	COL	Colombia	哥伦比亚	2010	D01T02	2.4	1.3	1.1	1.19291	2.23976	0	.	1	.	.	.	.	.	1.41834	6392.76	40.3931	8.85051	6.4e+09	2.9e+11	39.4133	2.9e+11	6336.71	4.5e+07	6.3e+10	27.9865	66.1451	0.19501	6.4e+09	65.5	-0.361551	5.89751	2.23976	.	1739	133	31.3714	6.32485	1.55486	57.1598	0.077219	0.062699	1.92006	1.60956	1.19291
6	COL	Colombia	哥伦比亚	2011	D01T02	2.7	1.3	1.4	1.19826	1.58409	0	.	1	.	.	.	.	.	1.52502	7392.94	40.8372	11.0055	1.5e+10	3.3e+11	43.0323	3.4e+11	7335.17	4.6e+07	7.3e+10	33.1841	66.5848	0.20595	1.5e+10	68	-0.248479	7.38959	1.58409	.	1770	183	33.3022	6.0917	1.18352	64.829	0.077424	0.070407	1.93935	1.61846	1.19826
6	COL	Colombia	哥伦比亚	2012	D01T02	4.1	2.2	1.9	1.12423	1.66544	0	.	1	.	.	.	.	.	1.52231	8096.8	41.264	10.5969	1.5e+10	3.7e+11	45.3073	3.7e+11	8050.26	4.6e+07	7.8e+10	32.1289	66.95	0.23378	1.5e+10	68	-0.297249	8.60299	1.66544	.	1848	213	33.4055	5.58269	1.08359	65.7196	0.072375	0.076338	1.85332	1.64852	1.12423
6	COL	Colombia	哥伦比亚	2013	D01T02	4.4	2.6	1.8	1.10704	1.82434	0	.	1	.	.	.	.	.	1.66234	8263.64	41.6746	8.97407	1.6e+10	3.8e+11	48.7331	3.8e+11	8218.35	4.6e+07	8.2e+10	30.9385	67.2569	0.27111	1.6e+10	69.6	-0.285015	9.81363	1.82434	57.3604	1781	251	32.7476	5.39271	1.09601	66.7714	0.074782	0.077762	1.82931	1.65243	1.10704
6	COL	Colombia	哥伦比亚	2014	D01T02	8.9	4.2	4.7	1.11996	1.8188	0	.	1	.	.	.	.	.	1.69676	8167.47	42.0712	9.20354	1.6e+10	3.8e+11	51.4164	3.8e+11	8114.34	4.7e+07	8.6e+10	31.1945	67.5305	0.30563	1.6e+10	70.7	-0.237127	10.773	1.8188	58.2954	1898	260	30.9859	5.44696	0.968202	65.5731	0.080391	0.088342	1.96494	1.75448	1.11996
6	COL	Colombia	哥伦比亚	2015	D01T02	9	4.7	4.3	1.11866	2.54506	0	.	1	.	.	.	.	.	1.70264	6228.65	42.4693	.	1.2e+10	2.9e+11	53.2821	2.9e+11	6175.88	4.8e+07	6.9e+10	30.5808	67.7756	0.28975	1.2e+10	71.7	-0.200418	11.7271	2.54506	69.5487	1921	321	28.5894	5.98042	1.26412	52.7864	0.09084	0.09322	1.96231	1.75416	1.11866
6	COL	Colombia	哥伦比亚	2016	D01T02	8	4.3	3.7	1.12612	2.86521	0	.	1	.	.	.	.	.	1.73612	5936.26	42.9256	.	1.4e+10	2.8e+11	55.4842	2.8e+11	5870.78	4.8e+07	6.3e+10	27.1001	68.0179	0.26694	1.4e+10	70.8	-0.15788	12.4154	2.86521	89.3616	1658	545	27.6892	6.60641	1.16347	47.4973	0.087999	0.085959	1.93364	1.71708	1.12612
6	COL	Colombia	哥伦比亚	2017	D01T02	10.6	5.4	5.2	1.13003	2.9034	0	.	1	.	.	.	.	.	1.55091	6449.97	43.5797	.	1.4e+10	3.1e+11	56.434	3.1e+11	6376.71	4.9e+07	6.8e+10	26.6038	68.244	0.24286	1.4e+10	69.7	-0.187441	13.0937	2.9034	88.0191	1777	595	26.8149	6.38966	1.24584	54.1371	0.09319	0.082276	1.93981	1.7166	1.13003
6	COL	Colombia	哥伦比亚	2018	D01T02	20.5	8.4	12.1	1.1116	2.99111	0	.	1	.	.	.	.	.	1.59491	6782.04	44.4137	.	1.1e+10	3.3e+11	55.3275	3.3e+11	6729.58	5.0e+07	7.1e+10	27.8299	68.4441	0.23462	1.1e+10	68.9	-0.181457	13.5531	2.99111	.	1808	415	26.8955	6.22571	1.19144	57.8788	0.099335	0.085389	1.91214	1.72017	1.1116
7	CRI	Costa Rica	哥斯达黎加	1995	D01T02	0.7	0.5	0.2	1.45806	7.84488	0	.	1	.	.	.	.	.	1.34621	3240.71	69.9737	13.0485	3.4e+08	1.2e+10	2.02182	1.2e+10	3265.69	3.5e+06	2.3e+09	65.3447	60.8421	0.31038	3.4e+08	68	0.642417	.	7.84488	.	111	25	26.5701	12.7581	1.06186	0.774151	0.34011	0.109852	2.34438	1.60788	1.45806
7	CRI	Costa Rica	哥斯达黎加	1996	D01T02	0.2	0.1	0.1	1.37937	7.83657	0	.	1	.	.	.	.	.	1.23813	3194.11	71.6066	14.5996	4.3e+08	1.2e+10	4.75914	1.2e+10	3215.11	3.6e+06	2.1e+09	69.2302	61.2378	0.30377	4.3e+08	66.4	0.694335	.	7.83657	.	126	23	25.9859	12.1025	1.18743	0.863742	0.349716	0.131889	2.32029	1.68214	1.37937
7	CRI	Costa Rica	哥斯达黎加	1997	D01T02	0.3	0.2	0.1	1.42901	7.95034	0	.	1	.	.	.	.	.	1.20176	3373.41	73.2358	16.3014	4.1e+08	1.3e+10	7.49646	1.3e+10	3391.98	3.7e+06	2.4e+09	73.7637	61.6614	0.29716	4.1e+08	65.6	0.746253	.	7.95034	.	113	25	26.0415	12.5031	0.950116	0.45316	0.36373	0.125337	2.32174	1.62472	1.42901
7	CRI	Costa Rica	哥斯达黎加	1998	D01T02	5.8	3.2	2.6	1.44209	8.03677	0	.	1	.	.	.	.	.	1.31242	3580.93	74.8418	16.9292	6.1e+08	1.4e+10	10.2338	1.4e+10	3597.43	3.8e+06	3.0e+09	85.9747	62.1276	0.26656	6.2e+08	65.6	0.798171	.	8.03677	.	172	22	25.9856	12.619	0.784854	0.387011	0.366125	0.126773	2.30439	1.59795	1.44209
7	CRI	Costa Rica	哥斯达黎加	1999	D01T02	0.1	0.1	0	1.38501	8.07643	0	.	1	.	.	.	.	.	1.2903	3653.75	76.4087	17.3863	6.2e+08	1.4e+10	12.9711	1.4e+10	3668.8	3.9e+06	3.0e+09	91.3162	62.659	0.36913	6.2e+08	67.4	0.759788	.	8.07643	.	127	31	25.733	11.1097	0.536498	0.365682	0.355751	0.137927	2.31046	1.66819	1.38501
7	CRI	Costa Rica	哥斯达黎加	2000	D01T02	0.9	0.5	0.4	1.30342	8.26577	0	.	1	.	.	.	.	.	1.24314	3773.03	77.9317	17.0283	7.2e+08	1.5e+10	15.7084	1.5e+10	3789.05	4.0e+06	3.0e+09	81.5193	63.2587	0.41311	7.2e+08	68.4	0.721404	.	8.26577	.	47	28	25.445	9.24882	0.760438	0.616779	0.377571	0.155075	2.28244	1.75111	1.30342
7	CRI	Costa Rica	哥斯达黎加	2001	D01T02	0.8	0.5	0.3	1.28294	7.91816	0	.	1	.	.	.	.	.	1.33736	3941.6	79.3816	17.6191	6.2e+08	1.6e+10	18.4457	1.6e+10	3960.31	4.0e+06	3.2e+09	72.5455	63.789	0.39657	6.2e+08	67.6	0.71916	.	7.91816	.	191	21	25.2166	8.37954	0.808247	0.845938	0.380436	0.153278	2.26438	1.765	1.28294
7	CRI	Costa Rica	哥斯达黎加	2002	D01T02	0.6	0.4	0.1	1.28794	7.9559	0	.	1	.	.	.	.	.	1.33973	4021.43	80.7408	17.5391	7.2e+08	1.7e+10	21.1831	1.7e+10	4042.71	4.1e+06	3.3e+09	75.1079	64.3837	0.38003	7.2e+08	67.5	0.716917	0.218041	7.9559	.	220	23	24.5696	8.42775	0.814737	1.01664	0.369768	0.14683	2.21508	1.71986	1.28794
7	CRI	Costa Rica	哥斯达黎加	2003	D01T02	0.9	0.6	0.2	1.30653	7.99425	0	.	1	.	.	.	.	.	1.38409	4123.51	82.0331	17.1873	7.7e+08	1.7e+10	23.9204	1.7e+10	4147.82	4.2e+06	3.4e+09	79.6966	65.014	0.36349	7.7e+08	67	0.644508	0.355201	7.99425	131.603	238	33	24.1792	8.84008	0.71148	0.486552	0.374733	0.143303	2.21286	1.69369	1.30653
7	CRI	Costa Rica	哥斯达黎加	2004	D01T02	0.7	0.4	0.3	1.30038	8.43545	0	.	1	.	.	.	.	.	1.39755	4376.08	83.2902	15.4109	1.1e+09	1.9e+10	26.6577	1.9e+10	4404.71	4.2e+06	3.7e+09	78.2834	65.6327	0.37452	1.1e+09	66.4	0.55237	0.656767	8.43545	108.635	294	26	24.6691	8.85241	1.03354	0.074454	0.382748	0.144102	2.20621	1.69659	1.30038
7	CRI	Costa Rica	哥斯达黎加	2005	D01T02	1.2	0.6	0.6	1.2736	8.66597	0	.	1	.	.	.	.	.	1.45365	4643.46	84.5258	15.7391	1.5e+09	2.0e+10	29.395	2.0e+10	4676.38	4.3e+06	4.0e+09	84.0791	66.2099	0.40179	1.5e+09	66.1	0.55145	1.04067	8.66597	122.926	423	17	24.2695	8.62224	1.1682	0.487124	0.386209	0.151913	2.19677	1.72486	1.2736
7	CRI	Costa Rica	哥斯达黎加	2006	D01T02	1.4	0.8	0.6	1.24119	8.39206	0	.	1	.	.	.	.	.	1.49763	5188.36	85.7456	14.967	1.8e+09	2.3e+10	32.1323	2.3e+10	5227.47	4.3e+06	4.6e+09	86.9361	66.7545	0.42906	1.8e+09	65.9	0.499222	1.90324	8.39206	.	571	22	23.7199	8.42983	1.58637	0.609434	0.360459	0.154132	2.16104	1.74111	1.24119
7	CRI	Costa Rica	哥斯达黎加	2007	D01T02	2.8	1.2	1.6	1.22673	7.74352	0	.	1	.	.	.	.	.	1.71204	6055.09	86.9569	14.3199	2.2e+09	2.7e+10	34.8697	2.7e+10	6103.74	4.4e+06	6.0e+09	82.9059	67.236	0.35842	2.2e+09	64	0.506145	2.13963	7.74352	.	647	20	23.8938	7.91531	1.45732	0.575984	0.345246	0.157211	2.17261	1.77105	1.22673
7	CRI	Costa Rica	哥斯达黎加	2008	D01T02	3.3	1.4	1.9	1.15136	7.07601	0	.	1	.	.	.	.	.	1.66933	6841.91	88.1692	14.5096	2.4e+09	3.1e+10	37.607	3.1e+10	6901.39	4.5e+06	7.3e+09	80.7617	67.6615	0.38831	2.4e+09	64.2	0.512352	2.44205	7.07601	261.028	774	24	23.5536	6.97696	1.40821	0.843426	0.339679	0.185088	2.18924	1.90143	1.15136
7	CRI	Costa Rica	哥斯达黎加	2009	D01T02	2.5	1.4	1.1	1.19809	6.61009	0	.	1	.	.	.	.	.	1.57749	6737.86	89.3679	14.7102	1.6e+09	3.1e+10	40.3443	3.1e+10	6801.04	4.5e+06	6.5e+09	65.6319	68.0458	0.52028	1.6e+09	66.4	0.610301	4.00283	6.61009	339.546	507	16	23.5227	7.04963	0.736285	0.564266	0.305243	0.150709	2.18508	1.82381	1.19809
7	CRI	Costa Rica	哥斯达黎加	2010	D01T02	4.6	2.1	2.6	1.17219	6.37898	0	.	1	.	.	.	.	.	1.53722	8147.24	90.5259	14.5519	1.9e+09	3.8e+10	43.0816	3.8e+10	8227.13	4.6e+06	7.3e+09	61.1228	68.3909	0.48492	1.9e+09	65.9	0.622749	8.57292	6.37898	381.878	606	8	23.323	6.48519	1.14213	0.563621	0.29845	0.158401	2.17353	1.85424	1.17219
7	CRI	Costa Rica	哥斯达黎加	2011	D01T02	4.1	1.9	2.3	1.11713	6.04568	0	.	1	.	.	.	.	.	1.58772	9137.46	91.6554	14.392	2.7e+09	4.3e+10	45.8189	4.3e+10	9229.83	4.6e+06	8.3e+09	62.2693	68.6186	0.46782	2.7e+09	67.3	0.575052	8.96984	6.04568	406.209	610	13	22.5899	5.59987	1.47558	0.325379	0.316623	0.183309	2.19794	1.96748	1.11713
7	CRI	Costa Rica	哥斯达黎加	2012	D01T02	6.1	2.6	3.5	1.10506	6.05832	0	.	1	.	.	.	.	.	1.57212	9971.65	92.7652	14.7665	2.7e+09	4.7e+10	48.1086	4.7e+10	10075	4.7e+06	9.5e+09	61.4503	68.82	0.55606	2.7e+09	68	0.656075	9.47081	6.05832	337.244	578	9	22.2049	5.13084	2.33207	0.042161	0.320388	0.194383	2.2079	1.998	1.10506
7	CRI	Costa Rica	哥斯达黎加	2013	D01T02	6.8	3.4	3.4	1.0833	5.8862	0	.	1	.	.	.	.	.	1.62334	10633.3	93.8413	13.9891	3.2e+09	5.1e+10	49.0067	5.1e+10	10744.1	4.7e+06	1.0e+10	58.1103	68.9845	0.55567	3.2e+09	67	0.666596	10.1196	5.8862	355.116	580	18	21.345	4.78335	1.4628	0.036239	0.316607	0.18981	2.17533	2.00805	1.0833
7	CRI	Costa Rica	哥斯达黎加	2014	D01T02	13.7	6	7.7	1.09234	6.07224	0	.	1	.	.	.	.	.	1.61673	10737.7	94.8744	14.2087	3.2e+09	5.2e+10	52.2312	5.2e+10	10847.2	4.8e+06	1.0e+10	55.2883	69.1008	0.57209	3.2e+09	66.9	0.657193	10.6587	6.07224	568.462	529	15	20.6164	4.88788	1.6054	0.02979	0.325978	0.188278	2.16609	1.98299	1.09234
7	CRI	Costa Rica	哥斯达黎加	2015	D01T02	9.6	5.4	4.1	1.12071	5.37998	0	.	1	.	.	.	.	.	1.53984	11530	95.8723	.	3.0e+09	5.6e+10	53.0526	5.6e+10	11642.8	4.8e+06	1.1e+10	45.5247	69.1672	0.44993	3.0e+09	67.2	0.664692	11.4122	5.37998	495.276	582	17	19.9679	4.74911	1.21796	0.038275	0.296349	0.159872	2.13722	1.90701	1.12071
7	CRI	Costa Rica	哥斯达黎加	2016	D01T02	8.6	5.4	3.2	1.14592	5.46358	0	.	1	.	.	.	.	.	1.63399	11899.8	96.8509	.	2.6e+09	5.9e+10	53.6387	5.9e+10	12011.2	4.9e+06	1.1e+10	43.8714	69.1839	0.45645	2.6e+09	67.4	0.625356	12.9234	5.46358	525.376	497	9	19.65	4.91436	1.09215	0.033769	0.309614	0.153056	2.14062	1.86804	1.14592
7	CRI	Costa Rica	哥斯达黎加	2017	D01T02	12.4	6.6	5.8	1.11184	5.26373	0	.	1	.	.	.	.	.	1.65306	12118.1	97.8034	.	2.9e+09	6.1e+10	56.5279	6.1e+10	12225.6	4.9e+06	1.1e+10	45.5499	69.1721	0.44068	2.9e+09	65	0.557798	14.8992	5.26373	380.408	504	19	19.3145	4.69978	1.3346	0.03889	0.308266	0.17515	2.1423	1.9268	1.11184
7	CRI	Costa Rica	哥斯达黎加	2018	D01T02	13.8	7	6.8	1.09925	5.44224	0	.	1	.	.	.	.	.	1.66069	12383.1	98.7218	.	3.0e+09	6.2e+10	55.3101	6.2e+10	12468.6	5.0e+06	1.1e+10	47.5376	69.1254	0.38288	3.0e+09	65.6	0.586524	16.5608	5.44224	345.039	490	8	19.5581	4.48383	1.4349	0.032671	0.330208	0.187978	2.15087	1.95667	1.09925
8	CZE	Czech Republic	捷克	1995	D01T02	1	0.6	0.5	1.15796	1.12976	1	.	1	.	.	.	.	.	12.1213	5823.97	133.652	8.08106	2.6e+09	6.0e+10	20.5797	6.0e+10	5824.12	1.0e+07	2.0e+10	77.1774	68.134	0.79453	2.6e+09	67.8	0.956714	.	1.12976	.	2893	626	35.3855	4.03607	2.78263	4.26624	0.174548	0.173889	2.6185	2.26132	1.15796
8	CZE	Czech Republic	捷克	1996	D01T02	1.1	0.6	0.5	1.10504	0.83212	1	.	1	.	.	.	.	.	12.2867	6532.91	133.496	8.19049	1.4e+09	6.7e+10	21.5097	6.7e+10	6532.84	1.0e+07	2.3e+10	74.1455	68.4919	0.89446	1.4e+09	68.1	0.912233	.	0.83212	1252.43	3247	614	36.1452	3.89475	2.47235	4.529	0.14367	0.181482	2.54136	2.29979	1.10504
8	CZE	Czech Republic	捷克	1997	D01T02	0.6	0.4	0.3	1.06538	0.768442	1	.	1	.	.	.	.	.	12.1108	6034.52	133.352	7.91148	1.3e+09	6.2e+10	23.2416	6.2e+10	6034.49	1.0e+07	2.0e+10	79.5511	68.8141	0.99439	1.3e+09	68.8	0.867752	.	0.768442	1216.83	3661	579	35.6997	3.48925	2.23686	3.7564	0.142783	0.196677	2.50853	2.35458	1.06538
8	CZE	Czech Republic	捷克	1998	D01T02	0.5	0.3	0.2	1.1205	0.740613	1	.	1	.	.	.	.	.	11.552	6489.71	133.226	8.54999	3.7e+09	6.7e+10	23.7419	6.7e+10	6489.7	1.0e+07	2.1e+10	81.1212	69.1114	1.06528	3.7e+09	68.4	0.823271	.	0.740613	1217.25	3771	624	34.7893	3.50696	1.8163	2.97129	0.147775	0.180773	2.52183	2.25062	1.1205
8	CZE	Czech Republic	捷克	1999	D01T02	0.7	0.4	0.3	1.11982	0.846152	1	.	1	.	.	.	.	.	10.8856	6337.41	133.09	9.35899	6.3e+09	6.5e+10	25.4749	6.5e+10	6337.42	1.0e+07	2.0e+10	84.4198	69.4257	1.05452	6.3e+09	69.7	0.690633	.	0.846152	1313.26	4204	596	33.7712	3.2176	1.8914	2.8499	0.156648	0.186895	2.52829	2.25776	1.11982
8	CZE	Czech Republic	捷克	2000	D01T02	0.7	0.3	0.5	1.09108	0.805257	1	.	1	.	.	.	.	.	12.0104	6028.58	132.717	9.03252	5.0e+09	6.2e+10	28.3488	6.2e+10	6029.04	1.0e+07	1.9e+10	98.7705	69.7746	1.11319	5.0e+09	68.6	0.557994	0.024427	0.805257	1346.24	4384	555	33.4912	3.25053	1.85997	3.05448	0.166684	0.205004	2.48162	2.27445	1.09108
8	CZE	Czech Republic	捷克	2001	D01T02	1.7	0.9	0.8	1.09675	0.594389	1	.	1	.	.	.	.	.	12.012	6637.11	132.22	9.57106	5.6e+09	6.8e+10	29.9756	6.8e+10	6637.04	1.0e+07	2.1e+10	102.674	70.1854	1.10333	5.6e+09	70.2	0.735305	0.060604	0.594389	1459.16	4184	568	33.9092	3.20353	1.66518	3.00433	0.14889	0.19887	2.48959	2.26997	1.09675
8	CZE	Czech Republic	捷克	2002	D01T02	1.1	0.8	0.4	1.09084	0.537231	1	.	1	.	.	.	.	.	11.6239	8060.89	131.965	11.9722	8.5e+09	8.2e+10	34.4374	8.2e+10	8060.87	1.0e+07	2.5e+10	96.2918	70.5243	1.10202	8.5e+09	66.5	0.912616	0.149441	0.537231	1460.56	5031	526	33.2093	2.65959	1.40795	4.03845	0.141015	0.192305	2.49649	2.28858	1.09084
8	CZE	Czech Republic	捷克	2003	D01T02	1.1	0.7	0.5	1.07337	0.594406	1	.	1	.	.	.	.	.	12.0429	9818.57	131.927	15.5064	2.0e+09	1.0e+11	37.0082	1.0e+11	9818.57	1.0e+07	2.9e+10	100.339	70.8083	1.14741	2.0e+09	67.5	0.896275	0.338504	0.594406	1543.98	2954	625	32.3423	2.44003	1.69114	2.87676	0.150665	0.194926	2.48472	2.31487	1.07337
8	CZE	Czech Republic	捷克	2004	D01T02	1.4	0.5	0.9	1.06605	0.59148	1	.	1	.	.	.	.	.	12.1052	11749.9	131.984	15.5519	6.4e+09	1.2e+11	43.7342	1.2e+11	11749.9	1.0e+07	3.5e+10	115.974	71.0475	1.14559	6.4e+09	67	0.793517	2.29993	0.59148	1591.85	629	623	33.5797	2.41539	1.95618	2.7658	0.16913	0.215776	2.46622	2.31342	1.06605
8	CZE	Czech Republic	捷克	2005	D01T02	2.1	0.7	1.4	1.0931	0.813867	1	.	1	.	.	.	.	.	11.7513	13430.7	132.167	14.8696	1.4e+10	1.4e+11	48.3494	1.4e+11	13430.7	1.0e+07	4.0e+10	112.745	71.2248	1.16835	1.4e+10	64.6	0.87212	6.89742	0.813867	2356.08	244	586	33.6172	2.28464	1.62053	2.95425	0.202998	0.214666	2.46697	2.25687	1.0931
8	CZE	Czech Republic	捷克	2006	D01T02	1.9	0.8	1.1	1.08902	0.637239	1	.	1	.	.	.	.	.	11.7784	15261.8	132.542	15.3143	7.1e+09	1.6e+11	50.1367	1.6e+11	15261.8	1.0e+07	4.5e+10	120.386	71.1624	1.23173	7.1e+09	66.4	0.90843	10.7959	0.637239	2550.57	195	641	34.3332	2.16496	1.96341	2.76577	0.198309	0.224947	2.52784	2.32119	1.08902
8	CZE	Czech Republic	捷克	2007	D01T02	4.6	1.7	3	1.04442	0.66243	1	.	1	.	.	.	.	.	12.0038	18466.6	133.318	15.3211	1.4e+10	1.9e+11	54.1824	1.9e+11	18466.5	1.0e+07	5.7e+10	126.544	71.0904	1.30228	1.4e+10	67.4	0.856228	14.4781	0.66243	2691.55	192	716	34.1827	2.08891	1.90292	2.63056	0.20998	0.247226	2.5407	2.43264	1.04442
8	CZE	Czech Republic	捷克	2008	D01T02	5.9	2.1	3.8	1.00908	0.663714	1	.	1	.	.	.	.	.	11.3924	22804.6	134.446	15.9443	8.8e+09	2.4e+11	58.0695	2.4e+11	22804.6	1.0e+07	6.9e+10	121.967	70.9568	1.23933	8.8e+09	68.1	0.920679	16.954	0.663714	2857.02	142	712	33.6576	1.91993	1.88766	3.01207	0.203061	0.244877	2.44789	2.42586	1.00908
8	CZE	Czech Republic	捷克	2009	D01T02	4.9	2.2	2.7	0.976703	0.699154	1	.	1	.	.	.	.	.	10.644	19861.7	135.214	17.5232	5.3e+09	2.1e+11	61.0754	2.1e+11	19861.7	1.0e+07	5.7e+10	105.095	70.7032	1.29438	5.3e+09	69.4	0.913635	19.5376	0.699154	2742.08	92	789	32.9877	1.75679	1.73239	3.57894	0.204139	0.241863	2.36834	2.42483	0.976703
8	CZE	Czech Republic	捷克	2010	D01T02	9.3	3.5	5.9	0.948235	0.623714	1	.	1	.	.	.	.	.	10.7167	19960.1	135.626	17.3215	1.0e+10	2.1e+11	63.9459	2.1e+11	19960.1	1.0e+07	5.7e+10	124.185	70.3183	1.33688	1.0e+10	69.8	0.914982	21.6076	0.623714	2773.96	114	868	33.1708	1.5406	2.12469	3.68042	0.217455	0.2718	2.3782	2.50803	0.948235
8	CZE	Czech Republic	捷克	2011	D01T02	17.2	5.5	11.7	0.949972	0.671329	1	.	1	.	.	.	.	.	10.4013	21871.3	135.907	18.4405	4.2e+09	2.3e+11	65.57	2.3e+11	21871.3	1.0e+07	6.1e+10	137.245	69.7148	1.55571	4.2e+09	70.4	0.940435	23.9044	0.671329	2903.66	97	783	33.6506	1.98251	2.15955	3.78387	0.210308	0.266297	2.32711	2.44966	0.949972
8	CZE	Czech Republic	捷克	2012	D01T02	17.9	5.3	12.6	0.989477	0.728645	1	.	1	.	.	.	.	.	10.0919	19870.8	136.097	19.9385	9.4e+09	2.1e+11	65.6712	2.1e+11	19870.8	1.1e+07	5.5e+10	142.898	69.0541	1.78231	9.4e+09	69.9	0.88777	25.2779	0.728645	3139.24	150	867	32.9223	2.25119	2.31961	3.77861	0.231443	0.268737	2.34988	2.37487	0.989477
8	CZE	Czech Republic	捷克	2013	D01T02	22.2	6.3	15.9	0.989935	0.782003	1	.	1	.	.	.	.	.	9.62032	20133.2	136.16	20.7795	7.4e+09	2.1e+11	65.0858	2.1e+11	20133.2	1.1e+07	5.4e+10	144.806	68.3452	1.89973	7.4e+09	70.9	0.885865	27.164	0.782003	3237.24	97	984	32.6461	2.36477	2.17848	2.95781	0.238205	0.268899	2.35437	2.37831	0.989935
8	CZE	Czech Republic	捷克	2014	D01T02	25	7	18	0.98834	0.757669	1	.	1	.	.	.	.	.	9.26431	19890.9	136.303	20.8488	8.1e+09	2.1e+11	65.6241	2.1e+11	19890.9	1.1e+07	5.3e+10	157.27	67.6156	1.97285	8.1e+09	72.2	0.926698	28.4755	0.757669	3402.83	62	910	33.8394	2.41345	2.02977	2.65099	0.236055	0.265251	2.2851	2.31206	0.98834
8	CZE	Czech Republic	捷克	2015	D01T02	17.9	5.4	12.5	0.977657	0.771844	1	.	1	.	.	.	.	.	9.40074	17829.7	136.589	18.9566	1.7e+09	1.9e+11	64.4816	1.9e+11	17829.7	1.1e+07	5.0e+10	159.143	66.8908	1.92923	1.7e+09	72.5	0.95819	27.9996	0.771844	3592.07	72	880	33.7818	2.21121	1.57529	2.94062	0.237508	0.272475	2.30128	2.35387	0.977657
8	CZE	Czech Republic	捷克	2016	D01T02	19.4	5.6	13.8	0.999342	0.704847	1	.	1	.	.	.	.	.	9.62775	18575.2	136.852	.	1.1e+10	2.0e+11	63.7481	2.0e+11	18575.2	1.1e+07	4.9e+10	155.769	66.2722	1.68015	1.1e+10	73.2	0.932714	29.1612	0.704847	3516.17	47	792	33.4093	2.08705	1.32253	1.87099	0.24072	0.265969	2.33217	2.3337	0.999342
8	CZE	Czech Republic	捷克	2017	D01T02	25	6.5	18.5	1.02973	0.661762	1	.	1	.	.	.	.	.	9.61182	20636.2	137.216	.	1.1e+10	2.2e+11	64.0787	2.2e+11	20636.2	1.1e+07	5.5e+10	158.028	65.6179	1.79079	1.1e+10	73.3	0.982286	29.8737	0.661762	3682.03	66	794	32.7083	2.05761	1.47533	1.79182	0.240666	0.261279	2.39908	2.32981	1.02973
8	CZE	Czech Republic	捷克	2018	D01T02	38.1	8.3	29.8	1.06746	0.642446	1	.	1	.	.	.	.	.	9.49204	23424.5	137.676	.	8.3e+09	2.5e+11	63.7688	2.5e+11	23419.7	1.1e+07	6.6e+10	155.411	64.9925	1.93017	8.3e+09	74.2	0.951259	30.5929	0.642446	3862.68	54	678	31.7709	1.93625	1.37185	1.93349	0.249157	0.259764	2.49692	2.33912	1.06746
9	DNK	Denmark	丹麦	1995	D01T02	28.9	15.2	13.7	1.12052	1.08093	1	.	1	.	.	.	.	.	11.4647	35351.6	130.834	1.6101	4.1e+09	1.9e+11	45.4468	1.9e+11	35351.4	5.2e+06	3.6e+10	52.3467	67.3941	1.7242	4.1e+09	67.1	1.7441	.	1.08093	.	250	1234	22.0926	2.8519	1.23563	2.58348	0.193183	0.152239	2.29846	2.05125	1.12052
9	DNK	Denmark	丹麦	1996	D01T02	9.5	5.3	4.2	1.12704	1.06992	1	.	1	.	.	.	.	.	13.9356	35650.9	131.577	1.36035	7.7e+08	1.9e+11	47.7991	1.9e+11	35650.7	5.3e+06	3.7e+10	51.5402	67.236	1.80667	7.7e+08	67.3	1.76258	.	1.06992	3177.82	196	1309	22.2882	2.7927	0.946329	4.2902	0.194632	0.150506	2.28809	2.03018	1.12704
9	DNK	Denmark	丹麦	1997	D01T02	20.8	12	8.8	1.09422	1.02308	1	.	1	.	.	.	.	.	12.0432	32836.1	132.125	1.88182	2.8e+09	1.7e+11	50.1271	1.7e+11	32835.9	5.3e+06	3.6e+10	54.2678	67.0847	1.88914	2.8e+09	67.5	1.78106	.	1.02308	3317.92	218	1319	22.4527	2.63712	0.98699	3.74553	0.19579	0.164249	2.268	2.0727	1.09422
9	DNK	Denmark	丹麦	1998	D01T02	42.5	23.5	19	1.05551	0.975959	1	.	1	.	.	.	.	.	11.2571	33368	132.605	2.28073	6.7e+09	1.8e+11	52.455	1.8e+11	33368.1	5.3e+06	3.8e+10	54.1754	66.9359	2.00619	6.7e+09	67.5	1.79953	.	0.975959	.	166	1543	22.326	2.1446	0.943038	2.74678	0.194772	0.179162	2.27759	2.15782	1.05551
9	DNK	Denmark	丹麦	1999	D01T02	68.3	35.4	32.9	1.04081	0.93545	1	.	1	.	.	.	.	.	10.6596	33440.6	133.045	2.68271	1.7e+10	1.8e+11	55.8192	1.8e+11	33440.8	5.3e+06	3.7e+10	53.9707	66.7969	2.12764	1.7e+10	68.1	1.81883	.	0.93545	3559.9	131	1656	22.6383	1.94099	0.895359	3.76647	0.192226	0.177186	2.27122	2.18216	1.04081
9	DNK	Denmark	丹麦	2000	D01T02	57.6	26.9	30.7	1.07854	0.967238	1	.	1	.	.	.	.	.	9.85123	30743.4	133.49	3.51788	3.6e+10	1.6e+11	57.2183	1.6e+11	30743.5	5.3e+06	3.5e+10	58.9972	66.6768	2.22615	3.6e+10	68.3	1.83812	1.25453	0.967238	.	140	1730	23.6527	2.15185	1.01905	7.01146	0.204857	0.176005	2.28577	2.11933	1.07854
9	DNK	Denmark	丹麦	2001	D01T02	46.6	22.3	24.3	1.11212	0.905494	1	.	1	.	.	.	.	.	10.1227	30751.6	133.97	3.47674	9.3e+09	1.6e+11	59.9979	1.7e+11	30751.7	5.4e+06	3.5e+10	58.8787	66.5599	2.32466	9.3e+09	68.3	1.85203	4.43968	0.905494	3630.6	188	1757	22.8907	2.33951	1.03892	5.72402	0.2031	0.16619	2.28336	2.05316	1.11212
9	DNK	Denmark	丹麦	2002	D01T02	50.9	26.5	24.5	1.00756	0.870857	1	.	1	.	.	.	.	.	10.0149	33228.6	134.398	3.75657	4.4e+09	1.8e+11	63.5084	1.8e+11	33228.7	5.4e+06	3.7e+10	60.3549	66.4429	2.44145	4.4e+09	71.1	1.86595	8.39045	0.870857	4754.86	169	1815	22.6557	1.78112	1.09364	6.18039	0.195899	0.204828	2.26709	2.25007	1.00756
9	DNK	Denmark	丹麦	2003	D01T02	57.2	28	29.1	0.991403	0.903007	1	.	1	.	.	.	.	.	10.9884	40458.9	134.764	3.5774	1.2e+09	2.2e+11	67.5043	2.2e+11	40458.8	5.4e+06	4.5e+10	56.8286	66.3313	2.51085	1.2e+09	73.2	1.85144	13.3108	0.903007	4618.92	153	1772	22.163	1.61079	1.26763	6.5528	0.192231	0.20693	2.24789	2.26739	0.991403
9	DNK	Denmark	丹麦	2004	D01T02	58.8	24.9	33.9	1.00116	0.873668	1	.	1	.	.	.	.	.	9.94117	46511.9	135.113	4.45037	-8800000000	2.5e+11	74.395	2.5e+11	46511.6	5.4e+06	5.2e+10	57.7771	66.2257	2.41916	-8800000000	72.4	1.88971	18.7901	0.873668	4843.25	138	1877	22.1296	1.62253	1.42599	7.84722	0.186966	0.208812	2.24932	2.24672	1.00116
9	DNK	Denmark	丹麦	2005	D01T02	76.1	29.7	46.4	0.847754	1.37452	1	.	1	.	.	.	.	.	9.26328	48799.7	135.486	5.08061	1.3e+10	2.6e+11	80.3745	2.7e+11	48799.8	5.4e+06	5.6e+10	60.7644	66.1193	2.39337	1.3e+10	75.3	1.80358	24.72	1.37452	5197.45	165	1658	22.2395	1.14564	1.28684	9.64492	0.214763	0.242276	2.09061	2.46606	0.847754
9	DNK	Denmark	丹麦	2006	D01T02	90.8	32.7	58.2	0.85363	1.38825	1	.	1	.	.	.	.	.	10.6917	52027.2	135.932	3.9762	2.4e+09	2.8e+11	79.0196	2.8e+11	52027	5.4e+06	6.6e+10	62.9461	65.9768	2.403	2.4e+09	75.4	1.85279	31.7948	1.38825	5298.45	188	1503	22.8196	1.16519	1.45919	10.0941	0.224723	0.248195	2.09507	2.4543	0.85363
9	DNK	Denmark	丹麦	2007	D01T02	114	37.7	76.4	0.826311	1.28628	1	.	1	.	.	.	.	.	9.77971	58487	136.536	4.86686	1.2e+10	3.2e+11	78.5522	3.2e+11	58487.1	5.5e+06	7.5e+10	62.9879	65.8365	2.51541	1.2e+10	77	1.88905	34.7379	1.28628	5516.36	197	1660	22.1667	1.17442	1.80494	8.46335	0.218692	0.256174	2.06891	2.50379	0.826311
9	DNK	Denmark	丹麦	2008	D01T02	193.9	64.3	129.7	0.794657	1.2279	1	.	1	.	.	.	.	.	9.12467	64321.7	137.341	5.2044	2.2e+09	3.5e+11	75.6821	3.5e+11	64322.1	5.5e+06	8.1e+10	64.0379	65.6919	2.77346	2.2e+09	79.2	1.848	36.4487	1.2279	6493.9	195	1634	22.5939	0.857791	1.71277	9.62181	0.250573	0.307131	2.1789	2.74194	0.794657
9	DNK	Denmark	丹麦	2009	D01T02	149.4	49.9	99.5	0.760977	1.34787	1	.	1	.	.	.	.	.	8.67872	58163.6	138.077	5.09481	3.8e+09	3.2e+11	74.2838	3.2e+11	58163.3	5.5e+06	6.5e+10	55.1352	65.5404	3.05514	3.8e+09	79.6	1.83736	36.6005	1.34787	6656.97	131	1518	19.9502	0.833589	1.2871	7.63372	0.231373	0.277782	2.03706	2.6769	0.760977
9	DNK	Denmark	丹麦	2010	D01T02	204.4	71.4	133	0.811814	1.47685	1	.	1	.	.	.	.	.	8.67474	58041.4	138.692	4.99499	-12000000000	3.2e+11	73.5967	3.2e+11	58041.4	5.5e+06	5.8e+10	55.7437	65.3826	2.91707	-12000000000	77.9	1.8021	38.0556	1.47685	6739.18	142	1626	19.7049	1.20191	1.62457	8.07067	0.24533	0.253306	2.00544	2.47032	0.811814
9	DNK	Denmark	丹麦	2011	D01T02	250.5	83.9	166.5	0.836441	1.48194	1	.	1	.	.	.	.	.	7.73671	61753.6	139.264	6.63367	1.4e+10	3.4e+11	76.7583	3.4e+11	61753.6	5.6e+06	6.3e+10	60.3271	65.1572	2.94465	1.4e+10	78.6	1.8309	38.4369	1.48194	7017.94	197	1574	20.2547	1.31213	1.65076	8.90717	0.26419	0.267567	2.08954	2.49813	0.836441
9	DNK	Denmark	丹麦	2012	D01T02	348	112.7	235.4	0.876241	1.62779	1	.	1	.	.	.	.	.	6.83459	58507.5	139.789	7.85953	-16000000000	3.3e+11	79.1083	3.3e+11	58507.5	5.6e+06	6.1e+10	60.3377	64.9419	2.98125	-16000000000	76.2	1.77256	38.9138	1.62779	7143.29	229	1406	20.3979	1.65473	1.43421	9.3604	0.261488	0.245107	2.06831	2.36044	0.876241
9	DNK	Denmark	丹麦	2013	D01T02	384.6	115	269.6	0.873708	1.48705	1	.	1	.	.	.	.	.	7.11684	61191.2	140.373	7.65236	6.8e+08	3.4e+11	80.931	3.4e+11	61191.2	5.6e+06	6.6e+10	60.6247	64.6887	2.97048	6.8e+08	76.1	1.78889	40.3955	1.48705	7071.14	193	1341	20.0618	1.30213	1.29962	8.57392	0.269764	0.254512	2.19618	2.51363	0.873708
9	DNK	Denmark	丹麦	2014	D01T02	500.7	142.5	358.2	0.859789	1.39865	1	.	1	.	.	.	.	.	6.34708	62549	141.087	9.89183	6.6e+09	3.5e+11	81.0291	3.5e+11	62549	5.6e+06	6.8e+10	59.7929	64.397	2.91409	6.6e+09	76.1	1.72101	41.4423	1.39865	7310.66	206	1377	19.785	1.38246	1.51389	6.55193	0.249856	0.245225	2.0808	2.42013	0.859789
9	DNK	Denmark	丹麦	2015	D01T02	511.3	130.8	380.5	0.838577	1.3769	1	.	1	.	.	.	.	.	5.92865	53254.9	142.087	11.7489	1.9e+09	3.0e+11	82.1295	3.0e+11	53254.9	5.7e+06	6.0e+10	59.8269	64.1094	3.05497	1.9e+09	76.3	1.7144	42.3573	1.3769	7528.26	270	1462	19.9875	0.95758	1.30256	4.82598	0.280936	0.279886	2.20506	2.62952	0.838577
9	DNK	Denmark	丹麦	2016	D01T02	448.3	131.9	316.4	0.814743	1.25471	1	.	1	.	.	.	.	.	6.16649	54664	143.2	.	7.8e+09	3.1e+11	81.0567	3.1e+11	54664	5.7e+06	6.6e+10	57.7546	63.9803	3.09283	7.8e+09	75.3	1.66729	43.1306	1.25471	7846.66	298	1552	20.6686	0.961161	1.30427	3.52193	0.266244	0.269225	2.09421	2.5704	0.814743
9	DNK	Denmark	丹麦	2017	D01T02	441.9	144.2	297.8	0.902677	1.43605	1	.	1	.	.	.	.	.	5.74715	57610.1	144.125	.	3.6e+09	3.3e+11	80.616	3.3e+11	57610.1	5.8e+06	7.1e+10	58.8529	63.8488	3.05015	3.6e+09	75.1	1.64321	43.7815	1.43605	7669.91	282	1490	20.7432	1.3048	1.48229	3.95928	0.272699	0.225681	2.09143	2.31692	0.902677
9	DNK	Denmark	丹麦	2018	D01T02	339.9	117.8	222	0.813266	1.42875	1	.	1	.	.	.	.	.	5.71855	61591.9	144.841	.	8.8e+09	3.6e+11	81.1834	3.6e+11	61591.9	5.8e+06	7.8e+10	59.4987	63.7288	3.03292	8.8e+09	76.6	1.68345	43.9751	1.42875	7636.13	239	1262	20.8245	1.02657	1.51916	4.31161	0.279721	0.270508	2.04571	2.51543	0.813266
10	EST	Estonia	爱沙尼亚	1995	D01T02	0	0	0	1.05132	1.7037	0	.	1	.	.	.	.	.	11.3169	3134.39	33.8909	0.028474	2.1e+08	4.5e+09	25.4499	4.5e+09	3134.39	1.4e+06	1.2e+09	97.4024	65.7824	0.23388	2.1e+08	65.2	0.741027	.	1.7037	.	63	16	27.3815	4.13064	3.09674	7.07357	0.296894	0.319484	2.78029	2.64456	1.05132
10	EST	Estonia	爱沙尼亚	1996	D01T02	0	0	0	1.04541	1.52088	0	.	1	.	.	.	.	.	12.1495	3380.93	33.3945	0.017609	1.7e+08	4.8e+09	40.1861	4.8e+09	3380.93	1.4e+06	1.3e+09	110.781	66.1365	0.34453	1.7e+08	65.4	0.76148	.	1.52088	.	198	12	26.5585	4.12813	2.37431	6.39286	0.256678	0.295862	2.62007	2.50626	1.04541
10	EST	Estonia	爱沙尼亚	1997	D01T02	0.1	0	0	1.09155	1.51276	0	.	1	.	.	.	.	.	11.984	3682.95	33.0157	0.019661	2.7e+08	5.2e+09	44.0633	5.2e+09	3682.95	1.4e+06	1.5e+09	143.042	66.4644	0.45518	2.7e+08	69.1	0.781933	.	1.51276	.	360	15	26.1109	4.08874	3.08422	6.33594	0.29587	0.309272	2.6472	2.42517	1.09155
10	EST	Estonia	爱沙尼亚	1998	D01T02	0.1	0.1	0	1.24162	1.66313	0	.	1	.	.	.	.	.	11.7141	4093.39	32.7001	0.026855	6.0e+08	5.7e+09	47.3213	5.7e+09	4093.39	1.4e+06	1.8e+09	141.556	66.7692	0.56583	6.0e+08	72.5	0.802387	.	1.66313	2117.54	443	20	25.2371	5.05183	3.27741	3.71615	0.348343	0.274167	2.77073	2.23155	1.24162
10	EST	Estonia	爱沙尼亚	1999	D01T02	0.1	0.1	0	1.18472	1.65848	0	.	1	.	.	.	.	.	11.0014	4140.94	32.7965	0.040892	3.3e+08	5.8e+09	49.6148	5.8e+09	4140.94	1.4e+06	1.5e+09	123.782	67.078	0.67648	3.3e+08	73.8	0.852076	.	1.65848	2138.5	604	13	23.8432	3.62815	4.96575	4.52333	0.358591	0.288325	2.77239	2.34013	1.18472
10	EST	Estonia	爱沙尼亚	2000	D01T02	0.1	0.1	0	1.15741	1.4575	0	.	1	.	.	.	.	.	10.6776	4070.61	32.9555	0.029916	4.2e+08	5.7e+09	54.5441	5.7e+09	4070.61	1.4e+06	1.5e+09	156.192	67.3993	0.59921	4.2e+08	69.9	0.901766	.	1.4575	1905.49	791	13	24.8827	3.88501	5.49783	4.49531	0.283464	0.248603	2.71395	2.34486	1.15741
10	EST	Estonia	爱沙尼亚	2001	D01T02	0.1	0.1	0	1.08928	1.21721	0	.	1	.	.	.	.	.	11.0827	4505.86	32.7463	0.032365	5.9e+08	6.3e+09	58.6614	6.3e+09	4505.86	1.4e+06	1.7e+09	147.81	67.5472	0.69788	5.9e+08	76.1	0.925213	1.25894	1.21721	1926.38	699	18	25.5186	3.49397	2.79898	3.91046	0.255282	0.268961	2.62793	2.41255	1.08928
10	EST	Estonia	爱沙尼亚	2002	D01T02	0.3	0.2	0.1	1.16658	1.22478	0	.	1	.	.	.	.	.	10.8404	5341.63	32.5395	0.024902	3.4e+08	7.4e+09	61.5372	7.4e+09	5341.63	1.4e+06	2.3e+09	138.423	67.686	0.7116	3.4e+08	77.6	0.94866	3.37142	1.22478	2212.29	700	19	25.4902	3.55352	2.13508	5.31993	0.280311	0.263427	2.73416	2.34375	1.16658
10	EST	Estonia	爱沙尼亚	2003	D01T02	0.4	0.3	0.2	1.16229	1.18928	0	.	1	.	.	.	.	.	12.3572	7203.52	32.3359	0.034196	1.0e+09	9.9e+09	64.3991	9.9e+09	7203.52	1.4e+06	3.2e+09	137.624	67.8293	0.76437	1.0e+09	77.7	0.988123	6.58807	1.18928	2197.52	584	18	26.1126	3.46019	2.34375	4.23761	0.288394	0.258136	2.67537	2.30182	1.16229
10	EST	Estonia	爱沙尼亚	2004	D01T02	0.3	0.1	0.1	1.24689	1.02833	0	.	1	.	.	.	.	.	12.4936	8914.1	32.1432	0.042076	1.1e+09	1.2e+10	66.1838	1.2e+10	8914.1	1.4e+06	3.9e+09	117.472	67.9689	0.84595	1.1e+09	77.4	0.992087	10.1783	1.02833	2470.73	97	27	25.4317	3.6195	2.42264	4.57625	0.284273	0.24146	2.77619	2.2265	1.24689
10	EST	Estonia	爱沙尼亚	2005	D01T02	0.7	0.3	0.4	1.21582	1.18865	0	.	1	.	.	.	.	.	12.72	10412.6	31.9598	0.114852	3.1e+09	1.4e+10	67.9128	1.4e+10	10412.6	1.4e+06	4.6e+09	127.272	68.0882	0.9176	3.1e+09	75.2	0.97622	13.2284	1.18865	2457.13	15	23	26.2603	3.28731	2.40669	7.24165	0.305949	0.250442	2.71679	2.23453	1.21582
10	EST	Estonia	爱沙尼亚	2006	D01T02	0.3	0.2	0.1	1.19475	1.31968	0	.	1	.	.	.	.	.	11.868	12639.4	31.7719	0.146564	1.8e+09	1.7e+10	67.8659	1.7e+10	12639.4	1.3e+06	6.3e+09	135.941	67.9984	1.11346	1.8e+09	74.9	1.06949	18.3262	1.31968	2603.45	9	36	26.9475	3.14434	3.06964	15.5474	0.306622	0.248288	2.59559	2.1725	1.19475
10	EST	Estonia	爱沙尼亚	2007	D01T02	0.3	0.2	0.2	1.26769	1.24275	0	.	1	.	.	.	.	.	14.9045	16744.6	31.6273	0.129049	3.0e+09	2.2e+10	67.6747	2.3e+10	16744.6	1.3e+06	8.2e+09	118.878	67.9179	1.05891	3.0e+09	78	1.04674	19.7638	1.24275	2744.93	19	44	26.8824	3.92554	3.52696	4.3306	0.317472	0.212861	2.5485	2.01035	1.26769
10	EST	Estonia	爱沙尼亚	2008	D01T02	0.4	0.2	0.2	1.30784	1.09682	0	.	1	.	.	.	.	.	13.7598	18205	31.5426	0.202728	2.0e+09	2.4e+10	66.4418	2.4e+10	18205	1.3e+06	7.6e+09	117.017	67.8012	1.25036	2.0e+09	77.9	1.07224	22.0387	1.09682	2969.24	10	62	26.2193	3.40144	4.54684	5.68918	0.351162	0.233478	2.82199	2.15774	1.30784
10	EST	Estonia	爱沙尼亚	2009	D01T02	0.3	0.2	0.1	1.13038	0.954535	0	.	1	.	.	.	.	.	11.2746	14711.7	31.4818	0.339458	1.9e+09	2.0e+10	66.6319	2.0e+10	14711.7	1.3e+06	4.5e+09	97.7333	67.6123	1.38894	1.9e+09	76.4	1.03241	23.5004	0.954535	3228.72	20	76	23.475	2.47117	2.57266	7.55377	0.302496	0.245825	2.54642	2.25272	1.13038
10	EST	Estonia	爱沙尼亚	2010	D01T02	0.5	0.3	0.2	1.18397	1.27702	0	.	1	.	.	.	.	.	14.2676	14663	31.4101	0.296589	2.6e+09	2.0e+10	68.1845	2.0e+10	14663	1.3e+06	4.2e+09	122.304	67.3428	1.56628	2.6e+09	74.7	1.06634	26.1265	1.27702	3060.58	13	84	24.4012	3.17107	2.94613	15.7557	0.372332	0.257455	2.64896	2.23735	1.18397
10	EST	Estonia	爱沙尼亚	2011	D01T02	1.5	0.5	1	1.23652	1.34305	0	.	1	.	.	.	.	.	13.6886	17487.8	31.3149	0.349119	1.1e+09	2.3e+10	70.3691	2.3e+10	17464.9	1.3e+06	6.1e+09	147.38	66.922	2.28473	1.1e+09	75.2	1.0748	26.2874	1.34305	3397.58	15	62	25.7224	3.67987	2.61791	16.7594	0.40915	0.25561	2.71008	2.1917	1.23652
10	EST	Estonia	爱沙尼亚	2012	D01T02	3.9	1.2	2.7	1.15305	1.39496	0	.	1	.	.	.	.	.	12.7669	17403.2	31.203	0.461627	1.8e+09	2.3e+10	72.3751	2.3e+10	17404.2	1.3e+06	6.6e+09	148.442	66.4866	2.10903	1.8e+09	73.2	1.06219	26.4241	1.39496	3462.92	5	20	25.2664	3.31546	2.68309	16.1289	0.388889	0.271149	2.61164	2.26499	1.15305
10	EST	Estonia	爱沙尼亚	2013	D01T02	8.4	1.8	6.7	1.15189	1.32609	0	.	1	.	.	.	.	.	14.656	19056	30.3197	0.47377	1.1e+09	2.5e+10	73.9212	2.5e+10	19050.6	1.3e+06	7.0e+09	138.534	66.0306	1.71302	1.1e+09	75.3	1.11244	27.3864	1.32609	3341.01	17	25	25.35	3.08811	2.15486	10.2328	0.397436	0.284269	2.68503	2.33098	1.15189
10	EST	Estonia	爱沙尼亚	2014	D01T02	13.6	2.9	10.7	1.18104	1.15297	0	.	1	.	.	.	.	.	13.6469	20261.1	30.2403	0.617871	1.8e+09	2.7e+10	73.3078	2.7e+10	20234.1	1.3e+06	6.8e+09	129.097	65.5504	1.42089	1.8e+09	75.9	1.22003	28.2238	1.15297	3284.26	6	44	24.7727	3.16427	1.90385	11.0752	0.38042	0.26629	2.65044	2.24416	1.18104
10	EST	Estonia	爱沙尼亚	2015	D01T02	7.5	2	5.5	1.08995	1.27614	0	.	1	.	.	.	.	.	11.8125	17402	30.2601	0.933237	-720000000	2.3e+10	72.1676	2.3e+10	17395	1.3e+06	5.6e+09	119.559	65.0475	1.45685	-720000000	76.8	1.19506	29.6865	1.27614	3183.24	6	30	23.8633	2.85805	1.6365	10.962	0.362679	0.286792	2.59107	2.37725	1.08995
10	EST	Estonia	爱沙尼亚	2016	D01T02	12.6	2.4	10.2	1.10481	1.21124	0	.	1	.	.	.	.	.	12.1528	18295.3	30.2689	.	9.3e+08	2.4e+10	71.3905	2.4e+10	18282.9	1.3e+06	5.9e+09	116.933	64.8112	1.24617	9.3e+08	77.2	1.19493	31.4971	1.21124	3295.08	1	29	24.0475	2.11361	1.66619	8.25731	0.416191	0.314436	2.76619	2.50377	1.10481
10	EST	Estonia	爱沙尼亚	2017	D01T02	22.3	3.1	19.2	1.15295	1.08337	0	.	1	.	.	.	.	.	12.6825	20437.8	30.816	.	1.7e+09	2.7e+10	69.0459	2.7e+10	20387.3	1.3e+06	6.9e+09	116.29	64.4649	1.27996	1.7e+09	79.1	1.18977	32.5189	1.08337	3542.55	4	37	23.9989	2.38621	2.35841	9.90909	0.406661	0.297787	2.80975	2.43702	1.15295
10	EST	Estonia	爱沙尼亚	2018	D01T02	12.4	2.2	10.2	1.22774	1.12527	0	.	1	.	.	.	.	.	11.592	23165.8	30.9234	.	1.2e+09	3.0e+10	70.3654	3.1e+10	23052.3	1.3e+06	7.5e+09	118.646	64.0166	1.40441	1.2e+09	78.8	1.21909	33.3679	1.12527	3755.33	6	24	24.0242	2.0894	2.75087	6.25246	0.434413	0.282358	2.96506	2.41506	1.22774
11	FIN	Finland	芬兰	1995	D01T02	1.9	1	0.9	1.50327	0.338274	1	.	1	.	.	.	.	.	10.9818	26271.6	16.7694	21.2572	1.5e+09	1.3e+11	67.4003	1.3e+11	26271.6	5.1e+06	2.6e+10	52.1351	66.7043	2.28354	1.5e+09	62.2	1.65876	.	0.338274	.	1733	2058	29.4909	3.7971	3.06255	1.89048	0.263196	0.106931	2.81732	1.87413	1.50327
11	FIN	Finland	芬兰	1996	D01T02	4.9	2.7	2.2	1.48403	0.491279	1	.	1	.	.	.	.	.	12.2107	25783.5	16.8245	19.5394	7.5e+08	1.3e+11	70.3355	1.3e+11	25783.5	5.1e+06	2.7e+10	54.9054	66.6064	2.45256	7.5e+08	63.7	1.71965	.	0.491279	.	483	2179	28.8403	3.44915	3.1028	3.06513	0.257319	0.116988	2.85309	1.92253	1.48403
11	FIN	Finland	芬兰	1997	D01T02	5.8	3.3	2.5	1.56221	0.415833	1	.	1	.	.	.	.	.	11.7949	24691.9	16.8746	20.2711	2.5e+09	1.3e+11	73.394	1.3e+11	24691.9	5.1e+06	2.7e+10	57.5847	66.6401	2.62158	2.5e+09	65.2	1.78055	.	0.415833	.	250	2355	29.027	3.42307	3.56423	2.31871	0.284317	0.117377	2.96914	1.90061	1.56221
11	FIN	Finland	芬兰	1998	D01T02	14	7.7	6.3	1.56544	0.269991	1	.	1	.	.	.	.	.	11.112	26009.3	16.9195	21.676	1.3e+10	1.3e+11	79.1726	1.3e+11	26009.3	5.2e+06	3.0e+10	57.2312	66.7462	2.78442	1.3e+10	63.5	1.84144	.	0.269991	.	212	2471	30.5294	2.89938	2.76316	1.86173	0.284243	0.120785	3.03337	1.93771	1.56544
11	FIN	Finland	芬兰	1999	D01T02	10.6	5.7	4.9	1.55284	0.267017	1	.	1	.	.	.	.	.	10.9399	26186.2	16.9588	22.1574	7.8e+09	1.4e+11	81.382	1.4e+11	26177.3	5.2e+06	3.0e+10	54.9903	66.8377	3.05619	7.8e+09	63.9	1.89651	.	0.267017	.	343	2511	30.4359	2.88616	2.92279	2.41365	0.278351	0.116583	2.93994	1.89326	1.55284
11	FIN	Finland	芬兰	2000	D01T02	13.3	6.8	6.5	1.51415	0.312433	1	.	1	.	.	.	.	.	10.6444	24345.9	16.994	22.5049	1.4e+10	1.3e+11	82.3296	1.3e+11	24285.5	5.2e+06	2.9e+10	64.0738	66.8701	3.24138	1.4e+10	64.3	1.95157	0.676171	0.312433	.	324	2579	31.59	2.95364	3.11698	3.43832	0.264894	0.129072	2.84817	1.88104	1.51415
11	FIN	Finland	芬兰	2001	D01T02	14.4	7.4	7	1.43512	0.374069	1	.	1	.	.	.	.	.	11.7749	24967.8	17.0328	21.6324	3.2e+09	1.3e+11	84.316	1.3e+11	24946.2	5.2e+06	3.0e+10	58.6273	66.9139	3.19372	3.2e+09	69.7	1.95111	2.58288	0.374069	.	270	2390	30.9463	2.76433	2.90224	3.14944	0.243188	0.126191	2.70235	1.88302	1.43512
11	FIN	Finland	芬兰	2002	D01T02	17.3	9	8.3	1.40493	0.30357	1	.	1	.	.	.	.	.	12.1985	26997.8	17.0741	19.6487	8.1e+09	1.4e+11	84.84	1.4e+11	26869.7	5.2e+06	3.0e+10	56.794	66.8597	3.25308	8.1e+09	73.6	1.95064	5.25901	0.30357	.	207	2162	30.1099	2.67231	2.88067	3.30941	0.232024	0.126392	2.66286	1.89536	1.40493
11	FIN	Finland	芬兰	2003	D01T02	21	10.8	10.2	1.37861	0.294066	1	.	1	.	.	.	.	.	13.7556	32927.7	17.1149	18.4552	6.0e+09	1.7e+11	86.944	1.7e+11	32855.1	5.2e+06	3.7e+10	55.866	66.7541	3.29822	6.0e+09	73.7	1.96957	9.4207	0.294066	.	215	1972	29.529	2.53577	2.83066	3.94683	0.228272	0.13472	2.66878	1.93585	1.37861
11	FIN	Finland	芬兰	2004	D01T02	24.4	10.7	13.7	1.35255	0.265498	1	.	1	.	.	.	.	.	12.9458	37772.2	17.1646	19.5261	6.8e+09	2.0e+11	89.5175	2.0e+11	37702.8	5.2e+06	4.4e+10	57.3076	66.6702	3.30907	6.8e+09	73.4	1.96012	15.3018	0.265498	7821.86	209	2011	29.373	2.37972	3.48208	4.27022	0.229368	0.143928	2.67289	1.97618	1.35255
11	FIN	Finland	芬兰	2005	D01T02	35.6	13.6	22	1.29036	0.338545	1	.	1	.	.	.	.	.	10.5717	39054.9	17.2235	21.9729	1.1e+10	2.0e+11	91.6795	2.1e+11	39040.3	5.2e+06	4.7e+10	60.6731	66.6337	3.3237	1.1e+10	71	1.89386	22.3825	0.338545	7526.63	229	1830	29.2519	2.27826	3.47465	4.36052	0.219058	0.162616	2.59178	2.00857	1.29036
11	FIN	Finland	芬兰	2006	D01T02	34.2	12.1	22.1	1.25349	0.279947	1	.	1	.	.	.	.	.	12.7272	41222.6	17.317	19.0283	4.6e+09	2.2e+11	93.1574	2.2e+11	41188.1	5.3e+06	4.9e+10	67.5776	66.6038	3.33215	4.6e+09	72.9	1.86767	27.1351	0.279947	7657.22	202	1816	30.2411	2.00119	4.93577	5.19188	0.216417	0.175037	2.62402	2.09337	1.25349
11	FIN	Finland	芬兰	2007	D01T02	39.8	12.8	27	1.35832	0.303857	1	.	1	.	.	.	.	.	12.3097	48476.4	17.392	20.4422	2.2e+10	2.6e+11	93.7591	2.6e+11	48414.8	5.3e+06	6.2e+10	67.0679	66.6244	3.33704	2.2e+10	74	1.79772	30.5747	0.303857	7361.54	211	1804	30.67	2.38037	5.21295	5.35882	0.248778	0.155399	2.6915	1.98149	1.35832
11	FIN	Finland	芬兰	2008	D01T02	36	11.5	24.5	1.28526	0.264421	1	.	1	.	.	.	.	.	10.6636	53772.8	17.484	21.7943	1.9e+10	2.8e+11	94.6918	2.9e+11	53554	5.3e+06	7.0e+10	66.1512	66.6314	3.53697	1.9e+10	74.6	1.80509	30.4516	0.264421	7684.81	147	1799	29.5632	2.20524	4.28872	6.84504	0.225752	0.181814	2.57009	1.99966	1.28526
11	FIN	Finland	芬兰	2009	D01T02	75.7	24.5	51.3	1.26774	0.428265	1	.	1	.	.	.	.	.	10.1484	47481.5	17.5679	22.2961	-8800000000	2.5e+11	91.2907	2.5e+11	47294	5.3e+06	5.8e+10	49.0078	66.5242	3.73402	-8800000000	74.5	1.86468	29.3249	0.428265	7646.34	127	1806	25.6604	2.25368	3.50881	6.39187	0.205542	0.147415	2.45025	1.93277	1.26774
11	FIN	Finland	芬兰	2010	D01T02	115.3	37.4	77.9	1.3798	0.50042	1	.	1	.	.	.	.	.	11.6581	46505.3	17.6484	19.8224	1.2e+10	2.5e+11	93.4478	2.5e+11	46460	5.4e+06	5.6e+10	55.5102	66.2478	3.70532	1.2e+10	73.8	1.8573	29.0755	0.50042	7720.22	102	1731	26.1583	2.4189	5.19161	8.00779	0.251846	0.157362	2.6458	1.91752	1.3798
11	FIN	Finland	芬兰	2011	D01T02	133.3	41.2	92.2	1.27481	0.589686	1	.	1	.	.	.	.	.	10.2303	51148.9	17.731	21.0095	-6000000000	2.8e+11	94.9199	2.8e+11	51082	5.4e+06	6.2e+10	59.3678	65.7796	3.61806	-6000000000	74	1.85167	29.8061	0.589686	7421.58	124	1650	25.0311	2.32124	5.42207	9.48993	0.245313	0.180877	2.56766	2.01416	1.27481
11	FIN	Finland	芬兰	2012	D01T02	152.7	46.2	106.6	1.24976	0.571156	1	.	1	.	.	.	.	.	9.12604	47708.1	17.8156	23.264	4.9e+09	2.6e+11	92.8774	2.6e+11	47710.8	5.4e+06	6.0e+10	57.8948	65.1978	3.39832	4.9e+09	72.3	1.87299	30.433	0.571156	7473.71	129	1698	23.3788	2.3145	5.48507	10.9192	0.228454	0.189468	2.54226	2.03419	1.24976
11	FIN	Finland	芬兰	2013	D01T02	188.6	50.5	138.1	1.29154	0.58824	1	.	1	.	.	.	.	.	9.22809	49892.2	17.8978	23.1516	-4900000000	2.7e+11	90.9942	2.7e+11	49878	5.4e+06	6.0e+10	56.0322	64.5476	3.27137	-4900000000	74	1.85392	31.6279	0.58824	7206.53	141	1596	23.3216	2.36735	5.00267	12.2158	0.246404	0.183708	2.6015	2.01426	1.29154
11	FIN	Finland	芬兰	2014	D01T02	158.9	40.9	118	1.30377	0.537655	1	.	1	.	.	.	.	.	8.45218	50327.2	17.972	23.1709	1.8e+10	2.7e+11	88.8817	2.8e+11	50260.3	5.5e+06	5.9e+10	55.0454	63.9153	3.14751	1.8e+10	73.4	1.82875	32.1985	0.537655	7009.29	126	1419	23.0975	2.39829	5.12113	10.7696	0.235466	0.166457	2.56401	1.96662	1.30377
11	FIN	Finland	芬兰	2015	D01T02	133.9	31.3	102.5	1.36995	0.549428	1	.	1	.	.	.	.	.	7.8137	42801.9	18.0301	25.3513	1.7e+10	2.3e+11	87.6799	2.3e+11	42784.7	5.5e+06	5.0e+10	51.2911	63.361	2.87196	1.8e+10	73.4	1.762	31.5706	0.549428	6844.55	127	1289	23.3058	2.25371	4.60616	6.76312	0.268694	0.160383	2.70841	1.97702	1.36995
11	FIN	Finland	芬兰	2016	D01T02	106.1	26.7	79.4	1.38242	0.436932	1	.	1	.	.	.	.	.	8.31625	43814	18.082	.	5.1e+09	2.4e+11	86.9785	2.4e+11	43784.3	5.5e+06	5.5e+10	49.3537	62.8752	2.72442	5.1e+09	72.6	1.73865	31.1544	0.436932	6531.48	108	1260	23.4974	2.31061	4.8849	7.66984	0.257987	0.152221	2.6609	1.92481	1.38242
11	FIN	Finland	芬兰	2017	D01T02	116.6	31.5	85.1	1.50004	0.3975	1	.	1	.	.	.	.	.	7.80932	46412.1	18.1239	.	1.7e+10	2.6e+11	88.1978	2.6e+11	46297.5	5.5e+06	6.0e+10	54.3726	62.4701	2.73349	1.7e+10	74	1.77225	31.045	0.3975	6721.83	139	1390	24.4007	2.31594	5.6864	7.87282	0.297299	0.150156	2.87295	1.91525	1.50004
11	FIN	Finland	芬兰	2018	D01T02	121.9	34.2	87.7	1.50251	0.419845	1	.	1	.	.	.	.	.	8.08288	49987.6	18.148	.	-11000000000	2.8e+11	90.2618	2.8e+11	49964.5	5.5e+06	6.6e+10	56.0609	62.134	2.75572	-11000000000	74.1	1.76113	31.4933	0.419845	6861.15	100	1387	23.9962	2.38668	5.86084	8.47942	0.305613	0.15657	2.89039	1.92371	1.50251
12	FRA	France	法国	1995	D01T02	127.8	67	60.8	1.00773	1.33619	1	.	1	.	.	.	.	.	5.91564	26889.4	108.742	43.606	2.4e+10	1.6e+12	50.377	1.6e+12	26890.2	6.0e+07	3.2e+11	36.8843	65.2804	2.29861	2.4e+10	64.4	1.22004	.	1.33619	.	3477	12419	22.3098	2.44477	2.53108	2.35406	0.12107	0.139682	2.16127	2.1447	1.00773
12	FRA	France	法国	1996	D01T02	30.5	17	13.4	1.01385	1.29357	1	.	1	.	.	.	.	.	6.15659	26870.3	109.131	43.2053	2.2e+10	1.6e+12	52.3643	1.6e+12	26871.8	6.0e+07	3.2e+11	37.3718	65.1864	2.2228	2.2e+10	63.7	1.20519	.	1.29357	2668.88	3484	12916	21.6752	2.40428	2.27307	2.5527	0.122071	0.139878	2.18981	2.1599	1.01385
12	FRA	France	法国	1997	D01T02	12	7.6	4.4	0.995147	1.21395	1	.	1	.	.	.	.	.	5.98756	24226.9	109.521	44.3367	2.3e+10	1.5e+12	53.3349	1.5e+12	24228.9	6.0e+07	2.8e+11	40.4141	65.1119	2.14699	2.3e+10	59.1	1.19033	.	1.21395	2657.86	3637	13252	21.5273	2.34426	2.20357	2.47583	0.127855	0.149258	2.17184	2.18243	0.995147
12	FRA	France	法国	1998	D01T02	84.1	46.4	37.7	1.00292	1.23832	1	.	1	.	.	.	.	.	6.33149	24971.6	109.928	42.2956	3.0e+10	1.5e+12	53.8835	1.5e+12	24974.3	6.0e+07	3.0e+11	41.8068	65.0642	2.09476	3.0e+10	58.9	1.17548	0.023182	1.23832	2664.54	3544	13251	21.4448	2.36246	1.98304	2.09088	0.126746	0.145096	2.1454	2.13916	1.00292
12	FRA	France	法国	1999	D01T02	130.7	69.1	61.6	0.964494	1.30778	1	.	1	.	.	.	.	.	6.19619	24678.4	110.497	43.2784	4.6e+10	1.5e+12	51.4899	1.5e+12	24673.2	6.0e+07	3.1e+11	42.9622	65.0411	2.10767	4.6e+10	59.1	1.2102	0.094255	1.30778	2732.74	3282	13592	21.2017	2.23626	1.85453	2.1494	0.120232	0.146703	2.06547	2.14151	0.964494
12	FRA	France	法国	2000	D01T02	140.3	65.2	75.1	0.949067	1.25797	1	.	1	.	.	.	.	.	6.12456	22416.4	111.258	44.9099	4.1e+10	1.4e+12	50.6031	1.4e+12	22364	6.1e+07	2.9e+11	48.9302	65.0356	2.09346	4.1e+10	57.4	1.24493	0.335122	1.25797	2915.69	3483	13870	21.2939	2.09836	1.91883	2.77063	0.123475	0.163387	2.07344	2.18471	0.949067
12	FRA	France	法国	2001	D01T02	67.2	31.3	35.9	0.956608	1.08388	1	.	1	.	.	.	.	.	6.13888	22449.3	112.073	44.244	5.0e+10	1.4e+12	50.4473	1.4e+12	22433.6	6.1e+07	3.0e+11	47.3668	64.9901	2.13804	5.0e+10	58	1.22008	1.01924	1.08388	2986.86	3605	13499	20.9384	2.10701	1.85415	2.53812	0.115617	0.159774	2.07346	2.16751	0.956608
12	FRA	France	法国	2002	D01T02	46.8	24	22.9	0.932398	1.13292	1	.	1	.	.	.	.	.	6.00195	24288.3	112.893	45.3657	5.2e+10	1.5e+12	50.2517	1.5e+12	24177.3	6.2e+07	3.1e+11	44.2339	64.9782	2.17449	5.2e+10	58	1.19524	2.78747	1.13292	3117.21	3389	13519	20.6495	2.01086	1.74724	2.41044	0.114163	0.160057	2.02778	2.1748	0.932398
12	FRA	France	法国	2003	D01T02	113.3	55.7	57.7	0.918335	1.15642	1	.	1	.	.	.	.	.	6.05082	29627.9	113.635	44.9967	4.2e+10	1.8e+12	52.317	1.8e+12	29568.4	6.2e+07	3.9e+11	42.9713	64.9888	2.11994	4.2e+10	59.2	1.16395	5.97603	1.15642	3199.75	3339	13511	20.1918	1.85016	1.69334	2.62366	0.113518	0.161618	2.02676	2.207	0.918335
12	FRA	France	法国	2004	D01T02	45.7	21.6	24.2	0.907059	1.18504	1	.	1	.	.	.	.	.	6.02372	33797.2	114.536	45.0833	3.6e+10	2.1e+12	53.4576	2.1e+12	33741.3	6.3e+07	4.5e+11	43.6278	65.0105	2.09461	3.6e+10	60.9	1.26314	10.9153	1.18504	3334.17	3060	14230	19.9575	1.82269	2.1109	2.86655	0.111184	0.164421	2.00737	2.21305	0.907059
12	FRA	France	法国	2005	D01T02	179.4	67.1	112.3	0.887723	1.1696	1	.	1	.	.	.	.	.	6.02413	34768.2	115.401	44.936	8.5e+10	2.2e+12	53.8823	2.2e+12	34760.2	6.3e+07	4.8e+11	44.0572	65.0343	2.05151	8.5e+10	60.5	1.26359	15.6519	1.1696	3313.26	2948	14327	19.6096	1.6801	2.12258	4.12539	0.112126	0.177738	2.00061	2.25364	0.887723
12	FRA	France	法国	2006	D01T02	76	28	48	0.861823	1.15271	1	.	1	.	.	.	.	.	5.83934	36470.2	116.204	45.689	7.9e+10	2.3e+12	53.8754	2.3e+12	36443.6	6.4e+07	5.2e+11	44.7593	65.006	2.05094	7.9e+10	61.1	1.28451	20.8654	1.15271	3423.75	2720	14529	19.2841	1.51849	2.81773	4.32619	0.114373	0.182902	1.94901	2.2615	0.861823
12	FRA	France	法国	2007	D01T02	175.1	53.2	121.9	0.869687	1.18088	1	.	1	.	.	.	.	.	5.66727	41557.6	116.923	45.2824	8.4e+10	2.7e+12	52.9475	2.7e+12	41508.4	6.4e+07	6.2e+11	44.8016	64.9929	2.02451	8.4e+10	62.1	1.25309	25.681	1.18088	3585.81	2387	14722	19.1367	1.61299	2.88032	3.84287	0.119278	0.182351	1.96842	2.26337	0.869687
12	FRA	France	法国	2008	D01T02	216.1	77.2	138.9	0.893474	1.22769	1	.	1	.	.	.	.	.	5.56061	45516	117.576	45.2858	6.8e+10	2.9e+12	52.4755	2.9e+12	45334.1	6.4e+07	6.9e+11	45.6772	64.9618	2.06117	6.8e+10	64.7	1.27202	28.8881	1.22769	3659.88	1761	14658	18.8138	1.51522	2.60548	5.0696	0.136325	0.196817	2.09381	2.34344	0.893474
12	FRA	France	法国	2009	D01T02	266.2	90.5	175.7	0.847344	1.15535	1	.	1	.	.	.	.	.	5.31183	41737.8	118.181	44.2374	1.8e+10	2.7e+12	52.7731	2.7e+12	41575.4	6.5e+07	5.9e+11	38.8687	64.8639	2.21207	1.8e+10	63.3	1.22419	31.9712	1.15535	3747.28	1593	14100	18.3048	1.32316	1.96885	3.53134	0.115134	0.192496	2.02381	2.38841	0.847344
12	FRA	France	法国	2010	D01T02	300.5	114.4	186.1	0.897681	1.20353	1	.	1	.	.	.	.	.	5.34792	40676.1	118.765	44.9793	3.9e+10	2.6e+12	54.8817	2.6e+12	40638.3	6.5e+07	5.8e+11	42.9438	64.6701	2.17857	3.9e+10	64.2	1.26879	34.1695	1.20353	3873.01	1832	14748	17.8457	1.60403	2.48276	3.65811	0.126281	0.171968	2.01771	2.24769	0.897681
12	FRA	France	法国	2011	D01T02	431.7	167	264.7	0.922751	1.29308	1	.	1	.	.	.	.	.	5.12876	43846.5	119.34	47.7201	4.4e+10	2.9e+12	55.6257	2.9e+12	43790.7	6.5e+07	6.4e+11	46.0089	64.3769	2.19161	4.4e+10	64.6	1.21225	36.2388	1.29308	3942.39	2099	14655	17.9782	1.65029	2.63855	4.54318	0.146987	0.183545	2.10341	2.2795	0.922751
12	FRA	France	法国	2012	D01T02	334.8	138	196.8	0.891079	1.19997	1	.	1	.	.	.	.	.	5.15393	40870.9	119.919	46.4504	3.3e+10	2.7e+12	57.909	2.7e+12	40874.7	6.6e+07	6.0e+11	46.3191	63.9962	2.22707	3.3e+10	63.2	1.19561	38.0204	1.19997	4073.25	2092	14540	17.8686	1.6318	2.40011	4.4464	0.137998	0.190597	2.05764	2.30916	0.891079
12	FRA	France	法国	2013	D01T02	519.6	184.1	335.4	0.882172	1.2648	1	.	1	.	.	.	.	.	5.12945	42602.7	120.54	46.4461	3.2e+10	2.8e+12	59.8488	2.8e+12	42592.9	6.6e+07	6.2e+11	44.9091	63.563	2.23703	3.2e+10	64.1	1.17721	39.3778	1.2648	4154.82	2196	14690	17.9718	1.45863	2.25962	3.91482	0.149415	0.199531	2.09582	2.37575	0.882172
12	FRA	France	法国	2014	D01T02	704.1	245.2	458.9	0.892597	1.16035	1	.	1	.	.	.	.	.	4.61606	43068.5	121.105	49.5904	5.8e+09	2.9e+12	61.5105	2.9e+12	43011.3	6.6e+07	6.2e+11	44.1072	63.1389	2.27592	5.8e+09	63.5	1.13167	40.8392	1.16035	4233.64	2033	14500	17.7459	1.55636	2.23331	3.87957	0.135584	0.190739	2.06363	2.31194	0.892597
12	FRA	France	法国	2015	D01T02	1380.9	363.6	1017.3	0.901009	1.15347	1	.	1	.	.	.	.	.	4.67782	36652.9	121.537	49.0615	4.3e+10	2.4e+12	62.7859	2.4e+12	36638.2	6.7e+07	5.2e+11	44.1727	62.7665	2.26703	4.3e+10	62.5	1.0998	42.1048	1.15347	4336.01	1994	14306	17.6797	1.60564	2.06188	2.95528	0.141285	0.179894	2.01742	2.23907	0.901009
12	FRA	France	法国	2016	D01T02	535.5	189.9	345.7	0.885051	1.0716	1	.	1	.	.	.	.	.	4.70477	37062.5	121.858	.	3.3e+10	2.5e+12	64.7277	2.5e+12	37037.4	6.7e+07	5.4e+11	43.2502	62.4703	2.22238	3.3e+10	62.3	1.05484	43.2572	1.0716	4414.7	2012	14206	17.4341	1.43711	1.93198	2.30761	0.140556	0.187573	2.01011	2.27118	0.885051
12	FRA	France	法国	2017	D01T02	557.3	225.7	331.6	0.893998	0.994348	1	.	1	.	.	.	.	.	4.74952	38781	122.212	.	3.6e+10	2.6e+12	65.8022	2.6e+12	38685.3	6.7e+07	5.8e+11	44.6021	62.2212	2.20348	3.6e+10	63.3	1.10573	44.4	0.994348	4569.91	1832	14415	17.2412	1.54241	2.17115	2.80076	0.133389	0.178851	1.97292	2.20685	0.893998
12	FRA	France	法国	2018	D01T02	699.1	264.5	434.7	0.934137	1.05325	1	.	1	.	.	.	.	.	4.57203	41557.9	122.651	.	7.7e+10	2.8e+12	67.5435	2.8e+12	41572.5	6.7e+07	6.4e+11	45.1199	62.0089	2.19294	7.8e+10	63.9	1.11652	45.2722	1.05325	4699.74	1919	14303	17.1884	1.64888	2.16882	3.29247	0.144313	0.176351	2.02419	2.16691	0.934137
13	DEU	Germany	德国	1995	D01T02	12.7	6.8	5.9	0.995036	0.267182	1	.	1	.	.	.	.	.	10.7086	31658.3	233.967	12.5198	1.2e+10	2.6e+12	45.3274	2.6e+12	31658.3	8.2e+07	6.1e+11	38.183	68.2659	2.1009	1.2e+10	69.8	1.54975	.	0.267182	.	8055	38103	29.7681	0.995456	2.59243	0.955771	0.071307	0.107979	1.96807	1.97789	0.995036
13	DEU	Germany	德国	1996	D01T02	4.7	2.8	1.8	1.02498	0.291136	1	.	1	.	.	.	.	.	11.04	30485.9	234.652	12.6408	1.6e+10	2.5e+12	46.9425	2.5e+12	30485.9	8.2e+07	5.8e+11	39.3933	68.1898	2.14461	1.6e+10	69.1	1.55643	.	0.291136	2830.53	9511	42322	28.8559	1.04217	2.30726	1.26916	0.074466	0.103595	1.97959	1.93135	1.02498
13	DEU	Germany	德国	1997	D01T02	6.5	4.1	2.4	1.01723	0.248641	1	.	1	.	.	.	.	.	10.6375	26964	235.023	13.4629	1.9e+10	2.2e+12	47.7921	2.2e+12	26964	8.2e+07	5.0e+11	43.3375	68.1196	2.18832	1.9e+10	67.5	1.5631	.	0.248641	2896.75	11291	44438	28.5781	1.03138	2.54887	1.17031	0.079586	0.113114	1.98773	1.95407	1.01723
13	DEU	Germany	德国	1998	D01T02	36	17.3	18.7	1.0102	0.266	1	.	1	.	.	.	.	.	10.5458	27289.1	235.079	12.9276	3.0e+10	2.2e+12	48.6418	2.2e+12	27289.1	8.2e+07	5.1e+11	45.343	68.0484	2.21613	3.0e+10	64.3	1.56978	.	0.266	2920.2	10843	46523	28.3845	0.975318	2.33584	1.03291	0.084146	0.114678	1.97539	1.95545	1.0102
13	DEU	Germany	德国	1999	D01T02	70.1	31.1	38.9	1.0071	0.286257	1	.	1	.	.	.	.	.	10.1534	26734.9	235.258	13.9892	8.6e+10	2.2e+12	49.4914	2.2e+12	26725.9	8.2e+07	5.1e+11	46.3761	67.9603	2.34779	8.6e+10	65.6	1.58711	.	0.286257	3129.27	9502	50029	27.6544	0.958397	2.23788	1.04057	0.084116	0.11633	1.96089	1.94706	1.0071
13	DEU	Germany	德国	2000	D01T02	73.5	23.8	49.6	1.0015	0.321714	1	.	1	.	.	.	.	.	10.0994	23694.8	235.597	14.0175	2.5e+11	1.9e+12	50.3411	1.9e+12	23635.9	8.2e+07	4.5e+11	53.985	67.8392	2.40982	2.5e+11	65.7	1.60443	0.324947	0.321714	3167.95	10406	51736	27.7124	0.994789	2.46346	1.41135	0.09302	0.127155	1.96461	1.96166	1.0015
13	DEU	Germany	德国	2001	D01T02	59.2	15.8	43.4	1.02236	0.290332	1	.	1	.	.	.	.	.	10.2936	23628.3	236.027	13.8577	5.7e+10	1.9e+12	51.1908	1.9e+12	23607.9	8.2e+07	4.2e+11	54.4087	67.606	2.40437	5.7e+10	69.5	1.58533	2.57623	0.290332	3245.82	10486	49989	27.0692	1.08343	2.43981	1.44739	0.089866	0.118655	1.94089	1.89844	1.02236
13	DEU	Germany	德国	2002	D01T02	45.8	15.3	30.5	0.967181	0.269811	1	.	1	.	.	.	.	.	10.103	25197.3	236.452	13.892	5.1e+10	2.1e+12	52.0404	2.1e+12	25077.7	8.2e+07	4.2e+11	53.471	67.3725	2.43622	5.1e+10	70.4	1.56623	3.93525	0.269811	3260.09	10589	47598	26.3787	0.900497	2.32326	1.42402	0.090133	0.121038	1.91592	1.98093	0.967181
13	DEU	Germany	德国	2003	D01T02	56.6	17	39.6	0.934675	0.26407	1	.	1	.	.	.	.	.	10.1388	30310.4	236.616	13.954	6.5e+10	2.5e+12	52.8901	2.5e+12	30243.6	8.3e+07	4.9e+11	54.331	67.1391	2.47461	6.5e+10	69.7	1.42501	5.49499	0.26407	3295.28	10663	47818	26.1868	0.832259	2.13366	1.51276	0.090063	0.129949	1.91499	2.04883	0.934675
13	DEU	Germany	德国	2004	D01T02	79	17.9	61.2	0.973365	0.253202	1	.	1	.	.	.	.	.	9.95045	34106.7	236.592	14.2295	-20000000000	2.8e+12	53.7398	2.8e+12	34044.1	8.3e+07	5.4e+11	57.8683	66.9147	2.43519	-20000000000	69.5	1.43411	8.61362	0.253202	3309.57	10786	48448	26.4048	0.951063	2.32225	1.86647	0.08905	0.124712	1.93034	1.98316	0.973365
13	DEU	Germany	德国	2005	D01T02	123.9	22.3	101.6	0.921611	0.258058	1	.	1	.	.	.	.	.	9.72946	34520.2	236.465	14.1592	6.0e+10	2.8e+12	54.5895	2.9e+12	34507.4	8.2e+07	5.4e+11	61.4233	66.715	2.44193	6.0e+10	68.1	1.49113	13.2822	0.258058	3335.03	11855	48367	26.3533	0.726956	2.55684	2.15738	0.104129	0.151415	1.96049	2.12724	0.921611
13	DEU	Germany	德国	2006	D01T02	142	23.7	118.2	0.93199	0.249668	1	.	1	.	.	.	.	.	9.88648	36353.9	236.225	14.2771	8.7e+10	3.0e+12	55.4391	3.0e+12	36323.4	8.2e+07	5.9e+11	67.3348	66.505	2.47232	8.7e+10	70.8	1.53293	18.4499	0.249668	3434.57	12573	48012	26.9744	0.737585	3.24106	2.52514	0.108581	0.15523	1.97693	2.12119	0.93199
13	DEU	Germany	德国	2007	D01T02	240.4	38.5	201.9	0.939786	0.270819	1	.	1	.	.	.	.	.	9.52762	41640.1	235.943	13.4592	5.1e+10	3.4e+12	56.2888	3.4e+12	41587.2	8.2e+07	6.9e+11	69.4545	66.3117	2.46048	5.1e+10	70.8	1.51572	24.3292	0.270819	3578.5	13139	47853	27.2365	0.77886	3.28307	2.28098	0.12023	0.161266	2.02602	2.15583	0.939786
13	DEU	Germany	德国	2008	D01T02	158.3	36	122.3	0.954513	0.303536	1	.	1	.	.	.	.	.	9.61746	45612.7	235.522	13.9198	3.1e+10	3.7e+12	57.1385	3.7e+12	45427.2	8.2e+07	7.6e+11	70.542	66.1371	2.61513	3.1e+10	70.6	1.46662	27.9621	0.303536	3733.28	13177	49240	26.8487	0.83833	3.11835	2.61473	0.129151	0.161478	2.052	2.14979	0.954513
13	DEU	Germany	德国	2009	D01T02	104.4	32.7	71.7	0.879146	0.282169	1	.	1	.	.	.	.	.	8.97173	41650.4	234.94	13.8505	5.7e+10	3.4e+12	57.9882	3.4e+12	41485.9	8.2e+07	6.6e+11	60.227	65.9927	2.74266	5.7e+10	70.5	1.4508	30.7216	0.282169	3922.21	11724	47859	24.7358	0.695334	2.56725	2.02576	0.110955	0.154889	1.93755	2.2039	0.879146
13	DEU	Germany	德国	2010	D01T02	107.5	43.4	64.1	0.949326	0.306168	1	.	1	.	.	.	.	.	9.45339	41572.5	234.607	13.9437	8.6e+10	3.4e+12	58.8378	3.4e+12	41531.9	8.2e+07	6.6e+11	68.1242	65.8789	2.73024	8.6e+10	71.1	1.44106	32.1696	0.306168	4058	12198	47047	26.8489	0.803697	3.00263	1.96777	0.129482	0.174231	2.05607	2.16582	0.949326
13	DEU	Germany	德国	2011	D01T02	125.8	42	83.8	0.998596	0.313537	1	.	1	.	.	.	.	.	9.299	46705.9	230.305	12.5714	9.8e+10	3.7e+12	59.6875	3.7e+12	46644.8	8.0e+07	7.6e+11	72.8781	65.7853	2.80555	9.8e+10	71.8	1.44344	33.4758	0.313537	4188.81	12458	46986	27.069	0.910022	3.30755	2.29647	0.149176	0.178661	2.14617	2.14919	0.998596
13	DEU	Germany	德国	2012	D01T02	121.6	44.6	77	0.981329	0.311384	1	.	1	.	.	.	.	.	9.45129	43855.9	230.751	12.2845	6.5e+10	3.5e+12	60.5372	3.5e+12	43858.4	8.0e+07	7.2e+11	72.4614	65.7482	2.88166	6.5e+10	71	1.46556	34.2835	0.311384	4352.32	14720	46620	27.284	0.847919	3.04618	2.44299	0.154578	0.191258	2.16129	2.20241	0.981329
13	DEU	Germany	德国	2013	D01T02	184	62.6	121.4	1.00968	0.344171	1	.	1	.	.	.	.	.	9.62423	46298.9	231.156	12.2088	6.7e+10	3.7e+12	61.3868	3.7e+12	46285.8	8.1e+07	7.4e+11	70.3584	65.7323	2.83599	6.7e+10	72.8	1.48217	35.0658	0.344171	4366.69	15814	47353	26.7826	0.942643	2.76716	2.41595	0.15679	0.18001	2.16165	2.14094	1.00968
13	DEU	Germany	德国	2014	D01T02	272.1	97.1	175	1.00971	0.338661	1	.	1	.	.	.	.	.	9.08853	48023.9	232.108	12.982	2.0e+10	3.9e+12	65.5039	3.9e+12	47960	8.1e+07	7.8e+11	69.5536	65.6837	2.87784	2.0e+10	73.4	1.58186	36.1266	0.338661	4320.7	17811	48154	27.011	0.904548	2.68113	2.25199	0.155821	0.176625	2.14442	2.1238	1.00971
13	DEU	Germany	德国	2015	D01T02	254.1	89.9	164.2	0.919664	0.316562	1	.	1	.	.	.	.	.	9.08734	41103.3	234.153	12.8636	6.2e+10	3.4e+12	67.7469	3.4e+12	41086.7	8.2e+07	6.7e+11	70.8335	65.5645	2.93003	6.2e+10	73.8	1.53577	37.4147	0.316562	4743.79	19509	47384	27.1098	0.684692	2.46485	2.13442	0.158434	0.198613	2.06374	2.24401	0.919664
13	DEU	Germany	德国	2016	D01T02	245.9	86.8	159.1	0.940198	0.290984	1	.	1	.	.	.	.	.	9.07297	42136.1	235.713	.	6.5e+10	3.5e+12	69.5806	3.5e+12	42107.5	8.2e+07	7.0e+11	68.9166	65.396	2.94099	6.5e+10	74.4	1.51036	38.6996	0.290984	4861.74	19419	48480	27.5685	0.698431	2.31085	1.64383	0.15261	0.184101	2.04134	2.17118	0.940198
13	DEU	Germany	德国	2017	D01T02	241.2	91.2	150	0.989792	0.264243	1	.	1	.	.	.	.	.	8.85834	44652.6	236.589	.	1.1e+11	3.7e+12	70.2467	3.7e+12	44542.3	8.3e+07	7.5e+11	70.9204	65.1778	3.06792	1.1e+11	73.8	1.4881	40.2209	0.264243	5076.52	19927	47785	27.4623	0.851749	2.50745	1.77185	0.144552	0.16853	2.04633	2.06743	0.989792
13	DEU	Germany	德国	2018	D01T02	268.2	97.7	170.5	0.933186	0.263835	1	.	1	.	.	.	.	.	8.5362	47939.3	237.294	.	1.7e+11	4.0e+12	70.3426	4.0e+12	47950.2	8.3e+07	8.4e+11	71.5634	64.917	3.13267	1.6e+11	74.2	1.49553	41.1983	0.263835	5217.3	21281	46617	27.3063	0.689091	2.56915	2.06425	0.149327	0.191557	2.03435	2.18	0.933186
14	GRC	Greece	希腊	1995	D01T02	0.5	0.3	0.2	1.25392	2.31876	1	.	1	.	.	.	.	.	7.84258	12959.3	81.9407	1.4929	1.1e+09	1.4e+11	35.9556	1.4e+11	12959.3	1.1e+07	2.7e+10	26.9962	68.2807	0.28997	1.1e+09	61.2	0.675785	.	2.31876	.	46	266	19.6147	7.37581	7.88093	6.50924	0.062498	0.052176	2.11844	1.68945	1.25392
14	GRC	Greece	希腊	1996	D01T02	3.1	1.7	1.4	1.24051	2.22887	1	.	1	.	.	.	.	.	7.80048	13749.1	82.3026	1.73205	1.1e+09	1.5e+11	39.6204	1.5e+11	13749.1	1.1e+07	3.0e+10	27.3883	68.2968	0.359535	1.1e+09	60.5	0.720668	.	2.22887	.	37	267	18.8654	6.58493	6.7175	8.41491	0.061212	0.06021	2.11324	1.70353	1.24051
14	GRC	Greece	希腊	1997	D01T02	0.5	0.4	0.1	1.23131	1.99757	1	.	1	.	.	.	.	.	7.85664	13427.8	82.7095	1.56957	9.8e+08	1.4e+11	43.4887	1.4e+11	13427.8	1.1e+07	2.9e+10	26.7153	68.3689	0.4291	9.8e+08	59.6	0.76555	.	1.99757	1005.33	57	293	17.9341	6.24164	7.50665	8.2888	0.063125	0.059641	2.04977	1.66471	1.23131
14	GRC	Greece	希腊	1998	D01T02	0.4	0.4	0	1.22601	2.04137	1	.	1	.	.	.	.	.	8.12715	13472.1	83.1692	1.45909	7.1e+07	1.4e+11	44.6781	1.4e+11	13472.1	1.1e+07	3.4e+10	28.4986	68.454	0.498665	7.1e+07	60.6	0.810433	.	2.04137	.	34	276	18.2006	5.96505	7.7708	6.76626	0.066306	0.064555	2.03093	1.65653	1.22601
14	GRC	Greece	希腊	1999	D01T02	1	0.8	0.2	1.2019	1.95881	1	.	1	.	.	.	.	.	8.12098	13249.7	83.4887	1.69418	8.3e+07	1.4e+11	46.3855	1.4e+11	13245.2	1.1e+07	3.5e+10	29.1839	68.495	0.56823	8.3e+07	61	0.802505	.	1.95881	1337.3	33	290	19.127	5.78349	7.21175	9.09725	0.072712	0.069385	1.98878	1.65469	1.2019
14	GRC	Greece	希腊	2000	D01T02	0.4	0.4	0	1.15138	2.05166	1	.	1	.	.	.	.	.	8.74165	12072.9	83.8309	1.43802	-8200000	1.3e+11	50.7843	1.3e+11	12043	1.1e+07	3.2e+10	34.7573	68.4689	0.563855	-8200000	61	0.794577	.	2.05166	.	34	306	18.7476	5.43525	7.68583	14.6891	0.085749	0.093905	1.95726	1.69992	1.15138
14	GRC	Greece	希腊	2001	D01T02	1.3	1.3	0	1.14278	2.32131	1	.	1	.	.	.	.	.	8.894	12549	84.2679	1.12855	2.0e+06	1.4e+11	58.0332	1.4e+11	12538.2	1.1e+07	3.4e+10	32.6937	68.2684	0.55948	2.0e+06	63.4	0.806147	.	2.32131	1290.71	49	385	19.3328	5.2027	8.85458	11.1353	0.096456	0.095264	1.87671	1.64223	1.14278
14	GRC	Greece	希腊	2002	D01T02	2.1	2.1	0	1.08189	2.0312	1	.	1	.	.	.	.	.	8.86039	14177.6	84.5774	1.29893	3.4e+07	1.5e+11	64.928	1.5e+11	14110.3	1.1e+07	3.6e+10	27.2923	68.0208	0.55301	3.4e+07	59.1	0.817718	.	2.0312	.	36	376	19.4387	4.98711	8.55149	8.44684	0.077004	0.085712	1.75595	1.62304	1.08189
14	GRC	Greece	希腊	2003	D01T02	13.8	7.3	6.5	1.09131	1.84733	1	.	1	.	.	.	.	.	9.17057	18518.4	84.7794	1.81624	1.4e+09	2.0e+11	70.0051	2.0e+11	18477.6	1.1e+07	5.1e+10	28.8395	67.7535	0.54654	1.4e+09	58.8	0.770711	0.094289	1.84733	1393.3	27	393	20.5175	4.99978	8.50895	6.87848	0.069964	0.076129	1.67892	1.53844	1.09131
14	GRC	Greece	希腊	2004	D01T02	9.4	4.3	5.1	0.999309	1.45889	1	.	1	.	.	.	.	.	9.11395	21995.5	84.9895	1.86707	2.1e+09	2.4e+11	76.2224	2.4e+11	21955.1	1.1e+07	5.9e+10	28.3002	67.5225	0.5273	2.2e+09	59.1	0.784978	0.462929	1.45889	.	28	379	20.344	4.27541	9.11718	6.88339	0.060046	0.092033	1.64243	1.64357	0.999309
14	GRC	Greece	希腊	2005	D01T02	9.8	3.8	6	1.06602	1.76839	1	.	1	.	.	.	.	.	9.27864	22560.1	85.2391	1.95185	6.9e+08	2.5e+11	85.3121	2.5e+11	22551.7	1.1e+07	5.2e+10	30.7386	67.3584	0.57896	6.9e+08	59	0.738906	1.44071	1.76839	1745.49	20	462	17.8045	4.28422	8.30283	9.41658	0.074327	0.095638	1.76023	1.65122	1.06602
14	GRC	Greece	希腊	2006	D01T02	12.2	4.4	7.8	0.989295	1.70246	1	.	1	.	.	.	.	.	9.13788	24821.9	85.4954	2.32899	5.4e+09	2.7e+11	90.0983	2.7e+11	24801.2	1.1e+07	6.5e+10	32.5003	67.0013	0.56118	5.4e+09	60.1	0.721762	4.39561	1.70246	1779.75	30	532	19.9872	3.20124	10.7554	13.0348	0.083887	0.121073	1.72065	1.73927	0.989295
14	GRC	Greece	希腊	2007	D01T02	1.7	0.8	0.9	0.960779	1.35524	1	.	1	.	.	.	.	.	9.44111	28864	85.7135	1.72917	2.0e+09	3.2e+11	87.395	3.2e+11	28827.3	1.1e+07	8.3e+10	34.9801	66.6919	0.57655	2.0e+09	58.7	0.683412	9.17347	1.35524	1889.69	20	575	17.9984	3.03735	10.6098	12.1529	0.079539	0.124361	1.70004	1.76944	0.960779
14	GRC	Greece	希腊	2008	D01T02	3.9	1.6	2.3	0.943603	1.39395	1	.	1	.	.	.	.	.	9.06364	32128	85.9414	2.07668	5.7e+09	3.5e+11	92.8621	3.6e+11	31997.3	1.1e+07	8.4e+10	36.0824	66.4075	0.66183	5.7e+09	60.6	0.610041	13.6089	1.39395	.	30	628	15.6598	2.80725	8.56805	21.6365	0.092352	0.137358	1.69423	1.79549	0.943603
14	GRC	Greece	希腊	2009	D01T02	2.9	1.5	1.3	1.00998	1.45442	1	.	1	.	.	.	.	.	8.52976	29828.8	86.1677	2.82164	2.8e+09	3.3e+11	98.3292	3.3e+11	29711	1.1e+07	6.9e+10	30.0848	66.1137	0.62557	2.8e+09	60.8	0.476692	17.3364	1.45442	.	22	698	15.3135	2.80495	6.79125	20.3161	0.081218	0.119483	1.77817	1.7606	1.00998
14	GRC	Greece	希腊	2010	D01T02	8.3	4	4.3	1.04224	1.70123	1	.	1	.	.	.	.	.	7.87481	26716.6	86.2788	3.7683	5.3e+08	3.0e+11	103.796	3.0e+11	26690.6	1.1e+07	4.9e+10	31.6418	65.7932	0.59838	5.3e+08	62.7	0.42399	20.416	1.70123	.	16	728	14.9012	2.98833	8.28992	26.0766	0.103185	0.125308	1.90031	1.82329	1.04224
14	GRC	Greece	希腊	2011	D01T02	97.6	30.6	67	1.0711	1.49269	1	.	1	.	.	.	.	.	7.6135	25483.9	86.1513	3.11545	1.1e+09	2.8e+11	109.159	2.8e+11	25450.5	1.1e+07	3.9e+10	35.5537	65.5525	0.67196	1.1e+09	60.3	0.367414	22.3929	1.49269	2278.52	19	722	14.3771	3.11375	8.82709	30.8481	0.108279	0.133281	1.99243	1.86017	1.0711
14	GRC	Greece	希腊	2012	D01T02	103.4	32.9	70.6	1.11971	1.76367	1	.	1	.	.	.	.	.	7.25081	21913	85.6867	3.69539	1.7e+09	2.4e+11	113.741	2.4e+11	21915.2	1.1e+07	2.8e+10	40.0779	65.3158	0.69957	1.7e+09	55.4	0.261261	24.5304	1.76367	2300.31	28	628	14.8048	3.44107	7.57301	38.9474	0.131297	0.134484	2.06939	1.84814	1.11971
14	GRC	Greece	希腊	2013	D01T02	69.1	21.3	47.8	1.04152	1.69028	1	.	1	.	.	.	.	.	6.61038	21787.8	85.0676	5.63723	2.9e+09	2.4e+11	116.377	2.4e+11	21749.2	1.1e+07	2.7e+10	40.6732	65.081	0.81131	3.0e+09	55.4	0.338038	26.691	1.69028	2721.31	19	698	15.0599	3.3826	7.28125	39.8795	0.125358	0.150606	2.01127	1.9311	1.04152
14	GRC	Greece	希腊	2014	D01T02	26.7	13.6	13	1.02247	1.66833	1	.	1	.	.	.	.	.	6.38506	21616.7	84.5028	5.41765	2.7e+09	2.4e+11	122.402	2.4e+11	21601.8	1.1e+07	2.6e+10	41.6255	64.8471	0.8333	2.7e+09	55.7	0.241074	29.0535	1.66833	2791.87	19	651	14.1197	3.58413	7.73427	38.4498	0.116329	0.144605	1.90913	1.86717	1.02247
14	GRC	Greece	希腊	2015	D01T02	23	13.8	9.2	1.03398	1.78936	1	.	1	.	.	.	.	.	6.28509	18083.9	83.9479	6.20248	1.3e+09	2.0e+11	126.971	2.0e+11	18050.1	1.1e+07	2.1e+10	38.573	64.6191	0.96121	1.3e+09	54	0.212918	31.8233	1.78936	3255.99	23	550	14.4993	3.8647	8.84628	29.8025	0.114203	0.134966	1.87849	1.81675	1.03398
14	GRC	Greece	希腊	2016	D01T02	34.2	14.6	19.6	0.990292	2.00684	1	.	1	.	.	.	.	.	6.20349	17924	83.5995	.	2.7e+09	1.9e+11	131.541	1.9e+11	17885.4	1.1e+07	2.1e+10	38.8933	64.5148	0.99394	2.7e+09	53.2	0.156203	33.629	2.00684	2769.9	40	606	14.532	3.51534	8.61869	27.4867	0.125692	0.144675	1.87448	1.89286	0.990292
14	GRC	Greece	希腊	2017	D01T02	36.2	17	19.2	0.98748	1.78052	1	.	1	.	.	.	.	.	6.21083	18582.1	83.4343	.	3.4e+09	2.0e+11	136.603	2.0e+11	18562.2	1.1e+07	2.3e+10	43.1406	64.3958	1.13109	3.4e+09	55	0.188696	35.3366	1.78052	3311.45	91	498	13.7287	3.85639	9.41025	31.5206	0.113729	0.142938	1.83633	1.85961	0.98748
14	GRC	Greece	希腊	2018	D01T02	67.7	26.7	41	0.982376	1.87068	1	.	1	.	.	.	.	.	6.05813	19757	83.2652	.	4.0e+09	2.1e+11	142.852	2.1e+11	19766	1.1e+07	2.3e+10	48.7301	64.2735	1.17732	4.0e+09	57.3	0.278355	37.2591	1.87068	3486.72	149	430	13.6284	3.63541	9.05448	34.3276	0.130879	0.160127	1.83641	1.86936	0.982376
15	HUN	Hungary	匈牙利	1995	D01T02	0.7	0.6	0.1	1.12478	1.55166	0	.	1	.	.	.	.	.	5.56022	4494.71	114.945	14.5496	4.8e+09	4.6e+10	22.1563	4.6e+10	4494.71	1.0e+07	1.0e+10	61.0223	67.6528	0.56159	4.8e+09	55.2	0.833246	.	1.55166	.	1793	1096	25.8055	7.17804	4.98746	3.08222	0.108735	0.125993	2.57805	2.29204	1.12478
15	HUN	Hungary	匈牙利	1996	D01T02	0.8	0.6	0.1	1.11154	1.47358	0	.	1	.	.	.	.	.	5.66905	4525.04	114.748	14.4098	3.3e+09	4.7e+10	24.5864	4.7e+10	4525.04	1.0e+07	1.1e+10	72.548	67.7881	0.63027	3.3e+09	56.8	0.885501	.	1.47358	1007.31	850	803	25.4121	7.26248	4.05074	3.38055	0.109097	0.134308	2.60502	2.34361	1.11154
15	HUN	Hungary	匈牙利	1997	D01T02	0.8	0.6	0.2	1.07441	1.48235	0	.	1	.	.	.	.	.	5.53813	4596.18	114.593	14.4905	4.2e+09	4.7e+10	26.233	4.7e+10	4596.18	1.0e+07	1.1e+10	85.2803	67.8564	0.69895	4.2e+09	55.3	0.937756	.	1.48235	1082.02	888	737	27.7903	6.32228	2.98578	2.26606	0.134193	0.1587	2.45548	2.28543	1.07441
15	HUN	Hungary	匈牙利	1998	D01T02	0.7	0.6	0.2	1.03079	1.59982	0	.	1	.	.	.	.	.	5.58641	4744.21	114.327	14.6291	3.3e+09	4.9e+10	30.092	4.9e+10	4744.21	1.0e+07	1.2e+10	100.007	67.886	0.65711	3.3e+09	56.9	0.990012	.	1.59982	1141.19	904	690	28.0954	6.0365	2.38204	1.84512	0.149382	0.183769	2.30106	2.23232	1.03079
15	HUN	Hungary	匈牙利	1999	D01T02	1.2	0.9	0.3	0.979214	1.40271	0	.	1	.	.	.	.	.	5.65669	4793.48	114.004	14.9025	3.4e+09	4.9e+10	32.5002	4.9e+10	4793.48	1.0e+07	1.2e+10	108.097	67.9479	0.67186	3.4e+09	59.6	0.979933	.	1.40271	1227.29	3779	729	27.5178	5.31042	2.00503	1.58938	0.137799	0.197019	2.2396	2.28714	0.979214
15	HUN	Hungary	匈牙利	2000	D01T02	1.8	1.3	0.6	0.9642	1.25634	0	.	1	.	.	.	.	.	5.35045	4624.28	113.936	15.2815	2.7e+09	4.7e+10	35.941	4.7e+10	4624.28	1.0e+07	1.2e+10	127.84	68.0741	0.79096	2.8e+09	64.4	0.969855	0.033327	1.25634	1409.52	4127	810	27.0486	4.93446	2.24317	1.61331	0.146064	0.232839	2.27333	2.35774	0.9642
15	HUN	Hungary	匈牙利	2001	D01T02	2.1	1.4	0.7	0.932245	1.3393	0	.	1	.	.	.	.	.	5.52442	5276.03	113.675	14.8823	4.1e+09	5.4e+10	39.6981	5.4e+10	5276.03	1.0e+07	1.3e+10	119.168	68.2484	0.9131	4.1e+09	65.6	1.01325	0.308353	1.3393	1438.77	4529	919	27.1378	4.91439	2.01971	1.58612	0.144108	0.234695	2.21176	2.37251	0.932245
15	HUN	Hungary	匈牙利	2002	D01T02	1.8	1.3	0.5	0.943899	1.29509	0	.	1	.	.	.	.	.	5.47318	6655.33	113.352	14.6933	3.6e+09	6.8e+10	44.5507	6.8e+10	6655.33	1.0e+07	1.7e+10	106.897	68.4055	0.98355	3.6e+09	64.5	1.05664	1.09828	1.29509	1471.88	5064	842	26.807	4.2608	1.87762	1.48652	0.140499	0.224657	2.23365	2.36641	0.943899
15	HUN	Hungary	匈牙利	2003	D01T02	1.5	1.1	0.5	0.962357	1.23775	0	.	1	.	.	.	.	.	5.74427	8419.43	113.028	11.4595	4.2e+09	8.5e+10	52.2356	8.5e+10	8421.1	1.0e+07	2.0e+10	106.565	68.5582	0.91865	4.2e+09	63	0.998013	2.61227	1.23775	1496.84	4054	756	26.389	3.90187	1.82588	1.55167	0.146895	0.225902	2.25085	2.3389	0.962357
15	HUN	Hungary	匈牙利	2004	D01T02	2.1	1.2	0.9	0.948115	1.29295	0	.	1	.	.	.	.	.	5.57524	10301.7	112.778	12.3989	4.5e+09	1.0e+11	60.0567	1.0e+11	10285.8	1.0e+07	2.5e+10	111.682	68.7134	0.86123	4.5e+09	62.7	0.935392	4.07263	1.29295	1473.53	1909	748	26.8506	4.35241	1.97921	1.80298	0.142497	0.220846	2.103	2.21809	0.948115
15	HUN	Hungary	匈牙利	2005	D01T02	1.3	0.6	0.8	0.91456	1.27084	0	.	1	.	.	.	.	.	5.54385	11223.4	112.566	13.5777	2.7e+10	1.1e+11	64.9921	1.1e+11	11200.6	1.0e+07	2.7e+10	114.61	68.8645	0.92139	2.8e+10	63.5	0.922943	6.46932	1.27084	1574.27	497	705	27.1818	3.72139	1.87151	2.61978	0.152165	0.24184	2.0743	2.26808	0.91456
15	HUN	Hungary	匈牙利	2006	D01T02	2.5	1	1.6	0.900433	1.22096	0	.	1	.	.	.	.	.	5.50645	11489.6	112.391	13.3594	1.9e+10	1.2e+11	67.5442	1.2e+11	11475.8	1.0e+07	2.7e+10	132.826	68.8183	0.97857	1.9e+10	65	0.957198	11.9239	1.22096	1744.99	206	718	27.1919	3.53561	2.02612	2.33861	0.162043	0.262319	2.0722	2.30133	0.900433
15	HUN	Hungary	匈牙利	2007	D01T02	2	0.6	1.3	0.930181	1.55145	0	.	1	.	.	.	.	.	5.35517	13940.9	112.217	14.8799	7.1e+10	1.4e+11	68.285	1.4e+11	13919	1.0e+07	3.3e+10	136.437	68.8268	0.95595	7.1e+10	64.8	0.879124	14.4855	1.55145	1734.91	102	689	26.702	3.48656	1.78315	2.79402	0.208311	0.261515	2.15231	2.31386	0.930181
15	HUN	Hungary	匈牙利	2008	D01T02	6.8	4	2.9	0.941394	1.46106	0	.	1	.	.	.	.	.	5.28125	15772.3	112.021	15.241	7.5e+10	1.6e+11	66.4838	1.6e+11	15753.5	1.0e+07	3.7e+10	137.504	68.8878	0.97874	7.5e+10	67.6	0.836122	17.6642	1.46106	1851.91	89	683	25.7611	3.45297	1.64535	3.09138	0.225842	0.262025	2.18304	2.31894	0.941394
15	HUN	Hungary	匈牙利	2009	D01T02	6.8	4	2.8	0.95056	1.44862	0	.	1	.	.	.	.	.	4.7731	13077.3	110.711	16.9576	-2800000000	1.3e+11	64.6079	1.3e+11	13046.5	1.0e+07	3.0e+10	122.949	68.971	1.13068	-2800000000	66.8	0.73844	19.7503	1.44862	2014.57	30	757	25.0893	3.05645	1.23603	2.46413	0.23559	0.260086	2.24124	2.35781	0.95056
15	HUN	Hungary	匈牙利	2010	D01T02	11.8	5.6	6.2	0.978727	1.40913	0	.	1	.	.	.	.	.	4.78804	13217.5	110.461	16.8156	-21000000000	1.3e+11	63.7224	1.3e+11	13191.6	1.0e+07	2.7e+10	139.225	69.0477	1.1376	-21000000000	66.1	0.734847	21.6227	1.40913	2149.81	47	649	25.1999	3.03417	1.65717	2.65553	0.263162	0.264806	2.25024	2.29915	0.978727
15	HUN	Hungary	匈牙利	2011	D01T02	22.2	8.1	14.2	0.978612	1.4314	0	.	1	.	.	.	.	.	4.70403	14234.5	110.148	17.3453	1.1e+10	1.4e+11	62.5932	1.4e+11	14216.2	1.0e+07	2.8e+10	151.49	68.9302	1.18621	1.1e+10	66.6	0.742006	23.2396	1.4314	2326.17	36	662	25.1041	3.99524	1.94493	3.48648	0.250738	0.250412	2.16491	2.21222	0.978612
15	HUN	Hungary	匈牙利	2012	D01T02	15.8	5.3	10.5	1.016	1.5746	0	.	1	.	.	.	.	.	4.37758	12984.8	109.581	18.6143	1.1e+10	1.3e+11	61.4632	1.3e+11	12950.7	9.9e+06	2.5e+10	154.696	68.8125	1.26069	1.1e+10	67.1	0.668932	24.1484	1.5746	2416.48	66	692	25.0182	3.89109	1.84909	4.03999	0.28209	0.264264	2.2937	2.25757	1.016
15	HUN	Hungary	匈牙利	2013	D01T02	15.8	4.9	11	0.973199	1.35812	0	.	1	.	.	.	.	.	4.12031	13715.1	109.28	19.0844	-3600000000	1.4e+11	57.065	1.4e+11	13687.5	9.9e+06	2.8e+10	153.321	68.6561	1.38691	-3600000000	67.3	0.666548	26.2481	1.35812	2546.08	66	642	25.0491	3.91709	1.70937	3.59653	0.243206	0.26826	2.20209	2.26274	0.973199
15	HUN	Hungary	匈牙利	2014	D01T02	13.5	4.8	8.7	0.975214	1.25763	0	.	1	.	.	.	.	.	4.1175	14294.3	108.114	19.049	1.3e+10	1.4e+11	52.0159	1.4e+11	14267	9.9e+06	3.1e+10	153.106	68.4188	1.34914	1.3e+10	67	0.529183	26.1508	1.25763	2673.43	73	546	25.6905	3.93604	1.49665	3.33738	0.232899	0.261507	2.14612	2.20066	0.975214
15	HUN	Hungary	匈牙利	2015	D01T02	12.7	4.7	8	1.01002	1.24269	0	.	1	.	.	.	.	.	4.4076	12717	107.857	18.4515	-5300000000	1.3e+11	48.9621	1.3e+11	12706.9	9.8e+06	2.8e+10	152.307	68.0826	1.34652	-5300000000	66.8	0.519721	27.6181	1.24269	2589.1	64	569	26.3832	3.78956	1.27862	2.29528	0.244325	0.25754	2.20021	2.17838	1.01002
15	HUN	Hungary	匈牙利	2016	D01T02	12.6	4.9	7.7	1.00967	1.15784	0	.	1	.	.	.	.	.	4.50869	13104.7	107.539	.	7.0e+10	1.3e+11	48.0389	1.3e+11	13090.5	9.8e+06	2.5e+10	152.408	67.6266	1.19007	7.0e+10	66	0.440659	28.6754	1.15784	2645.76	49	616	25.4925	3.89013	1.2012	1.82121	0.228412	0.254313	2.16543	2.1447	1.00967
15	HUN	Hungary	匈牙利	2017	D01T02	15.6	6.3	9.3	1.06756	1.28464	0	.	1	.	.	.	.	.	4.74411	14621.2	107.254	.	-12000000000	1.4e+11	48.5004	1.4e+11	14605.9	9.8e+06	3.2e+10	154.814	67.0499	1.33193	-12000000000	65.8	0.493861	30.2033	1.28464	2921.53	36	496	25.1697	3.7542	1.37784	2.49991	0.259472	0.248592	2.25701	2.11418	1.06756
15	HUN	Hungary	匈牙利	2018	D01T02	15.5	6	9.5	1.0359	1.3082	0	.	1	.	.	.	.	.	4.74612	16425.2	107.118	.	-64000000000	1.6e+11	50.3065	1.6e+11	16411.4	9.8e+06	4.0e+10	152.992	66.4303	1.53337	-65000000000	66.7	0.461979	31.5	1.3082	3873.91	36	407	25.0843	3.48639	1.48497	2.80672	0.254154	0.258372	2.22035	2.1434	1.0359
16	ISL	Iceland	冰岛	1995	D01T02	0.1	0.1	0	1.13799	0.197876	1	.	1	.	.	.	.	.	7.48179	26633.6	2.66801	35.7139	-9300000	7.1e+09	35.4758	7.1e+09	26633.6	267468	1.3e+09	49.9745	64.3398	1.4798	-9300000	69.1	1.49667	.	0.197876	.	49	19	21.9161	8.7875	12.0366	0.047691	0.198257	0.166151	2.26298	1.98858	1.13799
16	ISL	Iceland	冰岛	1996	D01T02	0.1	0.1	0	1.1206	0.188825	1	.	1	.	.	.	.	.	8.4291	27614.9	2.68245	32.6814	8.3e+07	7.4e+09	35.8639	7.4e+09	27614.9	268916	1.5e+09	53.0428	64.3791	1.6376	8.3e+07	69.8	1.53924	.	0.188825	3294.47	75	16	21.3153	8.58003	10.642	0.060752	0.204216	0.181648	2.28213	2.03653	1.1206
16	ISL	Iceland	冰岛	1997	D01T02	0	0	0	1.03438	0.166079	1	.	1	.	.	.	.	.	7.94448	27919.2	2.70452	35.3052	1.5e+08	7.6e+09	37.8627	7.6e+09	27919.2	271128	1.7e+09	51.1119	64.5443	1.7954	1.5e+08	70.5	1.58181	.	0.166079	4916.96	216	22	25.6155	8.04596	12.6511	0.059233	0.184712	0.19524	2.15757	2.08585	1.03438
16	ISL	Iceland	冰岛	1998	D01T02	0	0	0	1.0955	0.172413	1	.	1	.	.	.	.	.	7.8577	31030	2.73364	35.9692	1.5e+08	8.5e+09	38.7467	8.5e+09	31030.1	274047	2.2e+09	51.8951	64.7765	1.9532	1.5e+08	71.2	1.62437	.	0.172413	5137.35	254	41	24.546	8.10854	14.3938	0.161377	0.173373	0.169869	2.12647	1.9411	1.0955
16	ISL	Iceland	冰岛	1999	D01T02	0.1	0.1	0	1.07901	0.1966	1	.	1	.	.	.	.	.	7.6263	32381.6	2.76689	35.1777	6.7e+07	9.0e+09	40.4377	9.0e+09	32381.6	277381	2.1e+09	50.3226	65.0005	2.23767	6.7e+07	71.4	1.71275	0.029176	0.1966	5677.12	357	35	22.7181	7.59994	16.3801	0.144655	0.169756	0.168698	2.10235	1.9484	1.07901
16	ISL	Iceland	冰岛	2000	D01T02	0.1	0.1	0	1.04987	0.195338	1	.	1	.	.	.	.	.	7.91394	32096.4	2.80504	33.6664	1.6e+08	9.0e+09	46.097	9.0e+09	32096.4	281205	2.2e+09	49.7471	65.1862	2.5783	1.6e+08	74	1.80112	0.837769	0.195338	.	825	51	22.8635	6.97836	19.2973	0.359889	0.157391	0.1736	2.0562	1.95853	1.04987
16	ISL	Iceland	冰岛	2001	D01T02	0.1	0.1	0	1.04327	0.193042	1	.	1	.	.	.	.	.	7.59134	28897.4	2.84257	36.0788	1.6e+08	8.2e+09	48.3295	8.2e+09	28897.4	284968	1.9e+09	52.0714	65.4473	2.8501	1.6e+08	73.4	1.80158	3.65449	0.193042	6572.48	713	49	24.4635	7.46753	20.6634	0.233397	0.177328	0.186422	2.10699	2.0196	1.04327
16	ISL	Iceland	冰岛	2002	D01T02	0.1	0.1	0	1.07548	0.189637	1	.	1	.	.	.	.	.	7.80379	32409.2	2.86806	36.2908	9.2e+07	9.3e+09	54.5797	9.3e+09	32409.2	287523	1.9e+09	48.3345	65.6004	2.82841	9.2e+07	73.1	1.80204	8.433	0.189637	.	379	71	22.1906	7.49319	19.3827	0.406543	0.176854	0.169621	2.13519	1.98534	1.07548
16	ISL	Iceland	冰岛	2003	D01T02	0.1	0.1	0	1.11017	0.184825	1	.	1	.	.	.	.	.	7.68998	39476.7	2.88799	36.2598	3.4e+08	1.1e+10	62.3925	1.1e+10	39476.7	289521	2.5e+09	45.567	65.7099	2.70912	3.4e+08	73.5	1.84818	14.3447	0.184825	6657.36	748	57	21.2598	6.42271	19.298	0.234564	0.156423	0.151264	2.10207	1.89346	1.11017
16	ISL	Iceland	冰岛	2004	D01T02	0.1	0.1	0	1.02677	0.200333	1	.	1	.	.	.	.	.	7.94076	47335	2.91346	37.6279	7.6e+08	1.4e+10	68.2124	1.4e+10	47334.9	292074	3.4e+09	46.8851	65.8431	2.69763	7.6e+08	72.1	1.81674	19.0737	0.200333	.	463	66	21.5555	5.283	18.6952	0.518433	0.169396	0.186051	2.10628	2.05136	1.02677
16	ISL	Iceland	冰岛	2005	D01T02	0.1	0.1	0	0.952598	0.190362	1	.	1	.	.	.	.	.	7.71516	56794.9	2.95994	37.4919	3.1e+09	1.7e+10	69.8807	1.7e+10	56794.9	296734	5.0e+09	47.8848	66.0115	2.68614	3.1e+09	76.6	1.80889	26.2659	0.190362	7305.27	545	47	20.477	4.69977	19.0481	1.39646	0.141246	0.206073	2.04327	2.14495	0.952598
16	ISL	Iceland	冰岛	2006	D01T02	0.1	0.1	0	0.953789	0.198272	1	.	1	.	.	.	.	.	7.68199	57492.9	3.03024	33.1079	3.9e+09	1.7e+10	72.1246	1.8e+10	57492.9	303782	6.2e+09	54.9088	66.2852	2.8939	3.9e+09	75.8	1.73316	28.8545	0.198272	8006.67	326	45	22.0265	4.75314	24.0938	2.33075	0.150284	0.2201	2.0479	2.14712	0.953789
16	ISL	Iceland	冰岛	2007	D01T02	0.1	0.1	0	0.959022	0.182782	1	.	1	.	.	.	.	.	7.64836	69495.7	3.10789	31.8424	6.9e+09	2.2e+10	71.1184	2.2e+10	69495.7	311566	6.4e+09	53.2086	66.5814	2.54913	6.9e+09	76	1.71236	32.0747	0.182782	7235.99	53	61	19.8543	4.13253	27.0502	1.45343	0.165606	0.212299	2.09937	2.18907	0.959022
16	ISL	Iceland	冰岛	2008	D01T02	0.1	0.1	0	0.997731	0.189539	1	.	1	.	.	.	.	.	6.87629	56943.4	3.16622	35.8246	1.2e+09	1.8e+10	73.7451	1.8e+10	56943.4	317414	4.6e+09	64.1065	66.8576	2.48745	1.2e+09	75.8	1.66542	33.3686	0.189539	7423.61	31	50	22.8616	4.78331	39.8608	1.48266	0.181261	0.218823	2.17422	2.17917	0.997731
16	ISL	Iceland	冰岛	2009	D01T02	0.1	0.1	0	1.03278	0.177907	1	.	1	.	.	.	.	.	6.61855	41301.3	3.17705	35.2121	6.4e+07	1.3e+10	74.415	1.3e+10	41301.3	318499	2.0e+09	58.239	67.0663	2.59511	6.4e+07	75.9	1.50214	33.5859	0.177907	7925.98	22	64	19.8746	5.63482	35.1153	0.991647	0.190495	0.211973	2.16388	2.09521	1.03278
16	ISL	Iceland	冰岛	2010	D01T02	0.1	0.1	0	0.988381	0.168008	1	.	1	.	.	.	.	.	6.15997	43237.1	3.17248	35.0222	2.6e+08	1.4e+10	78.8184	1.4e+10	43237.1	318041	1.9e+09	61.9875	67.1974	2.50439	2.6e+08	73.7	1.43881	34.3075	0.168008	.	19	57	21.9881	6.28546	41.9969	1.02823	0.186792	0.234816	2.20879	2.23476	0.988381
16	ISL	Iceland	冰岛	2011	D01T02	0.2	0.2	0	1.00267	0.173992	1	.	1	.	.	.	.	.	5.91933	47714.6	3.18218	33.2322	1.1e+09	1.5e+10	81.4707	1.5e+10	47714.6	319014	2.3e+09	66.9311	66.9918	2.41367	1.1e+09	68.2	1.48875	34.9472	0.173992	6981.4	21	50	22.3753	6.41975	40.3101	1.93292	0.20412	0.252497	2.27225	2.26621	1.00267
16	ISL	Iceland	冰岛	2012	D01T02	0.6	0.6	0	0.983537	0.186079	1	.	1	.	.	.	.	.	5.79921	45995.5	3.19916	35.5282	1.0e+09	1.5e+10	81.9559	1.5e+10	45995.5	320716	2.4e+09	66.6779	66.7747	2.05785	1.0e+09	70.9	1.47826	35.3356	0.186079	.	7	37	21.0226	6.55174	37.708	2.01347	0.203553	0.258966	2.28303	2.32124	0.983537
16	ISL	Iceland	冰岛	2013	D01T02	0.9	0.9	0	1.01258	0.169937	1	.	1	.	.	.	.	.	6.27556	49805	3.22957	34.8336	4.7e+08	1.6e+10	80.2969	1.6e+10	49805	323764	2.5e+09	62.1269	66.532	1.70204	4.7e+08	72.1	1.48854	36.2526	0.169937	5648.36	13	33	21.0635	5.84541	37.9498	1.59882	0.193359	0.239024	2.29467	2.26617	1.01258
16	ISL	Iceland	冰岛	2014	D01T02	2.2	2.2	0	0.982115	0.191144	1	.	1	.	.	.	.	.	6.25409	54576.7	3.2657	35.4331	7.7e+08	1.8e+10	81.438	1.8e+10	54576.7	327386	3.1e+09	58.3624	66.2617	1.94811	7.7e+08	72.4	1.47499	36.5174	0.191144	.	13	51	20.7343	5.27056	39.0143	1.99096	0.182215	0.243197	2.22374	2.26424	0.982115
16	ISL	Iceland	冰岛	2015	D01T02	3.2	3.2	0	1.00146	0.213685	1	.	1	.	.	.	.	.	6.21949	52951.7	3.2999	37.5169	1.1e+09	1.8e+10	75.7661	1.8e+10	52951.7	330815	3.4e+09	57.2637	65.9729	2.19746	1.2e+09	72	1.50949	37.5871	0.213685	5887.91	6	40	20.1951	5.28067	40.2235	1.61071	0.187555	0.240347	2.23423	2.23098	1.00146
16	ISL	Iceland	冰岛	2016	D01T02	4.3	4.3	0	0.98053	0.241043	1	.	1	.	.	.	.	.	4.86139	61987.9	3.34602	.	-1100000000	2.1e+10	73.6004	2.1e+10	61987.9	335439	4.4e+09	48.6025	65.7878	2.12769	-1100000000	73.3	1.47488	38.139	0.241043	6640.46	3	35	19.5458	4.57694	36.3625	1.30877	0.165427	0.227406	2.15547	2.19827	0.98053
16	ISL	Iceland	冰岛	2017	D01T02	5.2	5.2	0	0.979382	0.252065	1	.	1	.	.	.	.	.	4.87041	72010.1	3.42544	.	-7000000000	2.5e+10	71.845	2.5e+10	72010.1	343400	5.4e+09	47.8925	65.5848	2.10455	-7000000000	74.4	1.50887	39.1768	0.252065	6130.51	8	36	19.5985	3.78159	41.5488	1.18088	0.151731	0.222153	2.15199	2.19729	0.979382
16	ISL	Iceland	冰岛	2018	D01T02	5.5	5.5	0	0.968672	0.261071	1	.	1	.	.	.	.	.	4.80777	74452.2	3.49818	.	-620000000	2.6e+10	73.1032	2.6e+10	74469.8	352721	5.8e+09	50.3863	65.3726	2.04135	-620000000	77	1.54532	39.0963	0.261071	6088.27	10	56	19.6532	3.92127	40.9998	2.01383	0.168275	0.233411	2.10609	2.17421	0.968672
17	IRL	Ireland	爱尔兰	1995	D01T02	2.4	1.4	1.1	1.11551	0.521347	1	.	1	.	.	.	.	.	9.26841	19158.5	52.3856	0.524023	1.4e+09	6.9e+10	35.9726	6.9e+10	19158.5	3.6e+06	1.3e+10	111.434	64.8107	1.29695	1.4e+09	68.5	1.47993	.	0.521347	.	.	.	28.9379	5.58019	1.10152	0.434675	0.218677	0.180866	2.63285	2.36024	1.11551
17	IRL	Ireland	爱尔兰	1996	D01T02	0.8	0.5	0.4	1.11427	0.508552	1	.	1	.	.	.	.	.	9.57281	20835.9	52.8017	0.516719	2.6e+09	7.6e+10	37.64	7.6e+10	20835.9	3.6e+06	1.5e+10	109.062	65.5546	1.27006	2.6e+09	68.5	1.51994	.	0.508552	1773.75	.	.	28.2929	4.69011	1.08898	0.408783	0.21961	0.182254	2.56995	2.30638	1.11427
17	IRL	Ireland	爱尔兰	1997	D01T02	1.4	0.8	0.6	1.1003	0.447423	1	.	1	.	.	.	.	.	9.79064	22551.1	53.3339	0.529773	2.0e+09	8.3e+10	39.438	8.3e+10	22551.1	3.7e+06	1.7e+10	109.944	66.2829	1.24317	2.0e+09	72.6	1.55994	.	0.447423	1930.23	.	.	29.6955	3.90674	1.04421	0.416004	0.225827	0.191648	2.48716	2.26043	1.1003
17	IRL	Ireland	爱尔兰	1998	D01T02	2.6	1.4	1.1	1.08344	0.352185	1	.	1	.	.	.	.	.	10.348	24294.9	53.8931	0.708577	8.9e+09	9.0e+10	42.303	9.0e+10	24294.9	3.7e+06	2.0e+10	119.204	66.9649	1.20958	8.9e+09	73.7	1.59994	.	0.352185	2093.26	.	.	31.2887	3.47535	0.801711	0.264724	0.200001	0.220813	2.4748	2.28421	1.08344
17	IRL	Ireland	爱尔兰	1999	D01T02	6.1	3.2	2.8	1.09196	0.429136	1	.	1	.	.	.	.	.	10.646	26338.1	54.5041	0.663464	1.8e+10	9.9e+10	47.306	9.9e+10	26329.2	3.8e+06	2.4e+10	119.368	67.5504	1.15338	1.8e+10	74.6	1.59236	.	0.429136	2110.97	.	.	31.371	2.57229	0.783925	0.264334	0.216412	0.218646	2.44243	2.23675	1.09196
17	IRL	Ireland	爱尔兰	2000	D01T02	7.4	3.7	3.7	1.12882	0.484198	1	.	1	.	.	.	.	.	11.1778	26334.6	55.2355	0.664902	2.6e+10	1.0e+11	49.4498	1.0e+11	26269.2	3.8e+06	2.4e+10	128.507	68.0124	1.08497	2.6e+10	76.1	1.58477	.	0.484198	2251.06	.	.	31.5013	2.50493	0.77377	0.344014	0.224675	0.216852	2.54151	2.25146	1.12882
17	IRL	Ireland	爱尔兰	2001	D01T02	3.8	1.9	1.9	1.16816	0.277837	1	.	1	.	.	.	.	.	11.5914	28282.4	56.122	0.555826	9.7e+09	1.1e+11	50.6748	1.1e+11	28257.9	3.9e+06	2.6e+10	122.095	68.474	1.05306	9.7e+09	81.2	1.56019	.	0.277837	2329.11	.	.	34.0831	1.99386	0.66595	0.320556	0.19472	0.211636	2.59094	2.21797	1.16816
17	IRL	Ireland	爱尔兰	2002	D01T02	6.7	3.5	3.2	1.15359	0.235576	1	.	1	.	.	.	.	.	11.1725	32705.4	57.0757	0.754443	2.9e+10	1.3e+11	53.5348	1.3e+11	32550.3	3.9e+06	3.0e+10	109.906	68.8297	1.05605	2.9e+10	80.5	1.5356	0.272196	0.235576	2399.18	.	.	35.1053	1.73531	0.547074	0.384909	0.186664	0.226907	2.57111	2.22879	1.15359
17	IRL	Ireland	爱尔兰	2003	D01T02	5.2	2.5	2.6	1.16182	0.241452	1	.	1	.	.	.	.	.	11.0313	41203.5	58.0131	0.695784	2.3e+10	1.6e+11	55.8462	1.6e+11	41112.8	4.0e+06	4.1e+10	89.2476	69.0778	1.12451	2.3e+10	80.9	1.4633	1.0559	0.241452	2522.31	.	.	32.259	1.48	0.834027	0.242554	0.202718	0.223845	2.61684	2.25236	1.16182
17	IRL	Ireland	爱尔兰	2004	D01T02	3.8	2.1	1.7	1.20605	0.263151	1	.	1	.	.	.	.	.	10.979	47754.2	59.0835	0.806259	-11000000000	1.9e+11	58.9219	1.9e+11	47666.5	4.1e+06	5.2e+10	85.8705	69.2272	1.17866	-11000000000	80.3	1.43092	3.77236	0.263151	2713.07	.	.	30.7661	1.57409	0.773328	0.474637	0.227952	0.229666	2.68549	2.22667	1.20605
17	IRL	Ireland	爱尔兰	2005	D01T02	4.7	2	2.6	1.0424	0.289739	1	.	1	.	.	.	.	.	11.2143	50933	60.3849	1.09621	4.7e+10	2.1e+11	58.8693	2.1e+11	50914	4.2e+06	6.3e+10	84.1472	69.2874	1.19281	4.7e+10	80.8	1.55629	7.82536	0.289739	2797.97	.	.	30.0342	1.03355	0.848373	0.698322	0.250812	0.303354	2.52806	2.42522	1.0424
17	IRL	Ireland	爱尔兰	2006	D01T02	2.9	1.5	1.5	0.96549	0.297366	1	.	1	.	.	.	.	.	11.0594	54329.2	62.035	1.42916	2.2e+10	2.3e+11	58.4412	2.3e+11	54283.7	4.3e+06	7.2e+10	78.3857	69.1576	1.19836	2.2e+10	82.2	1.56571	13.2639	0.297366	2877.12	.	.	30.0804	0.921153	1.35003	0.647973	0.231629	0.343453	2.5779	2.67005	0.96549
17	IRL	Ireland	爱尔兰	2007	D01T02	6.1	2.5	3.6	0.962392	0.411567	1	.	1	.	.	.	.	.	10.5379	61396.4	63.8546	1.52205	6.0e+10	2.7e+11	58.302	2.7e+11	61318.5	4.4e+06	7.7e+10	76.1355	68.9741	1.23325	6.0e+10	82.6	1.58597	17.4025	0.411567	2935.43	.	.	28.5266	1.04322	1.31431	0.757906	0.252547	0.35241	2.52024	2.61873	0.962392
17	IRL	Ireland	爱尔兰	2008	D01T02	14.6	5.3	9.3	0.868457	0.408283	1	.	1	.	.	.	.	.	10.197	61353.1	65.1697	1.90038	2.3e+10	2.7e+11	54.0175	2.7e+11	61103.5	4.5e+06	6.8e+10	76.4358	68.7418	1.38766	2.3e+10	82.5	1.58147	20.0172	0.408283	3284.06	.	.	25.9255	0.850029	1.07591	0.940161	0.274466	0.389127	2.46352	2.83666	0.868457
17	IRL	Ireland	爱尔兰	2009	D01T02	5	2.3	2.7	0.85551	0.321309	1	.	1	.	.	.	.	.	8.94405	52133.1	65.835	2.32862	5.4e+10	2.4e+11	56.504	2.4e+11	51927.2	4.5e+06	5.0e+10	75.8492	68.4789	1.6082	5.4e+10	82.2	1.49251	21.6984	0.321309	3156.92	.	.	25.6114	0.558324	0.768182	0.679163	0.30609	0.43511	2.51768	2.9429	0.85551
17	IRL	Ireland	爱尔兰	2010	D01T02	8.2	3.6	4.7	0.897723	0.434233	1	.	1	.	.	.	.	.	8.81297	48663.6	66.1947	2.10765	3.8e+10	2.2e+11	63.1264	2.2e+11	48607.9	4.6e+06	3.9e+10	79.7497	68.2043	1.59153	3.8e+10	81.3	1.46189	22.5427	0.434233	3112.65	.	.	23.3396	0.954541	1.13574	1.13012	0.318202	0.411931	2.40609	2.68022	0.897723
17	IRL	Ireland	爱尔兰	2011	D01T02	25.2	8.4	16.8	0.910437	0.450006	1	.	1	.	.	.	.	.	8.00887	52183.1	66.484	3.39437	2.4e+10	2.4e+11	67.7986	2.4e+11	52108.8	4.6e+06	4.0e+10	80.5932	67.6057	1.56058	2.4e+10	78.7	1.43833	23.562	0.450006	3325.78	.	.	24.0366	1.21048	1.35938	1.45265	0.304936	0.398083	2.4016	2.63785	0.910437
17	IRL	Ireland	爱尔兰	2012	D01T02	17.1	5.9	11.3	0.910591	0.476235	1	.	1	.	.	.	.	.	8.0721	49054.7	66.7663	3.25738	5.8e+10	2.3e+11	68.1972	2.3e+11	49028.8	4.6e+06	4.4e+10	79.6161	67.019	1.56119	5.8e+10	76.9	1.42995	24.3635	0.476235	4853.96	.	.	23.9433	0.985494	1.25216	1.76087	0.335611	0.421181	2.55987	2.81122	0.910591
17	IRL	Ireland	爱尔兰	2013	D01T02	24.3	7.3	17	0.878084	0.506128	1	.	1	.	.	.	.	.	7.72291	51546.4	67.1188	3.69283	7.1e+10	2.4e+11	71.6995	2.4e+11	51518.4	4.6e+06	4.4e+10	79.2451	66.4457	1.5658	7.1e+10	75.7	1.42522	25.9154	0.506128	5136.48	.	.	23.8749	1.08292	1.30319	0.922547	0.31133	0.433339	2.4908	2.83663	0.878084
17	IRL	Ireland	爱尔兰	2014	D01T02	24.6	8.5	16.2	0.949813	0.433876	1	.	1	.	.	.	.	.	7.62715	55643.1	67.6113	4.22177	9.7e+10	2.6e+11	73.8132	2.6e+11	55525.9	4.7e+06	5.3e+10	78.5202	65.8828	1.52307	9.7e+10	76.2	1.51942	27.2331	0.433876	5304.48	.	.	24.3057	1.24313	1.29763	0.914115	0.324627	0.407892	2.4737	2.60441	0.949813
17	IRL	Ireland	爱尔兰	2015	D01T02	28.2	9.5	18.7	0.897361	0.464992	1	.	1	.	.	.	.	.	7.88246	62054	68.2531	4.80015	2.4e+11	2.9e+11	77.2321	2.9e+11	61987.6	4.7e+06	7.0e+10	68.7354	65.3362	1.18267	2.4e+11	76.6	1.49756	28.0655	0.464992	5270.66	.	.	38.1522	0.894029	1.06082	0.68761	0.358675	0.414279	2.30383	2.56734	0.897361
17	IRL	Ireland	爱尔兰	2016	D01T02	68	18.5	49.5	0.848555	0.689356	1	.	1	.	.	.	.	.	8.16447	62895.9	69.0279	.	1.0e+11	3.0e+11	77.5571	3.0e+11	62819	4.8e+06	1.1e+11	70.9846	65.0971	1.16892	1.0e+11	77.3	1.38533	28.8436	0.689356	5178.24	70	79	36.9044	0.944965	0.830317	0.579429	0.377746	0.418943	2.13944	2.52128	0.848555
17	IRL	Ireland	爱尔兰	2017	D01T02	50	15	35	0.877019	0.702729	1	.	1	.	.	.	.	.	7.85843	69970.9	69.7835	.	5.8e+10	3.3e+11	77.7806	3.4e+11	69601.7	4.8e+06	1.1e+11	68.9048	64.8901	1.15769	5.8e+10	76.7	1.35803	29.3135	0.702729	5142.77	75	62	35.9355	1.17797	1.05125	0.808445	0.361577	0.400607	2.08969	2.38272	0.877019
17	IRL	Ireland	爱尔兰	2018	D01T02	113.2	31.9	81.3	0.819771	0.761304	1	.	1	.	.	.	.	.	7.73767	79250.4	70.6534	.	6.7e+10	3.8e+11	77.2829	3.9e+11	79069	4.9e+06	1.1e+11	70.7965	64.7278	1.14647	6.7e+10	80.4	1.39611	29.5823	0.761304	4733.22	32	76	36.749	0.891399	1.01928	0.726723	0.395961	0.430411	2.10232	2.56452	0.819771
18	ISR	Isreal	以色列	1995	D01T02	0.8	0.6	0.1	0.97447	1.17841	1	.	1	.	.	.	.	.	8.43558	18916.7	256.238	2.99066	1.4e+09	1.0e+11	40.3222	1.0e+11	18166.8	5.5e+06	2.5e+10	48.2703	61.2317	2.37372	1.4e+09	61.5	0.685479	.	1.17841	.	3159	1266	23.5654	2.05502	1.40115	0.023693	0.151138	0.153818	1.79463	1.84165	0.97447
18	ISR	Isreal	以色列	1996	D01T02	0.9	0.7	0.2	0.938669	1.14946	1	.	1	.	.	.	.	.	8.56186	20117.3	263.031	3.05173	1.4e+09	1.1e+11	42.5192	1.1e+11	19400.7	5.7e+06	2.8e+10	47.2975	61.4525	2.59054	1.4e+09	62	0.673786	.	1.14946	.	2101	1218	23.987	1.91339	1.23428	0.512173	0.14263	0.168116	1.82431	1.94351	0.938669
18	ISR	Isreal	以色列	1997	D01T02	1.1	0.8	0.3	0.921242	1.07238	1	.	1	.	.	.	.	.	8.73328	20366.9	269.686	3.04922	1.6e+09	1.1e+11	44.9375	1.2e+11	19701.3	5.8e+06	2.8e+10	46.3441	61.6065	2.80736	1.6e+09	62.7	0.662093	.	1.07238	.	1445	1441	24.2725	1.81806	1.19172	0.525828	0.140795	0.169991	1.80899	1.96365	0.921242
18	ISR	Isreal	以色列	1998	D01T02	1.6	1.2	0.4	0.975118	1.04511	1	.	1	.	.	.	.	.	8.62581	20106.8	275.924	3.12375	1.7e+09	1.2e+11	47.3558	1.2e+11	19462.1	6.0e+06	2.6e+10	45.0356	61.7097	2.91897	1.7e+09	68	0.650401	.	1.04511	.	3106	1950	23.7029	2.01018	1.35636	0.50337	0.136742	0.147631	1.81116	1.85738	0.975118
18	ISR	Isreal	以色列	1999	D01T02	2.5	2	0.5	0.902423	1.12007	1	.	1	.	.	.	.	.	8.65038	19742.4	283.041	3.22517	4.2e+09	1.2e+11	48.9787	1.2e+11	19163	6.1e+06	2.6e+10	50.2328	61.7986	3.33008	4.2e+09	68.3	0.656078	.	1.12007	.	3904	2053	22.9482	1.74413	1.29986	0.522021	0.148821	0.186157	1.80127	1.99604	0.902423
18	ISR	Isreal	以色列	2000	D01T02	3.9	2.8	1.2	0.900764	1.21831	1	.	1	.	.	.	.	.	9.06301	21630.6	290.619	3.28055	8.0e+09	1.3e+11	50.0106	1.3e+11	21101.2	6.3e+06	2.8e+10	52.0627	61.8921	3.93329	8.1e+09	65.5	0.661754	.	1.21831	.	5203	1599	23.0521	1.54021	1.22231	0.023816	0.18217	0.19561	1.83223	2.03408	0.900764
18	ISR	Isreal	以色列	2001	D01T02	3.6	2.6	1	0.932276	1.21956	1	.	1	.	.	.	.	.	9.00023	20909.7	297.551	3.27544	1.8e+09	1.3e+11	52.3479	1.3e+11	20353.6	6.4e+06	2.7e+10	49.2129	61.9243	4.18499	1.8e+09	66.1	0.622529	0.703192	1.21956	.	5521	1248	21.7048	1.76499	1.27628	0.025656	0.163667	0.173431	1.79119	1.92131	0.932276
18	ISR	Isreal	以色列	2002	D01T02	4.4	2.8	1.6	0.936293	1.25426	1	.	1	.	.	.	.	.	9.29689	19035	303.604	3.50462	1.6e+09	1.2e+11	57.4234	1.2e+11	18479.7	6.6e+06	2.4e+10	53.4249	61.9886	4.13067	1.6e+09	66.9	0.583304	3.6444	1.25426	.	5095	1213	21.431	1.81955	1.25745	0.039991	0.167496	0.181171	1.80294	1.92562	0.936293
18	ISR	Isreal	以色列	2003	D01T02	4.7	3	1.7	0.897179	1.20266	1	.	1	.	.	.	.	.	9.40633	19627	309.136	3.51164	3.3e+09	1.3e+11	57.4014	1.3e+11	19033.8	6.7e+06	2.4e+10	53.4728	62.0619	3.89304	3.3e+09	62.7	0.554657	9.77623	1.20266	.	4569	1329	21.1773	1.70886	1.26223	0.037074	0.161445	0.194009	1.8099	2.01732	0.897179
18	ISR	Isreal	以色列	2004	D01T02	5.6	2.8	2.8	0.880389	1.30025	1	.	1	.	.	.	.	.	9.27594	20557.2	314.649	3.78349	2.9e+09	1.4e+11	57.1303	1.4e+11	19933.6	6.8e+06	2.6e+10	60.0332	62.1125	3.87344	3.0e+09	61.4	0.536572	14.8575	1.30025	.	4870	1544	20.4559	1.61684	1.27358	0.026023	0.177793	0.212923	1.84493	2.09559	0.880389
18	ISR	Isreal	以色列	2005	D01T02	6.8	3	3.8	0.915708	1.35563	1	.	1	.	.	.	.	.	8.80397	21223.9	320.245	3.94175	4.8e+09	1.4e+11	58.7431	1.4e+11	20585.6	6.9e+06	2.7e+10	61.4844	62.1262	4.04819	4.8e+09	62.6	0.492389	18.314	1.35563	.	5157	1669	21.2004	1.88293	1.08445	0.058722	0.170491	0.199896	1.852	2.02248	0.915708
18	ISR	Isreal	以色列	2006	D01T02	11.7	4.5	7.2	0.905431	1.32839	1	.	1	.	.	.	.	.	9.12018	22494.6	325.957	3.62698	1.4e+10	1.5e+11	58.3329	1.5e+11	21854.9	7.1e+06	3.0e+10	61.0459	62.2706	4.14097	1.4e+10	64.4	0.612518	20.7989	1.32839	.	6154	1342	21.4731	1.82073	1.22099	0.0989	0.168627	0.209297	1.86434	2.05906	0.905431
18	ISR	Isreal	以色列	2007	D01T02	11.9	4.3	7.6	0.870474	1.41633	1	.	1	.	.	.	.	.	9.27534	25633.7	331.798	3.59909	8.8e+09	1.8e+11	61.2148	1.8e+11	24939.5	7.2e+06	3.6e+10	61.5392	62.3577	4.42235	8.8e+09	64.8	0.584655	21.9865	1.41633	.	6394	1615	21.7787	1.75218	1.16541	0.151947	0.17062	0.224002	1.85383	2.12968	0.870474
18	ISR	Isreal	以色列	2008	D01T02	8.1	3.3	4.9	0.860092	1.11349	1	.	1	.	.	.	.	.	9.12708	30173.2	337.745	4.66012	1.0e+10	2.2e+11	60.424	2.2e+11	29599.8	7.3e+06	4.3e+10	57.9443	62.3899	4.34227	1.0e+10	66.3	0.608108	23.8037	1.11349	.	6214	1528	21.2753	1.81424	1.36844	0.911526	0.13155	0.212547	1.85628	2.15823	0.860092
18	ISR	Isreal	以色列	2009	D01T02	4.9	2.4	2.5	0.891556	0.956795	1	.	1	.	.	.	.	.	8.78055	28316.8	345.915	4.86869	4.6e+09	2.1e+11	63.1492	2.1e+11	27719.8	7.5e+06	3.9e+10	45.7173	62.3692	4.13293	4.6e+09	67.6	0.495322	23.9315	0.956795	.	5387	1387	20.4601	2.15491	1.15209	0.045875	0.094865	0.164917	1.74569	1.95802	0.891556
18	ISR	Isreal	以色列	2010	D01T02	21.9	8.3	13.6	0.866038	1.00053	1	.	1	.	.	.	.	.	9.25026	31266.6	352.292	4.88473	7.0e+09	2.3e+11	65.9261	2.3e+11	30694.2	7.6e+06	4.4e+10	50.0513	62.2879	3.93541	7.0e+09	67.7	0.587062	24.0433	1.00053	.	5856	1450	20.7091	1.83894	1.42795	0.865285	0.111826	0.183318	1.7699	2.04368	0.866038
18	ISR	Isreal	以色列	2011	D01T02	18.5	7.1	11.4	0.871917	0.969488	1	.	1	.	.	.	.	.	8.99106	34354.7	358.863	4.84752	8.7e+09	2.6e+11	66.5856	2.6e+11	33610.7	7.8e+06	5.4e+10	53.7883	62.0503	4.01532	8.7e+09	68.5	0.654826	25.1889	0.969488	.	5526	1360	20.0366	1.85641	1.46039	0.971529	0.120554	0.191328	1.77713	2.03819	0.871917
18	ISR	Isreal	以色列	2012	D01T02	12.8	6.2	6.6	0.79536	0.953568	1	.	1	.	.	.	.	.	9.61547	33156.2	365.55	4.69774	9.0e+09	2.6e+11	68.5746	2.6e+11	32510.3	7.9e+06	5.4e+10	52.6731	61.7831	4.16147	9.0e+09	67.8	0.644034	25.5133	0.953568	.	5473	1319	20.3948	1.49588	1.45455	1.70033	0.122833	0.230815	1.77052	2.22606	0.79536
18	ISR	Isreal	以色列	2013	D01T02	38.3	13.3	25	0.826408	0.831719	1	.	1	.	.	.	.	.	8.31348	36941.8	372.435	4.96383	1.2e+10	2.9e+11	67.0438	2.9e+11	36316.5	8.1e+06	6.0e+10	47.049	61.4942	4.0961	1.2e+10	66.9	0.642546	25.9232	0.831719	.	4984	1201	20.5113	1.51937	1.18203	1.57984	0.103583	0.194393	1.77232	2.14461	0.826408
18	ISR	Isreal	以色列	2014	D01T02	23.5	11.8	11.7	0.789277	0.833449	1	.	1	.	.	.	.	.	7.87733	38259.7	379.653	5.19155	6.0e+09	3.1e+11	66.9425	3.1e+11	37738.4	8.2e+06	6.2e+10	45.1502	61.1984	4.17398	6.1e+09	68.4	0.681375	27.0987	0.833449	.	5148	1125	19.8243	1.38818	1.18246	1.14301	0.096924	0.195981	1.71579	2.17387	0.789277
18	ISR	Isreal	以色列	2015	D01T02	20	11.9	8.1	0.808231	0.763998	1	.	1	.	.	.	.	.	7.89275	36206.5	387.25	5.24532	1.1e+10	3.0e+11	65.4869	3.0e+11	35813.7	8.4e+06	5.7e+10	42.0255	60.9126	4.26525	1.1e+10	70.5	0.735946	27.1361	0.763998	.	5623	1285	19.8227	1.41849	0.962617	0.791843	0.095995	0.184897	1.68428	2.08391	0.808231
18	ISR	Isreal	以色列	2016	D01T02	34.7	14.8	19.9	0.795525	0.750155	1	.	1	.	.	.	.	.	7.60358	37690.5	394.917	.	1.2e+10	3.2e+11	64.9002	3.2e+11	37282.5	8.5e+06	6.5e+10	39.6662	60.6011	4.51177	1.2e+10	70.7	0.818195	27.6749	0.750155	.	5119	1300	18.9735	1.44863	0.963441	1.38775	0.090144	0.187025	1.66129	2.08829	0.795525
18	ISR	Isreal	以色列	2017	D01T02	35.9	16.3	19.7	0.787808	0.723096	1	.	1	.	.	.	.	.	7.53029	41114.8	402.648	.	1.7e+10	3.5e+11	63.3547	3.5e+11	40474.7	8.7e+06	7.2e+10	36.9404	60.3299	4.81623	1.7e+10	69.7	0.719001	28.1854	0.723096	.	5377	1436	18.3861	1.43197	1.09444	1.43726	0.088237	0.191304	1.66982	2.11957	0.787808
18	ISR	Isreal	以色列	2018	D01T02	42	18.5	23.5	0.788142	0.717264	1	.	1	.	.	.	.	.	6.87584	42406.8	410.481	.	2.2e+10	3.7e+11	61.4769	3.7e+11	41704.8	8.9e+06	8.0e+10	37.3999	60.0978	4.94079	2.2e+10	72.2	0.659118	28.7945	0.717264	.	5857	1506	18.6133	1.38557	1.15445	2.26461	0.090402	0.20598	1.65889	2.10481	0.788142
19	ITA	Italy	意大利	1995	D01T02	1.2	0.8	0.4	1.28151	0.405335	1	.	1	.	.	.	.	.	7.32554	20664.6	193.276	2.38571	4.8e+09	1.2e+12	41.4789	1.2e+12	20664.6	5.7e+07	2.3e+11	37.4368	68.438	0.90411	4.8e+09	61.2	0.914021	.	0.405335	.	.	.	26.3611	2.97771	1.42416	1.2477	0.074562	0.076371	2.19408	1.7121	1.28151
19	ITA	Italy	意大利	1996	D01T02	6.2	5.8	0.3	1.27645	0.401426	1	.	1	.	.	.	.	.	7.24853	23081.6	193.33	2.64953	3.5e+09	1.3e+12	42.3378	1.3e+12	23081.6	5.7e+07	2.5e+11	35.0919	68.2674	0.9459	3.6e+09	60.8	0.900067	.	0.401426	1339.54	1678	6997	25.9216	2.97459	1.27955	1.2253	0.071661	0.071301	2.17214	1.70171	1.27645
19	ITA	Italy	意大利	1997	D01T02	6.7	6.5	0.2	1.28127	0.397422	1	.	1	.	.	.	.	.	7.30382	21829.3	193.432	2.6142	3.7e+09	1.2e+12	46.8525	1.2e+12	21829.3	5.7e+07	2.4e+11	36.2794	68.091	0.98769	3.7e+09	58.1	0.886114	.	0.397422	1154.48	.	.	25.5248	2.86191	1.2963	1.42418	0.074002	0.073607	2.17671	1.69887	1.28127
19	ITA	Italy	意大利	1998	D01T02	7.3	7	0.4	1.2773	0.413333	1	.	1	.	.	.	.	.	7.49247	22318.1	193.488	2.55631	2.6e+09	1.3e+12	48.3126	1.3e+12	22318.1	5.7e+07	2.5e+11	36.5549	67.899	1.00487	2.6e+09	59.1	0.87216	.	0.413333	1151.76	.	.	25.2645	2.76886	1.28265	1.10087	0.073754	0.071993	2.15704	1.68875	1.2773
19	ITA	Italy	意大利	1999	D01T02	8.5	7.8	0.7	1.25895	0.447698	1	.	1	.	.	.	.	.	7.60785	22005.1	193.521	2.76502	6.9e+09	1.3e+12	48.5551	1.3e+12	21997.6	5.7e+07	2.5e+11	36.4371	67.6712	0.98065	6.9e+09	61.6	0.865101	.	0.447698	1149.01	1172	6281	24.6818	2.72223	1.27393	1.19363	0.071137	0.071331	2.1275	1.6899	1.25895
19	ITA	Italy	意大利	2000	D01T02	9.4	8.5	0.9	1.23625	0.476346	1	.	1	.	.	.	.	.	7.66211	20137.6	192.555	2.68865	1.3e+10	1.1e+12	49.8113	1.1e+12	20087.6	5.7e+07	2.4e+11	41.9009	67.391	1.00364	1.3e+10	61.9	0.858043	0.201873	0.476346	1166.12	1396	7877	24.3093	2.56361	1.38879	2.02151	0.079531	0.083982	2.13851	1.72984	1.23625
19	ITA	Italy	意大利	2001	D01T02	8.5	7.7	0.8	1.22586	0.489342	1	.	1	.	.	.	.	.	7.66263	20501	192.664	2.88077	1.5e+10	1.2e+12	52.8773	1.2e+12	20483.2	5.7e+07	2.4e+11	41.1915	67.1781	1.0407	1.5e+10	63	0.840244	0.684271	0.489342	1172.78	.	.	24.1208	2.48963	1.33331	1.91041	0.083104	0.084761	2.13572	1.74223	1.22586
19	ITA	Italy	意大利	2002	D01T02	7.8	7.3	0.5	1.20069	0.479931	1	.	1	.	.	.	.	.	7.77218	22376.3	192.951	2.52275	1.7e+10	1.3e+12	55.5518	1.3e+12	22270.1	5.7e+07	2.7e+11	39.4615	66.9171	1.08124	1.7e+10	63.6	0.822445	1.48842	0.479931	1245.87	.	.	24.0295	2.37138	1.3235	1.74601	0.078689	0.085277	2.11045	1.75769	1.20069
19	ITA	Italy	意大利	2003	D01T02	9.2	8.5	0.7	1.19623	0.482382	1	.	1	.	.	.	.	.	8.06442	27526.3	193.81	2.31867	2.0e+10	1.6e+12	58.6772	1.6e+12	27465.7	5.7e+07	3.3e+11	37.9159	66.636	1.05894	2.0e+10	64.3	0.754255	3.91814	0.482382	1221.8	.	.	23.4794	2.35796	1.29515	2.1359	0.075327	0.083777	2.09593	1.75212	1.19623
19	ITA	Italy	意大利	2004	D01T02	6.2	4.6	1.6	1.16413	0.450293	1	.	1	.	.	.	.	.	8.18934	31317.2	195.069	2.59784	2.0e+10	1.8e+12	62.243	1.8e+12	31259.7	5.8e+07	3.8e+11	39.323	66.3799	1.05025	2.0e+10	64.2	0.694406	8.16531	0.450293	1242.69	.	.	23.419	2.34703	1.43449	2.34086	0.071146	0.085966	2.05273	1.76331	1.16413
19	ITA	Italy	意大利	2005	D01T02	5.3	4	1.3	1.13826	0.483944	1	.	1	.	.	.	.	.	8.17381	32055.1	196.03	2.32841	3.7e+10	1.9e+12	64.4384	1.9e+12	32043.1	5.8e+07	4.0e+11	40.803	66.1733	1.04435	3.7e+10	64.9	0.672687	11.722	0.483944	1415.36	.	.	23.2716	2.0336	1.48703	3.43872	0.077988	0.098026	2.07264	1.82088	1.13826
19	ITA	Italy	意大利	2006	D01T02	8.2	6	2.3	1.12274	0.466662	1	.	1	.	.	.	.	.	8.02584	33529.7	196.62	2.43668	5.7e+10	1.9e+12	66.1078	2.0e+12	33501.7	5.8e+07	4.2e+11	44.1204	65.9721	1.08401	5.7e+10	62	0.635002	14.5429	0.466662	1510.52	.	.	23.401	1.94584	2.05581	3.60007	0.081258	0.108283	2.0706	1.84424	1.12274
19	ITA	Italy	意大利	2007	D01T02	12.9	7.9	5	1.10561	0.47038	1	.	1	.	.	.	.	.	7.86079	37870.7	197.615	2.30201	6.6e+10	2.2e+12	66.683	2.2e+12	37822.7	5.8e+07	4.8e+11	45.7652	65.8447	1.12899	6.6e+10	62.8	0.585551	17.2208	0.47038	1583.04	870	9255	23.7719	1.89629	1.99555	3.92042	0.086563	0.112685	2.08348	1.88446	1.10561
19	ITA	Italy	意大利	2008	D01T02	20.3	11	9.4	1.03699	0.481579	1	.	1	.	.	.	.	.	7.56432	40944.9	198.928	2.77311	-9500000000	2.4e+12	66.3436	2.4e+12	40778.3	5.9e+07	5.1e+11	46.0497	65.758	1.15972	-9500000000	62.6	0.593476	19.0399	0.481579	1625.3	861	8588	23.6014	1.87462	1.80554	4.69331	0.087192	0.126975	2.0233	1.95113	1.03699
19	ITA	Italy	意大利	2009	D01T02	19.3	10.3	9	1.02016	0.484116	1	.	1	.	.	.	.	.	6.71892	37226.8	199.837	3.52143	1.7e+10	2.2e+12	66.55	2.2e+12	37079.8	5.9e+07	4.4e+11	37.5136	65.654	1.21787	1.7e+10	61.4	0.56272	20.2887	0.484116	1723.02	903	8814	21.8848	1.80274	1.64167	3.44793	0.074556	0.112333	1.96778	1.92888	1.02016
19	ITA	Italy	意大利	2010	D01T02	40.4	19.4	21.1	0.97653	0.515794	1	.	1	.	.	.	.	.	6.83688	36035.6	200.453	3.74133	9.9e+09	2.1e+12	65.7743	2.1e+12	36000.5	5.9e+07	4.3e+11	43.7836	65.4944	1.21797	9.9e+09	62.7	0.55537	21.8948	0.515794	1743.34	846	8877	21.8658	1.77551	2.15313	4.63889	0.084504	0.130058	1.91468	1.9607	0.97653
19	ITA	Italy	意大利	2011	D01T02	68.4	27.7	40.6	0.997738	0.480691	1	.	1	.	.	.	.	.	6.68055	38649.6	200.798	4.30942	3.4e+10	2.3e+12	65.5631	2.3e+12	38599.1	5.9e+07	4.5e+11	47.2098	65.2712	1.20155	3.5e+10	60.3	0.526114	22.5214	0.480691	1781.39	927	8794	21.7497	1.88343	2.27014	4.76073	0.091279	0.134622	1.95614	1.96057	0.997738
19	ITA	Italy	意大利	2012	D01T02	50.5	24.4	26.1	1.03975	0.472674	1	.	1	.	.	.	.	.	6.32766	35051.5	201.34	4.89993	3.5e+07	2.1e+12	64.1336	2.1e+12	35053.5	6.0e+07	3.8e+11	47.4303	65.0202	1.26219	3.5e+07	58.8	0.510864	22.8665	0.472674	1848.63	871	8439	21.3451	1.97075	2.06269	4.69948	0.09346	0.130477	2.02244	1.94512	1.03975
19	ITA	Italy	意大利	2013	D01T02	74.8	33.2	41.7	1.07601	0.486973	1	.	1	.	.	.	.	.	5.75188	35560.1	203.687	6.1319	2.0e+10	2.1e+12	62.2962	2.1e+12	35550	6.0e+07	3.7e+11	46.5936	64.7593	1.30107	2.0e+10	60.6	0.524575	23.2339	0.486973	1930.69	905	8307	21.1725	2.14459	1.98672	4.27732	0.095188	0.120933	2.03867	1.89466	1.07601
19	ITA	Italy	意大利	2014	D01T02	106.1	52.9	53.3	1.06122	0.475694	1	.	1	.	.	.	.	.	5.38744	35565.7	205.565	7.06293	1.7e+10	2.2e+12	61.7028	2.2e+12	35518.4	6.1e+07	3.6e+11	46.509	64.5245	1.3384	1.7e+10	60.9	0.470201	23.8425	0.475694	1956.36	781	8601	20.7984	1.99786	2.00835	3.73904	0.095878	0.122729	2.03109	1.91392	1.06122
19	ITA	Italy	意大利	2015	D01T02	104.8	53.9	50.8	1.07976	0.514998	1	.	1	.	.	.	.	.	5.56329	30242.4	205.367	6.32722	1.3e+10	1.8e+12	60.9395	1.8e+12	30230.2	6.1e+07	3.1e+11	47.2743	64.336	1.3385	1.3e+10	61.7	0.479795	24.7376	0.514998	2077.88	.	.	20.8564	2.06524	1.93642	3.29441	0.098551	0.115826	2.01403	1.86526	1.07976
19	ITA	Italy	意大利	2016	D01T02	92.8	49.3	43.5	1.05737	0.505183	1	.	1	.	.	.	.	.	5.49824	30960.7	205.018	.	2.6e+10	1.9e+12	60.9373	1.9e+12	30939.7	6.1e+07	3.2e+11	46.3016	64.1605	1.36642	2.6e+10	61.2	0.51039	25.8876	0.505183	2204.08	973	8848	21.2179	1.92837	1.90982	2.66359	0.099867	0.111319	1.97569	1.8685	1.05737
19	ITA	Italy	意大利	2017	D01T02	101.5	55.3	46.2	1.06301	0.516751	1	.	1	.	.	.	.	.	5.43791	32406.7	204.711	.	1.1e+10	2.0e+12	61.933	2.0e+12	32326.7	6.1e+07	3.4e+11	49.0835	64.0252	1.37013	1.1e+10	62.5	0.513282	27.6421	0.516751	2313.65	1031	8643	21.3004	1.97268	2.07231	3.27256	0.103494	0.116803	1.98664	1.86888	1.06301
19	ITA	Italy	意大利	2018	D01T02	105.6	59.6	46	1.05893	0.528624	1	.	1	.	.	.	.	.	5.37694	34622.2	204.322	.	4.4e+10	2.1e+12	64.2916	2.1e+12	34608.7	6.0e+07	3.7e+11	50.3447	63.9192	1.39181	4.4e+10	62.5	0.487412	28.655	0.528624	2512.19	900	8921	21.4502	1.94542	2.09662	3.47059	0.105985	0.122176	1.98937	1.87865	1.05893
20	JPN	Japan	日本	1995	D01T02	12.3	4.9	7.4	1.24815	0.024125	1	.	1	.	.	.	.	.	9.33286	44197.6	344.136	16.94	4.1e+07	5.5e+12	39.1106	5.6e+12	44197.6	1.3e+08	1.7e+12	14.0472	69.4563	2.61444	4.1e+07	75	1.0859	.	0.024125	.	34603	334612	34.3164	1.64503	1.04925	0.562942	0.015616	0.048581	2.23708	1.79232	1.24815
20	JPN	Japan	日本	1996	D01T02	14.8	6.3	8.5	1.23202	0.025999	1	.	1	.	.	.	.	.	9.42034	39150.1	345.012	17.1441	-38000000	4.9e+12	40.9261	4.9e+12	39150	1.3e+08	1.6e+12	15.4376	69.2709	2.69206	-38000000	72.6	1.07633	.	0.025999	4874.8	36514	340101	34.286	1.65353	1.07939	0.474366	0.016227	0.055889	2.15835	1.75188	1.23202
20	JPN	Japan	日本	1997	D01T02	23.2	8.9	14.3	1.19268	0.034843	1	.	1	.	.	.	.	.	9.30238	35638.2	345.835	17.9416	2.5e+09	4.5e+12	42.7415	4.5e+12	35638.2	1.3e+08	1.4e+12	16.9108	69.0427	2.76968	2.5e+09	70.3	1.06675	.	0.034843	4928.9	40765	350807	33.9287	1.52791	1.14579	0.45385	0.018576	0.062854	2.146	1.79931	1.19268
20	JPN	Japan	日本	1998	D01T02	43.1	18.1	25.1	1.21278	0.048805	1	.	1	.	.	.	.	.	8.9423	32423.8	346.776	18.984	2.5e+09	4.1e+12	44.557	4.1e+12	32423.8	1.3e+08	1.2e+12	16.3092	68.7865	2.87363	2.5e+09	70.2	1.05718	0.025335	0.048805	5135.76	42551	359381	33.377	1.60329	1.22558	0.318688	0.019061	0.05621	2.11753	1.74601	1.21278
20	JPN	Japan	日本	1999	D01T02	46.1	15.8	30.4	1.19767	0.055786	1	.	1	.	.	.	.	.	9.20245	36610.2	347.41	17.7794	1.5e+10	4.6e+12	46.2263	4.6e+12	36610.2	1.3e+08	1.3e+12	15.6947	68.5151	2.89283	1.5e+10	69.1	1.09406	0.170677	0.055786	5174.98	45475	360180	32.8723	1.57606	1.2156	0.293461	0.017653	0.051791	2.09661	1.75058	1.19767
20	JPN	Japan	日本	2000	D01T02	65	20.3	44.8	1.15638	0.068852	1	.	1	.	.	.	.	.	9.32339	39169.4	347.992	17.7364	1.1e+10	5.0e+12	47.2473	5.0e+12	39169.4	1.3e+08	1.4e+12	17.2846	68.2317	2.90569	1.1e+10	70.7	1.13095	0.673998	0.068852	5078.03	49501	387364	32.5136	1.51788	1.23443	0.317131	0.019444	0.055524	2.06445	1.78526	1.15638
20	JPN	Japan	日本	2001	D01T02	51.3	16.1	35.2	1.16778	0.056666	1	.	1	.	.	.	.	.	9.20482	34406.2	348.831	17.8627	4.9e+09	4.4e+12	48.2684	4.4e+12	34406.2	1.3e+08	1.2e+12	17.2031	67.9136	2.97183	4.9e+09	70.9	1.06029	3.01812	0.056666	5113.16	52408	386767	30.9812	1.36751	1.36019	0.374143	0.020275	0.062556	2.14766	1.8391	1.16778
20	JPN	Japan	日本	2002	D01T02	50.8	17.7	33.1	1.16971	0.050048	1	.	1	.	.	.	.	.	9.46757	32820.8	349.643	16.6045	1.2e+10	4.2e+12	49.2895	4.2e+12	32820.8	1.3e+08	1.1e+12	18.0241	67.6031	3.01394	1.2e+10	66.7	0.989632	7.38201	0.050048	4871.53	51586	369458	30.2226	1.37649	1.30458	0.336839	0.02046	0.061151	2.14034	1.82981	1.16971
20	JPN	Japan	日本	2003	D01T02	50.4	18.8	31.5	1.17795	0.039918	1	.	1	.	.	.	.	.	9.51273	35387	350.392	14.058	8.8e+09	4.5e+12	50.3105	4.5e+12	35387	1.3e+08	1.2e+12	18.9122	67.2818	3.04295	8.8e+09	67.6	1.13961	11.6995	0.039918	5094.31	54909	358184	30.0789	1.29903	1.3284	0.330278	0.021263	0.062921	2.16466	1.83765	1.17795
20	JPN	Japan	日本	2004	D01T02	42.5	14.8	27.7	1.14984	0.031561	1	.	1	.	.	.	.	.	9.46963	38299	350.51	15.7436	7.5e+09	4.9e+12	51.3316	4.9e+12	38299	1.3e+08	1.2e+12	20.85	66.9246	3.02952	7.5e+09	64.3	1.17741	15.3184	0.031561	5099.26	54665	368416	29.9669	1.23096	1.55316	0.404433	0.022101	0.070791	2.17523	1.89176	1.14984
20	JPN	Japan	日本	2005	D01T02	37.9	16.1	21.7	1.16346	0.071543	1	.	1	.	.	.	.	.	9.492	37812.9	350.543	16.6844	5.5e+09	4.8e+12	52.3527	4.8e+12	37812.9	1.3e+08	1.3e+12	22.9911	66.5178	3.18099	5.5e+09	67.3	1.17449	18.2327	0.071543	5303.92	59118	367960	29.8717	1.11163	1.74673	0.748696	0.030378	0.08369	2.26642	1.948	1.16346
20	JPN	Japan	日本	2006	D01T02	26.8	8	18.8	1.13501	0.020004	1	.	1	.	.	.	.	.	9.30377	35991.5	350.765	16.8357	-2400000000	4.6e+12	53.3737	4.6e+12	35991.5	1.3e+08	1.2e+12	26.638	66.1353	3.27844	-2400000000	73.3	1.27258	20.6712	0.020004	5333.04	61614	347060	29.6656	1.0825	2.23362	0.9118	0.028869	0.090516	2.23652	1.9705	1.13501
20	JPN	Japan	日本	2007	D01T02	31.6	9.3	22.2	1.11326	0.022243	1	.	1	.	.	.	.	.	9.57078	35779	351.169	14.7718	2.2e+10	4.6e+12	54.3948	4.6e+12	35779	1.3e+08	1.2e+12	29.1843	65.7156	3.3396	2.2e+10	72.7	1.18836	22.1106	0.022243	5325.62	62793	333498	29.5973	1.05336	2.42206	1.2991	0.032394	0.10269	2.25319	2.02396	1.11326
20	JPN	Japan	日本	2008	D01T02	43.6	13.6	30	1.08341	0.018957	1	.	1	.	.	.	.	.	9.04416	39876.3	351.339	15.0943	2.5e+10	5.1e+12	55.4159	5.1e+12	39876.3	1.3e+08	1.3e+12	30.2339	65.2516	3.33718	2.5e+10	73	1.1817	23.5152	0.018957	5108.78	60892	330110	28.783	1.0541	2.41477	2.4028	0.031937	0.118643	2.26442	2.09008	1.08341
20	JPN	Japan	日本	2009	D01T02	41.5	14.2	27.3	1.07067	0.02112	1	.	1	.	.	.	.	.	8.59828	41309	351.295	17.057	1.2e+10	5.3e+12	56.437	5.3e+12	41309	1.3e+08	1.3e+12	21.4141	64.7317	3.2314	1.2e+10	72.8	1.20344	25.6509	0.02112	5099.21	53281	295315	27.1112	1.08232	2.63029	1.81332	0.022909	0.08901	2.19262	2.04789	1.07067
20	JPN	Japan	日本	2010	D01T02	61.3	22.1	39.2	1.07448	0.020044	1	.	1	.	.	.	.	.	9.03006	44968.2	351.358	16.6637	7.4e+09	5.8e+12	57.458	5.8e+12	44968.2	1.3e+08	1.3e+12	25.4179	64.1471	3.13708	7.4e+09	72.9	1.22555	26.6201	0.020044	5103.63	54517	290081	28.336	1.10828	2.57283	1.69503	0.02696	0.092364	2.17926	2.0282	1.07448
20	JPN	Japan	日本	2011	D01T02	41.4	14.6	26.8	1.0528	0.019917	1	.	1	.	.	.	.	.	9.49297	48760.1	350.708	7.522	-850000000	6.2e+12	58.4791	6.2e+12	48760.1	1.3e+08	1.5e+12	26.9296	63.5357	3.24477	-850000000	72.8	1.24859	27.8861	0.019917	5110.17	55030	287580	26.7014	1.08027	2.57453	1.97931	0.026781	0.107857	2.18055	2.07118	1.0528
20	JPN	Japan	日本	2012	D01T02	55.3	20.1	35.3	1.06052	0.017856	1	.	1	.	.	.	.	.	9.82233	49145.3	350.148	2.64981	5.5e+08	6.3e+12	59.5002	6.3e+12	49145.3	1.3e+08	1.5e+12	26.8545	62.8796	3.20908	5.5e+08	71.6	1.26568	28.2607	0.017856	5032.93	55783	287013	26.5626	1.12285	2.74337	1.68214	0.024092	0.10493	2.17917	2.05481	1.06052
20	JPN	Japan	日本	2013	D01T02	80.2	24.8	55.4	1.02342	0.022282	1	.	1	.	.	.	.	.	9.90839	40898.6	349.643	2.43115	1.1e+10	5.2e+12	60.5212	5.2e+12	40898.6	1.3e+08	1.3e+12	29.7039	62.2085	3.31496	1.1e+10	71.8	1.32704	28.9152	0.022282	5147.44	56705	271731	26.6507	1.06672	2.80665	2.33284	0.026941	0.121284	2.17052	2.12086	1.02342
20	JPN	Japan	日本	2014	D01T02	103.8	30.6	73.2	0.9789	0.024396	1	.	1	.	.	.	.	.	9.56283	38475.4	349.18	2.22189	2.0e+10	4.9e+12	61.5423	4.9e+12	38475.4	1.3e+08	1.2e+12	30.6803	61.5688	3.40022	2.0e+10	72.4	1.37602	29.6438	0.024396	5328.41	60030	265959	27.3136	0.996606	2.67378	2.29264	0.027346	0.133113	2.13355	2.17954	0.9789
20	JPN	Japan	日本	2015	D01T02	121.8	35.5	86.4	1.01527	0.029643	1	.	1	.	.	.	.	.	9.27667	34960.6	348.809	3.09202	5.3e+09	4.4e+12	62.5634	4.5e+12	34960.6	1.3e+08	1.1e+12	28.6402	60.9913	3.28165	5.3e+09	73.3	1.35722	30.548	0.029643	5173.03	59882	258839	28.5837	1.03412	2.47487	1.82112	0.028159	0.118098	2.13624	2.10411	1.01527
20	JPN	Japan	日本	2016	D01T02	133.4	40.3	93	1.03119	0.031971	1	.	1	.	.	.	.	.	9.18971	39375.5	348.631	.	4.1e+10	5.0e+12	63.5844	5.0e+12	39400.7	1.3e+08	1.2e+12	25.0372	60.4938	3.15786	4.1e+10	73.1	1.36116	31.3445	0.031971	5209.37	58137	260244	28.6299	1.12498	2.3128	1.45315	0.024882	0.096598	2.08635	2.02325	1.03119
20	JPN	Japan	日本	2017	D01T02	174.7	48.8	126	1.04082	0.034186	1	.	1	.	.	.	.	.	9.09834	38834.1	348.346	.	1.9e+10	4.9e+12	63.807	4.9e+12	38891.1	1.3e+08	1.2e+12	27.7929	60.0761	3.20798	1.9e+10	69.6	1.36655	32.0004	0.034186	5304.14	58189	260292	28.8824	1.12844	2.42369	1.6299	0.027932	0.10243	2.10608	2.02348	1.04082
20	JPN	Japan	日本	2018	D01T02	167.6	49.6	117.9	0.984682	0.031154	1	.	1	.	.	.	.	.	8.8017	39751.1	347.904	.	2.5e+10	5.0e+12	64.1038	5.0e+12	39808.2	1.3e+08	1.3e+12	29.5148	59.7268	3.27512	2.5e+10	72.3	1.34104	32.8668	0.031154	5331.15	59937	253630	28.9797	1.04441	2.51618	1.8101	0.023204	0.111082	2.08611	2.11857	0.984682
21	KOR	Korea	韩国	1995	D01T02	22.2	8.6	13.6	1.26215	0.116499	1	.	1	.	.	.	.	.	8.54692	12564.8	467.479	12.2653	2.5e+09	5.7e+11	48.3263	5.7e+11	12564.8	4.5e+07	2.1e+11	45.9203	70.9929	2.18402	2.5e+09	72	0.587209	.	0.116499	.	19271	59228	36.4913	5.32867	1.0121	1.97662	0.039519	0.068933	1.97929	1.56819	1.26215
21	KOR	Korea	韩国	1996	D01T02	35.6	12	23.6	1.32216	0.106918	1	.	1	.	.	.	.	.	9.00589	13403	471.954	12.4447	2.8e+09	6.1e+11	53.7302	6.1e+11	13403	4.6e+07	2.3e+11	45.8977	71.0386	2.21616	2.8e+09	73	0.556087	.	0.106918	2173.35	21921	68405	35.4481	4.96065	0.903405	2.98076	0.041253	0.073887	2.11075	1.59644	1.32216
21	KOR	Korea	韩国	1997	D01T02	43	15.7	27.3	1.29532	0.10777	1	.	1	.	.	.	.	.	9.3929	12398.5	476.4	11.9452	3.3e+09	5.7e+11	69.2393	5.7e+11	12398.5	4.6e+07	2.0e+11	49.2809	71.3371	2.2483	3.3e+09	69.8	0.524966	.	0.10777	2222.27	25325	67359	35.3965	4.47517	1.35252	3.92876	0.048213	0.074141	2.12396	1.63971	1.29532
21	KOR	Korea	韩国	1998	D01T02	18.4	11.5	6.9	1.33101	0.120605	1	.	1	.	.	.	.	.	7.91953	8281.7	479.852	15.2632	6.0e+09	3.8e+11	66.5222	3.8e+11	8281.7	4.6e+07	1.2e+11	58.8512	71.7491	2.11026	6.0e+09	73.3	0.493845	0.03027	0.120605	1984.98	24637	50596	35.3083	4.22594	1.66622	3.47343	0.071982	0.084952	2.3869	1.7933	1.33101
21	KOR	Korea	韩国	1999	D01T02	15.5	11	4.5	1.33082	0.102912	1	.	1	.	.	.	.	.	8.62092	10672.4	483.275	15.8303	1.1e+10	5.0e+11	72.3455	5.0e+11	10672.4	4.7e+07	1.5e+11	52.9508	72.0648	2.01567	1.1e+10	69.7	0.545973	0.597587	0.102912	2131.36	24672	55970	34.6659	4.24975	1.35658	4.04416	0.046467	0.072834	2.25068	1.6912	1.33082
21	KOR	Korea	韩国	2000	D01T02	15.1	11.4	3.7	1.2916	0.089663	1	.	1	.	.	.	.	.	9.71443	12257	487.333	15.3562	1.2e+10	5.8e+11	76.6555	5.8e+11	12257	4.7e+07	1.8e+11	57.7511	72.1992	2.12519	1.2e+10	69.7	0.5981	8.27125	0.089663	2287.29	29179	72831	34.7553	3.85779	1.23735	5.44241	0.040827	0.090795	2.23726	1.73217	1.2916
21	KOR	Korea	韩国	2001	D01T02	23.9	15.7	8.3	1.27182	0.078736	1	.	1	.	.	.	.	.	9.95421	11561.2	489.665	15.5852	6.5e+09	5.5e+11	79.5694	5.5e+11	11561.2	4.7e+07	1.7e+11	53.2334	72.3767	2.27865	6.5e+09	69.1	0.646142	16.6112	0.078736	2857.85	30898	73714	33.221	3.56582	1.25589	5.32448	0.036892	0.091935	2.22508	1.74953	1.27182
21	KOR	Korea	韩国	2002	D01T02	25.4	17.5	7.9	1.25902	0.069213	1	.	1	.	.	.	.	.	9.71786	13165.1	492.249	15.9055	5.5e+09	6.3e+11	82.1456	6.3e+11	13165.1	4.8e+07	1.9e+11	50.1553	72.3728	2.20774	5.5e+09	69.5	0.694183	21.9893	0.069213	2956.63	29566	76570	32.8127	3.2068	1.33573	4.03257	0.032639	0.097501	2.16984	1.72344	1.25902
21	KOR	Korea	韩国	2003	D01T02	33.8	20.6	13.1	1.2421	0.063176	1	.	1	.	.	.	.	.	9.72387	14672.9	494.755	17.0196	7.0e+09	7.0e+11	84.3598	7.0e+11	14672.9	4.8e+07	2.2e+11	53.029	72.2767	2.27722	7.0e+09	68.3	0.675807	23.514	0.063176	3134.09	28338	90313	33.1113	2.9646	1.45942	3.56106	0.034852	0.102985	2.14098	1.72368	1.2421
21	KOR	Korea	韩国	2004	D01T02	35.7	16.1	19.6	1.2433	0.061183	1	.	1	.	.	.	.	.	10.1057	16496.1	496.618	16.6762	1.3e+10	7.9e+11	87.4889	7.9e+11	16496.1	4.8e+07	2.5e+11	60.303	72.2341	2.44214	1.3e+10	67.8	0.694281	24.9782	0.061183	3221.46	34865	105250	34.7348	2.95802	1.65594	4.14877	0.034777	0.113314	2.16591	1.74207	1.2433
21	KOR	Korea	韩国	2005	D01T02	43.6	17.2	26.4	1.14011	0.079204	1	.	1	.	.	.	.	.	9.98249	19402.5	497.517	18.4928	1.4e+10	9.3e+11	91.6936	9.4e+11	19402.5	4.8e+07	2.9e+11	58.3652	72.3095	2.5229	1.4e+10	66.4	0.776066	25.4559	0.079204	3692.17	38733	122188	34.1503	2.61998	1.69231	5.52335	0.033692	0.128496	2.07302	1.81827	1.14011
21	KOR	Korea	韩国	2006	D01T02	45.1	17.9	27.1	1.11998	0.052721	1	.	1	.	.	.	.	.	10.0716	21743.5	499.982	18.4629	9.2e+09	1.1e+12	97.0522	1.1e+12	21743.5	4.8e+07	3.2e+11	60.277	72.4472	2.71934	9.2e+09	67.5	0.687867	29.2256	0.052721	4091.41	40713	125476	33.5173	2.49747	2.4756	6.428	0.030359	0.134726	2.08494	1.86159	1.11998
21	KOR	Korea	韩国	2007	D01T02	41.7	17.1	24.6	1.06441	0.053764	1	.	1	.	.	.	.	.	10.3463	24086.4	502.307	17.107	8.8e+09	1.2e+12	101.928	1.2e+12	24086.4	4.9e+07	3.5e+11	62.1121	72.6279	2.87258	8.8e+09	67.8	0.839693	30.5056	0.053764	4525.93	43768	128701	33.4538	2.28341	2.47336	6.63054	0.031816	0.149492	2.04937	1.92536	1.06441
21	KOR	Korea	韩国	2008	D01T02	46.3	22.6	23.7	1.0362	0.043273	1	.	1	.	.	.	.	.	10.4969	21350.4	505.771	17.649	1.1e+10	1.0e+12	104.093	1.1e+12	21350.4	4.9e+07	3.3e+11	81.8533	72.8446	2.98887	1.1e+10	68.6	0.702151	31.9739	0.043273	4801.24	43518	127114	32.5102	2.14225	2.21122	9.11241	0.042231	0.196578	2.21317	2.13585	1.0362
21	KOR	Korea	韩国	2009	D01T02	62.4	30.1	32.3	1.11	0.056045	1	.	1	.	.	.	.	.	10.6806	19143.9	508.014	17.1454	9.0e+09	9.4e+11	104.278	9.4e+11	19143.9	4.9e+07	2.9e+11	72.7395	73.0504	3.14669	9.0e+09	68.1	0.763526	33.6473	0.056045	4946.09	36207	127316	32.9054	2.24056	1.90649	6.54303	0.047838	0.18737	2.38005	2.1442	1.11
21	KOR	Korea	韩国	2010	D01T02	75.4	41.3	34.1	1.11158	0.056431	1	.	1	.	.	.	.	.	11.6078	23087.2	509.816	15.8724	9.5e+09	1.1e+12	102.791	1.1e+12	23087.2	5.0e+07	3.5e+11	77.9322	73.2051	3.31578	9.5e+09	69.9	0.779976	35.2247	0.056431	5330.8	38296	131805	34.1168	2.14402	2.06566	6.98564	0.051468	0.179742	2.35048	2.11454	1.11158
21	KOR	Korea	韩国	2011	D01T02	81.9	40.6	41.3	1.18218	0.039086	1	.	1	.	.	.	.	.	11.9848	25096.3	513.804	15.8632	9.8e+09	1.3e+12	100.747	1.3e+12	25096.3	5.0e+07	3.8e+11	86.148	73.2828	3.59199	9.8e+09	69.8	0.822507	36.3221	0.039086	5802.84	40890	138034	34.451	2.2092	2.27201	9.56161	0.061245	0.18525	2.44919	2.07175	1.18218
21	KOR	Korea	韩国	2012	D01T02	92.9	51.8	41.2	1.17732	0.040332	1	.	1	.	.	.	.	.	11.9585	25466.8	515.876	15.2517	9.5e+09	1.3e+12	97.4276	1.3e+12	25466.8	5.0e+07	3.8e+11	83.4975	73.3532	3.8504	9.5e+09	69.9	0.767595	36.7744	0.040332	6304.14	40779	148136	34.1347	2.18619	2.10726	10.4941	0.061153	0.189097	2.46661	2.09511	1.17732
21	KOR	Korea	韩国	2013	D01T02	107.1	61.3	45.8	1.15569	0.047255	1	.	1	.	.	.	.	.	11.89	27182.7	517.612	14.1627	1.3e+10	1.4e+12	95.6086	1.4e+12	27182.7	5.0e+07	4.0e+11	78.4374	73.4044	3.95124	1.3e+10	70.3	0.778249	37.4015	0.047255	6392.64	44611	159978	34.4478	2.09905	1.9792	9.66956	0.058381	0.179334	2.42294	2.09653	1.15569
21	KOR	Korea	韩国	2014	D01T02	133.8	94.3	39.5	1.18322	0.041022	1	.	1	.	.	.	.	.	11.5887	29249.6	520.852	15.614	9.3e+09	1.5e+12	94.8521	1.5e+12	29249.6	5.1e+07	4.3e+11	74.0175	73.4137	4.07786	9.3e+09	71.2	0.767554	37.974	0.041022	6826.27	46219	164073	34.0917	2.05668	2.00934	9.19087	0.05427	0.16993	2.45077	2.07128	1.18322
21	KOR	Korea	韩国	2015	D01T02	118.6	85.6	33	1.28097	0.043045	1	.	1	.	.	.	.	.	11.9147	28732.2	523.526	15.9628	4.1e+09	1.5e+12	94.3398	1.5e+12	28732.2	5.1e+07	4.3e+11	65.7166	73.3589	3.9782	4.1e+09	71.5	0.70397	39.2679	0.043045	7013.49	46419	167275	34.1499	2.00391	2.0234	6.28828	0.06657	0.148205	2.59766	2.02789	1.28097
21	KOR	Korea	韩国	2016	D01T02	125.8	93.3	32.5	1.25724	0.045499	1	.	1	.	.	.	.	.	12.0248	29288.9	525.37	.	1.2e+10	1.5e+12	94.0336	1.5e+12	29288.9	5.1e+07	4.5e+11	60.1035	73.1641	3.98704	1.2e+10	71.7	0.766718	40.0618	0.045499	7086.45	45406	163424	34.2978	1.85903	2.0698	5.54929	0.063576	0.142435	2.54358	2.02316	1.25724
21	KOR	Korea	韩国	2017	D01T02	112.5	74.7	37.8	1.31235	0.040408	1	.	1	.	.	.	.	.	12.2002	31616.8	526.735	.	1.8e+10	1.6e+12	94.3497	1.6e+12	31616.8	5.1e+07	5.1e+11	64.7928	72.9223	4.29206	1.8e+10	74.3	0.813878	41.1478	0.040408	7497.6	45691	159084	34.7663	1.85076	2.0491	6.34576	0.065366	0.139453	2.58725	1.97147	1.31235
21	KOR	Korea	韩国	2018	D01T02	146.7	101.7	45	1.29538	0.056772	1	.	1	.	.	.	.	.	12.2252	33436.9	528.969	.	1.2e+10	1.7e+12	95.8642	1.7e+12	33422.9	5.2e+07	5.2e+11	66.0965	72.6081	4.52753	1.2e+10	73.8	0.909884	41.1903	0.056772	7980.4	47431	162561	34.0458	1.7464	2.16841	7.93461	0.071894	0.152722	2.64139	2.03909	1.29538
22	LVA	Latvia	拉脱维亚	1995	D01T02	0	0	0	0.860874	0.936788	0	.	1	.	.	.	.	.	3.62037	2329.58	39.9353	6.16651	2.4e+08	5.8e+09	22.7661	5.8e+09	2328.23	2.5e+06	8.2e+08	53.9772	65.5395	0.42951	2.4e+08	47.6	0.450808	.	0.936788	.	90	210	26.7712	7.8417	0.937322	1.74778	0.090032	0.170306	1.822	2.11645	0.860874
22	LVA	Latvia	拉脱维亚	1996	D01T02	0.1	0.1	0.1	0.840805	0.757322	0	.	1	.	.	.	.	.	3.6665	2431.71	39.488	4.68132	3.3e+08	6.0e+09	26.8609	6.0e+09	2429.21	2.5e+06	1.1e+09	63.0412	65.765	0.39844	3.3e+08	55	0.433927	.	0.757322	1145.3	273	196	26.5681	6.76051	0.940917	2.01829	0.08664	0.192616	1.76311	2.09693	0.840805
22	LVA	Latvia	拉脱维亚	1997	D01T02	0.2	0.1	0.1	0.813678	1.04371	0	.	1	.	.	.	.	.	3.5056	2683.24	39.0964	5.33425	4.7e+08	6.5e+09	33.2554	6.5e+09	2680.64	2.4e+06	1.2e+09	67.3607	66.0493	0.36737	4.7e+08	62.4	0.417046	.	1.04371	1063.87	40	162	27.9454	4.96719	2.14569	1.04822	0.119561	0.228093	1.86876	2.29669	0.813678
22	LVA	Latvia	拉脱维亚	1998	D01T02	0	0	0	0.834046	1.26293	0	.	1	.	.	.	.	.	3.37445	2973.53	38.7295	6.66656	3.7e+08	7.2e+09	42.7538	7.2e+09	2970.59	2.4e+06	1.7e+09	69.8684	66.3846	0.38031	3.7e+08	63.4	0.400164	.	1.26293	1052.03	90	195	25.775	3.82055	2.62113	1.71253	0.161845	0.257689	2.00238	2.4008	0.834046
22	LVA	Latvia	拉脱维亚	1999	D01T02	0	0	0	0.889121	1.35265	0	.	1	.	.	.	.	.	3.1579	3151.58	38.4155	6.47476	3.5e+08	7.5e+09	50.7322	7.5e+09	3148.07	2.4e+06	1.7e+09	62.1495	66.7589	0.35257	3.5e+08	64.2	0.396869	.	1.35265	1090.49	91	91	24.7272	3.65791	4.15961	2.94565	0.173907	0.22154	2.01804	2.2697	0.889121
22	LVA	Latvia	拉脱维亚	2000	D01T02	0	0	0	1.01135	1.32385	0	.	1	.	.	.	.	.	2.92689	3361.64	38.047	6.85827	3.2e+08	7.9e+09	56.2438	8.0e+09	3357.59	2.4e+06	2.0e+09	63.7796	67.155	0.43618	3.2e+08	63.4	0.393574	0.01187	1.32385	1599.72	81	98	23.62	4.46532	6.03291	2.4689	0.1859	0.187741	2.22739	2.20239	1.01135
22	LVA	Latvia	拉脱维亚	2001	D01T02	0	0	0	0.982629	1.43426	0	.	1	.	.	.	.	.	3.14791	3578	37.5588	6.35206	1.7e+08	8.4e+09	63.4918	8.4e+09	3573.3	2.3e+06	2.3e+09	65.9409	67.4446	0.40396	1.7e+08	66.4	0.495326	0.13712	1.43426	1482.6	63	117	22.7745	4.41346	5.31285	1.37854	0.191567	0.20705	2.20266	2.2416	0.982629
22	LVA	Latvia	拉脱维亚	2002	D01T02	0.1	0	0	1.03167	1.44401	0	.	1	.	.	.	.	.	3.18253	4136.93	37.1249	6.43059	1.6e+08	9.5e+09	67.8093	9.6e+09	4131.8	2.3e+06	2.3e+09	66.3267	67.6944	0.40959	1.6e+08	65	0.597079	0.429896	1.44401	1479.51	64	150	22.6053	4.49884	5.60556	1.4736	0.18635	0.189543	2.20007	2.13253	1.03167
22	LVA	Latvia	拉脱维亚	2003	D01T02	0.1	0.1	0.1	1.02904	1.3143	0	.	1	.	.	.	.	.	3.31877	5145.2	36.7679	6.11262	3.2e+08	1.2e+10	71.0342	1.2e+10	5135.35	2.3e+06	2.9e+09	69.1692	67.9382	0.36053	3.2e+08	66	0.70806	0.851355	1.3143	1389.08	24	91	21.3174	3.93534	3.95102	1.37721	0.179709	0.207352	2.27964	2.2153	1.02904
22	LVA	Latvia	拉脱维亚	2004	D01T02	0.1	0	0	1.04892	1.57953	0	.	1	.	.	.	.	.	3.36548	6378.67	36.3688	7.20449	5.9e+08	1.4e+10	74.6086	1.4e+10	6363.72	2.3e+06	4.1e+09	77.108	68.1971	0.40063	5.9e+08	67.4	0.612353	2.17134	1.57953	1458.58	43	108	21.4337	4.19691	3.2404	4.61662	0.204066	0.212094	2.31619	2.20817	1.04892
22	LVA	Latvia	拉脱维亚	2005	D01T02	0	0	0	1.06721	2.0662	0	.	1	.	.	.	.	.	3.44604	7594.9	35.9779	7.61913	8.1e+08	1.7e+10	75.4192	1.7e+10	7575.18	2.2e+06	5.3e+09	81.7132	68.4623	0.53	8.1e+08	66.3	0.681404	2.72126	2.0662	1457.38	57	112	20.2098	3.72327	3.52246	8.89394	0.240779	0.217302	2.38041	2.2305	1.06721
22	LVA	Latvia	拉脱维亚	2006	D01T02	1	0.3	0.7	1.0439	2.23739	0	.	1	.	.	.	.	.	3.69638	9723.45	35.6494	6.45628	1.7e+09	2.2e+10	74.5965	2.2e+10	9699.72	2.2e+06	7.3e+09	82.2402	68.3332	0.65094	1.7e+09	66.9	0.734915	4.97633	2.23739	1768.49	37	114	20.7526	3.25597	3.97174	5.17629	0.248965	0.228131	2.41378	2.31227	1.0439
22	LVA	Latvia	拉脱维亚	2007	D01T02	0.3	0.1	0.2	1.01276	2.34574	0	.	1	.	.	.	.	.	3.87752	14113.5	35.3597	7.06002	2.7e+09	3.1e+10	73.0433	3.1e+10	14091	2.2e+06	1.1e+10	76.2138	68.2462	0.55385	2.7e+09	67.9	0.665123	15.5584	2.34574	1891.19	8	139	21.5814	3.28393	3.50414	3.65842	0.241462	0.221106	2.31094	2.28183	1.01276
22	LVA	Latvia	拉脱维亚	2008	D01T02	0.4	0.1	0.3	1.07994	2.53582	0	.	1	.	.	.	.	.	3.72288	16467.1	34.99	7.60846	1.4e+09	3.6e+10	72.3635	3.6e+10	16422.1	2.2e+06	1.1e+10	73.5173	68.1494	0.58038	1.4e+09	68.3	0.605441	19.1641	2.53582	2012.66	9	206	21.7708	2.95482	4.18138	3.43291	0.288183	0.210584	2.51886	2.3324	1.07994
22	LVA	Latvia	拉脱维亚	2009	D01T02	0.7	0.3	0.4	1.04579	2.42508	0	.	1	.	.	.	.	.	3.43849	12331.9	34.417	7.66464	-150000000	2.6e+10	73.0549	2.6e+10	12288.2	2.1e+06	5.9e+09	66.5456	67.9836	0.45131	-150000000	66.6	0.641404	21.3856	2.42508	1688.28	3	240	20.9496	3.20982	2.78956	5.05888	0.28292	0.212514	2.49175	2.38265	1.04579
22	LVA	Latvia	拉脱维亚	2010	D01T02	0.2	0.1	0.1	1.12546	3.29447	0	.	1	.	.	.	.	.	4.06097	11421	33.7081	6.5742	4.7e+08	2.4e+10	69.051	2.4e+10	11379.8	2.1e+06	4.6e+09	88.9117	67.7321	0.60979	4.8e+08	66.2	0.671782	20.6933	3.29447	1838.72	7	178	20.4458	4.05728	3.73215	5.30563	0.357477	0.202238	2.64963	2.35427	1.12546
22	LVA	Latvia	拉脱维亚	2011	D01T02	3.3	0.9	2.4	1.01614	2.72773	0	.	1	.	.	.	.	.	3.83418	13339	33.0999	6.45138	1.5e+09	2.8e+10	67.9535	2.8e+10	13776.1	2.1e+06	6.2e+09	103.684	67.3285	0.69606	1.5e+09	65.8	0.624732	22.0235	2.72773	1885.26	10	173	20.7233	3.68792	4.55522	8.25567	0.355596	0.240529	2.56189	2.52121	1.01614
22	LVA	Latvia	拉脱维亚	2012	D01T02	6.4	1.3	5.2	0.979898	3.34416	0	.	1	.	.	.	.	.	3.72149	13847.3	32.6919	9.10698	1.1e+09	2.8e+10	66.6435	2.8e+10	13923.5	2.0e+06	7.1e+09	110.642	66.8908	0.66305	1.1e+09	65.2	0.685854	23.1853	3.34416	1886.89	12	193	20.6214	3.45474	3.57383	7.83978	0.391836	0.269701	2.53153	2.58346	0.979898
22	LVA	Latvia	拉脱维亚	2013	D01T02	16.2	2.7	13.5	0.969007	2.61327	0	.	1	.	.	.	.	.	3.70279	15007.5	32.3436	7.41799	9.9e+08	3.0e+10	69.0766	3.0e+10	15122.7	2.0e+06	7.0e+09	106.227	66.4204	0.61176	9.9e+08	66.5	0.732203	24.4156	2.61327	1772.65	8	225	20.1008	3.17366	3.17966	7.69649	0.342345	0.264129	2.53783	2.619	0.969007
22	LVA	Latvia	拉脱维亚	2014	D01T02	29	4.5	24.6	0.99883	2.67988	0	.	1	.	.	.	.	.	3.65251	15742.4	32.0405	6.84385	1.0e+09	3.1e+10	70.8979	3.1e+10	15713.5	2.0e+06	7.2e+09	104.308	65.9201	0.68825	1.1e+09	68.7	0.792443	25.1114	2.67988	1854.33	4	103	18.9385	3.54078	2.83229	8.65082	0.342041	0.253565	2.51465	2.5176	0.99883
22	LVA	Latvia	拉脱维亚	2015	D01T02	23.9	3.5	20.4	1.02965	2.7985	0	.	1	.	.	.	.	.	3.69952	13786.5	31.7792	.	8.1e+08	2.7e+10	74.2999	2.7e+10	13774.6	2.0e+06	6.0e+09	99.1386	65.3871	0.62352	8.1e+08	69.7	0.788549	25.2768	2.7985	1808.6	1	136	19.1036	3.49468	2.2108	7.4569	0.334254	0.239621	2.48162	2.41015	1.02965
22	LVA	Latvia	拉脱维亚	2016	D01T02	23.7	3.1	20.6	1.04363	2.66057	0	.	1	.	.	.	.	.	3.64642	14331.8	31.4901	.	3.4e+08	2.8e+10	80.6048	2.8e+10	14315.8	2.0e+06	5.4e+09	95.2791	65.0915	0.44032	3.4e+08	70.4	0.799531	26.3066	2.66057	1596.54	18	95	18.5196	3.25954	1.7324	5.68606	0.366179	0.241959	2.54332	2.43699	1.04363
22	LVA	Latvia	拉脱维亚	2017	D01T02	31.7	3.4	28.3	1.04935	2.60164	0	.	1	.	.	.	.	.	3.66416	15695.1	31.2123	.	1.2e+09	3.0e+10	88.0574	3.0e+10	15643.5	1.9e+06	6.3e+09	102.552	64.5904	0.51459	1.2e+09	74.8	0.797347	26.9186	2.60164	1784.64	7	90	19.0466	3.55239	2.05629	5.2392	0.348839	0.223499	2.43352	2.31908	1.04935
22	LVA	Latvia	拉脱维亚	2018	D01T02	21.6	2.8	18.8	1.1155	2.78713	0	.	1	.	.	.	.	.	4.0397	17865	30.9701	.	4.2e+08	3.4e+10	93.0245	3.4e+10	17849.6	1.9e+06	7.6e+09	104.209	63.9606	0.64083	4.3e+08	73.6	0.792296	27.1744	2.78713	1792.1	24	86	18.6596	3.59381	2.18133	5.24096	0.374421	0.211452	2.58288	2.31544	1.1155
23	LTU	Lithuania	立陶宛	1995	D01T02	0.1	0	0	1.13048	2.71232	0	.	1	.	.	.	.	.	3.78667	2167.79	57.8989	36.2409	7.3e+07	7.9e+09	26.2974	7.9e+09	2167.79	3.6e+06	1.6e+09	80.779	65.9513	0.44652	7.3e+07	42.1	0.705254	.	2.71232	.	27	106	28.1674	9.87952	4.98419	11.3884	0.126246	0.143565	2.51741	2.22684	1.13048
23	LTU	Lithuania	立陶宛	1996	D01T02	0	0	0	1.16258	2.79484	0	.	1	.	.	.	.	.	3.95162	2327.43	57.4603	39.4632	1.5e+08	8.4e+09	28.4891	8.4e+09	2327.43	3.6e+06	1.7e+09	94.4227	65.8563	0.49155	1.5e+08	49.7	0.662522	.	2.79484	2090.04	78	100	27.1062	10.9424	2.48981	14.8716	0.124945	0.128622	2.42743	2.08797	1.16258
23	LTU	Lithuania	立陶宛	1997	D01T02	0.1	0	0.1	1.15876	2.59507	0	.	1	.	.	.	.	.	3.89456	2830.28	57.0379	36.0313	3.6e+08	1.0e+10	32.4776	1.0e+10	2830.28	3.6e+06	2.3e+09	93.9356	65.8116	0.53658	3.6e+08	57.3	0.619789	.	2.59507	2178.83	77	125	26.957	9.4219	2.04842	17.2322	0.137441	0.136446	2.26503	1.95471	1.15876
23	LTU	Lithuania	立陶宛	1998	D01T02	0.1	0	0	1.12089	2.41685	0	.	1	.	.	.	.	.	4.14343	3166.67	56.6262	38.5907	9.2e+08	1.1e+10	38.674	1.1e+10	3166.67	3.5e+06	2.7e+09	84.5675	65.8276	0.54377	9.2e+08	59.4	0.577056	.	2.41685	2372.9	71	134	27.2603	7.66213	1.75365	18.6301	0.128623	0.144555	2.22561	1.98558	1.12089
23	LTU	Lithuania	立陶宛	1999	D01T02	0.1	0.1	0	1.06515	2.2383	0	.	1	.	.	.	.	.	3.47471	3113.18	56.2259	33.2055	5.6e+08	1.1e+10	44.6277	1.1e+10	3113.18	3.5e+06	2.4e+09	71.4482	65.9082	0.502	5.7e+08	61.5	0.525063	.	2.2383	2419.54	71	86	26.2783	6.38289	1.5625	14.417	0.106031	0.141199	2.12059	1.99089	1.06515
23	LTU	Lithuania	立陶宛	2000	D01T02	7.1	3.6	3.5	1.14353	2.17582	0	.	1	.	.	.	.	.	3.00446	3293.23	55.8318	31.7217	3.8e+08	1.2e+10	50.8968	1.2e+10	3293.23	3.5e+06	2.2e+09	80.4094	66.0519	0.5848	3.8e+08	61.9	0.473071	.	2.17582	2220.83	61	66	26.3356	5.58605	2.07667	20.8549	0.138089	0.14045	2.18241	1.90849	1.14353
23	LTU	Lithuania	立陶宛	2001	D01T02	0.5	0.3	0.2	1.03647	2.44884	0	.	1	.	.	.	.	.	3.21354	3525.79	55.3736	36.5641	4.4e+08	1.2e+10	57.3476	1.2e+10	3525.79	3.5e+06	2.5e+09	89.3655	66.308	0.66679	4.4e+08	65.5	0.57643	0.068171	2.44884	2324.66	55	68	27.0757	4.8743	1.80173	23.144	0.166876	0.176139	2.08392	2.01059	1.03647
23	LTU	Lithuania	立陶宛	2002	D01T02	2.9	1.6	1.3	1.11094	2.30365	0	.	1	.	.	.	.	.	3.25922	4141.59	54.9309	42.3873	6.6e+08	1.4e+10	63.0701	1.4e+10	4141.59	3.4e+06	3.0e+09	92.4558	66.5513	0.6567	6.6e+08	66.1	0.679789	0.568861	2.30365	1836.41	46	85	26.2826	4.77513	1.84617	18.6178	0.171903	0.158543	2.20905	1.98845	1.11094
23	LTU	Lithuania	立陶宛	2003	D01T02	1.3	0.7	0.6	1.07681	1.97089	0	.	1	.	.	.	.	.	3.2884	5499.43	54.4865	44.3159	2.2e+08	1.9e+10	69.6304	1.9e+10	5499.43	3.4e+06	4.1e+09	90.3272	66.7876	0.66339	2.2e+08	69.7	0.782237	1.92496	1.97089	1934.77	49	64	27.8577	4.42285	1.57873	19.4333	0.162333	0.162707	2.05296	1.90653	1.07681
23	LTU	Lithuania	立陶宛	2004	D01T02	0.3	0.2	0.1	0.994669	1.20422	0	.	1	.	.	.	.	.	3.52799	6700.33	53.878	42.6187	8.8e+08	2.3e+10	74.9014	2.3e+10	6700.33	3.4e+06	5.2e+09	95.8524	67.0189	0.75066	8.8e+08	72.4	0.753496	3.77056	1.20422	2175.6	44	70	29.5853	4.1729	1.89642	25.0657	0.122813	0.162838	1.9946	2.00529	0.994669
23	LTU	Lithuania	立陶宛	2005	D01T02	0.8	0.3	0.5	0.9712	1.62236	0	.	1	.	.	.	.	.	3.8607	7854.77	53.0078	31.241	1.3e+09	2.6e+10	79.7298	2.6e+10	7854.77	3.3e+06	6.1e+09	104.818	67.2411	0.74741	1.3e+09	70.5	0.736519	6.93875	1.62236	2283.61	47	68	29.64	4.32852	1.49856	26.6307	0.147832	0.169166	1.99923	2.05852	0.9712
23	LTU	Lithuania	立陶宛	2006	D01T02	0.3	0.1	0.2	0.930916	1.82977	0	.	1	.	.	.	.	.	3.98094	9230.71	52.1683	26.7149	2.3e+09	3.0e+10	82.4532	3.0e+10	9230.71	3.3e+06	7.8e+09	111.037	67.3831	0.79119	2.3e+09	71.8	0.718317	11.0961	1.82977	2415.74	34	65	30.0299	3.86424	1.70876	23.5041	0.162206	0.197519	1.9746	2.12113	0.930916
23	LTU	Lithuania	立陶宛	2007	D01T02	0.1	0.1	0	0.911176	2.56587	0	.	1	.	.	.	.	.	4.08756	12285.4	51.5522	27.9201	2.6e+09	4.0e+10	82.5158	4.0e+10	12285.4	3.2e+06	1.1e+10	104.681	67.5447	0.80093	2.6e+09	71.5	0.72443	17.0833	2.56587	2598.05	20	62	29.6173	3.47541	2.04846	13.3266	0.193966	0.21422	2.00624	2.20181	0.911176
23	LTU	Lithuania	立陶宛	2008	D01T02	0.5	0.2	0.4	0.922132	2.66633	0	.	1	.	.	.	.	.	4.08491	14945	51.0288	27.9149	1.7e+09	4.8e+10	85.7451	4.8e+10	14945	3.2e+06	1.3e+10	114.535	67.7142	0.78844	1.7e+09	70.9	0.699838	18.3013	2.66633	2624.76	18	87	29.2215	3.2839	1.73357	24.8328	0.240813	0.261416	2.10034	2.2777	0.922132
23	LTU	Lithuania	立陶宛	2009	D01T02	0.4	0.1	0.3	0.921662	2.43641	0	.	1	.	.	.	.	.	3.69637	11820.8	50.4654	33.1853	-360000000	3.7e+10	89.2522	3.7e+10	11820.8	3.2e+06	6.7e+09	92.9654	67.8618	0.82967	-360000000	70	0.690043	19.9272	2.43641	2680.55	16	91	25.0919	2.53647	1.0719	21.3157	0.245293	0.248998	2.20665	2.39421	0.921662
23	LTU	Lithuania	立陶宛	2010	D01T02	0.3	0.1	0.2	0.818273	2.31388	0	.	1	.	.	.	.	.	4.06928	11987.5	49.4181	1.71259	1.1e+09	3.7e+10	86.5726	3.7e+10	11987.5	3.1e+06	6.3e+09	118.913	67.9633	0.7855	1.1e+09	70.3	0.749232	21.6412	2.31388	2752.72	6	108	26.1981	3.02379	1.43948	23.3503	0.229259	0.27354	1.86555	2.27986	0.818273
23	LTU	Lithuania	立陶宛	2011	D01T02	18.3	3.9	14.4	0.861021	2.16649	0	.	1	.	.	.	.	.	3.91171	14376.9	48.3153	2.42341	1.9e+09	4.4e+10	84.0556	4.4e+10	14376.9	3.0e+06	8.0e+09	137.413	67.7907	0.9051	1.9e+09	71.3	0.711487	23.4757	2.16649	2721.02	15	93	28.0787	3.49019	1.77619	25.2868	0.244041	0.269246	1.95178	2.26682	0.861021
23	LTU	Lithuania	立陶宛	2012	D01T02	11.9	2.5	9.4	0.884802	2.75609	0	.	1	.	.	.	.	.	3.99177	14367.7	47.6717	2.3869	6.8e+08	4.3e+10	79.7516	4.3e+10	14367.7	3.0e+06	7.4e+09	143.442	67.5808	0.89515	6.8e+08	71.5	0.81958	25.0988	2.75609	2634.33	15	109	28.016	3.97946	1.50992	24.502	0.274055	0.260438	1.91479	2.16409	0.884802
23	LTU	Lithuania	立陶宛	2013	D01T02	22.3	3.6	18.7	1.06235	2.7688	0	.	1	.	.	.	.	.	3.83056	15729.7	47.1909	3.36828	7.7e+08	4.7e+10	73.5332	4.7e+10	15729.7	3.0e+06	8.6e+09	144.882	67.335	0.9502	7.7e+08	72.1	0.858753	27.6139	2.7688	2843.86	20	117	27.3949	3.54492	1.34489	23.0353	0.369389	0.268476	2.42457	2.28227	1.06235
23	LTU	Lithuania	立陶宛	2014	D01T02	13.9	2.2	11.7	0.865609	2.4765	0	.	1	.	.	.	.	.	3.70472	16551	46.8055	3.80511	3.6e+08	4.9e+10	70.4006	4.9e+10	16551	2.9e+06	9.2e+09	137.385	67.0528	1.03114	3.6e+08	73	0.896357	26.774	2.4765	3054.02	42	123	27.5077	3.42319	1.35881	17.5492	0.257607	0.269521	1.94042	2.24169	0.865609
23	LTU	Lithuania	立陶宛	2015	D01T02	4.5	0.8	3.7	0.860102	2.17128	0	.	1	.	.	.	.	.	3.81031	14264	46.3673	.	1.0e+09	4.1e+10	69.7405	4.1e+10	14258.2	2.9e+06	8.1e+09	129.279	66.7197	1.04408	1.0e+09	74.7	0.970229	28.1162	2.17128	2785.58	18	101	26.7181	3.42068	1.29746	16.3054	0.239121	0.267634	1.92574	2.23897	0.860102
23	LTU	Lithuania	立陶宛	2016	D01T02	4.3	0.7	3.5	0.821141	1.84691	0	.	1	.	.	.	.	.	3.90568	15008.3	45.7877	.	1.2e+09	4.3e+10	71.1185	4.3e+10	14998.1	2.9e+06	8.5e+09	121.777	66.3897	0.84233	1.2e+09	75.2	0.962955	29.2385	1.84691	2950.28	58	95	25.9447	3.10876	1.2649	13.7742	0.212604	0.277046	1.84994	2.25289	0.821141
23	LTU	Lithuania	立陶宛	2017	D01T02	8.4	1.1	7.3	0.866078	1.76603	0	.	1	.	.	.	.	.	3.96761	16885.4	45.1526	.	1.4e+09	4.8e+10	72.4175	4.8e+10	16843.7	2.8e+06	9.6e+09	130.474	65.9716	0.89641	1.4e+09	75.8	0.904817	27.5016	1.76603	3071.96	46	81	25.8963	3.50751	1.74087	14.7828	0.224484	0.260151	1.88163	2.17259	0.866078
23	LTU	Lithuania	立陶宛	2018	D01T02	6.7	1	5.7	0.889906	1.71614	0	.	1	.	.	.	.	.	4.15932	19186.4	44.7316	.	1.3e+09	5.4e+10	73.7303	5.4e+10	19166.8	2.8e+06	1.1e+10	130.062	65.4125	0.94181	1.3e+09	75.3	0.886182	27.4238	1.71614	3190.7	24	81	25.6191	2.8796	1.89637	14.6036	0.254203	0.273097	1.9572	2.19933	0.889906
24	LUX	Luxembourg	卢森堡	1995	D01T02	0.3	0.2	0	1.16217	0.238969	1	.	1	.	.	.	.	.	21.1928	51032.3	.	2.99816	.	2.2e+10	7.3809	2.2e+10	52831.3	408625	4.7e+09	66.943	67.6562	1.4947	3.9e+09	72.2	1.72341	.	0.238969	.	69	35	19.6534	0.934627	.	.	0.28418	0.293059	2.13341	1.83571	1.16217
24	LUX	Luxembourg	卢森堡	1996	D01T02	0.1	0.1	0	1.10948	0.210452	1	.	1	.	.	.	.	.	21.0919	50444.4	.	2.25199	.	2.2e+10	8.09228	2.2e+10	52571.9	414225	4.3e+09	72.0424	67.3842	1.5111	4.0e+09	72.5	1.71814	.	0.210452	.	77	52	18.5985	0.814883	.	.	0.27655	0.309441	2.09029	1.88402	1.10948
24	LUX	Luxembourg	卢森堡	1997	D01T02	0.3	0.2	0	1.11247	0.210625	1	.	1	.	.	.	.	.	19.65	46641.6	.	3.54987	.	2.0e+10	8.51562	2.0e+10	47042.3	419450	4.1e+09	77.1418	67.2061	1.52751	4.0e+09	72.8	1.71286	.	0.210625	.	102	48	18.4569	0.711508	.	.	0.301649	0.327843	2.0904	1.87906	1.11247
24	LUX	Luxembourg	卢森堡	1998	D01T02	0.3	0.2	0	1.15595	0.215467	1	.	1	.	.	.	.	.	17.8138	47445.4	.	5.92705	.	2.0e+10	8.99352	2.0e+10	47584.5	424700	4.5e+09	82.2412	67.0946	1.54392	4.1e+09	72.7	1.70759	.	0.215467	.	68	44	18.816	0.777303	.	.	0.3141	0.307935	2.12021	1.83417	1.15595
24	LUX	Luxembourg	卢森堡	1999	D01T02	0.7	0.4	0.3	1.09862	0.194917	1	.	1	.	.	.	.	.	18.399	50872.4	.	5.12401	.	2.2e+10	10.0572	2.2e+10	51654.4	430475	5.1e+09	87.3406	67.0228	1.56032	4.1e+09	72.4	1.7623	.	0.194917	.	86	24	17.2533	0.713557	4.52972	0.065795	0.285758	0.28574	2.0145	1.83367	1.09862
24	LUX	Luxembourg	卢森堡	2000	D01T02	0.4	0.3	0	0.862491	0.201729	1	.	1	.	.	.	.	.	19.612	48659.6	169.472	6.09517	.	2.1e+10	9.81474	2.1e+10	48736	436300	4.3e+09	92.44	66.9823	1.57673	4.2e+09	76.4	1.817	.	0.201729	3773.42	91	85	16.6547	0.596867	5.01023	0.094714	0.260392	0.33527	1.65876	1.92322	0.862491
24	LUX	Luxembourg	卢森堡	2001	D01T02	1	0.4	0.6	0.803352	0.186548	1	.	1	.	.	.	.	.	20.6523	48440.1	171.502	2.79101	.	2.1e+10	10.2158	2.1e+10	48179.4	441525	4.6e+09	103.843	66.8942	1.59314	4.2e+09	80.1	1.82271	0.275354	0.186548	.	70	51	16.3139	0.560287	4.68513	0.17415	0.236968	0.351339	1.57625	1.96209	0.803352
24	LUX	Luxembourg	卢森堡	2002	D01T02	0.6	0.3	0.3	0.863459	0.197305	1	.	1	.	.	.	.	.	22.0055	53005.7	173.308	0.772878	4.2e+09	2.4e+10	11.8515	2.4e+10	52930.6	446175	5.0e+09	96.8186	66.844	1.60954	4.2e+09	79.4	1.82843	1.30676	0.197305	.	42	41	16.1081	0.690662	4.63525	0.564342	0.223393	0.358625	1.68282	1.94892	0.863459
24	LUX	Luxembourg	卢森堡	2003	D01T02	0.3	0.3	0.1	0.702952	0.217386	1	.	1	.	.	.	.	.	22.677	65689.3	175.427	0.738546	4.3e+09	3.0e+10	12.1866	3.0e+10	65445.9	451630	6.0e+09	99.6775	66.838	1.62595	4.3e+09	79.9	1.71263	3.40111	0.217386	4357.04	8	16	16.2314	0.464238	4.48418	0.479403	0.232911	0.419488	1.4844	2.11166	0.702952
24	LUX	Luxembourg	卢森堡	2004	D01T02	0.4	0.3	0.1	0.876859	0.241728	1	.	1	.	.	.	.	.	25.4528	76544.9	177.938	0.781666	5.2e+09	3.5e+10	11.5681	3.5e+10	75716.4	458095	7.1e+09	104.644	66.8788	1.60262	5.2e+09	78.9	1.7313	7.97312	0.241728	4494.72	18	23	15.4393	0.535432	4.96726	0.569405	0.305818	0.391198	1.79603	2.04825	0.876859
24	LUX	Luxembourg	卢森堡	2005	D01T02	0.2	0.2	0	0.836542	0.256192	1	.	1	.	.	.	.	.	25.6104	80988.1	180.682	0.810512	4.6e+09	3.7e+10	10.9497	3.7e+10	80289.7	465158	7.1e+09	111.727	66.9567	1.57171	4.7e+09	76.3	1.63639	15.0798	0.256192	4864.12	64	24	14.4661	0.356501	5.73763	0.484746	0.383011	0.469773	1.91038	2.28367	0.836542
24	LUX	Luxembourg	卢森堡	2006	D01T02	0.1	0.1	0	0.797689	0.246147	1	.	1	.	.	.	.	.	24.7911	90788.8	183.587	0.97534	3.2e+10	4.2e+10	10.3312	4.2e+10	89739.7	472637	7.5e+09	118.179	67.2548	1.66674	3.2e+10	75.3	1.6295	20.9418	0.246147	4411.85	26	26	13.5206	0.311757	6.9849	0.755468	0.39744	0.459841	1.79241	2.24701	0.797689
24	LUX	Luxembourg	卢森堡	2007	D01T02	0.6	0.2	0.4	0.871302	0.227344	1	.	1	.	.	.	.	.	23.1553	107475	186.444	1.19957	-30000000000	5.1e+10	10.4693	5.1e+10	106018	479993	9.4e+09	100.145	67.5715	1.59123	-30000000000	74.6	1.68105	26.8157	0.227344	4633.67	25	15	14.476	0.363223	6.76715	0.772267	0.41115	0.428351	1.94218	2.22906	0.871302
24	LUX	Luxembourg	卢森堡	2008	D01T02	1.4	0.4	1	0.806616	0.234974	1	.	1	.	.	.	.	.	22.557	120422	189.807	1.47959	7.1e+09	5.6e+10	10.6073	5.6e+10	114294	488650	1.1e+10	103.583	67.8773	1.62293	7.1e+09	74.7	1.68577	29.3061	0.234974	4712.77	23	48	12.8051	0.307779	6.14523	0.86678	0.447653	0.501889	1.93376	2.39737	0.806616
24	LUX	Luxembourg	卢森堡	2009	D01T02	0.5	0.3	0.2	0.751483	0.237626	1	.	1	.	.	.	.	.	20.9786	109420	193.354	1.26421	2.7e+10	5.1e+10	14.4363	5.1e+10	103199	497783	9.5e+09	90.8478	68.1447	1.6775	2.7e+10	75.2	1.69994	31.3577	0.237626	4826.32	24	60	11.0066	0.233335	4.87701	1.24435	0.426971	0.517683	1.84383	2.4536	0.751483
24	LUX	Luxembourg	卢森堡	2010	D01T02	0.3	0.2	0.1	0.836289	0.255294	1	.	1	.	.	.	.	.	21.7671	110886	196.916	1.22791	3.9e+10	5.3e+10	18.2652	5.3e+10	104965	506953	9.4e+09	84.266	68.363	1.50257	3.9e+10	75.4	1.72201	33.2041	0.255294	5144.98	21	79	10.998	0.268412	5.54609	0.950254	0.551941	0.526496	2.02822	2.42526	0.836289
24	LUX	Luxembourg	卢森堡	2011	D01T02	0.3	0.2	0.2	0.872768	0.246	1	.	1	.	.	.	.	.	21.0357	119025	201.342	1.33442	8.8e+09	6.0e+10	18.8487	6.0e+10	115762	518347	1.2e+10	82.8703	68.643	1.46277	8.8e+09	76.2	1.75483	32.7578	0.246	5451.36	43	85	10.7084	0.251115	5.41455	0.823809	0.594547	0.494065	2.14507	2.45778	0.872768
24	LUX	Luxembourg	卢森堡	2012	D01T02	1.5	0.5	0.9	0.900813	0.280961	1	.	1	.	.	.	.	.	20.138	112585	206.236	1.5555	2.8e+09	5.7e+10	19.4322	5.7e+10	106749	530946	1.1e+10	81.8237	68.9069	1.27267	2.6e+10	74.5	1.72382	31.9836	0.280961	4352.17	52	109	10.4267	0.287952	5.29169	0.906016	0.574446	0.475135	2.12257	2.35628	0.900813
24	LUX	Luxembourg	卢森堡	2013	D01T02	1.3	0.6	0.7	0.836525	0.261337	1	.	1	.	.	.	.	.	18.6856	120000	211.058	2.50731	2.3e+10	6.2e+10	19.5469	6.2e+10	113625	543360	1.2e+10	73.1025	69.1584	1.30266	1.6e+10	74.2	1.71941	32.5007	0.261337	4614.22	56	113	10.4429	0.261907	4.94104	0.912457	0.564631	0.532291	2.12356	2.53855	0.836525
24	LUX	Luxembourg	卢森堡	2014	D01T02	4.2	1.8	2.4	0.819172	0.197116	1	.	1	.	.	.	.	.	17.3426	123679	216.092	2.49909	2.0e+10	6.6e+10	19.6616	6.6e+10	118824	556319	1.3e+10	69.2168	69.402	1.26404	1.9e+10	74.2	1.69967	33.593	0.197116	4741.07	90	128	10.8109	0.28955	4.72257	0.792755	0.49319	0.523187	2.03739	2.48713	0.819172
24	LUX	Luxembourg	卢森堡	2015	D01T02	3.3	1.9	1.3	0.801608	0.156398	1	.	1	.	.	.	.	.	16.0361	105462	221.252	3.7131	4.5e+10	5.8e+10	19.7763	5.8e+10	101377	569604	1.1e+10	70.0119	69.6279	1.27204	1.3e+10	73.2	1.72328	34.2988	0.156398	4604.93	119	128	11.5396	0.223733	4.8009	0.482115	0.458777	0.567739	2.00963	2.507	0.801608
24	LUX	Luxembourg	卢森堡	2016	D01T02	3.7	1.8	1.9	0.768442	0.145336	1	.	1	.	.	.	.	.	15.2117	106899	226.072	.	1.8e+10	6.1e+10	19.5639	6.1e+10	104278	582014	1.1e+10	62.0647	69.7183	1.25831	3.2e+10	73.9	1.69856	34.8161	0.145336	4776.58	301	143	12.0959	0.214197	4.25378	0.063061	0.417716	0.560056	1.90944	2.48481	0.768442
24	LUX	Luxembourg	卢森堡	2017	D01T02	4.2	1.9	2.3	0.837152	0.161753	1	.	1	.	.	.	.	.	15.0885	110193	231.635	.	-27000000000	6.4e+10	19.1518	6.4e+10	107361	596336	1.2e+10	60.3482	69.8282	1.26852	-6800000000	75.9	1.65731	35.9897	0.161753	4960.21	512	156	10.8183	0.234573	5.01406	0.094459	0.459518	0.542536	1.98774	2.37441	0.837152
24	LUX	Luxembourg	卢森堡	2018	D01T02	3.5	1.9	1.6	0.840123	0.164739	1	.	1	.	.	.	.	.	15.3271	116787	236.147	.	-26000000000	7.1e+10	18.5905	7.1e+10	116597	607950	1.2e+10	57.2573	69.938	1.21126	-17000000000	76.4	1.72906	36.8967	0.164739	4738.48	243	152	10.9807	0.234654	4.59205	0.098012	0.458955	0.548154	2.02452	2.40979	0.840123
25	MEX	Mexico	墨西哥	1995	D01T02	3	1.6	1.4	1.3328	0.843268	0	.	1	.	.	.	.	.	3.41051	4002.16	46.2818	3.39037	9.5e+09	3.6e+11	15.4454	3.6e+11	3928.22	9.2e+07	5.9e+10	42.7604	58.5725	0.22514	9.5e+09	63.1	-0.399333	.	0.843268	.	4961	432	32.6921	4.42487	2.87546	10.2532	0.077743	0.046163	2.05795	1.54408	1.3328
25	MEX	Mexico	墨西哥	1996	D01T02	10.5	5.8	4.7	1.35004	0.829827	0	.	1	.	.	.	.	.	3.52344	4487.26	47.1136	3.22054	9.2e+09	4.1e+11	16.5788	4.1e+11	4412.12	9.3e+07	7.6e+10	45.7397	59.0507	0.25067	9.2e+09	61.2	-0.307893	.	0.829827	213.576	6365	386	33.9472	4.86847	2.02662	11.958	0.076613	0.048569	2.08266	1.54266	1.35004
25	MEX	Mexico	墨西哥	1997	D01T02	10.4	6	4.4	1.31576	0.831983	0	.	1	.	.	.	.	.	3.67533	5370.24	47.9349	3.33127	1.3e+10	5.0e+11	17.1859	5.0e+11	5289.17	9.5e+07	9.9e+10	44.6735	59.4897	0.2762	1.3e+10	57.1	-0.216453	.	0.831983	226.369	10111	420	34.1983	4.45029	1.88301	10.0272	0.074804	0.051361	2.02195	1.53672	1.31576
25	MEX	Mexico	墨西哥	1998	D01T02	6.4	3.6	2.8	1.2963	0.886379	0	.	1	.	.	.	.	.	3.85304	5555.71	48.7499	2.92682	1.3e+10	5.3e+11	18.2356	5.3e+11	5481.18	9.6e+07	1.1e+11	46.8245	59.8948	0.30196	1.3e+10	57.9	-0.125013	.	0.886379	216.873	10440	453	33.8838	4.1587	1.75187	5.94668	0.080101	0.058207	2.00127	1.54383	1.2963
25	MEX	Mexico	墨西哥	1999	D01T02	3.5	2	1.5	1.255	0.939981	0	.	1	.	.	.	.	.	3.68692	6230.7	49.5562	3.31573	1.4e+10	6.0e+11	19.2802	6.0e+11	6157.19	9.7e+07	1.3e+11	47.0609	60.2794	0.3441	1.4e+10	58.5	-0.0685	.	0.939981	224.435	11655	455	34.1243	3.68107	1.45462	7.13957	0.082387	0.063186	1.97129	1.57075	1.255
25	MEX	Mexico	墨西哥	2000	D01T02	0.7	0.6	0.1	1.2283	0.981524	0	.	1	.	.	.	.	.	3.87415	7232.91	50.3477	3.0408	1.8e+10	7.1e+11	20.491	7.1e+11	7157.81	9.9e+07	1.5e+11	48.8526	60.6526	0.30613	1.8e+10	59.3	-0.011987	0.015326	0.981524	224.751	12630	431	34.2097	3.32309	1.33083	9.66529	0.089438	0.069536	1.95676	1.59306	1.2283
25	MEX	Mexico	墨西哥	2001	D01T02	1	0.8	0.2	1.22879	0.958464	0	.	1	.	.	.	.	.	3.81139	7613.14	51.1301	2.79759	3.0e+10	7.6e+11	21.2629	7.6e+11	7544.57	1.0e+08	1.5e+11	43.8196	61.1015	0.32418	3.0e+10	60.6	0.037606	0.050305	0.958464	233.208	13031	534	33.2173	3.40327	1.25388	7.97372	0.078318	0.063725	1.93376	1.57371	1.22879
25	MEX	Mexico	墨西哥	2002	D01T02	1.3	1	0.3	1.21828	0.964742	0	.	1	.	.	.	.	.	3.82497	7650.93	51.9134	2.81482	2.0e+10	7.7e+11	22.1059	7.7e+11	7593.14	1.0e+08	1.5e+11	43.2284	61.5005	0.3543	2.4e+10	63	0.087198	0.229382	0.964742	306.162	12536	526	32.7104	3.27828	1.1541	8.89924	0.078247	0.063675	1.92236	1.57793	1.21828
25	MEX	Mexico	墨西哥	2003	D01T02	2	1.3	0.6	1.23787	0.971976	0	.	1	.	.	.	.	.	3.95094	7120.37	52.6913	2.69028	1.8e+10	7.3e+11	22.884	7.3e+11	7075.37	1.0e+08	1.4e+11	46.6774	61.863	0.39314	1.8e+10	65.3	0.050234	0.418211	0.971976	325.55	11739	468	31.1911	3.38749	1.21135	11.2327	0.084786	0.066298	1.97241	1.5934	1.23787
25	MEX	Mexico	墨西哥	2004	D01T02	5.9	2.7	3.2	1.22413	1.04819	0	.	1	.	.	.	.	.	3.98383	7525.49	53.4714	2.7301	2.5e+10	7.8e+11	23.6608	7.8e+11	7484.49	1.1e+08	1.6e+11	49.8875	62.2054	0.38816	2.5e+10	66	-0.003734	1.01715	1.04819	380.08	12633	565	32.8511	3.33919	1.63808	12.3852	0.090372	0.071629	1.94998	1.59295	1.22413
25	MEX	Mexico	墨西哥	2005	D01T02	25.1	9.4	15.7	1.18597	1.08575	0	.	1	.	.	.	.	.	4.0988	8321.86	54.2413	2.90064	2.5e+10	8.8e+11	24.2164	8.8e+11	8277.67	1.1e+08	1.8e+11	50.4227	62.5378	0.39844	2.6e+10	65.2	-0.100877	1.82313	1.08575	414.338	13851	584	32.7834	3.0732	1.82473	14.8856	0.094767	0.077125	1.93573	1.6322	1.18597
25	MEX	Mexico	墨西哥	2006	D01T02	29.9	10.4	19.5	1.17838	1.08637	0	.	1	.	.	.	.	.	4.19418	9125.39	54.9843	2.92018	2.2e+10	9.8e+11	24.7904	9.8e+11	9068.29	1.1e+08	2.1e+11	52.6393	62.8647	0.36922	2.2e+10	64.7	-0.118431	2.82542	1.08637	337.151	14931	574	34.1953	3.07583	2.37	15.4567	0.09531	0.079322	1.90113	1.61335	1.17838
25	MEX	Mexico	墨西哥	2007	D01T02	30.9	10	20.9	1.17709	1.05935	0	.	1	.	.	.	.	.	4.22076	9719.93	55.7128	2.83194	3.1e+10	1.1e+12	25.4211	1.1e+12	9642.68	1.1e+08	2.3e+11	53.3931	63.2387	0.39833	3.1e+10	66	-0.136095	4.15909	1.05935	347.438	15970	629	33.8351	3.18171	2.73048	15.6711	0.096395	0.079957	1.9008	1.61483	1.17709
25	MEX	Mexico	墨西哥	2008	D01T02	60.7	18.9	41.8	1.09551	0.954899	0	.	1	.	.	.	.	.	4.18973	10119.8	56.4235	3.19756	3.0e+10	1.1e+12	26.112	1.1e+12	10016.6	1.1e+08	2.6e+11	54.9167	63.6337	0.44387	3.0e+10	66.2	-0.175963	6.86755	0.954899	339.654	15896	685	34.7562	3.16038	2.63388	17.2232	0.089597	0.086606	1.80963	1.65187	1.09551
25	MEX	Mexico	墨西哥	2009	D01T02	23	7.8	15.2	1.18587	0.960947	0	.	1	.	.	.	.	.	4.0376	8104.92	57.1257	2.83138	2.0e+10	9.0e+11	26.5867	9.0e+11	8002.97	1.1e+08	2.0e+11	52.3559	64.0112	0.47954	2.0e+10	65.8	-0.15771	8.68187	0.960947	382.101	13459	822	31.8941	3.24149	2.48075	13.2781	0.091213	0.084608	1.96278	1.65514	1.18587
25	MEX	Mexico	墨西哥	2010	D01T02	40.6	13.9	26.7	1.16373	0.934009	0	.	1	.	.	.	.	.	4.11321	9399.96	57.8885	2.68215	3.1e+10	1.1e+12	27.5635	1.1e+12	9271.4	1.1e+08	2.3e+11	57.5259	64.3491	0.49485	3.1e+10	68.3	-0.1742	9.40428	0.934009	337.417	13625	951	32.3619	3.21915	2.9242	13.7682	0.09919	0.088908	1.91643	1.6468	1.16373
25	MEX	Mexico	墨西哥	2011	D01T02	107.3	33.3	74	1.14567	0.908294	0	.	1	.	.	.	.	.	4.19099	10341.5	58.7209	3.1178	2.4e+10	1.2e+12	28.3415	1.2e+12	10203.4	1.2e+08	2.6e+11	60.1985	64.6788	0.47129	2.4e+10	67.8	-0.151602	10.1323	0.908294	344.229	12990	1065	33.5568	3.08846	3.89168	15.9452	0.110083	0.093099	1.90329	1.6613	1.14567
25	MEX	Mexico	墨西哥	2012	D01T02	106.4	32.6	73.8	1.09402	0.906935	0	.	1	.	.	.	.	.	4.20242	10376.1	59.5468	2.77771	1.8e+10	1.2e+12	29.4718	1.2e+12	10241.7	1.2e+08	2.7e+11	62.5471	64.9568	0.42096	1.8e+10	65.3	-0.112647	11.2973	0.906935	248.085	14020	1294	33.7765	3.17392	3.71642	14.0567	0.107573	0.0961	1.82144	1.66491	1.09402
25	MEX	Mexico	墨西哥	2013	D01T02	98.1	27.9	70.3	1.09819	0.984256	0	.	1	.	.	.	.	.	4.05606	10865.7	60.3363	3.09235	5.1e+10	1.3e+12	30.3	1.3e+12	10725.2	1.2e+08	2.7e+11	60.4954	65.1953	0.42503	5.1e+10	67	-0.141332	10.8686	0.984256	251.8	14234	1210	31.8563	3.13878	3.0439	12.8122	0.11557	0.095379	1.84892	1.68361	1.09819
25	MEX	Mexico	墨西哥	2014	D01T02	66.9	20.8	46.1	1.11565	0.994779	0	.	1	.	.	.	.	.	3.89236	11076.1	61.09	3.42451	2.8e+10	1.3e+12	31.0941	1.3e+12	10928.9	1.2e+08	2.8e+11	61.4659	65.4188	0.43549	2.9e+10	66.8	-0.23599	10.9742	0.994779	260.189	14889	1246	31.4902	3.13209	2.28163	10.4122	0.120036	0.098267	1.88341	1.68818	1.11565
25	MEX	Mexico	墨西哥	2015	D01T02	55.9	19.4	36.5	1.14337	1.00156	0	.	1	.	.	.	.	.	3.92537	9753.4	61.8071	3.51721	3.6e+10	1.2e+12	31.819	1.2e+12	9616.65	1.2e+08	2.6e+11	67.0581	65.6393	0.42986	3.6e+10	66.4	-0.253298	12.2827	1.00156	281.324	16707	1364	29.9853	3.19192	1.99392	5.89079	0.128727	0.104312	1.90868	1.66935	1.14337
25	MEX	Mexico	墨西哥	2016	D01T02	44.7	17.3	27.4	1.16342	1.00145	0	.	1	.	.	.	.	.	3.89498	8875.08	62.5115	.	3.9e+10	1.1e+12	38.4334	1.1e+12	8744.52	1.2e+08	2.5e+11	71.5324	65.8218	0.38798	3.9e+10	65.2	-0.259177	13.1041	1.00145	315.27	16103	1310	29.64	3.34646	2.16352	4.82277	0.133909	0.104755	1.91437	1.64547	1.16342
25	MEX	Mexico	墨西哥	2017	D01T02	45.3	18	27.3	1.15415	0.983656	0	.	1	.	.	.	.	.	3.83899	9434.38	63.1905	.	3.3e+10	1.2e+12	40.229	1.2e+12	9287.85	1.3e+08	2.6e+11	72.6208	66.02	0.32843	3.3e+10	63.6	-0.353621	13.8396	0.983656	313.562	15850	1334	30.9462	3.38107	2.23108	5.50775	0.132516	0.105426	1.89383	1.64088	1.15415
25	MEX	Mexico	墨西哥	2018	D01T02	86.1	28.6	57.5	1.14822	1.01453	0	.	1	.	.	.	.	.	3.64933	9857.01	63.7948	.	3.8e+10	1.2e+12	41.5228	1.2e+12	9686.51	1.3e+08	2.7e+11	75.8588	66.2195	0.31291	3.8e+10	64.8	-0.352888	14.8039	1.01453	310.557	14869	1555	31.1488	3.3838	2.31464	6.5679	0.13925	0.112397	1.8908	1.64672	1.14822
26	NLD	Netherlands	荷兰	1995	D01T02	9.3	4.5	4.7	1.1126	2.75427	1	.	1	.	.	.	.	.	10.6156	29258.1	457.909	1.71456	1.2e+10	4.5e+11	47.4652	4.5e+11	29258.1	1.5e+07	9.5e+10	85.8726	68.4982	1.83709	1.2e+10	69	1.73604	.	2.75427	.	569	2123	24.0685	3.10426	2.73827	7.0934	0.371995	0.189194	2.2472	2.01978	1.1126
26	NLD	Netherlands	荷兰	1996	D01T02	4.9	2.3	2.6	1.09059	2.61401	1	.	1	.	.	.	.	.	11.1795	29006.8	460.027	1.73158	1.7e+10	4.5e+11	48.1175	4.5e+11	29006.8	1.6e+07	9.7e+10	88.7748	68.3414	1.84093	1.7e+10	69.7	1.77404	.	2.61401	2283.26	633	2348	23.6768	2.87733	2.32034	8.19873	0.360807	0.199876	2.26429	2.0762	1.09059
26	NLD	Netherlands	荷兰	1997	D01T02	6.9	3.3	3.6	1.07426	2.30425	1	.	1	.	.	.	.	.	10.6537	26700.5	462.401	1.26485	1.1e+10	4.2e+11	47.4135	4.2e+11	26700.5	1.6e+07	9.0e+10	95.6216	68.2108	1.84477	1.1e+10	70.4	1.81204	.	2.30425	2430.65	637	2391	22.731	2.96792	2.35442	7.22294	0.333355	0.19136	2.17915	2.02851	1.07426
26	NLD	Netherlands	荷兰	1998	D01T02	11.5	5.7	5.8	1.07633	2.47368	1	.	1	.	.	.	.	.	10.6152	27885.8	465.261	1.76546	3.8e+10	4.4e+11	47.9475	4.4e+11	27885.8	1.6e+07	9.6e+10	93.5179	68.1081	1.74206	3.8e+10	69.2	1.85003	0.480201	2.47368	2482.02	549	2451	22.3571	2.55697	2.37998	6.40445	0.352435	0.193551	2.23127	2.07305	1.07633
26	NLD	Netherlands	荷兰	1999	D01T02	23.6	12	11.5	1.05876	2.48679	1	.	1	.	.	.	.	.	10.2103	28272.6	468.368	1.8363	4.1e+10	4.5e+11	49.8025	4.5e+11	28263.1	1.6e+07	1.0e+11	95.0419	68.0245	1.82282	4.1e+10	70.2	1.87942	.	2.48679	2639.82	506	2545	21.6577	2.32967	2.18775	6.67492	0.356919	0.198692	2.21123	2.08852	1.05876
26	NLD	Netherlands	荷兰	2000	D01T02	14	6.2	7.8	1.07296	2.4778	1	.	1	.	.	.	.	.	10.1784	26214.5	471.727	1.88525	6.3e+10	4.2e+11	52.2848	4.2e+11	26149.4	1.6e+07	9.4e+10	108.394	67.9501	1.7898	6.3e+10	70.4	1.90881	1.63531	2.4778	2649.35	529	2465	21.7404	2.29864	1.8738	8.35783	0.36513	0.204551	2.24246	2.08997	1.07296
26	NLD	Netherlands	荷兰	2001	D01T02	15.5	7.2	8.3	1.06975	2.49589	1	.	1	.	.	.	.	.	10.4147	26896.5	475.302	1.84283	5.2e+10	4.3e+11	54.1921	4.3e+11	26873.3	1.6e+07	9.6e+10	101.92	67.8735	1.79609	5.2e+10	73	1.82984	2.9171	2.49589	2846.71	543	2110	21.8934	2.22462	1.66429	6.19109	0.360384	0.199989	2.23203	2.0865	1.06975
26	NLD	Netherlands	荷兰	2002	D01T02	28.2	14.3	13.9	1.04284	2.57015	1	.	1	.	.	.	.	.	10.3678	29343.2	478.345	1.82199	2.5e+10	4.7e+11	55.191	4.7e+11	29204	1.6e+07	9.9e+10	98.242	67.7787	1.74543	2.6e+10	75.1	1.75088	7.29254	2.57015	2723.4	481	2122	21.1475	2.07768	1.72917	5.58956	0.355893	0.202878	2.18498	2.09523	1.04284
26	NLD	Netherlands	荷兰	2003	D01T02	34.7	17.8	16.9	1.0465	2.61231	1	.	1	.	.	.	.	.	10.4998	35751	480.607	1.82981	2.0e+10	5.8e+11	55.7433	5.8e+11	35672.2	1.6e+07	1.2e+11	96.8769	67.6777	1.7839	2.1e+10	74.6	1.71005	12.3267	2.61231	2703.85	573	2288	20.7787	2.05983	1.98322	5.65504	0.355728	0.196918	2.17412	2.07751	1.0465
26	NLD	Netherlands	荷兰	2004	D01T02	34.6	15.3	19.3	1.01294	2.5118	1	.	1	.	.	.	.	.	10.5711	40436.6	482.28	1.80023	1.4e+11	6.6e+11	56.978	6.6e+11	40362.4	1.6e+07	1.3e+11	103.03	67.5957	1.78901	1.4e+11	74.5	1.72307	19.795	2.5118	2971.78	556	2187	20.7102	1.86629	2.21741	5.86902	0.347606	0.207894	2.17115	2.14342	1.01294
26	NLD	Netherlands	荷兰	2005	D01T02	44.4	16.9	27.5	1.02687	2.53033	1	.	1	.	.	.	.	.	10.2897	41994.7	483.408	1.92629	2.1e+11	6.9e+11	58.6898	6.9e+11	41979.1	1.6e+07	1.4e+11	112.422	67.546	1.77388	2.1e+11	72.9	1.66462	25.2124	2.53033	2923.78	633	2217	21.0232	1.85793	2.25394	7.50883	0.350036	0.207088	2.19476	2.13733	1.02687
26	NLD	Netherlands	荷兰	2006	D01T02	47.5	16.9	30.5	1.03238	2.53643	1	.	1	.	.	.	.	.	10.0148	44900.9	484.185	1.90058	3.8e+11	7.3e+11	59.6595	7.3e+11	44863.4	1.6e+07	1.5e+11	120.062	67.4205	1.74067	3.8e+11	75.4	1.62462	31.8039	2.53643	3232.95	548	2168	21.2064	1.94595	2.86763	8.62717	0.341851	0.201708	2.18496	2.11643	1.03238
26	NLD	Netherlands	荷兰	2007	D01T02	58.5	19.1	39.4	1.0124	2.38118	1	.	1	.	.	.	.	.	10.0448	51799.2	485.24	2.2252	7.3e+11	8.5e+11	59.942	8.5e+11	51733.4	1.6e+07	2.0e+11	123.114	67.3682	1.6703	7.3e+11	75.5	1.63111	33.5972	2.38118	3093.12	367	2079	21.1551	1.81711	2.9219	8.87017	0.352447	0.222639	2.21972	2.19254	1.0124
26	NLD	Netherlands	荷兰	2008	D01T02	69.9	22.2	47.8	0.983474	2.01697	1	.	1	.	.	.	.	.	10.0466	57879.9	487.132	2.37487	2.0e+11	9.5e+11	60.3362	9.5e+11	57644.5	1.6e+07	2.1e+11	128.572	67.3343	1.62269	2.0e+11	77.4	1.61649	35.2657	2.01697	3061.73	311	2421	21.51	1.63505	2.34975	10.7064	0.350143	0.243152	2.25799	2.29593	0.983474
26	NLD	Netherlands	荷兰	2009	D01T02	60.6	20.6	40	0.961088	2.14183	1	.	1	.	.	.	.	.	9.70868	52722.2	490.08	2.4835	9.6e+10	8.7e+11	61.167	8.7e+11	52514	1.7e+07	1.9e+11	108.406	67.2387	1.6657	9.6e+10	77	1.63297	37.0641	2.14183	2824.31	279	2575	20.3085	1.55319	1.90002	8.24329	0.340506	0.231284	2.20242	2.29159	0.961088
26	NLD	Netherlands	荷兰	2010	D01T02	75.5	25.2	50.3	0.992449	2.10714	1	.	1	.	.	.	.	.	10.2983	50999.7	492.6	2.22768	1.2e+11	8.5e+11	63.716	8.5e+11	50950	1.7e+07	1.7e+11	128.835	67.0403	1.70404	1.2e+11	75	1.63589	38.0872	2.10714	3219.04	240	2527	19.6942	1.77851	2.36956	10.1639	0.351091	0.232274	2.21583	2.23269	0.992449
26	NLD	Netherlands	荷兰	2011	D01T02	106.8	33.3	73.4	0.970626	1.8591	1	.	1	.	.	.	.	.	9.51101	54230.3	495.05	2.6674	3.3e+11	9.0e+11	75.8785	9.0e+11	54159.3	1.7e+07	1.8e+11	139.53	66.7768	1.88131	3.3e+11	74.7	1.69892	38.9068	1.8591	3664.37	310	2585	20.0661	1.57897	2.83195	12.7908	0.369867	0.265127	2.30094	2.37058	0.970626
26	NLD	Netherlands	荷兰	2012	D01T02	104.4	32.5	71.9	0.970898	1.83949	1	.	1	.	.	.	.	.	9.39861	50070.1	496.885	2.68353	2.4e+11	8.4e+11	76.6067	8.4e+11	50073	1.7e+07	1.6e+11	148.074	66.4099	1.91627	2.4e+11	73.3	1.72305	39.6418	1.83949	4361.35	338	2375	20.0182	1.6595	2.55236	14.4575	0.362953	0.260519	2.2948	2.36359	0.970898
26	NLD	Netherlands	荷兰	2013	D01T02	112	31.8	80.2	0.99799	1.83394	1	.	1	.	.	.	.	.	9.34814	52198.9	498.796	2.51509	3.3e+11	8.8e+11	77.9278	8.8e+11	52184.1	1.7e+07	1.6e+11	143.827	65.9935	1.92987	3.3e+11	73.5	1.69105	40.2671	1.83394	4915.66	449	2315	19.3342	1.79086	2.28351	14.43	0.359742	0.252916	2.32172	2.32639	0.99799
26	NLD	Netherlands	荷兰	2014	D01T02	122.3	35	87.4	0.992174	1.7227	1	.	1	.	.	.	.	.	8.88191	52900.5	500.594	3.12654	1.2e+11	8.9e+11	79.2488	8.9e+11	52830.2	1.7e+07	1.6e+11	141.639	65.6163	1.97568	1.2e+11	74.2	1.69161	40.4091	1.7227	4955.45	288	2294	18.4124	1.73834	2.48091	12.5669	0.349609	0.2494	2.27766	2.29563	0.992174
26	NLD	Netherlands	荷兰	2015	D01T02	124.1	33.5	90.6	0.977629	1.63728	1	.	1	.	.	.	.	.	9.29229	45193.4	503.116	3.3738	3.3e+11	7.7e+11	80.5699	7.7e+11	45175.2	1.7e+07	1.7e+11	141.46	65.3242	1.98487	3.2e+11	73.7	1.65788	41.2479	1.63728	4928.89	287	2207	18.186	1.72433	2.46168	10.2507	0.353022	0.267665	2.21784	2.26859	0.977629
26	NLD	Netherlands	荷兰	2016	D01T02	117	34.1	82.9	1.00746	1.65926	1	.	1	.	.	.	.	.	9.30901	46039.1	505.801	.	2.4e+11	7.8e+11	80.3648	7.8e+11	46007.9	1.7e+07	1.6e+11	136.741	65.0519	1.99685	2.3e+11	74.6	1.6783	42.178	1.65926	5159.32	314	2290	17.6375	1.76653	2.27817	9.149	0.352609	0.250593	2.2445	2.22789	1.00746
26	NLD	Netherlands	荷兰	2017	D01T02	131.5	40	91.5	1.02451	1.61313	1	.	1	.	.	.	.	.	9.092	48675.2	508.8	.	2.3e+11	8.3e+11	84.9805	8.3e+11	48555	1.7e+07	1.7e+11	147.475	64.8547	1.98308	2.1e+11	75.8	1.68114	42.3636	1.61313	5347.58	365	2241	17.7031	1.85559	2.39673	10.2777	0.354508	0.250002	2.25398	2.20005	1.02451
26	NLD	Netherlands	荷兰	2018	D01T02	148.9	46.8	102.2	0.995568	1.64081	1	.	1	.	.	.	.	.	8.78403	53044.5	511.78	.	-330000000000	9.1e+11	87.0978	9.1e+11	53018.6	1.7e+07	1.9e+11	150.197	64.6956	2.16374	-350000000000	76.2	1.69314	42.8479	1.64081	5596.57	394	2111	17.8057	1.65067	2.47908	10.7425	0.374153	0.261439	2.21769	2.22756	0.995568
27	NZL	New Zealand	新西兰	1995	D01T02	31.3	18	13.3	1.29994	2.73847	1	.	1	.	.	.	.	.	6.62215	17399.9	13.9509	15.9478	2.8e+09	6.4e+10	58.2599	6.4e+10	17400.4	3.7e+06	1.4e+10	43.183	65.4372	1.14911	2.9e+09	77.2	1.7594	.	2.73847	.	3435	1284	25.7232	6.45081	4.97525	1.63502	0.244581	0.115209	2.74407	2.11092	1.29994
27	NZL	New Zealand	新西兰	1996	D01T02	35.1	20.5	14.6	1.34652	2.6878	1	.	1	.	.	.	.	.	6.80943	18794.4	14.1734	15.0095	3.9e+09	7.0e+10	59.2618	7.0e+10	18794.4	3.7e+06	1.6e+10	41.468	65.3545	1.1028	3.9e+09	78.1	1.7672	.	2.6878	.	6192	1275	25.0621	6.43713	4.3367	2.3048	0.249083	0.112685	2.82762	2.09994	1.34652
27	NZL	New Zealand	新西兰	1997	D01T02	35.7	20.6	15.1	1.30156	2.63883	1	.	1	.	.	.	.	.	7.32261	17473.7	14.3606	13.1886	1.9e+09	6.6e+10	60.3207	6.6e+10	17474.2	3.8e+06	1.5e+10	43.499	65.3112	1.05649	1.9e+09	79	1.775	.	2.63883	2202.41	8259	1572	24.8123	6.07737	4.74514	2.14177	0.251441	0.120494	2.81235	2.16076	1.30156
27	NZL	New Zealand	新西兰	1998	D01T02	42.1	23.3	18.9	1.28922	2.39833	1	.	1	.	.	.	.	.	7.12472	14738.3	14.4886	14.4529	1.8e+09	5.6e+10	61.3795	5.6e+10	14738.4	3.8e+06	1.2e+10	43.7155	65.3251	1.01018	1.8e+09	79.2	1.7828	.	2.39833	.	4519	1181	23.8097	5.94612	4.89667	2.06312	0.244847	0.124887	2.79669	2.16929	1.28922
27	NZL	New Zealand	新西兰	1999	D01T02	50.8	25.8	25	1.29865	2.7082	1	.	1	.	.	.	.	.	7.4608	15322.2	14.565	13.1349	9.4e+08	5.9e+10	62.4384	5.9e+10	15322.2	3.8e+06	1.3e+10	45.5939	65.3859	0.96387	9.4e+08	81.7	1.76754	.	2.7082	2296.41	6541	1420	24.0574	6.27578	4.6172	2.1607	0.252106	0.127517	2.78968	2.14814	1.29865
27	NZL	New Zealand	新西兰	2000	D01T02	60	27.2	32.9	1.35171	2.95014	1	.	1	.	.	.	.	.	7.63538	13641	14.6508	13.2749	-1500000000	5.3e+10	63.4973	5.3e+10	13641.1	3.9e+06	1.1e+10	51.69	65.4683	1.03208	-1500000000	80.9	1.75227	0.120822	2.95014	.	5585	1463	23.59	7.7529	4.88864	2.97081	0.270813	0.12169	2.85215	2.11003	1.35171
27	NZL	New Zealand	新西兰	2001	D01T02	94.7	39.1	55.6	1.35327	2.82017	1	.	1	.	.	.	.	.	8.14813	13882.9	14.7374	12.1296	2.6e+08	5.4e+10	64.5562	5.4e+10	13882.9	3.9e+06	1.2e+10	50.1889	65.6744	1.10029	2.6e+08	81.1	1.7359	0.44393	2.82017	2642.96	5507	1768	23.1097	7.98138	4.31066	2.68194	0.262154	0.119102	2.84616	2.10318	1.35327
27	NZL	New Zealand	新西兰	2002	D01T02	158.5	51.7	106.7	1.24143	2.6181	1	.	1	.	.	.	.	.	7.98863	16874.2	14.9956	13.6179	2.8e+09	6.7e+10	65.6151	6.7e+10	16874.2	3.9e+06	1.5e+10	44.1708	65.8571	1.1246	2.9e+09	80.7	1.71954	1.10166	2.6181	.	5109	1839	23.8584	5.85289	4.12795	2.36517	0.252433	0.133699	2.8323	2.28148	1.24143
27	NZL	New Zealand	新西兰	2003	D01T02	151.7	54.3	97.4	1.26296	2.53169	1	.	1	.	.	.	.	.	8.29301	21913.7	15.2945	13.2728	-3400000000	8.8e+10	66.674	8.8e+10	21913.7	4.0e+06	2.1e+10	39.7571	66.0313	1.14891	-3400000000	81.1	1.75717	2.06471	2.53169	3073.79	5028	1845	23.2578	5.72933	3.79454	1.91617	0.238015	0.121874	2.78788	2.20742	1.26296
27	NZL	New Zealand	新西兰	2004	D01T02	174.5	56.3	118.2	1.24289	2.66478	1	.	1	.	.	.	.	.	8.0333	25420.3	15.5235	14.6002	2.3e+09	1.0e+11	67.7328	1.0e+11	25420.2	4.1e+06	2.5e+10	41.9026	66.21	1.13467	2.3e+09	81.5	1.85425	4.69679	2.66478	.	4900	1631	23.5522	5.36559	3.99378	1.94342	0.246307	0.128742	2.76829	2.22729	1.24289
27	NZL	New Zealand	新西兰	2005	D01T02	159.5	43.5	116.1	1.17582	2.72621	1	.	1	.	.	.	.	.	8.28085	27751.1	15.6997	13.6668	1.9e+09	1.1e+11	68.7917	1.2e+11	27751.1	4.1e+06	2.8e+10	41.7965	66.3921	1.12043	1.9e+09	82.3	1.72023	7.76717	2.72621	3140.24	5112	1893	23.9418	4.5177	4.32049	2.51999	0.244514	0.142423	2.7647	2.3513	1.17582
27	NZL	New Zealand	新西兰	2006	D01T02	168.2	41	127.2	1.19281	2.75075	1	.	1	.	.	.	.	.	8.18857	26654.6	15.8923	13.9364	2.9e+09	1.1e+11	69.8506	1.1e+11	26654.6	4.2e+06	2.7e+10	43.7812	66.466	1.13848	2.9e+09	82	1.69657	11.2489	2.75075	.	5212	2153	22.9954	4.98361	5.38991	2.81028	0.246867	0.136167	2.67711	2.24438	1.19281
27	NZL	New Zealand	新西兰	2007	D01T02	235.9	51.9	184	1.27539	2.67902	1	.	1	.	.	.	.	.	7.87691	32480	16.0412	14.0591	4.3e+09	1.4e+11	70.9095	1.4e+11	32480	4.2e+06	3.3e+10	42.1499	66.5215	1.15653	4.3e+09	81.4	1.71223	20.2066	2.67902	3449.05	5952	1892	22.969	6.06837	5.25124	4.55786	0.242097	0.122236	2.7527	2.15833	1.27539
27	NZL	New Zealand	新西兰	2008	D01T02	407.9	85.1	322.8	1.18536	2.7747	1	.	1	.	.	.	.	.	8.02042	31253	16.1779	13.3848	2.6e+09	1.3e+11	71.9684	1.3e+11	31253	4.3e+06	3.0e+10	48.7856	66.5467	1.20442	2.6e+09	80.7	1.71594	21.4768	2.7747	.	4468	1256	23.2427	5.01251	4.45123	7.1123	0.283462	0.157724	2.76289	2.33084	1.18536
27	NZL	New Zealand	新西兰	2009	D01T02	469.6	117.1	352.5	1.26258	2.68398	1	.	1	.	.	.	.	.	7.24439	28209.4	16.3404	14.6712	-52000000	1.2e+11	73.0273	1.2e+11	28209.4	4.3e+06	2.5e+10	41.6128	66.5258	1.2523	-52000000	82	1.7582	23.7593	2.68398	3723.98	4803	1555	21.4048	5.75069	3.32762	5.00698	0.255571	0.123072	2.76037	2.18629	1.26258
27	NZL	New Zealand	新西兰	2010	D01T02	603	172.9	430.1	1.30939	2.85358	1	.	1	.	.	.	.	.	7.13662	33676.8	16.5231	14.5378	2.9e+08	1.5e+11	74.0861	1.5e+11	33676.8	4.4e+06	2.9e+10	42.3246	66.4498	1.24148	2.9e+08	82.1	1.76379	25.1246	2.85358	.	5051	1585	21.1757	6.58792	4.16724	4.94449	0.265171	0.120619	2.75122	2.10114	1.30939
27	NZL	New Zealand	新西兰	2011	D01T02	851.6	211.7	639.9	1.28036	2.8972	1	.	1	.	.	.	.	.	6.90937	38387.6	16.6496	14.8369	1.4e+09	1.7e+11	75.145	1.7e+11	38387.6	4.4e+06	3.4e+10	44.4313	66.2132	1.23065	1.4e+09	82.3	1.83436	26.8872	2.8972	3688.89	4708	1501	20.9947	6.28424	3.96696	5.48843	0.280159	0.131165	2.77018	2.1636	1.28036
27	NZL	New Zealand	新西兰	2012	D01T02	929.1	207.6	721.6	1.23182	2.82632	1	.	1	.	.	.	.	.	7.28373	39973.4	16.7411	13.1741	3.8e+09	1.8e+11	76.2039	1.8e+11	39973.4	4.4e+06	3.7e+10	42.8809	66.0024	1.1922	3.9e+09	82.1	1.80659	28.8417	2.82632	.	5674	1425	20.9234	5.51752	3.55947	4.93027	0.276484	0.140392	2.78007	2.25688	1.23182
27	NZL	New Zealand	新西兰	2013	D01T02	1119.7	225	894.7	1.3591	3.10468	1	.	1	.	.	.	.	.	7.17802	42976.6	16.8702	13.4253	-70000000	1.9e+11	77.2628	1.9e+11	42976.6	4.4e+06	4.1e+10	41.4265	65.8021	1.15375	-70000000	81.4	1.81123	29.5688	3.10468	3961.48	5167	1614	20.2876	7.03372	3.26836	3.71999	0.279833	0.114981	2.82639	2.07961	1.3591
27	NZL	New Zealand	新西兰	2014	D01T02	1114.4	225.3	889.1	1.21154	3.01537	1	.	1	.	.	.	.	.	7.07864	44572.9	17.1528	13.5168	3.3e+09	2.0e+11	77.9813	2.0e+11	44572.9	4.5e+06	4.5e+10	41.7955	65.5968	1.19303	3.3e+09	81.2	1.85613	31.2348	3.01537	.	6092	1636	21.3776	4.77686	3.04246	3.22931	0.292156	0.14762	2.84841	2.35107	1.21154
27	NZL	New Zealand	新西兰	2015	D01T02	861.9	168.7	693.2	1.21411	2.78709	1	.	1	.	.	.	.	.	7.00334	38630.7	17.5056	13.9876	-73000000	1.8e+11	80.5634	1.8e+11	38630.7	4.6e+06	4.1e+10	39.8221	65.382	1.2323	-73000000	82.1	1.86041	31.606	2.78709	5417.67	5317	1184	21.1608	4.47129	3.13508	1.8951	0.284516	0.145707	2.83269	2.33314	1.21411
27	NZL	New Zealand	新西兰	2016	D01T02	933.1	175.2	757.9	1.29387	2.93648	1	.	1	.	.	.	.	.	6.61541	40058.2	17.9032	.	2.0e+09	1.9e+11	81.7704	1.9e+11	40080.5	4.7e+06	4.3e+10	36.9608	65.1903	1.28961	1.9e+09	81.6	1.86188	32.7865	2.93648	.	5311	1075	20.0958	5.55164	3.14488	1.45945	0.268511	0.118344	2.78937	2.15584	1.29387
27	NZL	New Zealand	新西兰	2017	D01T02	1265.1	223.2	1041.9	1.31576	3.17427	1	.	1	.	.	.	.	.	6.84049	42911	18.2811	.	2.4e+09	2.1e+11	82.0332	2.1e+11	42992.9	4.8e+06	4.8e+10	37.7868	64.9544	1.34692	2.1e+09	83.7	1.86045	33.3526	3.17427	5104.17	5146	1014	20.4605	5.91292	3.02877	1.67397	0.27852	0.116218	2.78885	2.11956	1.31576
27	NZL	New Zealand	新西兰	2018	D01T02	1401.8	242.8	1158.9	1.30071	3.38753	1	.	1	.	.	.	.	.	6.60233	43236.9	18.6115	.	2.5e+09	2.1e+11	82.983	2.1e+11	43306.1	4.9e+06	5.0e+10	39.3289	64.6941	1.40423	2.6e+09	84.2	1.81084	34.0524	3.38753	.	5221	1017	20.3195	5.66258	3.01806	1.81398	0.296306	0.126688	2.81468	2.16395	1.30071
28	NOR	Norway	挪威	1995	D01T02	0.2	0.2	0	1.26979	0.052493	1	.	1	.	.	.	.	.	7.88891	34875.9	11.935	37.9394	2.4e+09	1.5e+11	54.148	1.5e+11	34875.7	4.4e+06	3.3e+10	49.3062	64.5314	1.58165	2.4e+09	65.7	1.75756	.	0.052493	.	4280	1128	28.7931	2.58956	8.72328	47.2802	0.08594	0.117569	2.38237	1.87619	1.26979
28	NOR	Norway	挪威	1996	D01T02	0.2	0.2	0	1.24628	0.046819	1	.	1	.	.	.	.	.	7.89647	37321.9	11.9956	38.8117	3.8e+09	1.6e+11	58.0536	1.6e+11	37322	4.4e+06	3.6e+10	52.1404	64.5119	1.58757	3.8e+09	65.4	1.76056	.	0.046819	.	4336	1291	30.9688	2.22714	7.01734	54.6573	0.093544	0.128145	2.40018	1.92588	1.24628
28	NOR	Norway	挪威	1997	D01T02	0.3	0.3	0	1.21615	0.044778	1	.	1	.	.	.	.	.	8.29562	36629	12.0609	37.0393	4.5e+09	1.6e+11	61.5003	1.6e+11	36629	4.4e+06	3.8e+10	52.2142	64.5237	1.5935	4.5e+09	65.1	1.76356	.	0.044778	3956.78	4959	1256	31.473	2.06179	7.11668	53.788	0.093533	0.139084	2.3822	1.95881	1.21615
28	NOR	Norway	挪威	1998	D01T02	0.3	0.3	0	1.23012	0.05263	1	.	1	.	.	.	.	.	8.54966	34803.5	12.1329	37.3719	5.6e+09	1.5e+11	62.8047	1.5e+11	34788.4	4.4e+06	4.1e+10	50.5127	64.5671	1.59943	5.7e+09	68	1.76656	.	0.05263	.	5006	1213	27.6001	2.26423	8.58571	43.2754	0.086774	0.134785	2.34792	1.90869	1.23012
28	NOR	Norway	挪威	1999	D01T02	0.4	0.3	0	1.22364	0.052088	1	.	1	.	.	.	.	.	8.89746	36393.4	12.2163	35.6261	5.8e+09	1.6e+11	66.3625	1.6e+11	36371.1	4.5e+06	3.8e+10	49.0626	64.6452	1.60535	5.8e+09	68.6	1.73054	.	0.052088	4089.18	5255	1335	29.5652	2.05185	7.21313	49.9467	0.092188	0.13003	2.36358	1.9316	1.22364
28	NOR	Norway	挪威	2000	D01T02	0.4	0.4	0	1.21432	0.046213	1	.	1	.	.	.	.	.	7.63613	38178.1	12.2958	36.074	8.3e+09	1.7e+11	69.2786	1.7e+11	38131.5	4.5e+06	3.4e+10	55.1536	64.7601	1.58397	8.3e+09	70.1	1.69451	0.518725	0.046213	.	5389	1311	36.4948	1.82302	6.07442	63.8969	0.10807	0.132482	2.31253	1.90438	1.21432
28	NOR	Norway	挪威	2001	D01T02	0.3	0.3	0	1.14397	0.043765	1	.	1	.	.	.	.	.	7.69156	38602.1	12.3582	35.8987	3.2e+09	1.7e+11	70.2231	1.7e+11	38542.7	4.5e+06	3.4e+10	52.9659	64.8879	1.56259	3.2e+09	67.1	1.70645	1.96147	0.043765	4352.06	5242	1189	35.2056	1.58869	5.99753	61.7534	0.099638	0.135962	2.22602	1.94587	1.14397
28	NOR	Norway	挪威	2002	D01T02	0.9	0.7	0.2	1.09323	0.049434	1	.	1	.	.	.	.	.	7.57274	43170.7	12.425	37.6431	3.0e+09	2.0e+11	73.3267	2.0e+11	43084.5	4.5e+06	3.8e+10	48.3495	65.0521	1.6297	3.0e+09	67.4	1.71839	4.52374	0.049434	.	5109	1178	33.2345	1.52073	6.08306	60.6325	0.084651	0.135739	2.16398	1.97943	1.09323
28	NOR	Norway	挪威	2003	D01T02	0.8	0.6	0.2	1.07489	0.046729	1	.	1	.	.	.	.	.	8.14262	50250.2	12.4981	32.7345	4.2e+09	2.3e+11	79.0672	2.3e+11	50134.9	4.6e+06	4.3e+10	47.355	65.2391	1.67958	4.2e+09	67.2	1.6604	8.7348	0.046729	4495.91	4782	1079	33.3948	1.30804	6.64523	61.1729	0.082904	0.142803	2.15384	2.00377	1.07489
28	NOR	Norway	挪威	2004	D01T02	0.5	0.4	0.2	1.11404	0.050731	1	.	1	.	.	.	.	.	8.13176	57768.4	12.5722	34.9588	4.9e+09	2.6e+11	79.2277	2.7e+11	57603.8	4.6e+06	5.2e+10	49.5483	65.421	1.54416	4.9e+09	66.2	1.72507	14.626	0.050731	4493.55	4348	1142	34.9961	1.38647	6.9226	63.6222	0.089652	0.144836	2.20609	1.98025	1.11404
28	NOR	Norway	挪威	2005	D01T02	0.5	0.3	0.2	1.103	0.047123	1	.	1	.	.	.	.	.	7.86265	67047.2	12.6581	35.5405	1.0e+10	3.1e+11	78.5234	3.1e+11	66810.5	4.6e+06	6.3e+10	51.5556	65.5728	1.48239	1.0e+10	64.5	1.70254	21.4407	0.047123	4576.56	4843	1143	37.9667	1.40343	6.00833	67.6843	0.094889	0.148075	2.22792	2.01987	1.103
28	NOR	Norway	挪威	2006	D01T02	0.7	0.4	0.4	1.10622	0.047119	1	.	1	.	.	.	.	.	7.98071	74434.1	12.7604	33.9533	1.2e+10	3.5e+11	77.6709	3.5e+11	74148.3	4.7e+06	7.2e+10	53.9581	65.7861	1.45532	1.2e+10	67.9	1.66826	26.7006	0.047119	4831.93	4957	1119	39.6638	1.40445	7.13925	67.8035	0.092636	0.147888	2.23229	2.01794	1.10622
28	NOR	Norway	挪威	2007	D01T02	0.4	0.3	0.2	1.13291	0.047591	1	.	1	.	.	.	.	.	8.01562	85502.8	12.8932	34.3868	2.5e+10	4.0e+11	75.49	4.0e+11	85140	4.7e+06	9.5e+10	54.0362	65.9698	1.56457	2.5e+10	67.9	1.66473	30.9426	0.047591	5159.68	5431	1225	37.1778	1.23987	8.32265	64.2968	0.096389	0.152176	2.31738	2.04552	1.13291
28	NOR	Norway	挪威	2008	D01T02	0.9	0.4	0.4	1.09514	0.04072	1	.	1	.	.	.	.	.	7.73277	97503.5	13.0549	29.9645	2.1e+10	4.6e+11	72.5935	4.6e+11	96944.1	4.8e+06	1.1e+11	56.6916	66.1237	1.55448	2.1e+10	68.6	1.65412	33.0791	0.04072	5361.12	4280	1150	40.2948	1.128	5.55183	68.6854	0.103846	0.158112	2.26516	2.06838	1.09514
28	NOR	Norway	挪威	2009	D01T02	0.6	0.4	0.1	1.0734	0.042369	1	.	1	.	.	.	.	.	7.7506	80347.1	13.2205	28.7333	8.6e+09	3.9e+11	73.1796	3.9e+11	79977.7	4.8e+06	9.0e+10	48.0975	66.2394	1.72472	8.6e+09	70.2	1.66818	34.5447	0.042369	5443.1	2358	1246	34.3017	1.30032	5.13787	63.6629	0.091314	0.158577	2.23927	2.08614	1.0734
28	NOR	Norway	挪威	2010	D01T02	0.8	0.5	0.3	1.25692	0.043833	1	.	1	.	.	.	.	.	8.47035	88163.2	13.3863	27.8036	2.2e+10	4.3e+11	73.4939	4.3e+11	87693.8	4.9e+06	8.9e+10	48.5093	66.3011	1.64999	2.2e+10	69.4	1.71719	35.2443	0.043833	5413.77	696	1117	34.7683	1.5686	6.32367	63.6984	0.121872	0.166359	2.59877	2.06757	1.25692
28	NOR	Norway	挪威	2011	D01T02	0.6	0.4	0.2	1.26825	0.032722	1	.	1	.	.	.	.	.	7.99534	101222	13.561	32.1832	1.0e+10	5.0e+11	73.6679	5.0e+11	100601	5.0e+06	1.1e+11	50.4119	66.2113	1.62712	1.0e+10	70.3	1.73903	36.0483	0.032722	5502.46	654	1122	37.0265	1.34466	5.94343	68.0284	0.134334	0.177101	2.69706	2.12661	1.26825
28	NOR	Norway	挪威	2012	D01T02	0.8	0.7	0.1	1.20977	0.042971	1	.	1	.	.	.	.	.	7.66951	102176	13.7403	31.8885	2.8e+10	5.1e+11	73.5713	5.1e+11	101524	5.0e+06	1.1e+11	48.7258	66.1055	1.62087	2.8e+10	68.8	1.78775	37.0134	0.042971	5552.97	555	1009	36.8413	1.12795	5.15669	69.8157	0.124568	0.182727	2.60732	2.15522	1.20977
28	NOR	Norway	挪威	2013	D01T02	1	0.8	0.2	1.17456	0.059551	1	.	1	.	.	.	.	.	7.77688	103554	13.9121	29.1717	-1400000000	5.2e+11	76.5	5.2e+11	102913	5.1e+06	1.2e+11	47.0253	65.9823	1.65238	-1400000000	70.5	1.81934	37.6077	0.059551	5573.83	648	1101	35.6395	1.31531	4.75796	67.6247	0.131241	0.188276	2.55923	2.17889	1.17456
28	NOR	Norway	挪威	2014	D01T02	2.8	1.8	1.1	1.1493	0.074908	1	.	1	.	.	.	.	.	7.61371	97666.7	14.0704	32.2758	3.2e+09	5.0e+11	77.5435	5.0e+11	97019.2	5.1e+06	1.2e+11	46.9768	65.8529	1.71506	3.2e+09	70.9	1.75576	38.4811	0.074908	5685.63	457	1106	34.0317	1.44284	5.32706	64.8781	0.139349	0.188313	2.50151	2.17656	1.1493
28	NOR	Norway	挪威	2015	D01T02	3.6	2	1.6	1.20382	0.096275	1	.	1	.	.	.	.	.	7.61187	74810	14.2079	31.3179	7.3e+09	3.9e+11	77.9589	3.9e+11	74355.5	5.2e+06	9.2e+10	46.744	65.7347	1.93526	7.3e+09	71.8	1.76249	39.5052	0.096275	5890.96	652	1153	31.0104	1.53756	6.07883	57.6867	0.149806	0.187308	2.57018	2.13501	1.20382
28	NOR	Norway	挪威	2016	D01T02	3.8	2	1.8	1.18103	0.093488	1	.	1	.	.	.	.	.	7.40555	70867.4	14.3354	.	-19000000000	3.7e+11	80.5465	3.7e+11	70460.6	5.2e+06	9.3e+10	43.5217	65.604	2.0446	-19000000000	70.8	1.77743	40.2356	0.093488	6077.57	833	1227	27.9416	2.09231	6.23891	52.9735	0.144047	0.186847	2.51306	2.12785	1.18103
28	NOR	Norway	挪威	2017	D01T02	3.1	1.9	1.1	1.14409	0.087461	1	.	1	.	.	.	.	.	7.1474	76131.8	14.4526	.	5.9e+09	4.0e+11	81.9923	4.0e+11	75496.8	5.3e+06	9.8e+10	45.7595	65.4949	2.09919	5.9e+09	74	1.81936	41.0282	0.087461	6350.06	908	1152	29.7913	1.97646	6.54068	57.1859	0.122122	0.190105	2.43016	2.1241	1.14409
28	NOR	Norway	挪威	2018	D01T02	4.1	2.2	2	1.18469	0.109884	1	.	1	.	.	.	.	.	7.07718	82792.8	14.5489	.	-5700000000	4.4e+11	83.0173	4.4e+11	82267.8	5.3e+06	1.1e+11	47.6868	65.4017	2.07264	-5700000000	74.3	1.76457	41.5235	0.109884	6432.6	592	1082	31.7928	1.863	6.18246	62.1231	0.154411	0.212255	2.64942	2.23638	1.18469
29	POL	Poland	波兰	1995	D01T02	0.4	0.2	0.2	1.03589	0.630706	0	.	1	.	.	.	.	.	8.80953	3686.84	126.008	0.117886	3.7e+09	1.4e+11	31.179	1.4e+11	3686.82	3.9e+07	2.5e+10	36.5057	66.0071	0.63662	3.7e+09	50.7	0.771627	.	0.630706	.	1265	2595	33.4817	5.57758	7.26194	8.1771	0.063042	0.094699	2.42751	2.34339	1.03589
29	POL	Poland	波兰	1996	D01T02	0.7	0.4	0.3	1.01214	0.585399	0	.	1	.	.	.	.	.	9.19938	4147.47	126.104	0.12209	4.5e+09	1.6e+11	35.3491	1.6e+11	4147.47	3.9e+07	3.1e+10	38.438	66.3239	0.64037	4.5e+09	57.8	0.79251	.	0.585399	1362.62	1297	2411	32.1528	5.16558	5.83359	6.86771	0.05653	0.113443	2.38179	2.35322	1.01214
29	POL	Poland	波兰	1997	D01T02	0.4	0.3	0.1	1.00208	0.535487	0	.	1	.	.	.	.	.	8.91669	4123.15	126.186	0.127711	4.9e+09	1.6e+11	39.8899	1.6e+11	4123.14	3.9e+07	3.5e+10	42.7089	66.7872	0.64412	4.9e+09	56.8	0.813393	.	0.535487	1442.53	3950	2399	31.4115	4.50207	5.85463	6.68657	0.060146	0.130967	2.3092	2.30441	1.00208
29	POL	Poland	波兰	1998	D01T02	0.9	0.4	0.5	0.971362	0.519996	0	.	1	.	.	.	.	.	8.23553	4518.11	126.232	0.161568	6.4e+09	1.7e+11	39.2011	1.8e+11	4518.11	3.9e+07	4.2e+10	43.0974	67.3421	0.66083	6.4e+09	59.2	0.834275	.	0.519996	1456.77	4128	2407	31.1784	3.87661	4.60311	5.48218	0.068699	0.156496	2.30001	2.36782	0.971362
29	POL	Poland	波兰	1999	D01T02	29.7	15.7	14	0.934147	0.558806	0	.	1	.	.	.	.	.	7.99213	4398.07	126.221	0.156915	7.4e+09	1.7e+11	44.9665	1.7e+11	4398.08	3.9e+07	4.1e+10	43.0757	67.9014	0.6818	7.4e+09	59.6	0.764605	.	0.558806	1463.21	4671	2285	30.2127	3.25278	4.88046	4.97804	0.067671	0.161044	2.22957	2.38674	0.934147
29	POL	Poland	波兰	2000	D01T02	1.7	0.4	1.3	0.898243	0.578678	0	.	1	.	.	.	.	.	7.73092	4501.48	124.91	0.167111	9.3e+09	1.7e+11	49.6746	1.7e+11	4501.45	3.8e+07	4.1e+10	46.9029	68.4184	0.64202	9.3e+09	60	0.694935	.	0.578678	1430.98	4899	2404	28.7932	3.12672	5.00513	5.18696	0.067039	0.177461	2.1639	2.40903	0.898243
29	POL	Poland	波兰	2001	D01T02	33	16.3	16.7	0.871589	0.633407	0	.	1	.	.	.	.	.	7.67692	4991.24	124.875	0.184732	5.7e+09	1.9e+11	54.7617	1.9e+11	4991.24	3.8e+07	3.9e+10	45.1438	68.8676	0.62284	5.7e+09	61.8	0.699103	0.031038	0.633407	1457.27	4328	2202	27.3867	3.25342	4.04519	5.76867	0.065253	0.166228	2.07081	2.37591	0.871589
29	POL	Poland	波兰	2002	D01T02	1.3	0.4	0.9	0.860245	0.668287	0	.	1	.	.	.	.	.	7.5155	5207.13	124.818	0.190393	4.1e+09	2.0e+11	57.8564	2.0e+11	5207.17	3.8e+07	3.7e+10	48.4408	69.2466	0.55785	4.1e+09	65	0.70327	0.314856	0.668287	1473.81	4292	2313	26.6399	2.72576	4.02228	5.05911	0.074041	0.182516	2.09384	2.434	0.860245
29	POL	Poland	波兰	2003	D01T02	1.8	0.4	1.3	0.86698	0.695838	0	.	1	.	.	.	.	.	7.79307	5701.64	124.754	0.15309	5.4e+09	2.2e+11	59.4831	2.2e+11	5701.6	3.8e+07	4.0e+10	56.0233	69.5854	0.53884	5.4e+09	61.8	0.644334	0.506847	0.695838	1524.25	3973	2268	27.4574	2.6098	3.75467	4.37491	0.088262	0.192266	2.11976	2.44499	0.86698
29	POL	Poland	波兰	2004	D01T02	1.5	0.4	1.1	0.896145	0.7196	0	.	1	.	.	.	.	.	7.90562	6681.31	124.644	0.195655	1.4e+10	2.6e+11	61.0569	2.6e+11	6681.39	3.8e+07	4.7e+10	64.5772	69.9362	0.55251	1.4e+10	58.7	0.503533	2.26931	0.7196	1587.1	5359	2381	28.7655	3.2926	4.08915	5.46212	0.083338	0.179744	2.0888	2.33087	0.896145
29	POL	Poland	波兰	2005	D01T02	1.6	0.4	1.1	0.888333	0.860721	0	.	1	.	.	.	.	.	7.89596	8021.55	124.589	0.211845	1.1e+10	3.1e+11	63.5946	3.1e+11	8021.51	3.8e+07	5.8e+10	62.4137	70.3121	0.56282	1.1e+10	59.6	0.560003	2.45013	0.860721	1620.12	4555	2028	28.6373	2.91894	4.02274	5.11885	0.094849	0.190859	2.07613	2.33711	0.888333
29	POL	Poland	波兰	2006	D01T02	13.1	1.9	11.2	0.873087	0.741497	0	.	1	.	.	.	.	.	8.23499	9035.53	124.514	0.206197	2.1e+10	3.4e+11	65.3647	3.5e+11	9035.41	3.8e+07	7.0e+10	68.9941	70.6295	0.55082	2.2e+10	59.3	0.489538	7.55218	0.741497	1553.21	655	2157	28.763	2.69199	5.22903	4.48052	0.0995	0.206361	2.0912	2.39518	0.873087
29	POL	Poland	波兰	2007	D01T02	11.8	2	9.8	0.919826	0.682177	0	.	1	.	.	.	.	.	8.22064	11254.3	124.447	0.247593	2.5e+10	4.3e+11	67.212	4.3e+11	11254.5	3.8e+07	9.6e+10	71.2904	70.9245	0.56189	2.5e+10	58.1	0.574915	10.8354	0.682177	1600.78	361	2392	28.667	3.04554	4.53281	3.80069	0.100512	0.199933	2.18305	2.37333	0.919826
29	POL	Poland	波兰	2008	D01T02	4.9	1.6	3.4	0.878943	0.657364	0	.	1	.	.	.	.	.	8.08706	13995.8	124.472	0.281601	1.5e+10	5.3e+11	70.2271	5.3e+11	13996	3.8e+07	1.2e+11	71.0749	71.1618	0.59921	1.5e+10	60.3	0.696217	11.5845	0.657364	1611.32	290	2488	28.6651	2.59262	3.96215	4.2511	0.104368	0.216111	2.16382	2.46185	0.878943
29	POL	Poland	波兰	2009	D01T02	2.6	1.6	1	0.915803	0.640878	0	.	1	.	.	.	.	.	7.79155	11525.9	124.564	0.329457	1.4e+10	4.4e+11	72.3127	4.4e+11	11526.1	3.8e+07	9.4e+10	65.0302	71.2976	0.66097	1.4e+10	60.3	0.753708	14.5142	0.640878	1593.27	241	2899	29.5082	2.55892	3.6853	3.08375	0.105474	0.193688	2.15751	2.35587	0.915803
29	POL	Poland	波兰	2010	D01T02	3.5	1.8	1.6	0.955306	0.680815	0	.	1	.	.	.	.	.	8.247	12504.3	124.209	0.396985	1.9e+10	4.8e+11	74.7552	4.8e+11	12613	3.8e+07	9.7e+10	70.3937	71.3101	0.7207	1.8e+10	63.2	0.809571	15.1785	0.680815	1683.05	227	3203	29.6752	2.93453	4.69487	4.15472	0.120943	0.194855	2.16128	2.26239	0.955306
29	POL	Poland	波兰	2011	D01T02	5	2.8	2.1	0.975477	0.631199	0	.	1	.	.	.	.	.	8.15993	13776.4	124.296	0.493521	1.8e+10	5.3e+11	74.6585	5.3e+11	13879.6	3.8e+07	1.1e+11	75.5806	71.0621	0.74588	1.9e+10	64.1	0.828642	18.0528	0.631199	1675.06	244	3879	30.4633	3.19675	5.02501	4.90163	0.128259	0.207776	2.25149	2.30809	0.975477
29	POL	Poland	波兰	2012	D01T02	6	3.7	2.2	0.958541	0.800308	0	.	1	.	.	.	.	.	7.96968	13010.8	124.3	0.624528	7.2e+09	5.0e+11	73.9615	5.0e+11	13097.3	3.8e+07	9.9e+10	77.1145	70.7808	0.88086	7.4e+09	64.2	0.865586	17.8318	0.800308	1752.71	247	4410	30.2924	3.00836	4.82898	4.99907	0.13978	0.212479	2.25384	2.35132	0.958541
29	POL	Poland	波兰	2013	D01T02	12.9	5.9	7.1	0.983127	0.867579	0	.	1	.	.	.	.	.	7.84182	13558.3	124.229	0.748832	1.0e+09	5.2e+11	71.8564	5.2e+11	13696.5	3.8e+07	9.9e+10	79.1897	70.4345	0.87053	8.0e+08	66	0.859328	18.2117	0.867579	1873.06	174	4237	28.7348	3.24619	4.18057	4.69901	0.151658	0.202432	2.26991	2.30887	0.983127
29	POL	Poland	波兰	2014	D01T02	23.3	9.7	13.6	0.958865	0.861883	0	.	1	.	.	.	.	.	7.51689	14182	124.144	0.932937	2.0e+10	5.4e+11	68.4472	5.4e+11	14271.3	3.8e+07	1.1e+11	81.7745	69.9849	0.93978	2.0e+10	67	0.884348	18.7494	0.861883	2064.05	155	3941	29.9958	2.99303	4.00955	4.13792	0.155135	0.218653	2.25271	2.34935	0.958865
29	POL	Poland	波兰	2015	D01T02	19.2	9	10.3	0.935759	0.869587	0	.	1	.	.	.	.	.	7.61002	12560.1	124.062	1.14302	1.6e+10	4.8e+11	66.9462	4.8e+11	12578.5	3.8e+07	9.6e+10	82.7935	69.4242	1.00324	1.5e+10	68.6	0.864182	18.8455	0.869587	2171.58	139	4676	31.1152	2.50307	3.60544	3.30872	0.166006	0.225957	2.24022	2.39401	0.935759
29	POL	Poland	波兰	2016	D01T02	26.5	10.1	16.4	0.948811	0.68866	0	.	1	.	.	.	.	.	7.89575	12378.8	124.008	.	1.8e+10	4.7e+11	67.0045	4.7e+11	12447.4	3.8e+07	8.5e+10	85.3358	68.8771	0.96408	1.8e+10	69.3	0.73077	19.0177	0.68866	2320.79	135	4261	30.768	2.64536	3.02516	2.55309	0.154174	0.224217	2.20903	2.32821	0.948811
29	POL	Poland	波兰	2017	D01T02	25.5	10.5	15	0.989818	0.62973	0	.	1	.	.	.	.	.	8.23872	13815.5	124.024	.	1.2e+10	5.3e+11	67.8274	5.3e+11	13864.7	3.8e+07	9.2e+10	88.9208	68.1894	1.03443	1.2e+10	68.3	0.670291	19.8093	0.62973	3019.11	117	3924	28.8624	3.01035	3.18997	2.54767	0.149261	0.210101	2.22018	2.24302	0.989818
29	POL	Poland	波兰	2018	D01T02	52.9	15.8	37.1	0.947724	0.631787	0	.	1	.	.	.	.	.	8.21362	15504.5	124.032	.	1.9e+10	5.9e+11	68.6201	5.9e+11	15468.4	3.8e+07	1.1e+11	90.6571	67.4299	1.20953	1.8e+10	68.5	0.647124	20.3819	0.631787	3106.11	115	4207	28.7573	2.41462	3.0437	2.59802	0.157414	0.238103	2.23147	2.35456	0.947724
30	PRT	Portugal	葡萄牙	1995	D01T02	0.8	0.3	0.5	1.28159	0.351307	1	.	1	.	.	.	.	.	5.05609	11781.4	109.576	3.18444	6.8e+08	1.2e+11	36.2898	1.2e+11	11781.4	1.0e+07	2.8e+10	46.8947	67.2274	0.53526	6.9e+08	62.4	1.3441	.	0.351307	.	120	81	24.8146	4.80044	1.82646	3.19456	0.077358	0.111516	2.256	1.76032	1.28159
30	PRT	Portugal	葡萄牙	1996	D01T02	0.6	0.3	0.3	1.24593	0.336732	1	.	1	.	.	.	.	.	4.84328	12185.1	109.988	5.68398	1.6e+09	1.2e+11	38.7282	1.2e+11	12185.1	1.0e+07	2.9e+10	48.7808	67.3493	0.5495	1.6e+09	64.5	1.32256	.	0.336732	1245.38	76	86	25.4394	4.59075	1.41831	2.41518	0.074258	0.121472	2.26389	1.81703	1.24593
30	PRT	Portugal	葡萄牙	1997	D01T02	0.7	0.4	0.4	1.22205	0.36068	1	.	1	.	.	.	.	.	5.03825	11575.5	110.481	5.12208	2.7e+09	1.2e+11	41.1785	1.2e+11	11575.5	1.0e+07	3.0e+10	50.4288	67.478	0.56374	2.7e+09	63.6	1.30102	.	0.36068	1340.83	101	71	25.7156	3.83106	1.4123	2.30365	0.086192	0.134483	2.28336	1.86846	1.22205
30	PRT	Portugal	葡萄牙	1998	D01T02	0.9	0.4	0.5	1.18072	0.338834	1	.	1	.	.	.	.	.	5.47239	12199.2	111.04	4.39383	6.1e+09	1.2e+11	43.6288	1.2e+11	12199.2	1.0e+07	3.4e+10	51.0124	67.596	0.62486	6.1e+09	65	1.27948	.	0.338834	1438.89	61	96	25.3365	3.54172	1.41301	1.60253	0.083956	0.137784	2.20934	1.87118	1.18072
30	PRT	Portugal	葡萄牙	1999	D01T02	0.8	0.4	0.3	1.15554	0.356203	1	.	1	.	.	.	.	.	6.08814	12475.3	111.67	2.31244	7.4e+08	1.3e+11	44.9166	1.3e+11	12471.1	1.0e+07	3.5e+10	50.6288	67.6761	0.68121	7.4e+08	65.6	1.23636	0.002902	0.356203	1536.06	114	81	24.8681	3.28917	1.49235	1.82905	0.083054	0.140619	2.17726	1.88419	1.15554
30	PRT	Portugal	葡萄牙	2000	D01T02	1.3	0.7	0.7	1.19965	0.422363	1	.	1	.	.	.	.	.	5.9924	11526.4	112.458	3.73912	7.3e+09	1.2e+11	47.8698	1.2e+11	11497.8	1.0e+07	3.3e+10	54.3611	67.7008	0.72156	7.3e+09	65.5	1.19325	0.244199	0.422363	1625.53	65	81	24.4616	3.10975	1.88633	2.55283	0.097742	0.148861	2.27717	1.89819	1.19965
30	PRT	Portugal	葡萄牙	2001	D01T02	2.2	0.8	1.4	1.21655	0.487461	1	.	1	.	.	.	.	.	5.9235	11734.8	113.254	4.48051	6.1e+09	1.2e+11	50.6373	1.2e+11	11724.6	1.0e+07	3.3e+10	52.3445	67.6861	0.76482	6.1e+09	66	1.24933	0.957556	0.487461	1713.99	56	107	24.1439	2.96075	1.78475	1.87641	0.112192	0.15193	2.33905	1.9227	1.21655
30	PRT	Portugal	葡萄牙	2002	D01T02	4.6	1.4	3.2	1.19015	0.494729	1	.	1	.	.	.	.	.	6.29628	12936.7	113.876	2.66018	5.9e+08	1.3e+11	52.9107	1.3e+11	12875.3	1.0e+07	3.5e+10	49.2441	67.6239	0.72183	5.9e+08	65.4	1.30541	2.49826	0.494729	1827.8	49	130	23.497	2.72289	1.64152	1.96287	0.115842	0.15184	2.30153	1.93382	1.19015
30	PRT	Portugal	葡萄牙	2003	D01T02	13.3	3.5	9.9	1.18362	0.515376	1	.	1	.	.	.	.	.	5.78685	15797.8	114.304	5.35734	1.0e+10	1.6e+11	54.8488	1.7e+11	15763	1.0e+07	3.9e+10	47.8927	67.5248	0.69802	1.0e+10	64.9	1.26517	4.79341	0.515376	1940.82	40	125	22.6297	2.65118	1.57532	2.43742	0.120239	0.146395	2.2813	1.92739	1.18362
30	PRT	Portugal	葡萄牙	2004	D01T02	22.4	4.5	17.9	1.15319	0.56926	1	.	1	.	.	.	.	.	5.92614	18064.2	114.578	3.7521	2.5e+09	1.9e+11	55.6527	1.9e+11	18031	1.0e+07	4.4e+10	47.9992	67.4266	0.7293	2.5e+09	64.9	1.18168	7.98333	0.56926	1975.39	64	123	22.237	2.60214	1.85965	2.39442	0.120019	0.152108	2.2524	1.9532	1.15319
30	PRT	Portugal	葡萄牙	2005	D01T02	13	2.4	10.5	1.1199	0.622194	1	.	1	.	.	.	.	.	6.23362	18780.1	114.828	2.34078	3.4e+09	2.0e+11	55.4318	2.0e+11	18773.1	1.1e+07	4.6e+10	52.0635	67.3597	0.75755	3.4e+09	62.4	1.1817	11.0748	0.622194	2010.4	47	158	21.3833	2.30349	2.82013	4.06601	0.120401	0.165352	2.2493	2.00849	1.1199
30	PRT	Portugal	葡萄牙	2006	D01T02	17.8	3	14.8	1.11527	0.567457	1	.	1	.	.	.	.	.	5.74476	19839.5	115.035	4.91964	1.3e+10	2.1e+11	55.3979	2.1e+11	19822.8	1.1e+07	4.7e+10	55.3423	67.0796	0.95448	1.3e+10	62.9	1.02142	13.5024	0.567457	2338.18	36	184	21.1477	2.25314	3.82483	5.29461	0.121229	0.162302	2.21881	1.98948	1.11527
30	PRT	Portugal	葡萄牙	2007	D01T02	16.6	2.7	13.8	1.05533	0.59673	1	.	1	.	.	.	.	.	5.57695	22811.1	115.261	5.31796	6.0e+09	2.4e+11	57.7947	2.4e+11	22782.1	1.1e+07	5.4e+10	56.0434	66.86	1.12417	6.0e+09	64	1.01476	14.4531	0.59673	2664.85	31	250	21.1534	1.99816	3.72775	4.50289	0.122441	0.18286	2.24484	2.12715	1.05533
30	PRT	Portugal	葡萄牙	2008	D01T02	12.2	2.8	9.4	1.02828	0.618623	1	.	1	.	.	.	.	.	5.38392	24949	115.428	4.99397	7.8e+09	2.6e+11	61.6109	2.6e+11	24847.5	1.1e+07	6.0e+10	57.7686	66.691	1.44335	7.8e+09	63.9	1.0778	15.4563	0.618623	3813.76	24	381	20.3863	1.96377	3.20474	5.55294	0.124215	0.195862	2.26235	2.20013	1.02828
30	PRT	Portugal	葡萄牙	2009	D01T02	31.8	7.9	24	1.05304	0.548957	1	.	1	.	.	.	.	.	5.32724	23151.2	115.386	5.81182	5.6e+09	2.4e+11	62.6416	2.4e+11	23059.8	1.1e+07	5.2e+10	47.5475	66.538	1.58001	5.6e+09	64.9	1.0369	18.0508	0.548957	3756.5	46	571	19.8572	1.95063	2.89607	4.85933	0.113424	0.178139	2.24329	2.13029	1.05304
30	PRT	Portugal	葡萄牙	2010	D01T02	15.6	5.4	10.2	1.0219	0.574451	1	.	1	.	.	.	.	.	4.81763	22520.6	115.439	9.09838	9.0e+09	2.4e+11	65.6021	2.4e+11	22498.7	1.1e+07	4.9e+10	53.4532	66.3701	1.53529	9.0e+09	64.4	0.950319	20.0851	0.574451	3918.76	46	499	19.9501	1.93708	3.50667	6.40958	0.131862	0.202709	2.20475	2.15751	1.0219
30	PRT	Portugal	葡萄牙	2011	D01T02	14.3	4.8	9.5	0.99564	0.526209	1	.	1	.	.	.	.	.	4.72343	23217.3	115.27	7.86978	9.8e+09	2.4e+11	68.429	2.5e+11	23186.9	1.1e+07	4.5e+10	58.2168	66.1579	1.45741	9.8e+09	64	0.926606	21.2312	0.526209	4168.27	75	571	19.345	1.83402	3.20271	7.17047	0.148568	0.230442	2.26547	2.27539	0.99564
30	PRT	Portugal	葡萄牙	2012	D01T02	14.2	5.2	9	1.00578	0.563347	1	.	1	.	.	.	.	.	4.58593	20563.7	114.803	7.18865	2.1e+10	2.2e+11	68.5103	2.2e+11	20564.9	1.1e+07	3.4e+10	60.3593	65.9295	1.37861	2.1e+10	63	0.948586	22.7215	0.563347	4037.33	26	621	19.1135	1.92411	2.83059	8.31756	0.15746	0.230778	2.29822	2.28501	1.00578
30	PRT	Portugal	葡萄牙	2013	D01T02	16.5	6.2	10.2	1.02944	0.557446	1	.	1	.	.	.	.	.	4.45194	21653.2	114.156	10.014	1.6e+10	2.3e+11	66.1367	2.3e+11	21647	1.0e+07	3.3e+10	61.2017	65.6795	1.32468	1.6e+10	63.1	0.976644	24.4957	0.557446	3610.55	22	647	18.8679	2.09548	2.32363	10.4069	0.160045	0.218006	2.25189	2.1875	1.02944
30	PRT	Portugal	葡萄牙	2014	D01T02	19.9	10.3	9.5	1.01873	0.612901	1	.	1	.	.	.	.	.	4.416	22103.7	113.542	10.7046	1.2e+10	2.3e+11	65.5036	2.3e+11	22074.3	1.0e+07	3.5e+10	61.944	65.4166	1.28992	1.2e+10	63.5	0.95624	27.4565	0.612901	3662.38	18	722	18.9368	2.07611	2.25221	8.35936	0.163534	0.218886	2.22963	2.18864	1.01873
30	PRT	Portugal	葡萄牙	2015	D01T02	18.4	11.4	7	1.03244	0.635912	1	.	1	.	.	.	.	.	4.81285	19250.1	113.073	8.04425	1.3e+09	2.0e+11	61.7563	2.0e+11	19242.4	1.0e+07	3.1e+10	61.1904	65.1513	1.2433	1.3e+09	65.3	1.05584	30.3141	0.635912	3729.77	20	925	19.4644	2.09944	2.15814	7.65644	0.166611	0.209808	2.22309	2.15324	1.03244
30	PRT	Portugal	葡萄牙	2016	D01T02	23.3	12.4	10.9	1.03027	0.646815	1	.	1	.	.	.	.	.	4.72206	19992	112.716	.	7.4e+09	2.1e+11	63.2557	2.1e+11	19978.4	1.0e+07	3.2e+10	59.784	64.9615	1.28075	7.4e+09	65.1	1.03466	32.6689	0.646815	4004.58	27	724	19.328	2.06581	2.00765	6.24744	0.166328	0.207029	2.18831	2.12402	1.03027
30	PRT	Portugal	葡萄牙	2017	D01T02	22.2	14.4	7.8	1.03449	0.651109	1	.	1	.	.	.	.	.	5.17762	21490.4	112.442	.	1.1e+10	2.2e+11	63.9358	2.2e+11	21437.3	1.0e+07	3.7e+10	63.807	64.7752	1.31928	1.1e+10	62.6	1.09548	34.6799	0.651109	4367.73	36	644	19.1173	2.09587	2.25282	7.16639	0.169605	0.2105	2.20415	2.13066	1.03449
30	PRT	Portugal	葡萄牙	2018	D01T02	24.4	16.1	8.3	1.0601	0.701088	1	.	1	.	.	.	.	.	4.81383	23562.6	112.262	.	7.8e+09	2.4e+11	65.6627	2.4e+11	23551	1.0e+07	4.2e+10	64.9977	64.5882	1.34753	7.9e+09	63.4	1.07239	36.7808	0.701088	4646.13	29	661	19.2993	2.03653	2.43485	6.89397	0.185483	0.216596	2.25102	2.12341	1.0601
31	SVK	Slovak Republic	斯洛伐克	1995	D01T02	0.1	0	0	0.844905	1.23512	1	.	1	.	.	.	.	.	7.90202	4819.13	111.476	18.7093	2.4e+08	2.6e+10	18.5509	2.6e+10	4819.13	5.4e+06	6.7e+09	67.1436	66.4874	0.72818	2.4e+08	60.4	0.486923	.	1.23512	.	1400	269	27.74	2.25484	3.6203	4.24663	0.207594	0.327568	2.42434	2.86936	0.844905
31	SVK	Slovak Republic	斯洛伐克	1996	D01T02	0.1	0	0	0.833798	0.793138	1	.	1	.	.	.	.	.	7.84874	5196.94	111.712	18.0716	3.5e+08	2.8e+10	20.0897	2.8e+10	5196.94	5.4e+06	9.2e+09	71.4592	66.921	0.88963	3.5e+08	57.6	0.505495	.	0.793138	1858.94	1498	195	28.5969	2.30028	5.23854	5.54946	0.150731	0.341268	2.38174	2.85649	0.833798
31	SVK	Slovak Republic	斯洛伐克	1997	D01T02	0	0	0	0.838002	0.7901	1	.	1	.	.	.	.	.	7.85272	5146.67	111.919	17.7054	1.8e+08	2.8e+10	21.8217	2.8e+10	5146.67	5.4e+06	9.7e+09	77.0951	67.3909	1.05108	1.8e+08	55.5	0.524066	.	0.7901	1853.57	1578	224	27.0938	2.06755	4.38629	4.61413	0.168385	0.338841	2.43004	2.8998	0.838002
31	SVK	Slovak Republic	斯洛伐克	1998	D01T02	0	0	0	0.840141	0.74544	1	.	1	.	.	.	.	.	7.6808	5538.62	112.069	18.6209	6.5e+08	3.0e+10	24.2218	3.0e+10	5538.62	5.4e+06	1.1e+10	79.7227	67.8931	0.76541	6.5e+08	57.5	0.542638	.	0.74544	1880.36	1612	213	27.9728	2.12467	3.70219	3.50385	0.139079	0.300423	2.37989	2.83272	0.840141
31	SVK	Slovak Republic	斯洛伐克	1999	D01T02	0.1	0	0	0.774372	0.699559	1	.	1	.	.	.	.	.	7.5352	5645.58	112.183	21.1288	3.4e+08	3.0e+10	25.9236	3.1e+10	5643.68	5.4e+06	9.4e+09	70.6949	68.4295	0.64475	3.4e+08	54.2	0.54224	.	0.699559	1705.17	1683	213	28.3665	1.64411	3.45761	4.75308	0.128361	0.298113	2.23659	2.88826	0.774372
31	SVK	Slovak Republic	斯洛伐克	2000	D01T02	0.2	0	0.2	0.834955	0.565053	1	.	1	.	.	.	.	.	7.06517	5426.62	112.032	25.8248	2.2e+09	2.9e+10	28.4118	2.9e+10	5413.15	5.4e+06	7.6e+09	84.3059	68.995	0.63806	2.2e+09	53.8	0.541842	.	0.565053	1843.79	1804	236	29.4169	1.71031	3.42852	6.99871	0.144251	0.279753	2.35986	2.82633	0.834955
31	SVK	Slovak Republic	斯洛伐克	2001	D01T02	0.2	0	0.2	0.876386	0.530411	1	.	1	.	.	.	.	.	7.17196	5722.17	111.827	26.0144	1.5e+09	3.1e+10	30.0636	3.1e+10	5717.22	5.4e+06	8.9e+09	88.9531	69.5632	0.62465	1.5e+09	58.5	0.586485	.	0.530411	1775	1696	246	29.8465	2.12022	3.4649	6.59093	0.146139	0.262414	2.22093	2.53419	0.876386
31	SVK	Slovak Republic	斯洛伐克	2002	D01T02	0.4	0.2	0.2	0.870826	0.508953	1	.	1	.	.	.	.	.	7.07942	6564.7	111.786	26.9773	4.2e+09	3.5e+10	32.0803	3.5e+10	6533.55	5.4e+06	9.7e+09	88.1546	70.1012	0.56314	4.2e+09	59.8	0.631129	0.07596	0.508953	1700.15	1599	259	29.2403	2.0429	3.08983	6.05884	0.145418	0.264948	2.19761	2.52359	0.870826
31	SVK	Slovak Republic	斯洛伐克	2003	D01T02	0.4	0.2	0.2	0.854487	0.431805	1	.	1	.	.	.	.	.	7.13354	8731.94	111.689	26.4769	9.7e+08	4.7e+10	33.8885	4.7e+10	8712.7	5.4e+06	1.1e+10	94.7527	70.6109	0.56146	9.7e+08	59	0.704517	0.417928	0.431805	1782.83	1437	210	30.5822	1.81038	2.42644	5.1941	0.147055	0.253537	2.13373	2.49709	0.854487
31	SVK	Slovak Republic	斯洛伐克	2004	D01T02	0.2	0.1	0.1	0.862417	0.598117	1	.	1	.	.	.	.	.	6.96734	10691.4	111.69	26.0554	4.1e+09	5.7e+10	35.9815	5.7e+10	10671.8	5.4e+06	1.4e+10	100.48	71.0942	0.50069	4.1e+09	64.6	0.744909	1.4654	0.598117	1985.01	238	215	32.0426	1.66748	2.8745	6.40911	0.188792	0.281889	2.09097	2.42455	0.862417
31	SVK	Slovak Republic	斯洛伐克	2005	D01T02	0.2	0.1	0.1	0.858263	0.790858	1	.	1	.	.	.	.	.	7.16912	11690.1	111.701	26.4231	3.9e+09	6.3e+10	40.3534	6.3e+10	11685.8	5.4e+06	1.7e+10	105.639	71.5399	0.49332	3.9e+09	66.8	0.820216	3.37667	0.790858	2022.72	95	155	31.927	1.61879	2.54483	5.8743	0.219347	0.300427	2.07753	2.42062	0.858263
31	SVK	Slovak Republic	斯洛伐克	2006	D01T02	7.9	1.1	6.8	0.89732	0.803701	1	.	1	.	.	.	.	.	7.04875	13170.8	111.706	27.093	5.7e+09	7.1e+10	44.778	7.1e+10	13159.8	5.4e+06	1.8e+10	123.139	71.7925	0.47488	5.7e+09	69.8	0.783087	5.6649	0.803701	2181.26	90	193	34.2862	1.8483	3.62703	5.45264	0.237937	0.301052	2.11002	2.35147	0.89732
31	SVK	Slovak Republic	斯洛伐克	2007	D01T02	14.3	1.9	12.3	0.937747	0.7527	1	.	1	.	.	.	.	.	6.91961	16106.1	111.739	24.6306	5.1e+09	8.6e+10	50.1877	8.7e+10	16085.6	5.4e+06	2.2e+10	138.226	72.0017	0.44746	5.1e+09	69.6	0.763171	10.1641	0.7527	2288.37	106	239	33.5447	2.296	2.78074	4.46473	0.226735	0.266186	2.07128	2.20879	0.937747
31	SVK	Slovak Republic	斯洛伐克	2008	D01T02	69.7	11.1	58.6	1.01564	0.733356	1	.	1	.	.	.	.	.	6.89637	18753.6	111.834	25.7673	4.6e+09	1.0e+11	53.7513	1.0e+11	18677.3	5.4e+06	2.5e+10	144.542	72.1516	0.46137	4.6e+09	70	0.824808	11.2361	0.733356	2331.25	75	167	33.0566	2.5332	2.4443	5.03913	0.233562	0.245583	2.1611	2.12782	1.01564
31	SVK	Slovak Republic	斯洛伐克	2009	D01T02	38.5	8.8	29.7	1.01708	0.997823	1	.	1	.	.	.	.	.	6.29527	16597.2	112.007	24.414	1.5e+09	8.9e+10	56.0468	8.9e+10	16531.7	5.4e+06	1.9e+10	125.797	72.2245	0.47272	1.5e+09	69.4	0.754079	14.3824	0.997823	2460.59	63	176	29.4367	2.08513	2.34998	4.59005	0.260088	0.209411	2.19771	2.16081	1.01708
31	SVK	Slovak Republic	斯洛伐克	2010	D01T02	20.3	6.6	13.7	0.997008	0.913259	1	.	1	.	.	.	.	.	6.57195	16908.8	112.109	24.0366	2.1e+09	9.0e+10	57.0667	9.0e+10	16750.8	5.4e+06	1.9e+10	146.795	72.2126	0.61147	2.1e+09	69.7	0.778049	16.2506	0.913259	2809.4	48	234	30.6191	1.56838	3.06339	5.32107	0.298394	0.265544	2.29393	2.30082	0.997008
31	SVK	Slovak Republic	斯洛伐克	2011	D01T02	25.1	7.2	17.9	1.08006	1.02699	1	.	1	.	.	.	.	.	6.31984	18509.7	112.261	25.5505	5.4e+09	9.9e+10	56.2475	9.9e+10	18361.6	5.4e+06	2.3e+10	161.338	72.0191	0.65779	5.4e+09	69.5	0.776676	17.6412	1.02699	2833.44	33	224	30.4842	1.88144	3.09129	6.34276	0.341306	0.262463	2.32249	2.15032	1.08006
31	SVK	Slovak Republic	斯洛伐克	2012	D01T02	24.7	6.1	18.6	1.09123	1.16276	1	.	1	.	.	.	.	.	5.98181	17498.4	112.452	26.8506	1.8e+09	9.5e+10	56.14	9.5e+10	17481.9	5.4e+06	1.9e+10	167.308	71.7999	0.7964	1.8e+09	67	0.75562	19.3277	1.16276	2820.17	35	168	30.8207	1.90186	3.0919	5.93405	0.367731	0.281039	2.33702	2.14164	1.09123
31	SVK	Slovak Republic	斯洛伐克	2013	D01T02	17.9	5.2	12.8	1.19496	1.04242	1	.	1	.	.	.	.	.	6.08129	18276	112.573	27.1643	1.0e+09	9.9e+10	54.3605	9.9e+10	18260	5.4e+06	2.0e+10	169.568	71.5234	0.82157	1.0e+09	68.7	0.727337	20.4822	1.04242	2716.37	26	184	28.6486	2.22231	2.21887	5.49863	0.346432	0.217329	2.35769	1.97303	1.19496
31	SVK	Slovak Republic	斯洛伐克	2014	D01T02	21.9	8.1	13.7	1.27014	0.869331	1	.	1	.	.	.	.	.	5.61729	18720	112.701	28.2979	-360000000	1.0e+11	52.6848	1.0e+11	18674.3	5.4e+06	2.1e+10	165.803	71.1572	0.87814	-360000000	66.4	0.737248	21.9799	0.869331	2715.55	23	211	30.5234	2.74875	2.2557	4.49661	0.289773	0.178372	2.36514	1.86211	1.27014
31	SVK	Slovak Republic	斯洛伐克	2015	D01T02	18.8	8	10.8	1.13736	0.850034	1	.	1	.	.	.	.	.	5.67014	16390.9	112.803	27.4678	1.5e+09	8.8e+10	50.7	8.9e+10	16311	5.4e+06	2.1e+10	167.274	70.6951	1.1626	1.5e+09	67.2	0.691339	23.4828	0.850034	2650.21	28	228	30.5719	2.19588	2.07702	3.56775	0.283857	0.21526	2.33185	2.05024	1.13736
31	SVK	Slovak Republic	斯洛伐克	2016	D01T02	10.1	6.1	4	1.20848	0.704087	1	.	1	.	.	.	.	.	5.80038	16563.4	112.953	.	4.7e+09	9.0e+10	47.7959	9.0e+10	16508.7	5.4e+06	1.9e+10	169.248	70.1908	0.79078	4.7e+09	66.6	0.723503	24.6086	0.704087	2599.96	15	220	29.3416	2.24238	1.73795	2.73718	0.291341	0.205962	2.45981	2.03546	1.20848
31	SVK	Slovak Republic	斯洛伐克	2017	D01T02	11.8	6.1	5.6	1.1392	0.668855	1	.	1	.	.	.	.	.	6.17348	17585.2	113.129	.	4.2e+09	9.5e+10	46.6344	9.5e+10	17504.2	5.4e+06	2.0e+10	173.335	69.5813	0.88612	4.2e+09	65.7	0.710868	25.8414	0.668855	2794.84	23	183	28.724	2.09037	2.09478	3.34004	0.287131	0.222755	2.39827	2.10521	1.1392
31	SVK	Slovak Republic	斯洛伐克	2018	D01T02	16.9	7.3	9.6	1.14742	0.701051	1	.	1	.	.	.	.	.	6.05924	19486.4	113.286	.	2.3e+09	1.1e+11	45.3672	1.1e+11	19364.6	5.4e+06	2.2e+10	176.656	68.9246	0.83806	2.3e+09	65.3	0.673152	27.6775	0.701051	2995.96	14	217	29.3041	2.14505	2.05889	3.01755	0.29212	0.221195	2.3667	2.06263	1.14742
32	SVN	Slovenia	斯洛文尼亚	1995	D01T02	0	0	0	1.05071	0.521283	1	.	1	.	.	.	.	.	7.27182	10730.5	98.802	23.8598	1.5e+08	2.1e+10	30.3988	2.1e+10	10730.5	2.0e+06	4.9e+09	83.4011	69.4957	1.28303	1.5e+08	45.2	1.11922	.	0.521283	.	116	314	29.6081	4.02977	3.40444	1.18893	0.114359	0.179356	2.12941	2.02663	1.05071
32	SVN	Slovenia	斯洛文尼亚	1996	D01T02	0.1	0.1	0	0.966793	0.518106	1	.	1	.	.	.	.	.	7.68872	10815.1	98.7402	22.7816	1.7e+08	2.2e+10	33.5262	2.2e+10	10815.1	2.0e+06	5.1e+09	82.4606	69.6802	1.26473	1.7e+08	50.4	1.12443	.	0.518106	2257.41	201	288	30.0671	3.75327	3.34182	0.930158	0.105506	0.194483	2.03628	2.10623	0.966793
32	SVN	Slovenia	斯洛文尼亚	1997	D01T02	0.1	0	0.1	1.04994	0.489838	1	.	1	.	.	.	.	.	7.9184	10455	98.6075	22.9191	3.3e+08	2.1e+10	36.7677	2.1e+10	10455	2.0e+06	5.2e+09	85.387	69.801	1.24643	3.4e+08	55.6	1.12964	.	0.489838	2023.69	238	266	30.828	3.75289	3.98384	1.20791	0.114901	0.183547	2.1424	2.0405	1.04994
32	SVN	Slovenia	斯洛文尼亚	1998	D01T02	0	0	0	1.05971	0.484227	1	.	1	.	.	.	.	.	7.82341	11175.8	98.3927	23.7597	2.2e+08	2.2e+10	45.8693	2.2e+10	11175.8	2.0e+06	5.8e+09	86.5068	69.8851	1.30515	2.2e+08	60.7	1.13485	.	0.484227	2156.1	127	288	31.1817	3.57936	3.70684	0.977534	0.114905	0.177379	2.1153	1.99611	1.05971
32	SVN	Slovenia	斯洛文尼亚	1999	D01T02	0.1	0	0.1	1.01574	0.473478	1	.	1	.	.	.	.	.	7.51874	11452.8	98.463	22.9503	1.1e+08	2.3e+10	52.4399	2.3e+10	11452.8	2.0e+06	6.3e+09	82.1702	69.9826	1.33688	1.1e+08	61.3	1.01396	.	0.473478	2227.27	138	261	31.0161	2.99226	3.75622	0.600336	0.104865	0.178823	2.02925	1.9978	1.01574
32	SVN	Slovenia	斯洛文尼亚	2000	D01T02	0.4	0.1	0.3	1.0064	0.518572	1	.	1	.	.	.	.	.	7.31134	10201.3	98.755	23.3405	1.4e+08	2.0e+10	55.2122	2.0e+10	10201.3	2.0e+06	5.6e+09	93.2348	70.1168	1.35982	1.4e+08	58.3	0.893072	.	0.518572	2181.4	124	307	30.4679	3.08556	4.17324	0.652972	0.11317	0.185583	2.01106	1.99826	1.0064
32	SVN	Slovenia	斯洛文尼亚	2001	D01T02	0.2	0.1	0.1	1.03196	0.416413	1	.	1	.	.	.	.	.	7.7207	10479.8	98.9106	24.0392	5.0e+08	2.1e+10	60.4427	2.1e+10	10479.8	2.0e+06	5.5e+09	93.0576	70.1991	1.46767	5.0e+08	61.8	0.949341	0.277429	0.416413	2263.19	107	301	30.5506	2.78807	4.28876	0.952505	0.117188	0.187885	2.08707	2.02243	1.03196
32	SVN	Slovenia	斯洛文尼亚	2002	D01T02	0.1	0.1	0.1	1.07163	0.389622	1	.	1	.	.	.	.	.	7.78359	11777.2	99.0333	24.4677	1.8e+09	2.3e+10	66.2898	2.4e+10	11777.2	2.0e+06	5.8e+09	90.7199	70.3307	1.44325	1.9e+09	57.8	1.00561	2.85996	0.389622	2335.87	101	300	29.9671	2.9792	3.77905	1.08355	0.113449	0.165465	2.0699	1.93155	1.07163
32	SVN	Slovenia	斯洛文尼亚	2003	D01T02	0.1	0.1	0.1	0.98764	0.355012	1	.	1	.	.	.	.	.	7.72298	14849	99.093	22.8807	5.4e+08	3.0e+10	68.9881	3.0e+10	14849	2.0e+06	7.4e+09	89.7967	70.4698	1.24792	5.4e+08	57.7	1.0316	2.91503	0.355012	1899.03	60	310	30.2467	2.25207	3.78113	1.35327	0.112079	0.193792	2.05235	2.07803	0.98764
32	SVN	Slovenia	斯洛文尼亚	2004	D01T02	0.1	0.1	0.1	0.930935	0.399346	1	.	1	.	.	.	.	.	7.86155	17233.1	99.1565	24.0556	7.6e+08	3.4e+10	72.3691	3.4e+10	17233.1	2.0e+06	9.0e+09	99.1434	70.5496	1.37026	7.6e+08	59.2	0.988552	5.7629	0.399346	2024.9	42	342	30.2549	2.42963	4.22242	1.59552	0.103845	0.193533	1.89419	2.03472	0.930935
32	SVN	Slovenia	斯洛文尼亚	2005	D01T02	0.2	0.1	0.1	0.979569	0.571021	1	.	1	.	.	.	.	.	7.95636	18098.9	99.3284	24.5162	9.7e+08	3.6e+10	79.2476	3.6e+10	18098.9	2.0e+06	9.6e+09	109.332	70.5287	1.41778	9.7e+08	59.6	0.960934	9.80907	0.571021	2633.11	29	344	29.7905	2.4252	4.78222	2.08258	0.133718	0.195933	1.95381	1.99456	0.979569
32	SVN	Slovenia	斯洛文尼亚	2006	D01T02	0.4	0.2	0.2	0.978935	0.544939	1	.	1	.	.	.	.	.	8.11897	19673	99.6459	23.4799	6.9e+08	3.9e+10	82.5785	4.0e+10	19673	2.0e+06	1.1e+10	119.984	70.434	1.53705	6.9e+08	61.9	0.976326	13.8964	0.544939	2924.95	12	287	30.1219	2.11915	5.92423	2.68558	0.152866	0.211628	2.00095	2.044	0.978935
32	SVN	Slovenia	斯洛文尼亚	2007	D01T02	0.7	0.3	0.4	0.95091	0.555812	1	.	1	.	.	.	.	.	8.06859	23817.9	100.205	23.7123	1.9e+09	4.8e+10	84.5739	4.8e+10	23787.6	2.0e+06	1.4e+10	128.443	70.2203	1.42703	1.9e+09	59.6	0.971651	17.036	0.555812	3106.18	15	331	30.6537	2.04807	5.53924	1.93256	0.167575	0.2261	2.0112	2.11502	0.95091
32	SVN	Slovenia	斯洛文尼亚	2008	D01T02	1.4	0.5	0.9	0.912363	0.655978	1	.	1	.	.	.	.	.	8.58851	27595.6	100.332	24.6552	1.1e+09	5.6e+10	85.5155	5.6e+10	27483.3	2.0e+06	1.6e+10	128.099	69.9228	1.62673	1.1e+09	60.2	1.02971	20.9089	0.655978	3475.94	6	301	29.7883	1.82791	4.52088	3.005	0.188343	0.258036	2.0101	2.20318	0.912363
32	SVN	Slovenia	斯洛文尼亚	2009	D01T02	0.4	0.2	0.1	0.869903	0.538421	1	.	1	.	.	.	.	.	7.60378	24792.1	101.245	25.2037	-350000000	5.0e+10	86.4424	5.0e+10	24694.2	2.0e+06	1.2e+10	104.598	69.6103	1.81184	-350000000	62.9	1.03238	21.9513	0.538421	3661.12	12	373	27.3738	1.81591	3.61373	3.24575	0.144178	0.223894	1.85493	2.13234	0.869903
32	SVN	Slovenia	斯洛文尼亚	2010	D01T02	0.9	0.5	0.4	0.86144	0.722676	1	.	1	.	.	.	.	.	7.70152	23532.5	101.686	24.6566	3.2e+08	4.8e+10	89.1532	4.8e+10	23509.5	2.0e+06	1.0e+10	123.116	69.3205	2.05133	3.2e+08	64.7	0.939019	22.8712	0.722676	3769.81	11	442	26.5061	1.89386	4.75515	4.23078	0.168088	0.230823	1.81348	2.10517	0.86144
32	SVN	Slovenia	斯洛文尼亚	2011	D01T02	1.5	0.6	0.9	0.860037	0.741615	1	.	1	.	.	.	.	.	7.64832	25128	101.898	26.1957	8.8e+08	5.2e+10	86.0175	5.2e+10	25095.1	2.1e+06	1.0e+10	136.293	68.91	2.41297	8.8e+08	64.6	0.952426	23.9353	0.741615	4277.31	11	470	26.8088	2.14261	4.85706	5.73634	0.177951	0.232273	1.78281	2.07295	0.860037
32	SVN	Slovenia	斯洛文尼亚	2012	D01T02	1.3	0.6	0.7	0.857906	0.652614	1	.	1	.	.	.	.	.	7.35169	22641.8	102.114	25.3116	3.4e+07	4.7e+10	87.018	4.7e+10	22643.1	2.1e+06	8.9e+09	137.822	68.5709	2.56061	3.4e+07	62.9	0.908654	24.6133	0.652614	4317.18	.	.	27.3946	1.96351	4.71471	6.44556	0.175552	0.239434	1.84072	2.1456	0.857906
32	SVN	Slovenia	斯洛文尼亚	2013	D01T02	3.9	1.2	2.7	0.854935	0.722532	1	.	1	.	.	.	.	.	7.06235	23503.3	102.282	25.9098	1.0e+08	4.8e+10	85.2881	4.8e+10	23496.6	2.1e+06	9.5e+09	139.234	68.2404	2.56487	1.0e+08	61.7	0.876262	25.315	0.722532	4220.33	.	.	27.489	1.97123	4.47652	6.64007	0.186887	0.244153	1.83629	2.14787	0.854935
32	SVN	Slovenia	斯洛文尼亚	2014	D01T02	5.2	1.9	3.3	0.901129	0.740438	1	.	1	.	.	.	.	.	6.35928	24247.2	102.382	31.8626	1.0e+09	5.0e+10	82.2311	5.0e+10	24214.9	2.1e+06	9.5e+09	139.974	67.8337	2.36548	1.0e+09	62.7	0.88616	26.7873	0.740438	4147.06	.	.	28.1368	2.0171	4.29552	6.13707	0.189953	0.232841	1.90449	2.11345	0.901129
32	SVN	Slovenia	斯洛文尼亚	2015	D01T02	4.7	1.9	2.8	0.938088	0.798512	1	.	1	.	.	.	.	.	6.36758	20890.2	102.446	28.2258	1.7e+09	4.3e+10	80.261	4.3e+10	20881.8	2.1e+06	8.0e+09	143.29	67.3168	2.19565	1.7e+09	60.3	0.881093	27.3457	0.798512	3814.22	.	.	28.0268	2.0966	4.47843	5.30513	0.210638	0.221636	1.93468	2.06237	0.938088
32	SVN	Slovenia	斯洛文尼亚	2016	D01T02	5.4	2	3.4	0.986512	0.867317	1	.	1	.	.	.	.	.	6.73255	21678.4	102.524	.	1.4e+09	4.5e+10	77.8491	4.5e+10	21663.6	2.1e+06	7.8e+09	141.84	66.7403	2.01145	1.5e+09	60.6	0.945633	28.1971	0.867317	3914.26	.	.	27.9657	1.98017	4.06287	4.51021	0.243582	0.221898	2.01112	2.03862	0.986512
32	SVN	Slovenia	斯洛文尼亚	2017	D01T02	10.4	2.7	7.7	0.992611	0.894877	1	.	1	.	.	.	.	.	6.83497	23514	102.611	.	1.2e+09	4.8e+10	78.589	4.9e+10	23455.9	2.1e+06	8.9e+09	153.75	66.0745	1.86635	1.2e+09	59.2	0.910701	28.6801	0.894877	4479.4	.	.	28.3425	1.83972	4.09264	4.90399	0.269796	0.239675	2.05855	2.07387	0.992611
32	SVN	Slovenia	斯洛文尼亚	2018	D01T02	10.6	3.1	7.5	0.998167	0.887144	1	.	1	.	.	.	.	.	6.78574	26123.7	102.992	.	1.5e+09	5.4e+10	77.1131	5.4e+10	26104.1	2.1e+06	1.0e+10	159.718	65.3713	1.95039	1.5e+09	64.8	0.941888	29.0963	0.887144	4845.42	23	255	28.3031	2.24537	4.28227	5.20933	0.238246	0.220164	1.97546	1.97909	0.998167
33	ESP	Spain	西班牙	1995	D01T02	3.5	1.9	1.6	1.13962	1.77683	1	.	1	.	.	.	.	.	6.05596	15472	79.5372	16.1109	8.3e+09	6.1e+11	45.729	6.2e+11	15472	4.0e+07	1.4e+11	34.3936	68.2259	0.79725	8.3e+09	62.8	1.12584	.	1.77683	.	553	2047	28.3344	3.8846	2.36115	1.74529	0.120011	0.107663	2.15258	1.88885	1.13962
33	ESP	Spain	西班牙	1996	D01T02	0.9	0.5	0.4	1.18033	1.84106	1	.	1	.	.	.	.	.	5.76872	16109.1	79.8692	17.8179	9.8e+09	6.4e+11	47.6778	6.4e+11	16109.1	4.0e+07	1.4e+11	35.5537	68.3828	0.78753	9.8e+09	59.6	1.14427	.	1.84106	1293.77	524	2274	28.0791	4.38898	2.33812	2.4727	0.120533	0.09749	2.1533	1.82432	1.18033
33	ESP	Spain	西班牙	1997	D01T02	4	2.4	1.7	1.21009	1.80887	1	.	1	.	.	.	.	.	6.20617	14730.8	80.2046	16.1702	9.4e+09	5.9e+11	50.5477	5.9e+11	14730.8	4.0e+07	1.3e+11	36.6776	68.4877	0.77781	9.4e+09	59.6	1.1627	.	1.80887	1345.89	496	2237	28.0647	4.30221	2.54248	2.50584	0.139416	0.101368	2.17832	1.80012	1.21009
33	ESP	Spain	西班牙	1998	D01T02	1.1	0.7	0.4	1.22485	1.81519	1	.	1	.	.	.	.	.	6.36979	15394.4	80.5372	16.2923	1.6e+10	6.2e+11	52.8337	6.2e+11	15394.4	4.0e+07	1.4e+11	40.1533	68.547	0.84804	1.6e+10	62.6	1.18113	.	1.81519	1499.17	476	2271	27.8475	4.15041	2.13346	2.06352	0.1417	0.101808	2.19154	1.78923	1.22485
33	ESP	Spain	西班牙	1999	D01T02	4.7	2.5	2.1	1.20101	1.80493	1	.	1	.	.	.	.	.	6.89086	15720.6	80.8643	14.9144	2.0e+10	6.3e+11	55.0277	6.4e+11	15715.3	4.0e+07	1.6e+11	37.7787	68.5808	0.83854	2.0e+10	65.1	1.22408	.	1.80493	1521.91	506	2439	27.895	3.81738	2.23412	2.19213	0.14054	0.105424	2.1625	1.80057	1.20101
33	ESP	Spain	西班牙	2000	D01T02	1.8	1.1	0.7	1.20382	1.80475	1	.	1	.	.	.	.	.	7.23021	14749.7	81.2983	15.3804	4.1e+10	6.0e+11	57.7271	6.0e+11	14713.1	4.1e+07	1.6e+11	45.4689	68.5963	0.88276	4.1e+10	65.9	1.26703	0.18742	1.80475	1878.02	484	2710	27.9692	3.74531	2.2593	3.68059	0.149801	0.117375	2.16544	1.79881	1.20382
33	ESP	Spain	西班牙	2001	D01T02	1.7	1.1	0.6	1.21029	1.78494	1	.	1	.	.	.	.	.	7.21625	15369	81.9434	16.1974	2.9e+10	6.3e+11	59.7837	6.3e+11	15355.7	4.1e+07	1.6e+11	43.2513	68.7646	0.88833	2.9e+10	68.1	1.263	1.13898	1.78494	1938.09	467	2528	27.9553	3.67764	2.18407	2.89993	0.149523	0.114726	2.17456	1.79674	1.21029
33	ESP	Spain	西班牙	2002	D01T02	2.3	1.5	0.8	1.19579	1.83551	1	.	1	.	.	.	.	.	7.54867	17106.7	83.0225	14.6054	3.9e+10	7.1e+11	61.588	7.1e+11	17025.5	4.1e+07	1.9e+11	41.224	68.9074	0.95971	3.9e+10	68.8	1.25897	3.00763	1.83551	1987.56	371	2763	27.7458	3.48902	2.02417	2.60672	0.146255	0.112977	2.16205	1.80805	1.19579
33	ESP	Spain	西班牙	2003	D01T02	5.1	2.9	2.2	1.18011	1.87777	1	.	1	.	.	.	.	.	7.55334	21510.8	84.5088	15.1014	3.1e+10	9.1e+11	63.9676	9.1e+11	21463.4	4.2e+07	2.5e+11	40.2819	69.0114	1.02373	3.1e+10	68.8	1.18634	5.02467	1.87777	2172.08	367	2813	27.4212	3.43116	1.98484	3.05533	0.141685	0.111689	2.15162	1.82323	1.18011
33	ESP	Spain	西班牙	2004	D01T02	13.9	6	7.9	1.16247	1.78515	1	.	1	.	.	.	.	.	7.81793	24907	85.9848	14.4622	2.5e+10	1.1e+12	66.0903	1.1e+12	24861.3	4.3e+07	3.0e+11	41.3229	69.0679	1.04089	2.5e+10	68.9	1.06768	7.91768	1.78515	2331.98	313	2871	26.994	3.12833	2.00606	3.78572	0.137407	0.11767	2.16885	1.86573	1.16247
33	ESP	Spain	西班牙	2005	D01T02	20.3	7.4	12.8	1.16197	1.74229	1	.	1	.	.	.	.	.	8.0292	26429.2	87.4655	12.6925	2.7e+10	1.2e+12	67.1534	1.2e+12	26419.3	4.4e+07	3.4e+11	41.7442	69.0753	1.09956	2.7e+10	67	1.10057	11.5261	1.74229	2492.56	313	3040	27.1689	2.76905	2.46943	4.34621	0.13912	0.120601	2.16136	1.86007	1.16197
33	ESP	Spain	西班牙	2006	D01T02	20.7	7.4	13.3	1.1226	1.66117	1	.	1	.	.	.	.	.	7.69813	28389.1	88.9761	13.7078	3.3e+10	1.3e+12	68.5345	1.3e+12	28365.3	4.4e+07	3.8e+11	43.0711	68.9077	1.17702	3.3e+10	68.2	0.876592	15.1704	1.66117	2588.91	316	3111	26.9325	2.41168	3.19753	4.60265	0.141538	0.130381	2.15904	1.92325	1.1226
33	ESP	Spain	西班牙	2007	D01T02	17.3	5.6	11.7	1.122	1.54937	1	.	1	.	.	.	.	.	7.84232	32591.4	90.6149	12.9302	6.8e+10	1.5e+12	68.7518	1.5e+12	32550	4.5e+07	4.4e+11	43.6509	68.7197	1.24053	6.8e+10	69.2	0.885168	17.8045	1.54937	2699.24	265	3267	26.3036	2.50795	2.95926	4.81149	0.14223	0.13233	2.17892	1.942	1.122
33	ESP	Spain	西班牙	2008	D01T02	18	6	12	1.10463	1.4871	1	.	1	.	.	.	.	.	7.05648	35510.7	92.1293	14.2554	7.4e+10	1.6e+12	69.7454	1.6e+12	35366.3	4.6e+07	4.5e+11	43.2122	68.5169	1.325	7.4e+10	69.1	0.893886	19.8752	1.4871	2843.28	252	3632	26.2904	2.36846	2.70479	6.61112	0.153236	0.132782	2.177	1.97078	1.10463
33	ESP	Spain	西班牙	2009	D01T02	23.8	8.4	15.3	1.09676	1.56349	1	.	1	.	.	.	.	.	6.20086	32169.5	92.9751	14.9796	9.5e+09	1.5e+12	71.5843	1.5e+12	32042.5	4.6e+07	3.4e+11	35.0405	68.3209	1.36364	9.6e+09	70.1	0.843848	21.1367	1.56349	2872.33	207	3596	24.8997	2.26545	2.49931	4.60707	0.151061	0.115597	2.11314	1.92671	1.09676
33	ESP	Spain	西班牙	2010	D01T02	68.7	23.5	45.1	1.14826	1.52153	1	.	1	.	.	.	.	.	5.86673	30532.5	93.1519	18.3751	3.7e+10	1.4e+12	75.9109	1.4e+12	30502.7	4.7e+07	3.1e+11	40.9252	68.1524	1.35996	3.7e+10	69.6	0.872154	22.8725	1.52153	2869.17	213	3566	23.1598	2.43113	3.38388	5.21854	0.163789	0.119324	2.20234	1.91797	1.14826
33	ESP	Spain	西班牙	2011	D01T02	153	49.1	104	1.12878	1.38408	1	.	1	.	.	.	.	.	5.87037	31677.9	93.5078	17.3891	2.7e+10	1.5e+12	80.038	1.5e+12	31636.4	4.7e+07	3.0e+11	46.1976	67.726	1.33341	2.7e+10	70.2	0.917038	23.899	1.38408	2766	196	3430	22.0811	2.37327	3.83147	6.34959	0.179693	0.138718	2.26817	2.0094	1.12878
33	ESP	Spain	西班牙	2012	D01T02	117.7	39.3	78.5	1.09998	1.5352	1	.	1	.	.	.	.	.	5.75685	28322.9	93.5068	18.7494	2.1e+10	1.3e+12	82.2703	1.3e+12	28324.4	4.7e+07	2.5e+11	47.749	67.382	1.29877	2.1e+10	69.1	0.883565	24.6482	1.5352	2693.78	209	3266	21.0345	2.40829	3.74602	7.66161	0.192008	0.14417	2.24014	2.03653	1.09998
33	ESP	Spain	西班牙	2013	D01T02	147.5	44.6	102.9	1.11135	1.60563	1	.	1	.	.	.	.	.	5.20818	29077.2	93.2009	20.8128	4.7e+10	1.4e+12	83.7256	1.4e+12	29059.5	4.7e+07	2.4e+11	48.6014	67.0809	1.27523	4.7e+10	68	0.836344	26.29	1.60563	2625.68	218	3026	20.265	2.6215	3.41226	7.07386	0.195611	0.139849	2.26486	2.03793	1.11135
33	ESP	Spain	西班牙	2014	D01T02	119.1	40.6	78.5	1.10316	1.63622	1	.	1	.	.	.	.	.	5.18408	29513.7	92.9227	21.6005	3.3e+10	1.4e+12	85.4463	1.4e+12	29461.6	4.6e+07	2.4e+11	49.9046	66.7751	1.24213	3.3e+10	67.2	0.788256	27.989	1.63622	2613.1	225	2953	20.0636	2.53523	3.37389	7.493	0.199019	0.140782	2.23055	2.02197	1.10316
33	ESP	Spain	西班牙	2015	D01T02	123.4	40.1	83.3	1.12174	1.75503	1	.	1	.	.	.	.	.	5.51801	25754.4	92.9527	19.9754	2.3e+10	1.2e+12	85.6118	1.2e+12	25732	4.6e+07	2.2e+11	49.7126	66.4468	1.22236	2.3e+10	67.6	0.793914	29.1676	1.75503	2623.35	221	2799	20.0736	2.73409	3.43195	5.17263	0.199295	0.135494	2.20569	1.96632	1.12174
33	ESP	Spain	西班牙	2016	D01T02	140.3	53.3	87	1.15119	1.7148	1	.	1	.	.	.	.	.	5.31437	26537.2	93.0493	.	4.4e+10	1.2e+12	86.5161	1.2e+12	26505.3	4.6e+07	2.2e+11	48.7715	66.3241	1.19048	4.4e+10	68.5	0.845523	30.3672	1.7148	2715.47	177	2745	19.9926	2.82425	3.12395	4.06976	0.198834	0.125394	2.19768	1.90905	1.15119
33	ESP	Spain	西班牙	2017	D01T02	136.2	52.1	84.1	1.16886	1.60298	1	.	1	.	.	.	.	.	5.65426	28185.3	93.2709	.	3.2e+10	1.3e+12	88.853	1.3e+12	28100.6	4.7e+07	2.5e+11	51.288	66.1508	1.21041	3.2e+10	63.6	0.797759	31.4875	1.60298	2855.75	176	2167	20.0456	2.78703	3.72814	5.82886	0.203439	0.134034	2.24911	1.92419	1.16886
33	ESP	Spain	西班牙	2018	D01T02	219.6	74.9	144.8	1.17019	1.66163	1	.	1	.	.	.	.	.	5.49263	30379.7	93.6698	.	5.9e+10	1.4e+12	91.1126	1.4e+12	30349.8	4.7e+07	2.8e+11	51.9127	65.9545	1.24323	5.5e+10	65.1	0.808154	32.4349	1.66163	3000.89	149	1525	19.8659	2.75622	3.78115	6.55643	0.207567	0.137405	2.26315	1.934	1.17019
34	SWE	Sweden	瑞典	1995	D01T02	2.3	1.3	1	1.306	0.224255	1	.	1	.	.	.	.	.	6.59695	30283.1	21.6697	46.2996	1.5e+10	2.7e+11	42.3988	2.7e+11	30283	8.8e+06	5.3e+10	54.423	63.6502	3.16656	1.5e+10	61.4	1.70236	.	0.224255	.	924	3941	26.9208	2.88912	2.91918	1.87513	0.248865	0.168566	2.74427	2.10128	1.306
34	SWE	Sweden	瑞典	1996	D01T02	2.6	1.2	1.3	1.24829	0.26157	1	.	1	.	.	.	.	.	7.19912	32999.2	21.7042	45.658	5.5e+09	2.9e+11	45.9636	2.9e+11	32999	8.8e+06	5.9e+10	52.0477	63.6274	3.22025	5.5e+09	61.8	1.69776	.	0.26157	.	857	4111	26.2212	2.55393	2.64916	2.17584	0.230173	0.167077	2.69332	2.15761	1.24829
34	SWE	Sweden	瑞典	1997	D01T02	2.4	1.4	1	1.27124	0.291663	1	.	1	.	.	.	.	.	6.48668	30312.5	21.7167	46.6513	1.0e+10	2.7e+11	49.6413	2.7e+11	30312.5	8.8e+06	5.4e+10	55.3254	63.7196	3.27394	1.0e+10	63.3	1.69316	.	0.291663	4158.15	940	4130	26.3133	2.47007	2.84723	2.17679	0.257929	0.174041	2.75008	2.16329	1.27124
34	SWE	Sweden	瑞典	1998	D01T02	2.9	1.5	1.4	1.2617	0.387235	1	.	1	.	.	.	.	.	6.59401	30596.6	21.7287	47.9527	2.3e+10	2.7e+11	51.9688	2.7e+11	30596.5	8.9e+06	5.7e+10	56.5601	63.8948	3.32763	2.3e+10	64	1.68857	.	0.387235	.	753	3972	26.3955	2.31134	2.53108	1.82635	0.259313	0.178324	2.73419	2.16707	1.2617
34	SWE	Sweden	瑞典	1999	D01T02	3.1	1.8	1.3	1.23919	0.271692	1	.	1	.	.	.	.	.	6.46486	30941	21.7457	48.4769	6.3e+10	2.7e+11	63.5507	2.7e+11	30941.1	8.9e+06	5.9e+10	55.9958	64.0935	3.38132	6.3e+10	64.2	1.71604	.	0.271692	4499.08	853	4142	26.0247	2.13019	2.52774	2.13463	0.249508	0.185177	2.71376	2.18995	1.23919
34	SWE	Sweden	瑞典	2000	D01T02	2.9	1.1	1.8	1.22923	0.244197	1	.	1	.	.	.	.	.	6.00505	29624.8	21.7806	44.4745	2.3e+10	2.6e+11	67.0748	2.6e+11	29624.9	8.9e+06	5.9e+10	60.8792	64.274	3.62756	2.3e+10	65.1	1.74351	2.80688	0.244197	.	844	4224	26.3731	1.94286	2.35755	3.31859	0.259977	0.206652	2.76732	2.25126	1.22923
34	SWE	Sweden	瑞典	2001	D01T02	3.3	1.4	1.9	1.21194	0.2711	1	.	1	.	.	.	.	.	5.90125	27247.8	21.8392	48.6623	1.8e+10	2.4e+11	70.2663	2.4e+11	27247.9	8.9e+06	5.5e+10	57.2803	64.6093	3.8738	1.8e+10	66.6	1.77045	6.59792	0.2711	5169.3	574	3926	26.0144	1.94494	2.4673	3.33532	0.249322	0.207161	2.72116	2.24529	1.21194
34	SWE	Sweden	瑞典	2002	D01T02	4.9	2.3	2.5	1.2354	0.264877	1	.	1	.	.	.	.	.	6.0531	29899.1	21.9104	44.5611	1.8e+10	2.7e+11	75.2826	2.7e+11	29899.2	8.9e+06	5.9e+10	55.6322	64.827	3.72664	1.8e+10	70.8	1.79738	9.4107	0.264877	.	597	3358	25.6149	1.89968	2.41679	2.89073	0.248372	0.192677	2.71399	2.19686	1.2354
34	SWE	Sweden	瑞典	2003	D01T02	3.6	1.6	2	1.22743	0.276802	1	.	1	.	.	.	.	.	6.16223	37321.8	21.992	43.9724	6.0e+09	3.3e+11	81.4198	3.3e+11	37321.8	9.0e+06	7.2e+10	55.526	64.9763	3.57948	6.0e+09	70	1.79179	12.2189	0.276802	5383.05	703	3025	25.1999	1.85863	2.33475	3.12792	0.242498	0.188198	2.71668	2.21331	1.22743
34	SWE	Sweden	瑞典	2004	D01T02	3.6	1.3	2.3	1.23648	0.289349	1	.	1	.	.	.	.	.	5.95909	42821.8	22.0787	47.4183	1.7e+10	3.9e+11	83.7612	3.9e+11	42821.7	9.0e+06	8.4e+10	58.0861	65.1255	3.36129	1.7e+10	70.1	1.82553	15.6593	0.289349	5426.08	462	2768	25.0692	1.82775	2.65485	3.84504	0.251501	0.192481	2.75894	2.23128	1.23648
34	SWE	Sweden	瑞典	2005	D01T02	5.4	1.6	3.8	1.21076	0.274401	1	.	1	.	.	.	.	.	5.5602	43437.1	22.1672	47.2382	2.1e+10	3.9e+11	81.9538	3.9e+11	43437.1	9.0e+06	8.8e+10	61.8684	65.2888	3.35958	2.1e+10	69.8	1.69078	27.8621	0.274401	6085.11	438	2522	24.9005	1.25377	3.08553	4.97851	0.266583	0.229901	2.81268	2.32308	1.21076
34	SWE	Sweden	瑞典	2006	D01T02	5.2	1.6	3.6	1.1827	0.278013	1	.	1	.	.	.	.	.	5.38476	46593.3	22.2922	45.1201	2.2e+10	4.2e+11	79.3248	4.2e+11	46593.6	9.1e+06	9.8e+10	65.0778	65.2601	3.475	2.2e+10	70.9	1.68103	27.3375	0.278013	6126.65	413	2446	25.2546	1.36222	3.86347	5.57557	0.268272	0.233097	2.79899	2.36661	1.1827
34	SWE	Sweden	瑞典	2007	D01T02	5.7	1.6	4.1	1.2311	0.316423	1	.	1	.	.	.	.	.	5.15258	53700.2	22.4581	46.0695	4.6e+10	4.9e+11	74.8371	4.9e+11	53700	9.1e+06	1.2e+11	65.5555	65.3332	3.23383	4.6e+10	69.3	1.75555	30.3384	0.316423	4999.71	398	2527	25.444	1.57842	3.88152	4.9719	0.278859	0.225245	2.88771	2.34563	1.2311
34	SWE	Sweden	瑞典	2008	D01T02	5.7	1.6	4.2	1.17783	0.280368	1	.	1	.	.	.	.	.	5.00553	56152.6	22.6338	45.3671	4.1e+10	5.2e+11	70.737	5.2e+11	56152.6	9.2e+06	1.3e+11	67.9594	65.4308	3.46999	4.1e+10	70.8	1.73353	31.4525	0.280368	5437.17	306	2549	24.4833	1.56747	3.99775	7.36848	0.265289	0.2384	2.82593	2.39928	1.17783
34	SWE	Sweden	瑞典	2009	D01T02	6.9	2.1	4.7	1.13732	0.273953	1	.	1	.	.	.	.	.	4.6114	46946.8	22.8274	43.0104	9.0e+09	4.4e+11	70.7432	4.4e+11	46947	9.3e+06	9.8e+10	57.4194	65.4316	3.39528	9.0e+09	70.5	1.75809	31.6629	0.273953	5079.73	463	2186	22.403	1.43668	3.70919	6.14692	0.251116	0.21108	2.68811	2.36355	1.13732
34	SWE	Sweden	瑞典	2010	D01T02	8.3	2.9	5.4	1.19454	0.327283	1	.	1	.	.	.	.	.	5.13225	52869	23.0229	41.4269	6.3e+08	5.0e+11	73.6731	5.0e+11	52869	9.4e+06	1.1e+11	62.0184	65.2735	3.16789	6.3e+08	72.4	1.75491	31.9721	0.327283	5251.45	353	2196	23.7527	1.64941	4.8189	6.9817	0.255789	0.214157	2.75836	2.30914	1.19454
34	SWE	Sweden	瑞典	2011	D01T02	11.9	3.6	8.2	1.19111	0.273807	1	.	1	.	.	.	.	.	4.71766	60755.8	23.1974	43.4053	7.0e+09	5.7e+11	72.8254	5.7e+11	60755.8	9.4e+06	1.3e+11	63.4023	64.9852	3.18702	7.0e+09	71.9	1.80759	31.9778	0.273807	5144.55	337	2004	23.6324	1.67048	5.21123	7.3052	0.250558	0.213643	2.76647	2.3226	1.19111
34	SWE	Sweden	瑞典	2012	D01T02	11	4.3	6.7	1.16142	0.273052	1	.	1	.	.	.	.	.	4.42661	58037.8	23.3696	46.0005	4.3e+09	5.5e+11	68.8177	5.5e+11	58037.8	9.5e+06	1.3e+11	60.9576	64.5603	3.23025	4.3e+09	71.7	1.83171	32.1597	0.273052	5164.1	148	2288	23.0033	1.54715	5.27893	9.38408	0.238161	0.210952	2.6814	2.30873	1.16142
34	SWE	Sweden	瑞典	2013	D01T02	14.3	5	9.4	1.12631	0.2651	1	.	1	.	.	.	.	.	4.22233	61126.9	23.5685	46.7712	1.3e+09	5.9e+11	63.2172	5.9e+11	61126.9	9.6e+06	1.3e+11	55.9195	64.0385	3.26042	1.3e+09	72.9	1.81082	32.6214	0.2651	6674.35	163	2332	22.0683	1.46654	4.66026	7.84875	0.224035	0.208452	2.57702	2.28803	1.12631
34	SWE	Sweden	瑞典	2014	D01T02	20.7	8.8	11.8	1.13536	0.285607	1	.	1	.	.	.	.	.	4.03096	60020.4	23.8035	47.4723	-8600000000	5.8e+11	62.1806	5.8e+11	60020.4	9.7e+06	1.4e+11	56.1643	63.5249	3.10184	-8600000000	73.1	1.73953	33.6641	0.285607	6875.99	441	1984	21.7861	1.4433	4.67743	8.08175	0.227861	0.211632	2.58565	2.27738	1.13536
34	SWE	Sweden	瑞典	2015	D01T02	20.5	9.5	11.1	1.17326	0.296669	1	.	1	.	.	.	.	.	3.99956	51545.5	24.0583	43.2412	1.0e+10	5.1e+11	62.2825	5.1e+11	51545.5	9.8e+06	1.2e+11	55.1215	63.0972	3.21903	1.0e+10	72.7	1.73705	35.4972	0.296669	6834.03	390	2038	22.1581	1.44956	4.00897	6.17712	0.233325	0.202864	2.6008	2.21673	1.17326
34	SWE	Sweden	瑞典	2016	D01T02	22.7	10.2	12.5	1.17307	0.263762	1	.	1	.	.	.	.	.	3.9083	51965.2	24.3624	.	1.6e+10	5.2e+11	63.548	5.2e+11	51965.2	9.9e+06	1.3e+11	54.3602	62.7715	3.24736	1.6e+10	72	1.73676	36.9703	0.263762	7154.53	352	2032	21.7133	1.39874	3.99595	5.64525	0.209981	0.189595	2.67461	2.28001	1.17307
34	SWE	Sweden	瑞典	2017	D01T02	27.2	11.6	15.5	1.1877	0.25533	1	.	1	.	.	.	.	.	3.80721	53791.5	24.6929	.	2.5e+10	5.4e+11	66.9882	5.4e+11	53791.5	1.0e+07	1.4e+11	56.7698	62.5134	3.36279	2.8e+10	74.9	1.71204	38.3254	0.25533	7383.42	305	1992	22.1284	1.44354	4.76473	6.43407	0.211785	0.18291	2.63833	2.22137	1.1877
34	SWE	Sweden	瑞典	2018	D01T02	37	12.5	24.5	1.20805	0.370255	1	.	1	.	.	.	.	.	3.5393	54589.1	24.9815	.	-1400000000	5.6e+11	72.4612	5.6e+11	54589.1	1.0e+07	1.4e+11	60.5941	62.3227	3.31278	-950000000	76.3	1.69855	38.7913	0.370255	7536.48	442	1838	22.0024	1.39279	4.56421	7.43467	0.253011	0.200849	2.69215	2.22851	1.20805
35	CHE	Switzerland	瑞士	1995	D01T02	3.7	3.6	0.1	1.03049	0.119865	1	.	1	.	.	.	.	.	6.16977	50115.1	178.114	37.6681	4.2e+09	3.5e+11	31.3387	3.5e+11	50156	7.0e+06	9.4e+10	45.8165	67.6727	2.47985	4.2e+09	75	1.64372	.	0.119865	.	830	2890	29.0802	1.39878	2.52375	0.100228	0.06555	0.14832	2.11325	2.05072	1.03049
35	CHE	Switzerland	瑞士	1996	D01T02	2.4	2.2	0.2	0.992396	0.117699	1	.	1	.	.	.	.	.	6.2227	48092.3	178.907	36.5106	4.9e+09	3.4e+11	32.3965	3.4e+11	48144.6	7.1e+06	8.7e+10	46.3978	67.4814	2.44857	4.9e+09	76.8	1.6857	.	0.117699	3140.79	718	2504	28.0284	1.21981	2.47212	0.11905	0.066712	0.167291	2.11554	2.13175	0.992396
35	CHE	Switzerland	瑞士	1997	D01T02	3.3	2.7	0.6	1.00986	0.118705	1	.	1	.	.	.	.	.	6.03031	41584.1	179.343	36.7615	8.4e+09	3.0e+11	33.8431	3.0e+11	41631.4	7.1e+06	7.5e+10	51.5415	67.3575	2.41729	8.4e+09	78.6	1.72768	.	0.118705	.	620	2408	27.2867	1.24519	3.22692	0.237382	0.076103	0.182909	2.15657	2.13552	1.00986
35	CHE	Switzerland	瑞士	1998	D01T02	4.9	3.5	1.4	1.00897	0.12195	1	.	1	.	.	.	.	.	6.22325	42680.2	179.882	36.82	1.1e+10	3.0e+11	35.2897	3.0e+11	42740.1	7.1e+06	8.1e+10	52.3064	67.2975	2.386	1.1e+10	79	1.76966	.	0.12195	.	564	2025	26.649	1.17193	3.35447	0.202739	0.075564	0.176497	2.14525	2.12617	1.00897
35	CHE	Switzerland	瑞士	1999	D01T02	3.8	2.9	0.8	0.999412	0.12806	1	.	1	.	.	.	.	.	6.23294	41696.9	180.746	38.0277	1.5e+10	3.0e+11	36.9937	3.0e+11	41786.2	7.1e+06	8.0e+10	53.6503	67.2794	2.35472	1.5e+10	79.1	1.80031	.	0.12806	.	535	1916	26.2813	1.09235	4.09871	0.21933	0.07501	0.179086	2.14488	2.14614	0.999412
35	CHE	Switzerland	瑞士	2000	D01T02	4.7	3.9	0.8	1.00497	0.13598	1	.	1	.	.	.	.	.	6.08398	38864	181.769	39.0181	2.3e+10	2.8e+11	37.779	2.8e+11	38952	7.2e+06	7.6e+10	58.2548	67.2884	2.32344	2.3e+10	76.8	1.83096	0.785513	0.13598	3654.24	468	2083	25.4682	1.05389	5.64126	0.359211	0.085441	0.188578	2.15864	2.14797	1.00497
35	CHE	Switzerland	瑞士	2001	D01T02	4.7	4.4	0.3	0.963856	0.130366	1	.	1	.	.	.	.	.	6.24559	39638.4	182.928	37.7618	9.8e+09	2.9e+11	39.7723	2.9e+11	39727.8	7.2e+06	7.6e+10	57.8797	67.3869	2.41075	9.8e+09	76	1.81719	1.93788	0.130366	.	594	1859	26.2443	0.920924	4.05797	0.323286	0.081681	0.202588	2.11297	2.1922	0.963856
35	CHE	Switzerland	瑞士	2002	D01T02	4.4	4	0.4	0.970404	0.121208	1	.	1	.	.	.	.	.	5.98144	42458.5	184.321	38.5325	8.3e+09	3.1e+11	40.9465	3.1e+11	42578.8	7.3e+06	8.2e+10	57.6731	67.5126	2.49806	8.3e+09	79.3	1.80342	6.25605	0.121208	.	466	1827	26.434	0.933658	3.64696	2.01166	0.07791	0.191799	2.15466	2.22037	0.970404
35	CHE	Switzerland	瑞士	2003	D01T02	6.3	5.9	0.4	0.944663	0.116021	1	.	1	.	.	.	.	.	6.10976	49337.5	185.699	38.7948	2.0e+10	3.6e+11	44.0397	3.6e+11	49470.4	7.3e+06	9.4e+10	56.4808	67.655	2.58538	2.0e+10	79	1.70732	10.693	0.116021	.	396	1831	26.0064	0.836992	3.06663	2.01154	0.07654	0.198466	2.15567	2.28195	0.944663
35	CHE	Switzerland	瑞士	2004	D01T02	3.6	3.4	0.2	0.97842	0.117833	1	.	1	.	.	.	.	.	6.12804	54659.6	186.984	38.3032	7.1e+09	4.1e+11	45.6008	4.1e+11	54878.5	7.4e+06	1.1e+11	58.847	67.7993	2.67269	7.1e+09	79.5	1.77726	16.6288	0.117833	3468.17	434	1742	25.5515	0.935	3.12039	1.85628	0.083429	0.193192	2.19113	2.23945	0.97842
35	CHE	Switzerland	瑞士	2005	D01T02	4	3.3	0.7	0.952711	0.115989	1	.	1	.	.	.	.	.	6.16512	56243.9	188.196	35.4609	2.7e+09	4.2e+11	45.8041	4.2e+11	56546.8	7.4e+06	1.1e+11	61.231	67.9271	2.6832	2.7e+09	79.3	1.68681	22.4706	0.115989	.	455	1643	25.8271	0.818619	2.72136	2.13027	0.086001	0.214361	2.16292	2.27028	0.952711
35	CHE	Switzerland	瑞士	2006	D01T02	3.6	3.3	0.3	0.957303	0.090114	1	.	1	.	.	.	.	.	6.07692	59009	189.385	37.6631	5.4e+10	4.4e+11	46.5378	4.4e+11	59300.6	7.5e+06	1.2e+11	65.1768	68.0289	2.69371	5.4e+10	78.9	1.71197	27.4272	0.090114	.	362	1740	26.0028	0.753298	3.50144	2.53655	0.085455	0.215846	2.1731	2.27002	0.957303
35	CHE	Switzerland	瑞士	2007	D01T02	4	3.8	0.1	0.977163	0.073477	1	.	1	.	.	.	.	.	5.76619	64991	191.09	40.3324	4.9e+10	4.9e+11	47.2425	4.9e+11	65359.5	7.6e+06	1.3e+11	67.5244	68.1034	2.70421	4.9e+10	78	1.73689	31.5648	0.073477	.	342	1692	25.9309	0.773163	3.05195	2.10764	0.094153	0.217651	2.21929	2.27116	0.977163
35	CHE	Switzerland	瑞士	2008	D01T02	5.8	5.7	0.1	1.00978	0.062391	1	.	1	.	.	.	.	.	5.87924	74175.9	193.534	39.074	3.0e+09	5.7e+11	48.8333	5.7e+11	74572.2	7.6e+06	1.5e+11	67.3909	68.1383	2.71472	3.0e+09	79.5	1.71331	33.4669	0.062391	3298.21	439	1594	25.9463	0.783534	3.05438	2.55296	0.096653	0.215116	2.25546	2.23362	1.00978
35	CHE	Switzerland	瑞士	2009	D01T02	6.8	6.7	0.1	0.960107	0.062673	1	.	1	.	.	.	.	.	5.63915	71565.6	195.967	38.748	4.8e+10	5.6e+11	50.1481	5.6e+11	72083.2	7.7e+06	1.4e+11	58.7338	68.1232	2.8326	4.8e+10	79.4	1.69701	35.4416	0.062673	.	394	1684	24.7428	0.722508	2.39259	2.39169	0.083492	0.213833	2.19914	2.29051	0.960107
35	CHE	Switzerland	瑞士	2010	D01T02	11.7	11.5	0.2	1.00069	0.067488	1	.	1	.	.	.	.	.	5.77742	76531.4	198.019	39.4349	1.8e+10	6.0e+11	52.9377	6.0e+11	77117.1	7.8e+06	1.5e+11	61.6289	68.0503	2.95047	1.8e+10	81.1	1.69537	37.2457	0.067488	.	533	1622	24.6945	0.662941	4.01294	2.8191	0.106723	0.218671	2.29149	2.28991	1.00069
35	CHE	Switzerland	瑞士	2011	D01T02	13.5	13	0.4	1.03413	0.069347	1	.	1	.	.	.	.	.	5.20604	90476.8	200.233	40.2838	2.1e+10	7.2e+11	54.4845	7.2e+11	91254	7.9e+06	1.8e+11	61.3595	67.9425	3.06835	2.1e+10	81.9	1.69023	38.9122	0.069347	.	446	1597	25.0315	0.6767	3.71805	3.11449	0.125359	0.225799	2.36309	2.28509	1.03413
35	CHE	Switzerland	瑞士	2012	D01T02	16.3	15.2	1.2	0.999008	0.070265	1	.	1	.	.	.	.	.	5.31666	85836.2	202.37	39.9044	4.0e+10	6.9e+11	55.5205	6.9e+11	86547.7	8.0e+06	1.8e+11	87.9088	67.8014	3.18623	4.0e+10	81.1	1.76243	40.176	0.070265	4468.65	1508	1480	24.6039	0.634587	2.92129	2.34454	0.121851	0.236229	2.3311	2.33342	0.999008
35	CHE	Switzerland	瑞士	2013	D01T02	20.6	18.9	1.7	1.00421	0.071944	1	.	1	.	.	.	.	.	5.3813	87304.3	204.711	38.8671	-25000000000	7.1e+11	56.2701	7.1e+11	88109.5	8.1e+06	1.8e+11	95.3157	67.6195	3.24802	-25000000000	81	1.73662	42.5067	0.071944	.	631	1525	24.7022	0.662534	2.40173	1.01914	0.12657	0.24527	2.31185	2.30217	1.00421
35	CHE	Switzerland	瑞士	2014	D01T02	37.1	35.3	1.7	0.972466	0.073708	1	.	1	.	.	.	.	.	4.85957	88725	207.224	42.4228	2.1e+10	7.3e+11	57.2297	7.3e+11	89684.7	8.2e+06	1.9e+11	79.9221	67.4137	3.30981	2.1e+10	81.6	1.8379	43.1861	0.073708	.	568	1480	24.3239	0.708878	2.20033	1.11393	0.105652	0.215846	2.22083	2.28371	0.972466
35	CHE	Switzerland	瑞士	2015	D01T02	46.6	40.5	6	0.957593	0.072804	1	.	1	.	.	.	.	.	4.71975	83806.4	209.596	39.8865	1.2e+11	7.0e+11	57.7074	7.0e+11	84776.1	8.3e+06	1.8e+11	77.2979	67.2093	3.3716	1.2e+11	80.5	1.78644	44.6834	0.072804	5271.93	446	1477	24.2011	0.626446	1.63771	0.9494	0.104196	0.230697	2.22468	2.3232	0.957593
35	CHE	Switzerland	瑞士	2016	D01T02	45.4	36.6	8.8	0.968627	0.071192	1	.	1	.	.	.	.	.	4.73724	82153.1	211.897	.	1.7e+11	7.0e+11	58.047	7.0e+11	83073.3	8.4e+06	1.8e+11	82.3789	66.9385	3.36979	1.7e+11	81	1.78241	45.0969	0.071192	.	309	1462	24.09	0.65801	1.47295	0.617289	0.110149	0.240857	2.22831	2.30048	0.968627
35	CHE	Switzerland	瑞士	2017	D01T02	45.4	36.6	8.8	0.968849	0.070899	1	.	1	.	.	.	.	.	4.57877	82254.4	213.884	.	1.4e+11	7.0e+11	59.563	7.1e+11	83352.1	8.5e+06	1.8e+11	80.831	66.6966	3.36798	1.4e+11	81.5	1.77817	46.3425	0.070899	5235.81	291	1337	24.2177	0.631334	1.63892	0.691126	0.105925	0.230353	2.21093	2.28202	0.968849
35	CHE	Switzerland	瑞士	2018	D01T02	46	37.8	8.2	0.986311	0.072388	1	.	1	.	.	.	.	.	4.40214	85216.6	215.465	.	-160000000000	7.4e+11	61.3774	7.4e+11	86388.4	8.5e+06	1.9e+11	80.2509	66.4658	3.36617	-150000000000	81.7	1.78704	45.6152	0.072388	.	332	1283	24.424	0.643751	1.69967	0.936366	0.107079	0.222062	2.24545	2.27661	0.986311
36	TUR	Turkey	土耳其	1995	D01T02	5.2	1.3	3.9	1.15817	2.35754	0	.	1	.	.	.	.	.	2.83533	2855.04	77.0571	4.69965	8.9e+08	1.7e+11	20.2806	1.7e+11	2897.87	5.8e+07	4.0e+10	33.8134	61.7599	0.41149	8.9e+08	58.4	-0.247504	.	2.35754	.	1520	170	32.0201	15.6932	3.30527	1.33512	0.046257	0.016606	1.39979	1.20862	1.15817
36	TUR	Turkey	土耳其	1996	D01T02	7.4	1.7	5.7	1.16898	2.93027	0	.	1	.	.	.	.	.	3.07391	3009.67	78.3413	4.86538	7.2e+08	1.8e+11	22.1336	1.8e+11	3053.95	5.9e+07	4.6e+10	36.8496	62.101	0.45159	7.2e+08	56.7	-0.274155	.	2.93027	304.342	735	189	30.618	16.8546	3.0603	1.15433	0.058536	0.019387	1.42473	1.21878	1.16898
36	TUR	Turkey	土耳其	1997	D01T02	2.6	1.5	1	1.17672	2.4099	0	.	1	.	.	.	.	.	3.1566	3098.67	79.6193	4.76742	8.1e+08	1.9e+11	23.9867	1.9e+11	3144.39	6.0e+07	5.0e+10	39.4132	62.4099	0.49169	8.1e+08	60.8	-0.300807	.	2.4099	313.189	1327	203	30.7799	14.4612	3.04631	0.733054	0.058906	0.019146	1.44085	1.22446	1.17672
36	TUR	Turkey	土耳其	1998	D01T02	3.7	2.2	1.5	1.19133	2.09822	0	.	1	.	.	.	.	.	3.11184	4433.35	80.8729	5.02815	9.4e+08	2.8e+11	23.2543	2.8e+11	4499.74	6.1e+07	6.5e+10	26.3807	62.7002	0.36224	9.4e+08	60.9	-0.327459	.	2.09822	308.578	2276	207	31.0354	12.4503	2.87915	0.963153	0.049419	0.014047	1.43073	1.20095	1.19133
36	TUR	Turkey	土耳其	1999	D01T02	3.3	1.8	1.4	1.21632	2.09376	0	.	1	.	.	.	.	.	3.04898	4057.82	82.0987	4.4647	7.8e+08	2.6e+11	23.8626	2.6e+11	4116.17	6.2e+07	5.1e+10	26.0596	62.9945	0.45646	7.8e+08	59.2	-0.241783	.	2.09376	322.136	2744	276	28.2861	10.4578	2.78893	1.26662	0.049613	0.017077	1.46897	1.20772	1.21632
36	TUR	Turkey	土耳其	2000	D01T02	4	2.3	1.7	1.26723	2.02485	0	.	1	.	.	.	.	.	3.37521	4278.27	83.3044	3.85314	9.8e+08	2.7e+11	28.5655	2.7e+11	4337.48	6.3e+07	6.1e+10	29.9953	63.3046	0.46783	9.8e+08	63.4	-0.156107	.	2.02485	365.005	3156	277	26.7974	10.0329	2.58742	1.0688	0.050265	0.021771	1.53618	1.21224	1.26723
36	TUR	Turkey	土耳其	2001	D01T02	3.5	2.1	1.4	1.18349	2.06326	0	.	1	.	.	.	.	.	3.03926	3100.46	84.5497	3.68644	3.4e+09	2.0e+11	33.2683	2.0e+11	3142.92	6.4e+07	3.6e+10	36.0508	63.5469	0.52638	3.4e+09	60.6	-0.194158	0.016774	2.06326	353.656	2875	337	25.5036	8.78804	2.22073	1.41872	0.071476	0.043568	1.6532	1.39688	1.18349
36	TUR	Turkey	土耳其	2002	D01T02	5.8	3.3	2.4	1.30808	2.0218	0	.	1	.	.	.	.	.	3.15369	3640.76	85.7408	4.48986	1.1e+09	2.4e+11	37.9712	2.4e+11	3687.96	6.5e+07	4.7e+10	36.4669	63.8412	0.51294	1.1e+09	54.2	-0.232208	0.032134	2.0218	368.33	1424	414	24.5917	10.1908	2.00856	1.91008	0.060173	0.031848	1.68659	1.28937	1.30808
36	TUR	Turkey	土耳其	2003	D01T02	10.9	6.4	4.6	1.31633	1.92977	0	.	1	.	.	.	.	.	3.27751	4704.77	86.8824	4.53409	1.7e+09	3.1e+11	42.6741	3.2e+11	4760.1	6.6e+07	6.5e+10	37.0616	64.156	0.46945	1.7e+09	51.9	-0.122829	0.298089	1.92977	494.179	348	489	24.7937	9.79515	2.00613	2.07422	0.054627	0.035391	1.74874	1.3285	1.31633
36	TUR	Turkey	土耳其	2004	D01T02	16.9	7.1	9.8	1.30014	1.94563	0	.	1	.	.	.	.	.	3.31343	6031.79	88.0749	5.3809	2.8e+09	4.1e+11	47.3769	4.1e+11	6101.63	6.7e+07	1.0e+11	39.3046	64.4543	0.50215	2.8e+09	52.8	-0.133874	0.852593	1.94563	505.538	235	682	25.107	9.32742	2.17627	2.26412	0.055228	0.042598	1.79975	1.38427	1.30014
36	TUR	Turkey	土耳其	2005	D01T02	10.7	3.8	6.8	1.28582	1.88012	0	.	1	.	.	.	.	.	3.42048	7369.43	89.2698	4.77988	1.0e+10	5.1e+11	52.0798	5.1e+11	7456.3	6.8e+07	1.3e+11	37.5759	64.7223	0.56931	1.0e+10	50.6	-0.006885	2.31391	1.88012	576.391	218	928	25.2373	9.16534	2.46802	3.59438	0.048758	0.044553	1.80587	1.40445	1.28582
36	TUR	Turkey	土耳其	2006	D01T02	15	4.1	10.9	1.1855	1.90105	0	.	1	.	.	.	.	.	3.75113	8003.81	90.4348	4.69095	2.0e+10	5.6e+11	56.7827	5.6e+11	8101.86	6.9e+07	1.6e+11	40.4107	65.002	0.55749	2.0e+10	57	-0.028157	3.9851	1.90105	620.498	160	1072	26.0338	8.09488	3.30023	4.16932	0.050904	0.07022	1.87271	1.57967	1.1855
36	TUR	Turkey	土耳其	2007	D01T02	21.9	6.2	15.7	1.11115	1.75195	0	.	1	.	.	.	.	.	4.10064	9668.4	91.562	3.83402	2.2e+10	6.8e+11	61.4855	6.8e+11	9791.88	7.0e+07	1.9e+11	40.7045	65.2431	0.69182	2.2e+10	57.4	-0.020085	6.7459	1.75195	713.805	211	1810	26.3739	7.45703	3.46792	4.79888	0.049505	0.086579	1.91141	1.72021	1.11115
36	TUR	Turkey	土耳其	2008	D01T02	34	9.7	24.2	1.11155	1.6584	0	.	1	.	.	.	.	.	4.02681	10802.6	92.6688	3.86391	2.0e+10	7.7e+11	66.1884	7.7e+11	10941.2	7.0e+07	2.1e+11	43.3494	65.4618	0.69292	2.0e+10	59.9	-0.023566	8.07194	1.6584	749.956	176	2221	26.1478	7.42467	3.30886	5.70453	0.056191	0.093645	1.92364	1.73059	1.11155
36	TUR	Turkey	土耳其	2009	D01T02	15.8	5.2	10.5	1.18373	1.50655	0	.	1	.	.	.	.	.	3.98511	8989.74	93.8446	4.38503	8.6e+09	6.5e+11	70.8913	6.5e+11	9103.47	7.1e+07	1.4e+11	37.4374	65.6771	0.8094	8.6e+09	61.6	-0.056103	8.93074	1.50655	809.835	177	2555	24.0238	8.07199	3.06416	3.83892	0.052228	0.070128	1.91546	1.61815	1.18373
36	TUR	Turkey	土耳其	2010	D01T02	21.9	7.4	14.5	1.25567	1.45972	0	.	1	.	.	.	.	.	4.05919	10615	95.1046	5.3277	9.1e+09	7.8e+11	75.5941	7.8e+11	10742.8	7.2e+07	1.9e+11	38.5367	65.8864	0.79892	9.1e+09	63.8	-0.044426	9.69756	1.45972	889.584	177	3180	24.4902	8.96693	4.33439	3.83636	0.044782	0.057726	1.83863	1.46426	1.25567
36	TUR	Turkey	土耳其	2011	D01T02	44.5	13.7	30.9	1.14864	1.39575	0	.	1	.	.	.	.	.	4.28347	11308.4	96.376	5.38113	1.6e+10	8.4e+11	80.297	8.4e+11	11420.6	7.3e+07	2.3e+11	44.798	66.0421	0.79988	1.6e+10	64.2	-0.043146	10.2346	1.39575	981.827	228	3885	26.8375	8.17396	4.16568	4.75328	0.049172	0.088256	1.84379	1.6052	1.14864
36	TUR	Turkey	土耳其	2012	D01T02	48.6	16.3	32.3	1.10209	1.42609	0	.	1	.	.	.	.	.	4.36888	11697.5	97.8099	5.7271	1.4e+10	8.8e+11	84.9999	8.8e+11	11795.6	7.5e+07	2.4e+11	44.1774	66.1887	0.83217	1.4e+10	62.5	-0.067467	10.4533	1.42609	1100.08	232	4434	26.6493	7.69488	3.91168	4.90475	0.053908	0.097156	1.86118	1.68877	1.10209
36	TUR	Turkey	土耳其	2013	D01T02	38.9	14.2	24.7	1.03213	1.38231	0	.	1	.	.	.	.	.	4.15493	12507.8	99.4973	6.11514	1.4e+10	9.6e+11	89.7027	9.6e+11	12614.8	7.6e+07	2.7e+11	44.0918	66.3193	0.81821	1.4e+10	62.9	-0.088625	11.6138	1.38231	1173.19	269	4392	27.68	6.67611	4.1253	6.11134	0.05032	0.119421	1.92863	1.8686	1.03213
36	TUR	Turkey	土耳其	2014	D01T02	46.2	23	23.2	1.03106	1.39513	0	.	1	.	.	.	.	.	4.36093	12020.3	101.493	4.95017	1.3e+10	9.4e+11	94.4056	9.4e+11	12158	7.7e+07	2.7e+11	44.4801	66.4312	0.86077	1.3e+10	64.9	-0.133756	11.3508	1.39513	1160.92	331	4766	28.1167	6.55724	3.77276	4.36814	0.053889	0.120899	1.97087	1.91149	1.03106
36	TUR	Turkey	土耳其	2015	D01T02	45.7	26	19.7	1.07812	1.38212	0	.	1	.	.	.	.	.	4.41445	10851.9	103.486	6.6543	1.9e+10	8.6e+11	99.1085	8.6e+11	11006.3	7.9e+07	2.6e+11	42.1837	66.5313	0.8815	1.9e+10	63.2	-0.272529	11.9335	1.38212	1211.79	489	5352	27.8343	6.86838	3.54672	3.26418	0.053216	0.104711	1.98285	1.83918	1.07812
36	TUR	Turkey	土耳其	2016	D01T02	40	20.8	19.2	1.02297	1.37498	0	.	1	.	.	.	.	.	4.62345	10734.3	105.271	.	1.4e+10	8.7e+11	103.811	8.7e+11	10894.6	8.0e+07	2.5e+11	40.4092	66.6257	0.94464	1.4e+10	62.1	-0.46226	12.9595	1.37498	1254.67	618	6230	28.083	6.14229	3.4489	2.13743	0.053115	0.11911	2.02748	1.98195	1.02297
36	TUR	Turkey	土耳其	2017	D01T02	52.9	27.3	25.6	0.996087	1.3732	0	.	1	.	.	.	.	.	5.06638	10464	106.661	.	1.1e+10	8.6e+11	108.514	8.6e+11	10589.7	8.1e+07	2.6e+11	46.9397	66.7415	0.95978	1.1e+10	65.2	-0.471214	14.5267	1.3732	1379.41	380	8175	29.1317	6.03863	3.91929	2.75372	0.056473	0.139988	2.00157	2.00943	0.996087
36	TUR	Turkey	土耳其	2018	D01T02	60.5	29.4	31.1	0.9838	1.46765	0	.	1	.	.	.	.	.	4.97205	9400.84	107.596	.	1.2e+10	7.8e+11	113.217	7.8e+11	9453.2	8.2e+07	2.3e+11	52.458	66.8674	0.97492	1.3e+10	65.4	-0.476297	16.1905	1.46765	1533.26	310	7156	29.4046	5.77601	4.06889	3.1227	0.069315	0.153298	2.0414	2.07501	0.9838
37	GBR	United Kingdom	英国	1995	D01T02	16.3	9.4	7	1.04283	0.280383	1	.	1	.	.	.	.	.	9.07991	23203.6	239.817	10.9954	2.9e+10	1.3e+12	48.2576	1.3e+12	23123.7	5.8e+07	2.4e+11	37.6563	64.649	1.62124	2.9e+10	77.9	1.60891	.	0.280383	.	8891	18630	24.2674	1.2183	2.71189	6.19592	0.07949	0.136482	2.04577	1.96175	1.04283
37	GBR	United Kingdom	英国	1996	D01T02	8.1	5	3	0.989689	0.275782	1	.	1	.	.	.	.	.	9.3778	24441.9	240.429	11.1613	3.2e+10	1.4e+12	50.0843	1.4e+12	24333.2	5.8e+07	2.6e+11	38.566	64.6428	1.58017	3.2e+10	76.4	1.62767	.	0.275782	2490.55	9821	18184	24.4026	1.06051	2.3252	6.72123	0.082003	0.154647	2.02866	2.0498	0.989689
37	GBR	United Kingdom	英国	1997	D01T02	14.8	9.1	5.7	0.943156	0.271981	1	.	1	.	.	.	.	.	8.98865	26779.8	241.049	11.9357	5.1e+10	1.6e+12	53.2881	1.6e+12	26719.5	5.8e+07	2.7e+11	37.7309	64.6959	1.5391	5.1e+10	76.4	1.64644	.	0.271981	2497.82	10171	17938	23.539	0.936735	2.28012	6.02927	0.080314	0.1628	2.01219	2.13347	0.943156
37	GBR	United Kingdom	英国	1998	D01T02	14.2	8.7	5.5	0.958349	0.25549	1	.	1	.	.	.	.	.	8.99343	28296.8	241.752	12.0276	1.1e+11	1.7e+12	55.5442	1.7e+12	28239	5.8e+07	2.9e+11	36.0362	64.7965	1.55107	1.1e+11	76.5	1.66521	.	0.25549	2694.62	10083	19530	22.9255	0.936431	2.06261	4.14103	0.073573	0.144956	1.96417	2.04953	0.958349
37	GBR	United Kingdom	英国	1999	D01T02	55.5	31.5	24	0.942944	0.251786	1	.	1	.	.	.	.	.	8.90815	28789	242.56	11.5166	1.3e+11	1.7e+12	60.1124	1.7e+12	28665.7	5.9e+07	3.0e+11	35.4937	64.9264	1.62792	1.3e+11	76.2	1.65886	.	0.251786	2853.97	10399	21333	22.5039	0.844515	1.83878	5.5494	0.069944	0.145271	1.94889	2.06681	0.942944
37	GBR	United Kingdom	英国	2000	D01T02	13.6	9.2	4.4	0.946752	0.247124	1	.	1	.	.	.	.	.	9.01452	28289.7	243.428	10.3018	1.6e+11	1.7e+12	58.474	1.7e+12	28156.3	5.9e+07	3.0e+11	37.5599	65.0745	1.61712	1.6e+11	77.3	1.65252	0.089872	0.247124	2894.51	10697	22050	22.5828	0.819785	2.22085	8.31363	0.069845	0.142019	1.92451	2.03276	0.946752
37	GBR	United Kingdom	英国	2001	D01T02	9.1	6.9	2.3	0.953052	0.210286	1	.	1	.	.	.	.	.	9.22302	27888.6	244.367	10.8263	5.6e+10	1.6e+12	59.2685	1.6e+12	27717.6	5.9e+07	2.9e+11	37.5697	65.2256	1.60477	5.6e+10	77.6	1.60134	0.560076	0.210286	3080.69	10658	21423	21.5896	0.762056	2.20907	8.02729	0.070346	0.138555	1.93436	2.02965	0.953052
37	GBR	United Kingdom	英国	2002	D01T02	8.8	6.7	2.1	0.964634	0.217745	1	.	1	.	.	.	.	.	8.94023	30078.6	245.404	10.8489	9.0e+10	1.8e+12	62.5684	1.8e+12	29982.6	5.9e+07	3.2e+11	36.0513	65.4141	1.61497	9.0e+10	78.5	1.55015	2.28534	0.217745	3340.22	10907	20624	21.2343	0.892477	2.04908	8.09048	0.064069	0.12244	1.85159	1.91947	0.964634
37	GBR	United Kingdom	英国	2003	D01T02	14.5	11	3.4	0.96983	0.267433	1	.	1	.	.	.	.	.	9.10409	34480.9	246.549	10.7292	3.6e+10	2.1e+12	62.0686	2.1e+12	34383.9	6.0e+07	3.6e+11	34.2882	65.6192	1.58239	3.6e+10	77.5	1.47348	5.21997	0.267433	3638.09	11198	20426	20.8081	0.849584	2.22918	8.18486	0.074972	0.128849	1.87084	1.92903	0.96983
37	GBR	United Kingdom	英国	2004	D01T02	20.2	11.3	8.9	0.919928	0.246089	1	.	1	.	.	.	.	.	9.05309	40392.3	247.956	9.86697	8.7e+10	2.4e+12	59.3515	2.4e+12	40208.9	6.0e+07	4.2e+11	33.9739	65.817	1.5338	8.7e+10	77.7	1.4877	10.2072	0.246089	3824.26	10776	19178	20.2211	0.729625	2.74306	8.7418	0.06891	0.142531	1.89325	2.05805	0.919928
37	GBR	United Kingdom	英国	2005	D01T02	11.6	7	4.7	0.855798	0.227191	1	.	1	.	.	.	.	.	8.9554	42131.8	249.664	10.0667	2.5e+11	2.5e+12	58.9661	2.5e+12	41932.9	6.0e+07	4.4e+11	36.141	65.9867	1.55279	2.5e+11	79.2	1.40369	16.3929	0.227191	4123.53	10155	17833	20.2467	0.545711	2.83972	9.34668	0.072575	0.163197	1.86612	2.18056	0.855798
37	GBR	United Kingdom	英国	2006	D01T02	11.5	6.6	4.9	0.869192	0.222312	1	.	1	.	.	.	.	.	8.90861	44537.7	251.506	9.54184	2.0e+11	2.7e+12	59.0324	2.7e+12	44472.6	6.1e+07	4.8e+11	39.52	66.0624	1.57317	2.0e+11	80.4	1.52282	21.4017	0.222312	4176.31	8261	17484	20.0905	0.571686	3.09107	9.51967	0.073342	0.16343	1.84514	2.12282	0.869192
37	GBR	United Kingdom	英国	2007	D01T02	19.2	9.1	10.1	0.854343	0.229183	1	.	1	.	.	.	.	.	8.65103	50438.2	253.472	8.43664	2.1e+11	3.1e+12	58.4945	3.1e+12	50444.9	6.1e+07	5.5e+11	35.2805	66.1082	1.61289	2.1e+11	79.9	1.48423	25.4747	0.229183	4111.14	7624	17375	19.6923	0.562236	4.0101	10.2832	0.076955	0.170035	1.87368	2.19313	0.854343
37	GBR	United Kingdom	英国	2008	D01T02	15.3	8.3	7.1	0.857918	0.221639	1	.	1	.	.	.	.	.	8.33782	47432.9	255.475	7.32701	2.5e+11	2.9e+12	56.6439	2.9e+12	47267	6.2e+07	5.1e+11	39.2299	66.1084	1.61272	2.5e+11	79.4	1.43922	28.036	0.221639	4053.93	6856	16523	19.9024	0.672587	4.27586	12.908	0.077173	0.180404	1.82912	2.13204	0.857918
37	GBR	United Kingdom	英国	2009	D01T02	27.6	12.5	15.1	0.843571	0.224887	1	.	1	.	.	.	.	.	7.49069	38820	257.414	10.0699	1.5e+10	2.4e+12	57.9005	2.4e+12	38736.9	6.2e+07	3.9e+11	36.5206	66.0522	1.67125	1.5e+10	79	1.31549	28.7215	0.224887	4076.55	6480	15985	18.5541	0.675051	3.0203	11.0097	0.073403	0.17071	1.79011	2.12206	0.843571
37	GBR	United Kingdom	英国	2010	D01T02	22.2	13.2	9	0.841453	0.233789	1	.	1	.	.	.	.	.	7.6863	39693.2	259.44	8.83241	6.7e+10	2.5e+12	58.9234	2.5e+12	39536.8	6.3e+07	4.0e+11	40.7987	65.9348	1.64564	6.7e+10	76.5	1.39535	30.5154	0.233789	4043.27	6439	15490	18.7965	0.591486	3.77755	12.3741	0.085001	0.190818	1.85889	2.20914	0.841453
37	GBR	United Kingdom	英国	2011	D01T02	59.1	24	35.2	0.833859	0.236278	1	.	1	.	.	.	.	.	7.04395	42150.7	261.476	10.8081	2.7e+10	2.7e+12	59.1459	2.7e+12	42047.6	6.3e+07	4.2e+11	44.7884	65.641	1.64959	2.7e+10	74.5	1.35505	32.5329	0.236278	3926.12	6916	15343	18.3211	0.681825	4.37928	12.6154	0.088692	0.200081	1.82893	2.19333	0.833859
37	GBR	United Kingdom	英国	2012	D01T02	48.9	22.4	26.5	0.837714	0.230857	1	.	1	.	.	.	.	.	7.34347	42485.6	263.3	10.9085	4.7e+10	2.7e+12	59.4021	2.7e+12	42449.1	6.4e+07	4.3e+11	43.6987	65.3413	1.57716	4.7e+10	74.1	1.38782	33.9854	0.230857	3969.86	7865	15370	18.2572	0.630034	3.71703	13.869	0.087575	0.201835	1.85553	2.215	0.837714
37	GBR	United Kingdom	英国	2013	D01T02	71.7	29.3	42.4	0.825432	0.204409	1	.	1	.	.	.	.	.	7.07584	43449.1	265.07	11.434	5.4e+10	2.8e+12	57.0388	2.8e+12	43401.3	6.4e+07	4.4e+11	43.4354	65.0361	1.62028	5.5e+10	74.8	1.41425	35.8305	0.204409	4119.45	7966	14972	18.5699	0.633116	3.25105	11.4223	0.076282	0.20123	1.82435	2.21018	0.825432
37	GBR	United Kingdom	英国	2014	D01T02	100.8	47.3	53.4	0.851403	0.207142	1	.	1	.	.	.	.	.	6.4332	47447.6	267.029	11.5813	5.9e+10	3.1e+12	56.5645	3.1e+12	47452.2	6.5e+07	5.1e+11	39.3054	64.7401	1.6434	5.9e+10	74.9	1.46195	36.635	0.207142	4227.62	7844	15196	18.1704	0.745158	3.51067	10.8953	0.068845	0.171033	1.75767	2.06444	0.851403
37	GBR	United Kingdom	英国	2015	D01T02	92.5	47.3	45.2	0.833346	0.235214	1	.	1	.	.	.	.	.	6.15943	45071.1	269.153	13.1204	4.5e+10	2.9e+12	56.4585	2.9e+12	45039.2	6.5e+07	5.1e+11	37.3656	64.4699	1.64985	4.5e+10	75.8	1.51574	37.8127	0.235214	4319.5	7934	14867	17.9938	0.629464	3.34472	7.02213	0.075773	0.178862	1.78072	2.13683	0.833346
37	GBR	United Kingdom	英国	2016	D01T02	90.1	42.9	47.2	0.855546	0.243601	1	.	1	.	.	.	.	.	5.80403	41146.1	271.201	.	3.2e+11	2.7e+12	58.4256	2.7e+12	41048.4	6.6e+07	4.8e+11	38.8968	64.2519	1.66023	3.3e+11	76.4	1.43465	38.7991	0.243601	4357.93	8183	13876	17.4837	0.573305	3.30367	6.2561	0.085262	0.188014	1.87397	2.19038	0.855546
37	GBR	United Kingdom	英国	2017	D01T02	78.1	41.5	36.5	0.821171	0.20223	1	.	1	.	.	.	.	.	5.55569	40622.7	273.049	.	1.3e+11	2.7e+12	59.9956	2.7e+12	40304.7	6.6e+07	4.8e+11	40.6387	64.0739	1.68022	1.3e+11	76.4	1.38588	39.421	0.20223	4434.97	8771	13301	17.7223	0.59242	3.76092	7.96909	0.076497	0.197871	1.81631	2.21186	0.821171
37	GBR	United Kingdom	英国	2018	D01T02	76.4	41.3	35.2	0.820232	0.190261	1	.	1	.	.	.	.	.	5.42782	43306.3	274.709	.	-25000000000	2.9e+12	61.3829	2.9e+12	42992.8	6.6e+07	5.1e+11	40.5522	63.9261	1.70274	8.1e+10	78	1.33361	40.0209	0.190261	4554.47	8076	12865	17.7605	0.56693	3.80493	9.45873	0.077467	0.209968	1.83431	2.23634	0.820232
38	USA	United States	美国	1995	D01T02	675.7	355.3	320.4	1.1135	1.21334	1	.	1	.	.	.	.	.	19.2169	28690.9	29.073	10.2441	6.9e+10	7.6e+12	79.166	7.6e+12	28690.9	2.7e+08	1.6e+12	17.744	65.3222	2.42019	6.9e+10	76.7	1.38012	.	1.21334	.	104180	123962	.	.	2.62197	1.89191	0.096931	0.07773	2.49011	2.2363	1.1135
38	USA	United States	美国	1996	D01T02	677.9	374	303.9	1.17496	1.21127	1	.	1	.	.	.	.	.	19.5754	29967.7	29.4132	10.1748	9.8e+10	8.1e+12	78.7965	8.1e+12	29967.7	2.7e+08	1.7e+12	17.9249	65.3418	2.45001	9.8e+10	76.7	1.41229	.	1.21127	3140.33	105054	106892	.	.	2.17801	2.07125	0.093618	0.06941	2.46202	2.09541	1.17496
38	USA	United States	美国	1997	D01T02	1011.4	576	435.4	1.12137	1.24664	1	.	1	.	.	.	.	.	20.3309	31459.1	29.7694	9.42468	1.2e+11	8.6e+12	75.306	8.6e+12	31459.1	2.7e+08	1.9e+12	18.5158	65.4482	2.47983	1.2e+11	75.6	1.44445	.	1.24664	3242.75	101282	119214	23.1321	1.33691	2.11691	1.91676	0.101128	0.076373	2.4059	2.1455	1.12137
38	USA	United States	美国	1998	D01T02	638.3	356	282.3	1.11648	1.10294	1	.	1	.	.	.	.	.	20.2663	32853.7	30.1185	9.79913	2.1e+11	9.1e+12	71.8155	9.1e+12	32853.7	2.8e+08	2.0e+12	17.9469	65.6105	2.50401	2.1e+11	75.4	1.47662	0.255914	1.10294	3407.7	102246	134733	22.6706	1.214	1.90405	1.56888	0.088252	0.07122	2.41236	2.16069	1.11648
38	USA	United States	美国	1999	D01T02	530.6	289.9	240.7	1.09761	1.08176	1	.	1	.	.	.	.	.	20.1011	34515.4	30.4663	10.3547	3.1e+11	9.6e+12	72.7102	9.6e+12	34513.6	2.8e+08	2.2e+12	18.2255	65.7885	2.54965	3.1e+11	75.5	1.50569	0.986557	1.08176	3465.03	116512	149251	22.5586	1.15124	1.76567	1.52519	0.082547	0.074196	2.38216	2.17032	1.09761
38	USA	United States	美国	2000	D01T02	859.9	443.7	416.2	1.09203	1.15492	1	.	1	.	.	.	.	.	20.4698	36330	30.7973	10.2971	3.5e+11	1.0e+13	74.031	1.0e+13	36334.9	2.8e+08	2.4e+12	19.9098	65.9634	2.62879	3.5e+11	76.4	1.53477	2.50351	1.15492	3495.46	131100	164795	22.4516	1.15056	1.86989	1.84679	0.08651	0.078712	2.31819	2.12283	1.09203
38	USA	United States	美国	2001	D01T02	1025.8	530.1	495.7	1.07913	1.21901	1	.	1	.	.	.	.	.	20.1715	37133.6	31.1036	10.2109	1.7e+11	1.1e+13	75.3518	1.1e+13	37133.2	2.9e+08	2.4e+12	18.0336	66.1576	2.6483	1.7e+11	79.1	1.46602	4.48131	1.21901	3566.03	148958	177513	21.469	1.12926	1.91206	1.88077	0.08289	0.071216	2.28977	2.12187	1.07913
38	USA	United States	美国	2002	D01T02	1157.5	596.9	560.6	1.06368	1.27962	1	.	1	.	.	.	.	.	19.4455	37997.8	31.3935	10.5133	1.1e+11	1.1e+13	76.6725	1.1e+13	38023.2	2.9e+08	2.4e+12	17.3122	66.3122	2.55926	1.1e+11	78.4	1.39728	6.89493	1.27962	3650.92	150200	184245	20.6525	0.973712	1.9117	1.83394	0.086742	0.075185	2.27642	2.14015	1.06368
38	USA	United States	美国	2003	D01T02	2453	1194.6	1258.4	1.09908	1.4199	1	.	1	.	.	.	.	.	19.5065	39490.3	31.6645	10.3429	1.2e+11	1.1e+13	77.9933	1.2e+13	39496.5	2.9e+08	2.5e+12	17.6975	66.4541	2.56455	1.2e+11	78.2	1.3283	9.53054	1.4199	3892.27	153500	188941	20.7395	1.12105	2.01324	2.10931	0.087859	0.073335	2.28564	2.07959	1.09908
38	USA	United States	美国	2004	D01T02	3497.6	1442.1	2055.6	1.12229	1.43286	1	.	1	.	.	.	.	.	19.5976	41724.6	31.9589	10.4077	2.1e+11	1.2e+13	79.3141	1.2e+13	41712.8	2.9e+08	2.7e+12	19.1633	66.6175	2.50243	2.1e+11	78.7	1.28275	12.7072	1.43286	3786.54	167407	189536	20.95	1.26548	2.39015	2.57065	0.084907	0.074864	2.25897	2.01283	1.12229
38	USA	United States	美国	2005	D01T02	2995.3	1055.5	1939.8	1.09964	1.266	1	.	1	.	.	.	.	.	19.4693	44123.4	32.2549	10.3546	1.4e+11	1.3e+13	80.6348	1.3e+13	44114.7	3.0e+08	3.0e+12	20.203	66.8072	2.51697	1.4e+11	79.9	1.24417	17.2335	1.266	3739.74	182866	207867	21.2063	1.15051	2.7858	3.31136	0.081667	0.084943	2.28398	2.07703	1.09964
38	USA	United States	美国	2006	D01T02	3492.5	1142.4	2350	1.06367	1.26088	1	.	1	.	.	.	.	.	18.9459	46302	32.5674	10.6284	3.0e+11	1.4e+13	81.6463	1.4e+13	46298.7	3.0e+08	3.2e+12	21.3111	66.8016	2.55764	3.0e+11	81.2	1.29692	20.0958	1.26088	3802.87	204182	221784	21.587	1.00949	3.52056	3.73722	0.090667	0.092886	2.28056	2.14405	1.06367
38	USA	United States	美国	2007	D01T02	4879.9	1460.6	3419.3	1.05587	1.41946	1	.	1	.	.	.	.	.	19.0429	48050.2	32.8786	10.5969	3.5e+11	1.4e+13	82.6577	1.5e+13	47976	3.0e+08	3.2e+12	21.9252	66.8382	2.63161	3.5e+11	81.2	1.2736	23.6847	1.41946	3777.51	214807	241347	21.4239	1.07512	3.73865	3.96254	0.103408	0.095442	2.29366	2.17229	1.05587
38	USA	United States	美国	2008	D01T02	9841	2951.4	6889.6	1.02819	1.60515	1	.	1	.	.	.	.	.	18.2785	48570	33.2437	10.9475	3.4e+11	1.5e+13	83.6692	1.5e+13	48382.6	3.0e+08	3.1e+12	23.496	66.88	2.76791	3.4e+11	81	1.32768	25.231	1.60515	3932.78	224733	231588	20.7935	1.053	3.96872	6.48429	0.12847	0.112449	2.31948	2.25589	1.02819
38	USA	United States	美国	2009	D01T02	9655.9	2958.9	6697	1.04966	1.42861	1	.	1	.	.	.	.	.	16.8087	47194.9	33.5364	11.5601	1.6e+11	1.4e+13	84.6806	1.5e+13	47100	3.1e+08	2.7e+12	18.4189	66.8781	2.8127	1.6e+11	80.7	1.22437	25.9283	1.42861	4088.93	231194	224912	19.2685	0.960286	3.39369	5.80419	0.111885	0.091709	2.32148	2.21165	1.04966
38	USA	United States	美国	2010	D01T02	13312.8	4108.5	9204.2	1.05859	1.44682	1	.	1	.	.	.	.	.	17.4317	48650.6	33.8158	11.3372	2.6e+11	1.5e+13	85.6921	1.5e+13	48466.7	3.1e+08	2.8e+12	21.6627	66.8134	2.7354	2.6e+11	78	1.24755	27.1615	1.44682	3883.23	248249	241977	19.3103	1.02944	3.95874	7.18457	0.122794	0.099792	2.34318	2.2135	1.05859
38	USA	United States	美国	2011	D01T02	16073.4	4780.4	11293	1.08303	1.42076	1	.	1	.	.	.	.	.	16.6042	50066	34.0624	11.5679	2.6e+11	1.6e+13	86.7035	1.6e+13	49882.6	3.1e+08	2.9e+12	24.1178	66.7246	2.76525	2.6e+11	77.8	1.2613	28.1375	1.42076	4025.4	255832	247750	19.4075	1.20056	4.02266	9.92433	0.129058	0.106996	2.3947	2.21112	1.08303
38	USA	United States	美国	2012	D01T02	18640.9	5458.7	13182.2	1.0987	1.3625	1	.	1	.	.	.	.	.	15.7898	51784.4	34.3132	11.4476	2.5e+11	1.6e+13	87.715	1.6e+13	51602.9	3.1e+08	3.2e+12	23.9688	66.6154	2.68166	2.5e+11	76.3	1.27705	29.2164	1.3625	3989.56	274033	268782	19.1626	1.14933	3.50845	10.0637	0.129642	0.10446	2.50201	2.27725	1.0987
38	USA	United States	美国	2013	D01T02	18109.2	4704.5	13404.7	1.10009	1.2975	1	.	1	.	.	.	.	.	16.1112	53291.1	34.5518	11.685	2.9e+11	1.7e+13	88.7264	1.7e+13	53106.5	3.2e+08	3.3e+12	23.2868	66.4779	2.70972	2.9e+11	76	1.23471	30.0687	1.2975	4090.93	283781	287831	19.2416	1.32108	3.21071	10.764	0.116009	0.09224	2.37924	2.16277	1.10009
38	USA	United States	美国	2014	D01T02	18679.2	4496.7	14182.4	1.0884	1.32577	1	.	1	.	.	.	.	.	16.0409	55123.8	34.8061	11.6809	2.5e+11	1.8e+13	88.6269	1.8e+13	55050	3.2e+08	3.6e+12	23.0104	66.3161	2.71924	2.5e+11	75.5	1.23153	30.3726	1.32577	4205.87	293706	285096	19.3315	1.17207	3.06248	10.9857	0.122018	0.097384	2.46174	2.26179	1.0884
38	USA	United States	美国	2015	D01T02	13762.7	2986.4	10776.3	1.0692	1.11825	1	.	1	.	.	.	.	.	15.56	56762.7	35.0633	11.8743	5.1e+11	1.8e+13	88.8894	1.8e+13	56863.4	3.2e+08	3.7e+12	20.9333	66.1334	2.71742	5.1e+11	76.2	1.2501	31.4878	1.11825	4269.87	301075	288335	18.5871	1.03393	2.80884	8.00342	0.107517	0.089992	2.38666	2.23219	1.0692
38	USA	United States	美国	2016	D01T02	15351.8	3527.5	11824.2	1.06092	1.2281	1	.	1	.	.	.	.	.	15.1499	57866.7	35.3183	.	4.7e+11	1.9e+13	88.8351	1.9e+13	58021.4	3.2e+08	3.8e+12	19.7447	65.943	2.76145	4.7e+11	75.4	1.24616	32.3077	1.2281	4251.16	310244	295327	18.0422	0.942645	2.6013	7.57865	0.115019	0.090247	2.38397	2.24707	1.06092
38	USA	United States	美国	2017	D01T02	15061.3	3689	11372.3	1.05603	1.17383	1	.	1	.	.	.	.	.	14.8233	59907.8	35.5425	.	3.8e+11	2.0e+13	88.1674	2.0e+13	60109.7	3.3e+08	4.0e+12	20.2362	65.7221	2.81741	3.8e+11	75.1	1.2656	32.8086	1.17383	4411.7	313052	293904	18.4354	0.946869	2.74624	10.5105	0.112167	0.093153	2.3735	2.24756	1.05603
38	USA	United States	美国	2018	D01T02	9153.2	2366.1	6787.1	1.0534	1.09774	1	.	1	.	.	.	.	.	15.2225	62823.3	35.7301	.	2.1e+11	2.1e+13	88.2992	2.1e+13	63064.4	3.3e+08	4.3e+12	20.756	65.4833	2.83283	2.1e+11	75.7	1.24137	33.3462	1.09774	4748.84	312046	285095	18.6309	0.903901	2.95741	13.53	0.108271	0.094904	2.3632	2.24341	1.0534
39	ARG	Argenti0	阿根廷	1995	D01T02	54.3	28.6	25.7	1.35947	5.41275	0	.	1	.	.	.	.	.	3.23047	7383.7	12.7695	6.93659	5.6e+09	2.6e+11	41.3476	2.6e+11	7408.71	3.5e+07	4.6e+10	15.924	60.9832	0.41539	5.6e+09	68	0.206966	.	5.41275	.	3588	676	26.3012	5.35146	1.63192	10.3399	0.085067	0.022058	2.09345	1.5399	1.35947
39	ARG	Argenti0	阿根廷	1996	D01T02	45.4	25.3	20.1	1.358	5.53102	0	.	1	.	.	.	.	.	3.46291	7690.16	12.9314	6.43294	6.9e+09	2.7e+11	43.2187	2.7e+11	7721.35	3.5e+07	4.9e+10	17.4805	61.1358	0.41749	7.0e+09	74.7	0.193814	.	5.53102	.	4012	1097	26.5926	5.61087	1.16623	12.969	0.094918	0.025711	2.10312	1.54869	1.358
39	ARG	Argenti0	阿根廷	1997	D01T02	8.5	5.5	3.1	1.31745	4.74254	0	.	1	.	.	.	.	.	3.52142	8176.77	13.0873	7.23891	9.2e+09	2.9e+11	45.0897	2.9e+11	8213.13	3.6e+07	5.7e+10	19.4018	61.2915	0.41959	9.2e+09	73.3	0.180661	.	4.74254	695.619	5035	824	27.1792	5.22197	1.54525	11.6986	0.089915	0.029468	2.04719	1.55391	1.31745
39	ARG	Argenti0	阿根廷	1998	D01T02	72.7	40.6	32	1.35189	5.53148	0	.	1	.	.	.	.	.	3.66165	8250.67	13.2398	6.76079	7.3e+09	3.0e+11	46.9607	3.0e+11	8289.51	3.6e+07	6.0e+10	19.3495	61.4496	0.41131	7.3e+09	70.9	0.167508	.	5.53148	704.841	5459	861	26.7121	5.25272	2.72641	8.61176	0.092821	0.027333	2.08231	1.54029	1.35189
39	ARG	Argenti0	阿根廷	1999	D01T02	178.7	96.1	82.7	1.36134	5.80951	0	.	1	.	.	.	.	.	3.6697	7735.32	13.3932	5.71231	2.4e+10	2.8e+11	48.8317	2.8e+11	7774.74	3.6e+07	5.1e+10	17.2265	61.6206	0.45337	2.4e+10	70.6	0.122511	.	5.80951	713.079	5558	899	26.1936	4.45783	3.27441	12.1168	0.088095	0.023517	2.06084	1.51383	1.36134
39	ARG	Argenti0	阿根廷	2000	D01T02	564.5	285.8	278.7	1.36735	6.4358	0	.	1	.	.	.	.	.	3.56799	7666.52	13.5458	6.0314	1.0e+10	2.8e+11	53.9648	2.8e+11	7708.1	3.7e+07	4.6e+10	18.119	61.8092	0.43884	1.0e+10	70	0.077514	.	6.4358	716.556	5574	1062	25.9908	4.67991	2.9526	17.6242	0.098538	0.024305	2.0742	1.51695	1.36735
39	ARG	Argenti0	阿根廷	2001	D01T02	729.6	374.2	355.3	1.37491	6.36984	0	.	1	.	.	.	.	.	3.34195	7168.98	13.6956	7.74526	2.2e+09	2.7e+11	59.0116	2.7e+11	7208.37	3.7e+07	3.8e+10	17.4409	62.0204	0.42461	2.2e+09	68.6	-0.206655	0.250797	6.36984	688.278	5088	691	25.2434	4.56859	3.05271	17.0272	0.100773	0.021799	2.07897	1.51208	1.37491
39	ARG	Argenti0	阿根廷	2002	D01T02	592.6	308.3	284.3	1.34699	6.5857	0	.	1	.	.	.	.	.	3.10057	2579.49	13.8434	7.41158	2.1e+09	9.8e+10	62.7487	9.8e+10	2593.4	3.8e+07	1.2e+10	35.4468	62.2134	0.38886	2.2e+09	65.7	-0.490824	0.390656	6.5857	692.192	4143	718	30.5577	10.2066	3.86643	17.0062	0.219773	0.042163	2.30337	1.71001	1.34699
39	ARG	Argenti0	阿根廷	2003	D01T02	1004.6	493.5	511.1	1.34278	6.25977	0	.	1	.	.	.	.	.	3.33496	3333.15	13.987	7.4255	1.7e+09	1.3e+11	65.1763	1.3e+11	3349.81	3.8e+07	1.9e+10	34.016	62.4021	0.41013	1.7e+09	56.3	-0.336338	0.676231	6.25977	718.523	3765	792	32.6451	10.3282	3.00519	17.0831	0.200118	0.045555	2.33983	1.74252	1.34278
39	ARG	Argenti0	阿根廷	2004	D01T02	977.3	410.3	567	1.2539	6.47711	0	.	1	.	.	.	.	.	3.65607	4258.16	14.1298	6.43984	4.1e+09	1.6e+11	65.4854	1.7e+11	4277.72	3.8e+07	2.6e+10	34.63	62.6053	0.40376	4.1e+09	53.9	-0.375268	1.40392	6.47711	765.64	3816	786	28.8169	8.36249	3.91732	16.0003	0.198584	0.066152	2.43805	1.94437	1.2539
39	ARG	Argenti0	阿根廷	2005	D01T02	1399.6	511.2	888.4	1.32707	6.64116	0	.	1	.	.	.	.	.	3.73663	5086.63	14.2766	6.42424	5.3e+09	2.0e+11	63.9667	2.0e+11	5109.85	3.9e+07	3.5e+10	34.7394	62.8286	0.42074	5.3e+09	51.7	-0.231328	2.37192	6.64116	819.378	4215	1054	28.6263	7.93875	3.2154	16.3961	0.204686	0.059489	2.33356	1.75843	1.32707
39	ARG	Argenti0	阿根廷	2006	D01T02	1457.1	498.9	958.1	1.28259	6.48947	0	.	1	.	.	.	.	.	3.92391	5890.98	14.425	6.77059	5.5e+09	2.3e+11	66.9647	2.3e+11	5919.01	3.9e+07	4.3e+10	34.7003	62.9923	0.45216	5.5e+09	53.4	-0.198307	4.01175	6.48947	891.833	4597	1020	29.2033	6.93557	4.22283	15.2633	0.22005	0.068347	2.31712	1.8066	1.28259
39	ARG	Argenti0	阿根廷	2007	D01T02	2055.3	643.2	1412.2	1.31566	6.09093	0	.	1	.	.	.	.	.	4.0828	7210.6	14.5709	5.77487	6.5e+09	2.9e+11	66.4116	2.9e+11	7245.45	4.0e+07	5.6e+10	34.9476	63.1998	0.46007	6.5e+09	54	-0.178098	6.52019	6.09093	974.718	4806	937	27.4152	7.45235	3.81561	10.9263	0.208517	0.066047	2.37323	1.80383	1.31566
39	ARG	Argenti0	阿根廷	2008	D01T02	3261.3	991.3	2270	1.32578	5.65944	0	.	1	.	.	.	.	.	4.15221	8977.51	14.7162	5.42888	9.7e+09	3.6e+11	68.057	3.6e+11	9020.87	4.0e+07	6.9e+10	35.2585	63.4238	0.47055	9.7e+09	54.2	-0.287141	7.73392	5.65944	1036	4781	801	26.2725	7.31895	3.20115	9.37098	0.212151	0.067616	2.39148	1.80382	1.32578
39	ARG	Argenti0	阿根廷	2009	D01T02	1578.8	488.1	1090.7	1.21605	5.20374	0	.	1	.	.	.	.	.	3.84832	8184.39	14.8663	6.18534	4.0e+09	3.3e+11	70.2065	3.3e+11	8225.14	4.0e+07	5.2e+10	28.3678	63.6213	0.58398	4.0e+09	52.3	-0.372689	8.62992	5.20374	1035.63	4336	640	25.2842	5.27362	3.75718	10.1652	0.204761	0.071356	2.35377	1.93559	1.21605
39	ARG	Argenti0	阿根廷	2010	D01T02	3489.8	1077.6	2412.2	1.33799	5.47566	0	.	1	.	.	.	.	.	4.09981	10386	14.9043	5.68327	1.1e+10	4.2e+11	73.2314	4.2e+11	10386	4.1e+07	7.1e+10	29.5023	63.769	0.56104	1.1e+10	51.2	-0.266708	9.80104	5.47566	1123.83	4165	552	25.2588	7.13217	4.29138	7.90318	0.181201	0.055046	2.35327	1.75881	1.33799
39	ARG	Argenti0	阿根廷	2011	D01T02	3531.9	1060.7	2471.2	1.33915	5.26344	0	.	1	.	.	.	.	.	4.28094	12848.7	15.0772	5.85904	1.1e+10	5.3e+11	76.2974	5.3e+11	12848.9	4.1e+07	9.1e+10	29.8719	63.8807	0.56597	1.1e+10	51.7	-0.210897	11.0114	5.26344	1180.67	4133	688	25.2127	6.99873	3.93877	5.97247	0.180869	0.057297	2.3521	1.75641	1.33915
39	ARG	Argenti0	阿根廷	2012	D01T02	2405.1	711.3	1693.8	1.27736	5.25487	0	.	1	.	.	.	.	.	4.26422	13082.7	15.2495	5.57056	1.5e+10	5.5e+11	77.4463	5.5e+11	13082.7	4.2e+07	8.7e+10	27.099	63.9471	0.63491	1.5e+10	48	-0.315394	12.2724	5.25487	1203.37	4078	735	24.4291	5.78174	4.06074	6.22847	0.171255	0.057887	2.34281	1.8341	1.27736
39	ARG	Argenti0	阿根廷	2013	D01T02	2224.7	585.5	1639.2	1.28875	5.11017	0	.	1	.	.	.	.	.	4.34212	13080.3	15.4212	5.67143	9.8e+09	5.5e+11	78.2239	5.5e+11	13080.3	4.2e+07	9.0e+10	27.246	63.9827	0.61849	9.8e+09	46.7	-0.338744	14.7471	5.11017	1198.26	4129	643	24.0059	6.05292	3.17809	4.68211	0.153351	0.054076	2.32828	1.80662	1.28875
39	ARG	Argenti0	阿根廷	2014	D01T02	2711.3	652	2059.3	1.3484	5.01952	0	.	1	.	.	.	.	.	4.20905	12334.8	15.5916	5.5015	5.1e+09	5.3e+11	80.9958	5.3e+11	12334.8	4.3e+07	8.4e+10	25.4864	64.0155	0.59396	5.1e+09	44.6	-0.386808	15.2238	5.01952	1206.94	4173	509	24.2774	6.7127	3.26438	4.67799	0.147501	0.047565	2.35675	1.74781	1.3484
39	ARG	Argenti0	阿根廷	2015	D01T02	2392.8	506.3	1886.5	1.2896	4.75541	0	.	1	.	.	.	.	.	4.30185	13789.1	15.7606	.	1.2e+10	5.9e+11	84.002	6.0e+11	13789.1	4.3e+07	9.3e+10	19.6703	64.06	0.62262	1.2e+10	44.1	-0.312958	15.8491	4.75541	1230.54	3579	546	23.1531	5.15669	2.74932	2.53859	0.126539	0.047053	2.34194	1.81603	1.2896
39	ARG	Argenti0	阿根廷	2016	D01T02	1971.8	449.8	1522	1.35254	4.8355	0	.	1	.	.	.	.	.	4.2018	12790.3	15.9281	.	3.3e+09	5.6e+11	87.2134	5.6e+11	12790.2	4.4e+07	8.0e+10	20.4046	64.0606	0.55815	3.3e+09	43.8	-0.047992	16.6063	4.8355	1259.64	2925	884	22.0541	6.26457	3.21487	2.49627	0.136543	0.042042	2.32886	1.72184	1.35254
39	ARG	Argenti0	阿根廷	2017	D01T02	1710.6	421.6	1289	1.28685	4.61162	0	.	1	.	.	.	.	.	4.0714	14613	16.0942	.	1.2e+10	6.4e+11	89.9585	6.4e+11	14613	4.4e+07	9.8e+10	19.5114	64.0835	0.55712	1.2e+10	50.4	0.008894	17.8024	4.61162	1210.46	3050	393	21.7821	5.23162	3.19026	2.785	0.121572	0.045884	2.27694	1.7694	1.28685
39	ARG	Argenti0	阿根廷	2018	D01T02	581.4	154.7	426.8	1.26057	4.7751	0	.	1	.	.	.	.	.	3.97567	11795.2	16.2585	.	1.2e+10	5.2e+11	91.6006	5.2e+11	11633.5	4.4e+07	7.6e+10	24.5859	64.1213	0.4936	1.2e+10	52.3	0.007446	19.079	4.7751	1224.18	3242	425	23.7196	4.53788	0.475469	4.11937	0.142934	0.056097	2.26592	1.79753	1.26057
40	BRA	Brazil	巴西	1995	D01T02	34.1	22.1	12	1.31041	2.55407	0	.	1	.	.	.	.	.	1.4756	4704.96	19.5636	13.023	4.9e+09	7.7e+11	11.9439	7.7e+11	4748.22	1.6e+08	1.6e+11	13.0823	62.4887	0.97516	4.9e+09	51.4	-0.029592	.	2.55407	.	4741	2707	23.3815	5.01167	10.2856	0.88301	0.080419	0.037209	2.1252	1.62179	1.31041
40	BRA	Brazil	巴西	1996	D01T02	54.6	35.5	19.1	1.31923	2.73167	0	.	1	.	.	.	.	.	1.58045	5121.91	19.8653	12.7984	1.3e+10	8.5e+11	12.979	8.5e+11	5166.16	1.7e+08	1.6e+11	12.3148	62.9129	0.98963	1.3e+10	48.1	-0.010731	.	2.73167	.	5446	2611	22.3401	4.76841	10.0435	0.881497	0.080246	0.04103	2.12596	1.61151	1.31923
40	BRA	Brazil	巴西	1997	D01T02	130.8	79.1	51.7	1.36024	3.48664	0	.	1	.	.	.	.	.	1.66918	5240.13	20.1656	12.9406	1.9e+10	8.8e+11	14.014	8.8e+11	5282.01	1.7e+08	1.7e+11	13.274	63.3817	1.0041	1.9e+10	52.6	0.00813	.	3.48664	.	13479	2756	22.5941	4.68505	9.47166	0.601043	0.098464	0.048196	2.22482	1.63561	1.36024
40	BRA	Brazil	巴西	1998	D01T02	234.4	131.9	102.4	1.34233	3.64492	0	.	1	.	.	.	.	.	1.69894	5049.77	20.4639	13.1583	2.9e+10	8.6e+11	15.0491	8.6e+11	5087.15	1.7e+08	1.6e+11	12.943	63.8733	1.01857	2.9e+10	52.3	0.026992	0.000585	3.64492	.	13546	2491	22.1188	4.75004	10.0119	0.690671	0.095157	0.046984	2.16382	1.61199	1.34233
40	BRA	Brazil	巴西	1999	D01T02	155.9	84.5	71.4	1.28534	3.59701	0	.	1	.	.	.	.	.	1.73477	3456.42	20.7566	12.8784	2.8e+10	6.0e+11	16.0842	6.0e+11	3478.37	1.7e+08	1.0e+11	16.647	64.3556	1.03304	2.8e+10	61.3	0.078151	0.004035	3.59701	.	14693	2816	21.7467	4.64598	10.1705	0.841946	0.115132	0.06378	2.1181	1.64788	1.28534
40	BRA	Brazil	巴西	2000	D01T02	322.2	163.2	159	1.34447	3.27726	0	.	1	.	.	.	.	.	1.7835	3726.81	21.0422	13.7123	3.3e+10	6.6e+11	17.1192	6.6e+11	3749.75	1.8e+08	1.2e+11	17.3571	64.8126	1.04751	3.3e+10	61.1	0.12931	0.056859	3.27726	295.235	14104	3179	23.0066	4.75046	10.1135	1.64799	0.10267	0.062865	2.25917	1.68034	1.34447
40	BRA	Brazil	巴西	2001	D01T02	430.5	221	209.5	1.30876	3.71055	0	.	1	.	.	.	.	.	1.79211	3142.24	21.322	12.957	2.3e+10	5.6e+11	18.1543	5.6e+11	3156.8	1.8e+08	1.0e+11	20.8571	65.1711	1.06198	2.3e+10	61.9	0.148315	0.185734	3.71055	337.399	14410	3439	22.6395	4.80104	8.59153	3.59	0.132943	0.07539	2.25812	1.72539	1.30876
40	BRA	Brazil	巴西	2002	D01T02	803.2	418.5	384.7	1.35502	3.74411	0	.	1	.	.	.	.	.	1.76065	2824.72	21.5929	13.2459	1.7e+10	5.1e+11	20.6957	5.1e+11	2829.28	1.8e+08	9.1e+10	21.687	65.5403	1.00968	1.7e+10	61.5	0.167321	0.405038	3.74411	398.412	13204	3481	22.4953	5.47527	8.74037	4.88299	0.137948	0.069809	2.2882	1.68869	1.35502
40	BRA	Brazil	巴西	2003	D01T02	1113.1	548.4	564.8	1.32481	4.00562	0	.	1	.	.	.	.	.	1.70185	3056.65	21.8505	13.7598	1.0e+10	5.6e+11	23.217	5.6e+11	3070.91	1.8e+08	9.3e+10	22.2245	65.9095	0.99939	1.0e+10	63.4	0.120753	0.529078	4.00562	423.245	12545	3866	23.0838	6.16718	8.5333	5.18582	0.137092	0.06347	2.28613	1.72562	1.32481
40	BRA	Brazil	巴西	2004	D01T02	1310.5	553.7	756.8	1.25891	4.41181	0	.	1	.	.	.	.	.	1.77844	3623.22	22.1009	13.2391	1.8e+10	6.7e+11	24.4912	6.7e+11	3637.46	1.8e+08	1.2e+11	24.3698	66.2733	0.96343	1.8e+10	62	-0.029331	1.70931	4.41181	483.03	12669	4044	24.3066	5.66531	8.93935	4.57387	0.156387	0.079624	2.31306	1.83736	1.25891
40	BRA	Brazil	巴西	2005	D01T02	1613.1	590.9	1022.2	1.25988	3.70893	0	.	1	.	.	.	.	.	1.77566	4773.27	22.3492	13.3374	1.5e+10	8.9e+11	25.9896	8.9e+11	4790.44	1.9e+08	1.5e+11	21.9998	66.6328	1.00246	1.6e+10	61.7	-0.072202	1.73118	3.70893	509.015	14444	4054	24.1726	4.65117	10.004	5.99045	0.141452	0.072972	2.4028	1.90718	1.25988
40	BRA	Brazil	巴西	2006	D01T02	2283.8	784.6	1499.2	1.29814	3.60589	0	.	1	.	.	.	.	.	1.77748	5866.02	22.5912	13.721	1.9e+10	1.1e+12	28.3882	1.1e+12	5886.46	1.9e+08	1.9e+11	21.0939	67.0055	0.98807	1.9e+10	60.9	-0.103798	2.52462	3.60589	543.236	15886	3956	23.544	4.37004	11.5153	7.6849	0.138941	0.069601	2.42157	1.86542	1.29814
40	BRA	Brazil	巴西	2007	D01T02	2941	921.5	2019.5	1.29293	3.81422	0	.	1	.	.	.	.	.	1.84798	7323.19	22.8256	13.5626	4.5e+10	1.4e+12	30.7867	1.4e+12	7348.03	1.9e+08	2.5e+11	20.5638	67.3584	1.08138	4.5e+10	56.2	-0.084421	3.98861	3.81422	555.129	17469	4194	23.1254	4.41692	11.8242	8.3201	0.138225	0.073011	2.39177	1.84988	1.29293
40	BRA	Brazil	巴西	2008	D01T02	6135.2	1868.3	4266.9	1.19919	4.00233	0	.	1	.	.	.	.	.	1.93921	8801.76	23.0521	12.9094	5.1e+10	1.7e+12	35.5621	1.7e+12	8831.02	1.9e+08	3.3e+11	22.4268	67.6977	1.12904	5.1e+10	56.2	-0.014441	5.19894	4.00233	590.714	18890	4280	23.0853	4.56785	12.9311	9.54679	0.140101	0.086735	2.22918	1.8589	1.19919
40	BRA	Brazil	巴西	2009	D01T02	5891.5	1818.7	4072.8	1.27384	4.96843	0	.	1	.	.	.	.	.	1.79933	8569.9	23.2728	13.7955	3.1e+10	1.7e+12	37.0384	1.7e+12	8597.92	1.9e+08	3.2e+11	17.1967	68.031	1.11866	3.2e+10	56.7	0.077861	6.0303	4.96843	625.521	18135	4271	21.8786	4.47677	12.5107	8.99748	0.141824	0.063969	2.2406	1.75893	1.27384
40	BRA	Brazil	巴西	2010	D01T02	6919	2136.1	4782.9	1.22807	4.08356	0	.	1	.	.	.	.	.	2.02661	11249.3	23.4925	12.7004	8.2e+10	2.2e+12	40.2491	2.2e+12	11286.2	2.0e+08	4.5e+11	17.8124	68.3558	1.15992	8.2e+10	55.6	0.132048	7.18138	4.08356	686.125	20771	4228	23.268	4.11576	18.1365	9.90018	0.12841	0.07279	2.22173	1.80913	1.22807
40	BRA	Brazil	巴西	2011	D01T02	12562.9	3768.7	8794.2	1.22695	4.51777	0	.	1	.	.	.	.	.	2.11068	13200.6	23.7117	13.4916	1.0e+11	2.6e+12	43.4598	2.6e+12	13245.6	2.0e+08	5.4e+11	18.8443	68.6543	1.13966	1.0e+11	56.3	0.105576	8.99817	4.51777	737.718	23954	4695	23.1021	4.34203	20.1071	10.5615	0.148775	0.080513	2.26389	1.84514	1.22695
40	BRA	Brazil	巴西	2012	D01T02	12673.6	3741.2	8932.4	1.20248	5.02649	0	.	1	.	.	.	.	.	2.27142	12327.5	23.9261	12.6507	9.3e+10	2.5e+12	45.1775	2.5e+12	12370	2.0e+08	5.1e+11	19.3079	68.9277	1.12684	9.3e+10	57.9	0.063812	9.56089	5.02649	788.49	25637	4798	22.1336	4.16833	16.3041	11.0242	0.162657	0.091941	2.29667	1.90994	1.20248
40	BRA	Brazil	巴西	2013	D01T02	16185.7	4249.3	11936.4	1.22096	5.75726	0	.	1	.	.	.	.	.	2.41345	12258.6	24.1348	11.4981	7.5e+10	2.5e+12	47.0574	2.5e+12	12300.3	2.0e+08	5.2e+11	19.9203	69.1753	1.19567	7.5e+10	57.7	-0.004247	10.5892	5.75726	838.472	25925	4959	21.2248	4.50689	17.558	7.66385	0.171008	0.092553	2.27128	1.86024	1.22096
40	BRA	Brazil	巴西	2014	D01T02	16822.5	4020.9	12801.5	1.20444	5.83957	0	.	1	.	.	.	.	.	2.51459	12071.4	24.3427	10.8091	8.8e+10	2.5e+12	50.1764	2.5e+12	12112.6	2.0e+08	4.9e+11	18.903	69.3906	1.27131	8.8e+10	56.9	-0.034038	11.7804	5.83957	887.678	25683	4659	20.4725	4.32561	15.4956	9.34729	0.173944	0.09493	2.28586	1.89786	1.20444
40	BRA	Brazil	巴西	2015	D01T02	15501.1	3249.1	12252.1	1.20046	6.66965	0	.	1	.	.	.	.	.	2.36536	8783.21	24.5495	.	6.5e+10	1.8e+12	51.32	1.8e+12	8814	2.1e+08	3.2e+11	20.5428	69.5661	1.34264	6.5e+10	56.6	-0.132153	12.4191	6.66965	.	25578	4641	19.36	4.31915	12.1341	7.36062	0.215341	0.102224	2.36055	1.96637	1.20046
40	BRA	Brazil	巴西	2016	D01T02	13935.4	3146.5	10789	1.20699	6.23282	0	.	1	.	.	.	.	.	2.16126	8680.74	24.7495	.	7.4e+10	1.8e+12	50.7345	1.8e+12	8710.1	2.1e+08	2.8e+11	18.3017	69.6488	1.26343	7.4e+10	56.5	-0.141066	12.985	6.23282	.	22810	5200	18.3548	4.89135	11.7958	6.45093	0.181046	0.083317	2.25085	1.86484	1.20699
40	BRA	Brazil	巴西	2017	D01T02	19886.9	4831.4	15055.5	1.19504	6.60191	0	.	1	.	.	.	.	.	2.18937	9896.72	24.9463	.	6.9e+10	2.1e+12	51.5707	2.1e+12	9928.64	2.1e+08	3.0e+11	18.1866	69.7107	1.09392	6.9e+10	52.9	-0.198172	13.8644	6.60191	.	20178	5480	18.1885	4.60059	13.0831	8.70889	0.195564	0.084456	2.2564	1.88813	1.19504
40	BRA	Brazil	巴西	2018	D01T02	26967.7	6831.7	20136	1.23654	7.84281	0	.	1	.	.	.	.	.	2.06498	9121.02	25.1451	.	7.8e+10	1.9e+12	53.2574	1.9e+12	9151.45	2.1e+08	2.9e+11	22.3182	69.7431	1.16038	7.8e+10	51.4	-0.23775	14.8611	7.84281	.	19877	4980	18.7491	4.4204	12.6374	12.7687	0.248457	0.100386	2.37378	1.9197	1.23654
41	BRN	Brunei Darussalam	文莱	1995	D01T02	0	0	0	1.00828	0.011971	0	.	1	.	.	.	.	.	15.382	15828	56.7546	0	5.8e+08	4.7e+09	2.70671	4.7e+09	15933.5	297112	1.7e+09	94.9088	64.2087	-0.00158	5.8e+08	70.9	0.7725	.	0.011971	.	42	.	54.271	1.16153	.	.	0.066341	0.340678	2.02608	2.00944	1.00828
41	BRN	Brunei Darussalam	文莱	1996	D01T02	0	0	0	0.99636	0.011787	0	.	1	.	.	.	.	.	15.7651	16706.5	58.1017	0	6.5e+08	5.1e+09	5.02199	5.1e+09	16793.4	304620	2.1e+09	97.2515	64.5968	0.00092	6.5e+08	70.8	0.692704	.	0.011787	.	21	.	56.3041	1.12211	.	.	0.067378	0.354927	2.00191	2.00922	0.99636
41	BRN	Brunei Darussalam	文莱	1997	D01T02	0	0	0	0.931663	0.011382	0	.	1	.	.	.	.	.	16.6825	16593.4	59.4336	0	7.0e+08	5.2e+09	7.33727	5.2e+09	16660.1	311962	1.9e+09	89.8538	65.0979	0.00342	7.0e+08	70.7	0.612908	.	0.011382	.	42	.	56.0453	1.22734	0.048574	91.1105	0.053547	0.347897	1.96902	2.11344	0.931663
41	BRN	Brunei Darussalam	文莱	1998	D01T02	0	0	0	0.910874	0.030372	0	.	1	.	.	.	.	.	14.1117	12653.8	60.7499	0	5.7e+08	4.1e+09	9.65255	4.1e+09	12694.1	319135	1.4e+09	89.1106	65.6741	0.00592	5.7e+08	70.6	0.533112	.	0.030372	.	32	.	51.5339	1.41028	0.085161	88.5755	0.052745	0.356493	1.87105	2.05413	0.910874
41	BRN	Brunei Darussalam	文莱	1999	D01T02	0	0	0	1.00888	0.008797	0	.	1	.	.	.	.	.	13.5547	14065.7	62.0579	0	7.5e+08	4.6e+09	11.9678	4.6e+09	14101.2	326214	9.8e+08	85.2391	66.3045	0.00842	7.5e+08	70.5	0.550105	.	0.008797	.	34	.	55.1846	1.23498	.	.	0.043044	0.354273	2.08599	2.06764	1.00888
41	BRN	Brunei Darussalam	文莱	2000	D01T02	0	0	0	1.18202	0.006901	0	.	1	.	.	.	.	.	14.1286	17971.9	63.3636	0	5.5e+08	6.0e+09	12.6871	6.0e+09	18012.5	333166	7.8e+08	83.484	66.9749	0.01092	5.5e+08	70.4	0.567097	.	0.006901	.	21	.	63.6698	1.02441	.	.	0.093223	0.341061	2.5821	2.18448	1.18202
41	BRN	Brunei Darussalam	文莱	2001	D01T02	0.1	0.1	0	1.09873	0.009413	0	.	1	.	.	.	.	.	13.819	16437.4	64.6581	0	6.1e+07	5.6e+09	14.2408	5.6e+09	16472	340037	8.2e+08	85.6797	67.3927	0.01342	6.1e+07	70.3	0.543883	0.556423	0.009413	.	21	.	60.0424	1.13457	0.001239	95.306	0.090917	0.366602	2.41348	2.19661	1.09873
41	BRN	Brunei Darussalam	文莱	2002	D01T02	0	0	0	1.0979	0.001131	0	.	1	.	.	.	.	.	13.2967	16817.2	65.9323	0	2.3e+08	5.8e+09	13.9176	5.8e+09	16850.4	346777	1.2e+09	89.9829	67.881	0.01592	2.3e+08	70.2	0.520668	0.793466	0.001131	285.482	21	.	60.662	1.09357	0	93.2257	0.094028	0.351406	2.46467	2.24489	1.0979
41	BRN	Brunei Darussalam	文莱	2003	D01T02	0.1	0.1	0	1.15418	0.007982	0	.	1	.	.	.	.	.	15.5785	18521.4	67.1812	0	1.2e+08	6.6e+09	14.0062	6.6e+09	18560.5	353295	9.8e+08	87.6576	68.3523	0.01842	1.2e+08	70.1	0.509708	1.08404	0.007982	277.39	43	.	64.1475	1.2222	0.00075	94.3812	0.105735	0.345586	2.57206	2.22847	1.15418
41	BRN	Brunei Darussalam	文莱	2004	D01T02	0	0	0	1.20633	0.008453	0	.	1	.	.	.	.	.	14.1569	21839.3	68.3987	0	1.1e+08	7.9e+09	14.6859	7.9e+09	21902	359434	1.1e+09	82.3009	68.7889	0.03701	1.1e+08	70	0.468541	1.73722	0.008453	283.502	31	.	67.8532	1.12745	0.117652	91.4093	0.114507	0.314699	2.67682	2.21897	1.20633
41	BRN	Brunei Darussalam	文莱	2005	D01T02	0	0	0	1.27136	0.008373	0	.	1	.	.	.	.	.	13.6108	25991.2	69.5858	0	1.8e+08	9.5e+09	14.5607	9.5e+09	26105.4	365112	1.1e+09	81.2053	69.2159	0.054197	1.8e+08	69.9	0.406458	2.21588	0.008373	.	26	.	71.5603	0.946593	.	.	0.175531	0.375125	2.84641	2.23887	1.27136
41	BRN	Brunei Darussalam	文莱	2006	D01T02	0	0	0	1.42541	0.00856	0	.	1	.	.	.	.	.	20.1731	30767.7	70.7416	0	8.8e+07	1.1e+10	14.5046	1.2e+10	30980	370262	1.2e+09	81.1807	69.4196	0.071384	8.8e+07	69.8	0.361021	2.40445	0.00856	.	41	.	73.1765	0.706142	0.115295	96.3258	0.193566	0.216756	3.22397	2.26179	1.42541
41	BRN	Brunei Darussalam	文莱	2007	D01T02	0.1	0.1	0	1.17986	0.009	0	.	1	.	.	.	.	.	18.86	32337.3	71.8687	0	2.6e+08	1.2e+10	15.0122	1.2e+10	32663.4	374967	1.6e+09	79.762	69.7217	0.088571	2.6e+08	69.7	0.430501	3.06721	0.009	.	64	.	71.3048	0.689655	0.091878	96.1452	0.095213	0.207667	2.64564	2.24232	1.17986
41	BRN	Brunei Darussalam	文莱	2008	D01T02	0	0	0	1.22143	0.006761	0	.	1	.	.	.	.	.	20.5748	37427.5	72.9731	0	2.2e+08	1.4e+10	15.739	1.4e+10	37934.7	379418	2.0e+09	89.5638	70.0565	0.105759	2.2e+08	69.6	0.456237	4.3922	0.006761	.	75	.	74.113	0.63585	0.085534	97.8152	0.125393	0.246617	2.84246	2.32715	1.22143
41	BRN	Brunei Darussalam	文莱	2009	D01T02	0.1	0.1	0	0.923825	0.011448	0	.	1	.	.	.	.	.	20.1744	27497.5	74.0628	0	3.3e+08	1.1e+10	16.766	1.1e+10	27956	383902	1.9e+09	89.9056	70.3698	0.122946	3.3e+08	69.5	0.740359	5.13155	0.011448	.	42	.	65.4052	0.908957	0.079042	96.0622	0.049678	0.282067	2.10114	2.27439	0.923825
41	BRN	Brunei Darussalam	文莱	2010	D01T02	0.1	0.1	0	0.920191	0.004785	0	.	1	.	.	.	.	.	18.1057	34609.7	75.1524	0	4.8e+08	1.4e+10	15.4591	1.4e+10	35270.6	388634	3.2e+09	83.4952	70.6512	0.140133	4.8e+08	69.4	0.713574	5.47883	0.004785	.	.	.	68.657	0.733012	0.15427	95.1503	0.057705	0.309872	2.11609	2.29962	0.920191
41	BRN	Brunei Darussalam	文莱	2011	D01T02	0.1	0.1	0	1.02746	0.003354	0	.	1	.	.	.	.	.	18.263	46139.1	76.1871	0.004441	6.9e+08	1.9e+10	17.4043	1.9e+10	47056	393687	4.8e+09	86.8757	71.0476	0.15732	6.9e+08	69.3	0.706292	5.77451	0.003354	.	.	.	73.6729	0.575033	0.090638	95.4422	0.070873	0.280662	2.26078	2.20036	1.02746
41	BRN	Brunei Darussalam	文莱	2012	D01T02	0.1	0.1	0	0.977309	0.00336	0	.	1	.	.	.	.	.	17.9508	46844.2	77.1602	0.004491	8.6e+08	1.9e+10	22.4297	1.9e+10	47739.6	398997	6.2e+09	87.0068	71.3052	0.174507	8.7e+08	69.2	0.622888	4.88129	0.00336	.	11	20	72.6568	0.655399	0.105984	95.7472	0.071575	0.33281	2.26094	2.31343	0.977309
41	BRN	Brunei Darussalam	文莱	2013	D01T02	0.1	0.1	0	0.919442	0.006779	0	.	1	.	.	.	.	.	17.5098	43950.1	78.1218	0.005654	7.8e+08	1.8e+10	24.3401	1.8e+10	44740.9	404414	7.1e+09	83.2273	71.4805	0.191694	7.8e+08	69.1	0.630833	6.69343	0.006779	.	15	20	70.0252	0.684659	0.094818	96.5248	0.062461	0.351274	2.13811	2.32544	0.919442
41	BRN	Brunei Darussalam	文莱	2014	D01T02	0.3	0.3	0	0.900909	0.017005	0	.	1	.	.	.	.	.	16.9932	41035.8	79.0619	0.00484	5.7e+08	1.7e+10	32.0204	1.7e+10	41725.9	409778	4.7e+09	82.5109	71.6472	0.208881	5.7e+08	69	0.618622	7.26235	0.017005	.	91	26	67.8521	0.862737	0.109637	92.5399	0.055594	0.306183	2.03841	2.26262	0.900909
41	BRN	Brunei Darussalam	文莱	2015	D01T02	0.4	0.4	0	0.758062	0.01184	0	.	1	.	.	.	.	.	15.1807	30681.4	79.9691	.	1.7e+08	1.3e+10	31.3006	1.3e+10	31164	414914	4.5e+09	74.1045	71.8373	0.226069	1.7e+08	68.9	0.563548	8.16848	0.01184	.	.	.	61.3624	1.10249	0.160154	92.9795	0.015335	0.297263	1.7167	2.26459	0.758062
41	BRN	Brunei Darussalam	文莱	2016	D01T02	0.3	0.3	0	0.7859	0.012518	0	.	1	.	.	.	.	.	16.3582	26762	80.8338	.	-150000000	1.1e+10	31.9242	1.1e+10	27158.4	419791	3.9e+09	66.2582	71.8159	0.243256	-150000000	67.3	0.510133	8.47899	0.012518	.	73	16	57.2884	1.20363	0.319456	87.8815	0.014993	0.296974	1.72728	2.19783	0.7859
41	BRN	Brunei Darussalam	文莱	2017	D01T02	0.3	0.3	0	0.767914	0.012917	0	.	1	.	.	.	.	.	16.9428	28187	81.6463	.	4.7e+08	1.2e+10	33.565	1.2e+10	28571.6	424481	4.2e+09	71.3714	71.9363	0.260443	4.7e+08	69.8	0.571804	9.5455	0.012917	.	99	8	59.7205	1.08645	0.256824	89.5673	0.021479	0.312124	1.72241	2.24298	0.767914
41	BRN	Brunei Darussalam	文莱	2018	D01T02	0.4	0.4	0	0.82636	0.01344	0	.	1	.	.	.	.	.	17.3623	31241	82.4049	.	5.2e+08	1.4e+10	31.2118	1.4e+10	31628.5	428960	5.6e+09	79.1459	72.1004	0.27763	5.2e+08	64.2	0.620057	11.3873	0.01344	.	95	26	63.2436	1.01762	0.000353	95.5632	0.026735	0.294973	1.84036	2.22706	0.82636
42	BGR	Bulgaria	保加利亚	1995	D01T02	0.3	0.2	0.1	1.05927	2.51724	0	.	1	.	.	.	.	.	6.52895	2259.26	75.9836	20.1002	9.0e+07	1.9e+10	36.4022	1.9e+10	2258.29	8.4e+06	3.2e+09	58.0247	66.9834	0.37104	9.0e+07	50	-0.187766	.	2.51724	.	363	368	17.8892	9.21832	.	.	0.106222	0.065999	2.05276	1.9379	1.05927
42	BGR	Bulgaria	保加利亚	1996	D01T02	0.2	0.2	0.1	1.00374	2.94894	0	.	1	.	.	.	.	.	6.6128	1470.2	75.5928	21.3137	1.1e+08	1.2e+10	40.9453	1.2e+10	1470.1	8.4e+06	5.5e+08	81.0543	67.131	0.41826	1.1e+08	48.6	-0.099196	.	2.94894	1778.95	407	316	16.2131	9.59258	9.65208	6.50524	0.149702	0.114501	1.97001	1.96267	1.00374
42	BGR	Bulgaria	保加利亚	1997	D01T02	0.4	0.3	0.1	1.18606	2.96773	0	.	1	.	.	.	.	.	6.37562	1361.41	75.1339	22.9758	5.0e+08	1.1e+10	42.9657	1.1e+10	1361.39	8.3e+06	1.1e+09	87.2217	67.2421	0.46548	5.1e+08	47.6	-0.010625	.	2.96773	1458.87	538	394	21.7751	20.4768	10.9983	7.59288	0.11804	0.062532	2.34858	1.98015	1.18606
42	BGR	Bulgaria	保加利亚	1998	D01T02	0.2	0.2	0	1.09286	2.66332	0	.	1	.	.	.	.	.	6.11346	1820.45	74.6342	22.8581	5.4e+08	1.5e+10	42.783	1.5e+10	1820.41	8.3e+06	2.2e+09	61.5341	67.3451	0.48223	5.4e+08	45.7	0.077945	.	2.66332	1471.18	524	274	21.2892	13.4116	9.00882	6.23806	0.110639	0.08321	2.14411	1.96192	1.09286
42	BGR	Bulgaria	保加利亚	1999	D01T02	0.4	0.3	0.1	1.05175	2.5171	0	.	1	.	.	.	.	.	5.39813	1659.72	74.217	23.3499	8.2e+08	1.4e+10	44.8328	1.4e+10	1659.72	8.2e+06	2.2e+09	69.3973	67.5025	0.53688	8.2e+08	46.2	0.104482	.	2.5171	1311.52	616	282	22.3384	12.9586	9.38716	7.0008	0.099274	0.12063	2.06092	1.95951	1.05175
42	BGR	Bulgaria	保加利亚	2000	D01T02	0.4	0.4	0.1	1.01286	1.84088	0	.	1	.	.	.	.	.	5.31459	1621.26	73.8513	26.253	1.0e+09	1.3e+10	44.1298	1.3e+10	1621.24	8.2e+06	2.2e+09	86.0346	67.7454	0.49517	1.0e+09	47.3	0.131018	.	1.84088	1185.18	709	231	22.6776	10.9705	12.6698	11.6856	0.067039	0.125374	2.07519	2.04885	1.01286
42	BGR	Bulgaria	保加利亚	2001	D01T02	0.5	0.5	0	0.989104	1.68054	0	.	1	.	.	.	.	.	5.76661	1770.91	72.3958	26.7864	8.1e+08	1.4e+10	42.7811	1.4e+10	1770.91	8.0e+06	2.7e+09	87.4044	67.9707	0.44709	8.1e+08	51.9	0.200471	.	1.68054	1162.19	785	283	23.9809	10.6033	10.5849	8.96915	0.060373	0.134037	2.06955	2.09235	0.989104
42	BGR	Bulgaria	保加利亚	2002	D01T02	0.5	0.4	0.1	1.03139	2.54799	0	.	1	.	.	.	.	.	5.56323	2092.98	72.0327	28.5473	9.0e+08	1.6e+10	40.8823	1.6e+10	2092.96	7.8e+06	3.1e+09	83.4428	68.2333	0.46473	9.1e+08	57.1	0.269925	.	2.54799	1172.48	735	289	24.0045	9.71057	9.77908	6.00638	0.086434	0.129067	2.12573	2.06104	1.03139
42	BGR	Bulgaria	保加利亚	2003	D01T02	0.7	0.6	0.1	1.02719	2.23275	0	.	1	.	.	.	.	.	6.1648	2719.49	71.4841	24.1388	2.1e+09	2.1e+10	41.6221	2.1e+10	2719.5	7.8e+06	4.2e+09	87.0845	68.5211	0.47222	2.1e+09	57	0.218915	.	2.23275	1228.68	680	278	24.3194	9.09563	10.2774	5.81063	0.08428	0.137435	2.13037	2.07397	1.02719
42	BGR	Bulgaria	保加利亚	2004	D01T02	0.5	0.4	0.1	1.04347	2.26474	0	.	1	.	.	.	.	.	6.12499	3389.69	70.9531	24.2108	3.1e+09	2.6e+10	42.5552	2.6e+10	3389.71	7.7e+06	5.5e+09	93.2223	68.7992	0.47086	3.1e+09	59.2	0.230388	0.084561	2.26474	1268.88	133	263	23.1334	8.45219	12.4085	7.9939	0.103886	0.155078	2.20446	2.11263	1.04347
42	BGR	Bulgaria	保加利亚	2005	D01T02	0.5	0.4	0.2	1.05064	2.4158	0	.	1	.	.	.	.	.	6.26528	3899.83	70.4986	25.765	4.1e+09	3.0e+10	45.368	3.0e+10	3899.91	7.7e+06	7.7e+09	100.11	69.0329	0.44269	4.1e+09	62.3	0.254793	2.11727	2.4158	1307.8	52	261	24.2324	7.28369	14.2274	10.3774	0.120951	0.171982	2.28792	2.17765	1.05064
42	BGR	Bulgaria	保加利亚	2006	D01T02	0.6	0.4	0.2	0.994137	2.64611	0	.	1	.	.	.	.	.	6.44055	4523.15	69.9717	26.1172	7.9e+09	3.4e+10	47.1509	3.4e+10	4523.05	7.6e+06	9.4e+09	111.501	69.0071	0.44216	7.9e+09	64.1	0.224648	4.95326	2.64611	1354.47	48	243	25.3704	6.09628	20.1509	13.283	0.148172	0.208094	2.23052	2.24367	0.994137
42	BGR	Bulgaria	保加利亚	2007	D01T02	1.1	0.7	0.4	0.933708	2.62561	0	.	1	.	.	.	.	.	6.97102	5888.78	69.4719	20.0248	1.4e+10	4.4e+10	50.5883	4.4e+10	5885.1	7.5e+06	1.3e+10	109.174	68.9733	0.4303	1.4e+10	62.7	0.240154	8.14967	2.62561	1478.62	28	211	26.2602	4.65178	17.7707	14.6038	0.180861	0.233297	2.14438	2.29663	0.933708
42	BGR	Bulgaria	保加利亚	2008	D01T02	2	1.2	0.8	0.985132	2.90148	0	.	1	.	.	.	.	.	6.67853	7271.31	68.9859	21.811	1.0e+10	5.4e+10	51.9133	5.4e+10	7265.74	7.5e+06	1.8e+10	108.874	68.8899	0.44766	1.0e+10	63.7	0.206109	10.991	2.90148	1513.01	22	249	24.9906	5.86963	16.698	16.0612	0.181906	0.224744	2.24654	2.28044	0.985132
42	BGR	Bulgaria	保加利亚	2009	D01T02	1.4	0.9	0.5	0.945999	3.24369	0	.	1	.	.	.	.	.	5.76374	6988.27	68.5745	24.2184	3.9e+09	5.2e+10	54.2355	5.2e+10	6988.23	7.4e+06	1.5e+10	76.6134	68.7126	0.49361	3.9e+09	64.6	0.249801	13.0723	3.24369	1601.39	24	242	26.5673	4.23579	14.995	12.5832	0.204164	0.236371	2.29566	2.42671	0.945999
42	BGR	Bulgaria	保加利亚	2010	D01T02	2.4	1.4	1	0.909693	3.47327	0	.	1	.	.	.	.	.	6.04962	6862.76	68.1245	24.3006	1.8e+09	5.0e+10	57.7952	5.0e+10	6812.41	7.4e+06	1.1e+10	91.5866	68.425	0.56663	1.8e+09	62.3	0.233605	14.8141	3.47327	1478.65	17	243	23.7573	4.03304	16.8658	13.2946	0.25713	0.249531	2.19683	2.41492	0.909693
42	BGR	Bulgaria	保加利亚	2011	D01T02	2.8	1.2	1.6	0.933122	3.57195	0	.	1	.	.	.	.	.	6.75495	7856.99	67.6891	23.5331	2.1e+09	5.7e+10	59.0287	5.7e+10	7809.43	7.3e+06	1.2e+10	105.931	67.925	0.53242	2.1e+09	64.9	0.178949	16.6615	3.57195	1613.03	21	262	25.0307	4.66148	18.7637	13.1295	0.297526	0.248028	2.1709	2.32649	0.933122
42	BGR	Bulgaria	保加利亚	2012	D01T02	3.2	1.6	1.6	0.93292	3.28657	0	.	1	.	.	.	.	.	6.16258	7431.01	67.2982	24.531	1.8e+09	5.4e+10	61.36	5.4e+10	7395.85	7.3e+06	1.2e+10	109.925	67.3842	0.60355	1.8e+09	64.7	0.195472	17.7843	3.28657	1540.77	14	245	25.3828	4.42998	17.1532	16.1705	0.281729	0.256255	2.18213	2.33904	0.93292
42	BGR	Bulgaria	保加利亚	2013	D01T02	4.5	2.1	2.4	0.936229	4.13229	0	.	1	.	.	.	.	.	5.45906	7686.63	66.9226	24.7898	2.0e+09	5.6e+10	64.192	5.6e+10	7655.13	7.3e+06	1.2e+10	114.864	66.8135	0.63682	2.0e+09	65	0.139089	19.1296	4.13229	1683.79	15	282	23.5108	4.51605	15.9566	14.7267	0.356344	0.256197	2.13009	2.27519	0.936229
42	BGR	Bulgaria	保加利亚	2014	D01T02	54.5	15	39.5	0.956138	3.91283	0	.	1	.	.	.	.	.	5.82153	7912.52	66.5433	25.8257	1.1e+09	5.7e+10	67.5636	5.7e+10	7876.87	7.2e+06	1.2e+10	112.291	66.2443	0.79281	1.1e+09	65.7	0.133195	20.0876	3.91283	1821.92	16	218	23.4436	4.55858	14.6635	12.6042	0.359959	0.253091	2.15617	2.25508	0.956138
42	BGR	Bulgaria	保加利亚	2015	D01T02	67.3	16	51.3	0.964143	3.87828	0	.	1	.	.	.	.	.	6.20738	7081.1	66.12	.	2.2e+09	5.1e+10	70.3015	5.1e+10	7055.94	7.2e+06	1.1e+10	107.757	65.7074	0.95201	2.2e+09	66.8	0.143449	22.089	3.87828	1977.29	11	280	24.0225	4.06069	14.0131	10.6156	0.378911	0.258723	2.15314	2.23321	0.964143
42	BGR	Bulgaria	保加利亚	2016	D01T02	17.2	5.1	12	0.996009	3.75796	0	.	1	.	.	.	.	.	5.83442	7574.19	65.6579	.	1.5e+09	5.4e+10	71.2457	5.4e+10	7548.85	7.1e+06	9.9e+09	103.156	65.2543	0.77217	1.5e+09	65.9	0.20049	23.428	3.75796	2237.29	11	230	24.4492	4.05315	11.4888	9.01292	0.382178	0.232862	2.09219	2.10057	0.996009
42	BGR	Bulgaria	保加利亚	2017	D01T02	21	5.5	15.5	0.995474	3.91756	0	.	1	.	.	.	.	.	6.20197	8386.59	65.1801	.	2.0e+09	5.9e+10	71.0307	5.9e+10	8334.08	7.1e+06	1.1e+10	111.277	64.7977	0.74308	2.0e+09	67.9	0.232448	25.015	3.91756	2125.18	23	202	23.9758	4.04091	14.1761	9.90937	0.411343	0.243049	2.09186	2.10137	0.995474
42	BGR	Bulgaria	保加利亚	2018	D01T02	32.7	6.8	25.9	0.924796	3.83798	0	.	1	.	.	.	.	.	5.82178	9451.85	64.7111	.	1.8e+09	6.6e+10	71.5215	6.6e+10	9427.73	7.0e+06	1.3e+10	107.916	64.3826	0.75565	1.8e+09	68.3	0.235063	26.7505	3.83798	2342.87	18	180	22.4047	3.38461	14.0561	8.89258	0.392284	0.269248	2.02572	2.19045	0.924796
43	KHM	Cambodia	柬埔寨	1995	D01T02	0.6	0.3	0.3	1.11974	2.45741	0	.	1	.	.	.	.	.	0.134694	315.142	61.86	0	1.5e+08	3.4e+09	1.31497	3.4e+09	322.932	1.1e+07	4.8e+08	59.3397	50.4917	0.012953	1.5e+08	38.8	-0.784139	.	2.45741	.	.	.	14.262	47.7246	.	.	0.04087	0.042969	1.4527	1.29736	1.11974
43	KHM	Cambodia	柬埔寨	1996	D01T02	1.8	1	0.8	1.09831	2.2185	0	.	1	.	.	.	.	.	0.136802	313.585	63.3504	0	2.9e+08	3.5e+09	1.58191	3.5e+09	319.286	1.1e+07	4.5e+08	48.935	50.6808	0.018217	2.9e+08	45.8	-0.836528	.	2.2185	.	.	.	14.9886	44.4631	.	.	0.031862	0.04395	1.43002	1.30202	1.09831
43	KHM	Cambodia	柬埔寨	1997	D01T02	3.9	2.2	1.6	1.14185	2.45257	0	.	1	.	.	.	.	.	0.143515	301.22	64.7608	0	2.0e+08	3.4e+09	1.26486	3.4e+09	304.765	1.1e+07	4.6e+08	52.2737	51.3986	0.023481	2.0e+08	52.8	-0.888917	.	2.45257	.	.	.	16.3857	44.4472	.	.	0.054817	0.043887	1.48064	1.29671	1.14185
43	KHM	Cambodia	柬埔寨	1998	D01T02	10.4	5.8	4.7	1.12018	2.54056	0	.	1	.	.	.	.	.	0.161298	267.41	66.1063	0	1.2e+08	3.1e+09	1.67036	3.1e+09	268.99	1.2e+07	3.9e+08	63.0042	52.5704	0.028745	1.2e+08	59.8	-0.941307	.	2.54056	.	.	.	16.7091	44.48	.	.	0.04903	0.044231	1.45738	1.30102	1.12018
43	KHM	Cambodia	柬埔寨	1999	D01T02	19.1	10.3	8.8	1.11819	2.74418	0	.	1	.	.	.	.	.	0.160274	295.591	67.4088	0	1.0e+08	3.5e+09	2.07586	3.5e+09	295.903	1.2e+07	5.6e+08	77.3333	53.9483	0.034008	1.0e+08	59.9	-0.853251	.	2.74418	.	.	.	18.0398	40.9039	.	.	0.063605	0.049549	1.44796	1.29491	1.11819
43	KHM	Cambodia	柬埔寨	2000	D01T02	14.6	7.6	7	1.11114	2.85989	0	.	1	.	.	.	.	.	0.161979	301.517	68.6542	0.00252	1.2e+08	3.7e+09	2.48136	3.7e+09	300.614	1.2e+07	6.7e+08	91.0775	55.3288	0.039272	1.2e+08	59.3	-0.765196	.	2.85989	.	.	.	21.8567	35.9187	0.005394	0.001032	0.081387	0.057572	1.45615	1.3105	1.11114
43	KHM	Cambodia	柬埔寨	2001	D01T02	23.9	12.4	11.5	1.12271	2.77155	0	.	1	.	.	.	.	.	0.174466	322.9	69.8969	0.002507	1.5e+08	4.0e+09	2.37991	4.0e+09	321.15	1.2e+07	6.3e+08	90.2108	56.5074	0.044536	1.5e+08	59.6	-0.777701	.	2.77155	.	.	.	22.2874	34.3203	0.001778	0.003183	0.086307	0.058781	1.49685	1.33325	1.12271
43	KHM	Cambodia	柬埔寨	2002	D01T02	16.9	8.9	8	1.10922	2.73836	0	.	1	.	.	.	.	.	0.176002	341.037	71.1635	0.054898	1.3e+08	4.3e+09	2.48943	4.3e+09	338.987	1.3e+07	8.2e+08	98.9956	57.4486	0.0498	1.3e+08	60.7	-0.790207	0.000398	2.73836	17.6416	.	.	24.2539	31.129	0.000593	0.000664	0.087684	0.061222	1.48033	1.33457	1.10922
43	KHM	Cambodia	柬埔寨	2003	D01T02	9.4	4.7	4.7	1.10945	2.95093	0	.	1	.	.	.	.	.	0.185975	364.275	72.4434	0.073854	8.2e+07	4.7e+09	2.91816	4.7e+09	362.335	1.3e+07	8.7e+08	100.424	58.1874	0.055064	8.2e+07	63.7	-0.851199	0.003277	2.95093	.	.	.	24.9857	31.9708	0.019975	0.000947	0.091771	0.062123	1.48521	1.3387	1.10945
43	KHM	Cambodia	柬埔寨	2004	D01T02	2.6	1.2	1.4	1.10692	3.19116	0	.	1	.	.	.	.	.	0.182678	410.086	73.7388	0.063909	1.3e+08	5.3e+09	2.81714	5.3e+09	408.514	1.3e+07	9.8e+08	112.237	58.8522	0.060328	1.3e+08	61.1	-0.836363	0.005992	3.19116	.	.	.	25.6454	29.3898	0.0073	0.001173	0.103156	0.066697	1.48936	1.3455	1.10692
43	KHM	Cambodia	柬埔寨	2005	D01T02	4.2	1.7	2.5	1.0444	3.26411	0	.	1	.	.	.	.	.	0.200618	475.069	75.043	0.100524	3.8e+08	6.3e+09	3.38856	6.3e+09	474.111	1.3e+07	1.2e+09	111.536	59.547	0.065592	3.8e+08	60	-0.897611	0.007549	3.26411	.	.	.	24.9914	30.7101	0.014925	8.0e-07	0.101609	0.081053	1.42876	1.36802	1.0444
43	KHM	Cambodia	柬埔寨	2006	D01T02	14.2	5	9.2	1.07182	3.53845	0	.	1	.	.	.	.	.	0.219843	539.747	76.3527	0.119243	4.8e+08	7.3e+09	5.67855	7.3e+09	539.75	1.3e+07	1.4e+09	116.336	60.2995	0.070855	4.8e+08	56.7	-0.89113	0.021517	3.53845	.	.	.	26.1832	30.0588	0.027668	.	0.118104	0.09312	1.55168	1.44771	1.07182
43	KHM	Cambodia	柬埔寨	2007	D01T02	16.3	5	11.3	1.06041	3.41023	0	.	1	.	.	.	.	.	0.266918	629.921	77.6954	0.114242	8.7e+08	8.6e+09	7.31446	8.6e+09	631.525	1.4e+07	1.7e+09	110.276	61.0425	0.076119	8.7e+08	55.9	-0.827332	0.061612	3.41023	.	13	.	24.9443	29.6965	0.121352	.	0.110496	0.097197	1.55079	1.46245	1.06041
43	KHM	Cambodia	柬埔寨	2008	D01T02	24.5	7.3	17.2	1.0611	3.40489	0	.	1	.	.	.	.	.	0.290844	742.398	78.9932	0.124447	8.2e+08	1.0e+10	9.12243	1.0e+10	745.609	1.4e+07	1.8e+09	108.347	61.7705	0.081383	8.2e+08	55.9	-0.847749	0.119006	3.40489	.	39	.	22.3718	32.7511	2.78724	1.2e-05	0.123981	0.098543	1.55925	1.46947	1.0611
43	KHM	Cambodia	柬埔寨	2009	D01T02	19	5.9	13.1	1.05166	2.89154	0	.	1	.	.	.	.	.	0.3352	734.815	80.1934	0.115116	9.3e+08	1.0e+10	11.769	1.0e+10	738.055	1.4e+07	2.1e+09	96.3867	62.4194	0.086647	9.3e+08	56.6	-0.866647	0.211928	2.89154	.	28	.	21.6617	33.4907	0.760522	.	0.087079	0.090898	1.55849	1.48194	1.05166
43	KHM	Cambodia	柬埔寨	2010	D01T02	46.6	14.8	31.8	1.02954	3.12573	0	.	1	.	.	.	.	.	0.357906	782.696	81.3706	0.110706	1.4e+09	1.1e+10	13.965	1.1e+10	785.503	1.4e+07	1.8e+09	106.153	62.94	0.091911	1.4e+09	56.6	-0.868019	0.248309	3.12573	.	26	.	21.8686	33.8767	0.130283	0.000104	0.101095	0.104777	1.54139	1.49716	1.02954
43	KHM	Cambodia	柬埔寨	2011	D01T02	60.2	18.3	41.9	1.05645	3.02655	0	.	1	.	.	.	.	.	0.368035	880.31	82.5622	0.185012	1.5e+09	1.3e+10	14.8901	1.3e+10	882.276	1.5e+07	2.1e+09	124.743	63.2825	0.097175	1.5e+09	57.9	-0.824785	0.150955	3.02655	.	43	.	22.1418	34.5573	0.080369	.	0.102236	0.079828	1.539	1.45677	1.05645
43	KHM	Cambodia	柬埔寨	2012	D01T02	27	8.9	18.1	1.06952	3.01085	0	.	1	.	.	.	.	.	0.383718	950.483	83.7675	1.74046	2.0e+09	1.4e+10	14.4515	1.4e+10	950.88	1.5e+07	2.4e+09	136.526	63.6432	0.102438	2.0e+09	57.6	-0.71201	0.201087	3.01085	.	53	.	22.9765	33.5196	0.157583	0.014695	0.115868	0.086652	1.56789	1.46597	1.06952
43	KHM	Cambodia	柬埔寨	2013	D01T02	57	16.5	40.5	1.08619	3.03248	0	.	1	.	.	.	.	.	0.382515	1015.22	84.9744	2.89564	2.1e+09	1.5e+10	14.0129	1.5e+10	1013.42	1.5e+07	2.9e+09	106.521	63.9578	0.107702	2.1e+09	58.5	-0.736409	0.217658	3.03248	.	74	1	24.0677	31.5951	0.242457	0.000908	0.134895	0.0925	1.59146	1.46518	1.08619
43	KHM	Cambodia	柬埔寨	2014	D01T02	77.1	21.7	55.4	1.12609	3.07985	0	.	1	.	.	.	.	.	0.456728	1098.07	86.1705	3.31927	1.9e+09	1.7e+10	13.5742	1.7e+10	1093.5	1.5e+07	3.5e+09	105.002	64.1726	0.112966	1.9e+09	57.4	-0.714945	0.434631	3.07985	.	65	2	25.6069	28.8713	0.259412	3.2e-07	0.146439	0.09161	1.64646	1.46211	1.12609
43	KHM	Cambodia	柬埔寨	2015	D01T02	36.4	11.9	24.5	1.16157	2.91654	0	.	1	.	.	.	.	.	0.546949	1170.74	87.3415	.	1.8e+09	1.8e+10	13.1356	1.8e+10	1162.9	1.6e+07	3.9e+09	120.793	64.2786	0.11823	1.8e+09	57.5	-0.730273	0.541617	2.91654	30.367	65	.	27.6796	26.5804	0.124489	2.9e-05	0.144659	0.085359	1.66374	1.43231	1.16157
43	KHM	Cambodia	柬埔寨	2016	D01T02	34.4	11.8	22.6	1.17131	2.88034	0	.	1	.	.	.	.	.	0.708268	1281.11	88.5145	.	2.5e+09	2.0e+10	13.135	2.0e+10	1269.59	1.6e+07	4.3e+09	112.106	64.353	0.123494	2.5e+09	57.9	-0.731969	0.624919	2.88034	.	77	3	29.452	24.7427	0.127398	0.007714	0.144388	0.085292	1.6723	1.42772	1.17131
43	KHM	Cambodia	柬埔寨	2017	D01T02	11.1	6.9	4.2	1.17956	2.83383	0	.	1	.	.	.	.	.	0.80138	1400.9	89.6821	.	2.8e+09	2.2e+10	13.1343	2.2e+10	1385.26	1.6e+07	4.9e+09	115.258	64.3167	0.128758	2.8e+09	59.5	-0.762224	0.844139	2.83383	.	55	.	30.8489	23.3614	0.281044	5.1e-06	0.142239	0.082263	1.67357	1.41881	1.17956
43	KHM	Cambodia	柬埔寨	2018	D01T02	35.5	13.5	22	1.22628	2.94578	0	.	1	.	.	.	.	.	0.90969	1533.32	90.7843	.	3.2e+09	2.5e+10	13.6878	2.5e+10	1512.13	1.6e+07	5.5e+09	122.861	64.2299	0.134022	3.2e+09	58.7	-0.771144	1.03711	2.94578	.	160	1	32.2894	22.013	0.27395	0.000712	0.1526	0.081353	1.73035	1.41106	1.22628
45	HRV	Croatia	克罗地亚	1995	D01T02	0.3	0.2	0.1	1.03563	1.29583	0	.	1	.	.	.	.	.	3.34567	4930.34	82.6333	6.68628	1.1e+08	2.3e+10	26.2351	2.3e+10	4877.57	4.6e+06	3.2e+09	52.6703	67.8719	0.00291	1.1e+08	49.3	-0.275521	.	1.29583	.	335	265	26.4544	5.65006	2.33808	8.43264	0.064228	0.163532	2.25126	2.17381	1.03563
45	HRV	Croatia	克罗地亚	1996	D01T02	0.4	0.4	0	1.05417	1.2459	0	.	1	.	.	.	.	.	3.34814	5298.89	81.4058	7.71297	4.9e+08	2.4e+10	27.7943	2.4e+10	5232.85	4.6e+06	4.4e+09	52.1122	67.7682	0.21216	4.9e+08	48	-0.247173	.	1.2459	.	356	259	25.4291	5.59299	2.18067	9.22115	0.066834	0.162458	2.23564	2.12075	1.05417
45	HRV	Croatia	克罗地亚	1997	D01T02	0.6	0.6	0	1.00368	1.12137	0	.	1	.	.	.	.	.	3.76492	5330.33	81.0096	6.36928	6.0e+08	2.4e+10	27.6831	2.4e+10	5263.45	4.5e+06	5.2e+09	54.8068	67.5995	0.42141	6.0e+08	46.7	-0.218824	.	1.12137	.	439	273	26.5228	5.2423	2.58408	9.82434	0.060534	0.196497	2.1493	2.14142	1.00368
45	HRV	Croatia	克罗地亚	1998	D01T02	0.2	0.1	0	1.04805	1.20929	0	.	1	.	.	.	.	.	4.08902	5711.49	81.0613	5.69769	1.0e+09	2.6e+10	29.3639	2.6e+10	5640.33	4.5e+06	5.3e+09	50.0455	67.3991	0.63066	1.0e+09	51.7	-0.190475	.	1.20929	1054.34	352	267	24.8581	5.31863	2.18429	5.80486	0.0562	0.156688	2.1056	2.00907	1.04805
45	HRV	Croatia	克罗地亚	1999	D01T02	0.4	0.4	0	1.04347	1.2868	0	.	1	.	.	.	.	.	4.10376	5267.51	80.7118	6.5364	1.5e+09	2.3e+10	31.7017	2.4e+10	5198.09	4.5e+06	5.0e+09	51.5925	67.2254	0.83991	1.5e+09	53.1	-0.007772	.	1.2868	1239.33	144	246	23.9612	5.40407	2.22746	7.75035	0.063504	0.159066	2.12178	2.03339	1.04347
45	HRV	Croatia	克罗地亚	2000	D01T02	0.6	0.4	0.1	1.02025	1.41122	0	.	1	.	.	.	.	.	4.03742	4952.38	79.9167	6.96585	1.0e+09	2.2e+10	32.3812	2.2e+10	4841.61	4.5e+06	4.3e+09	56.9434	67.1124	1.04916	1.0e+09	53.6	0.17493	.	1.41122	1529.33	538	337	24.1566	4.96882	3.02218	10.9627	0.080122	0.171072	2.07187	2.03074	1.02025
45	HRV	Croatia	克罗地亚	2001	D01T02	1	0.5	0.5	0.984648	1.32746	0	.	1	.	.	.	.	.	4.46619	5364.01	76.9002	6.68077	1.0e+09	2.3e+10	35.133	2.3e+10	5362.02	4.3e+06	4.8e+09	59.9138	66.9026	0.92079	1.0e+09	50.7	0.248231	.	1.32746	1509.96	599	362	23.7604	4.96368	2.66229	10.2152	0.078561	0.186628	2.02814	2.05977	0.984648
45	HRV	Croatia	克罗地亚	2002	D01T02	0.6	0.5	0.2	0.950952	1.34657	0	.	1	.	.	.	.	.	4.71429	6219.47	76.9454	5.63348	9.8e+08	2.7e+10	37.9201	2.7e+10	6232.66	4.3e+06	6.0e+09	58.242	66.8456	0.95033	9.8e+08	51.1	0.321532	.	1.34657	1950.04	703	328	22.8692	4.84214	2.59431	9.34896	0.076498	0.202084	1.95926	2.06031	0.950952
45	HRV	Croatia	克罗地亚	2003	D01T02	1.6	0.9	0.7	0.898163	1.30879	0	.	1	.	.	.	.	.	5.02252	8192.32	76.8958	4.8219	1.8e+09	3.5e+10	40.7735	3.5e+10	8059.42	4.3e+06	9.0e+09	58.8071	66.8909	0.94981	1.9e+09	53.3	0.388244	0.076214	1.30879	1335.42	699	387	23.294	3.9349	2.27027	9.62308	0.06804	0.219882	1.873	2.08537	0.898163
45	HRV	Croatia	克罗地亚	2004	D01T02	1	0.6	0.4	0.933835	1.46943	0	.	1	.	.	.	.	.	4.90166	9723.38	76.9173	6.7571	1.3e+09	4.2e+10	42.0611	4.2e+10	9661.17	4.3e+06	1.1e+10	59.2486	66.9626	1.03031	1.3e+09	53.1	0.444796	0.589645	1.46943	1628.69	839	385	24.1007	4.41566	3.40409	11.3262	0.077268	0.199633	1.8992	2.03377	0.933835
45	HRV	Croatia	克罗地亚	2005	D01T02	0.8	0.5	0.3	0.903001	1.50831	0	.	1	.	.	.	.	.	4.97733	10446.4	77.0164	6.89839	1.8e+09	4.5e+10	44.7641	4.5e+10	10527.9	4.3e+06	1.2e+10	60.3701	67.0216	0.85614	1.8e+09	51.9	0.358934	2.62321	1.50831	1308.11	649	363	23.7317	3.86542	3.77534	13.8929	0.081334	0.208559	1.87654	2.07812	0.903001
45	HRV	Croatia	克罗地亚	2006	D01T02	1.8	0.9	0.8	0.939112	1.54684	0	.	1	.	.	.	.	.	5.01148	11489.4	77.0345	6.90371	3.3e+09	5.0e+10	45.5853	5.0e+10	11695.9	4.3e+06	1.3e+10	63.1417	67.1403	0.74007	3.4e+09	53.6	0.352755	5.69998	1.54684	1321.96	119	317	23.397	3.98227	4.38217	15.1072	0.086301	0.19524	1.87248	1.99388	0.939112
45	HRV	Croatia	克罗地亚	2007	D01T02	3.1	1.5	1.6	0.890489	1.46681	0	.	1	.	.	.	.	.	5.30809	13728.5	77.0177	5.02478	4.6e+09	6.0e+10	47.1877	6.0e+10	13937.4	4.3e+06	1.6e+10	63.1843	67.1632	0.79107	4.7e+09	53.4	0.377923	8.78555	1.46681	1404.95	93	344	22.9557	3.69773	4.58756	12.9343	0.083865	0.211738	1.86161	2.09055	0.890489
45	HRV	Croatia	克罗地亚	2008	D01T02	2.9	1.7	1.2	0.904465	1.3615	0	.	1	.	.	.	.	.	5.04241	15857.7	77.0085	6.52608	5.2e+09	7.0e+10	49.1642	7.0e+10	16296.8	4.3e+06	2.0e+10	63.8433	67.1163	0.88656	5.3e+09	54.1	0.365859	12.0171	1.3615	1538.61	71	330	22.8087	3.88795	4.29179	12.8973	0.079462	0.197289	1.82565	2.01848	0.904465
45	HRV	Croatia	克罗地亚	2009	D01T02	4.3	1.4	2.9	0.928602	1.30355	0	.	1	.	.	.	.	.	4.71732	14387.7	76.9277	7.94074	3.1e+09	6.3e+10	48.7859	6.3e+10	14540.6	4.3e+06	1.6e+10	50.3609	67.0546	0.84474	3.1e+09	55.1	0.395049	16.37	1.30355	1596.54	68	250	22.6523	3.9965	3.628	13.0145	0.07039	0.17489	1.83621	1.97739	0.928602
45	HRV	Croatia	克罗地亚	2010	D01T02	2.2	1.7	0.5	0.912177	1.35308	0	.	1	.	.	.	.	.	4.53047	13664.2	76.7534	9.26996	1.5e+09	6.0e+10	54.0285	6.0e+10	13949.3	4.3e+06	1.3e+10	53.1941	66.9971	0.74292	1.6e+09	59.2	0.423794	19.1788	1.35308	1641.34	21	257	21.3603	3.6528	4.50785	12.4673	0.082535	0.174937	1.84241	2.0198	0.912177
45	HRV	Croatia	克罗地亚	2011	D01T02	7.8	2.9	4.9	0.916877	1.37947	0	.	1	.	.	.	.	.	4.44599	14624	76.4888	7.07337	1.2e+09	6.3e+10	57.2278	6.3e+10	14609.5	4.3e+06	1.3e+10	57.5667	66.7222	0.75095	1.3e+09	61.1	0.420825	20.5163	1.37947	1587.49	21	230	21.5416	3.63241	5.16769	12.0766	0.094809	0.187846	1.89791	2.06997	0.916877
45	HRV	Croatia	克罗地亚	2012	D01T02	5.7	3.1	2.6	0.889488	1.431	0	.	1	.	.	.	.	.	4.07938	13410.8	76.2554	7.73815	1.5e+09	5.7e+10	60.6471	5.7e+10	13258.4	4.3e+06	1.1e+10	58.6824	66.5665	0.75101	1.5e+09	60.9	0.428028	21.2213	1.431	1556.84	32	217	21.1378	3.29249	5.19459	13.6719	0.100783	0.201958	1.90787	2.14491	0.889488
45	HRV	Croatia	克罗地亚	2013	D01T02	4.5	3.3	1.2	0.938101	1.47925	0	.	1	.	.	.	.	.	3.99714	13949.1	76.0433	10.3601	9.7e+08	5.8e+10	65.5349	5.8e+10	13674.4	4.3e+06	1.1e+10	59.5954	66.4946	0.81157	9.4e+08	61.3	0.45609	22.1572	1.47925	1526.68	23	230	20.6247	3.45344	4.42951	13.9913	0.115497	0.190114	1.9045	2.03017	0.938101
45	HRV	Croatia	克罗地亚	2014	D01T02	7.7	6.6	1.1	0.93369	1.48437	0	.	1	.	.	.	.	.	3.8308	13971	75.7342	11.9438	3.2e+09	5.8e+10	67.5102	5.8e+10	13599.4	4.2e+06	1.1e+10	63.5744	66.4022	0.78306	3.2e+09	60.4	0.460135	22.9807	1.48437	1437.43	30	170	20.8167	2.9469	3.69163	13.5075	0.139699	0.21086	1.93286	2.07012	0.93369
45	HRV	Croatia	克罗地亚	2015	D01T02	8.9	7.8	1	0.943805	1.45733	0	.	1	.	.	.	.	.	3.94954	12071.1	75.1126	.	3.5e+07	5.0e+10	66.491	5.0e+10	11781.7	4.2e+06	9.7e+09	67.6335	66.2131	0.84007	5.2e+07	61.5	0.411615	23.1788	1.45733	1504.18	17	169	20.5958	2.96696	2.82005	10.905	0.144846	0.214807	1.92191	2.03635	0.943805
45	HRV	Croatia	克罗地亚	2016	D01T02	7.9	6.6	1.3	0.998628	1.2977	0	.	1	.	.	.	.	.	4.04298	12550.7	74.5899	.	4.2e+08	5.2e+10	66.5324	5.2e+10	12361.5	4.2e+06	1.0e+10	69.2155	65.9528	0.86314	4.2e+08	59.1	0.441893	24.7125	1.2977	1850.5	13	175	20.5913	3.06144	2.80372	9.49405	0.130467	0.183335	1.96746	1.97016	0.998628
45	HRV	Croatia	克罗地亚	2017	D01T02	7.8	6.3	1.5	1.00074	1.21179	0	.	1	.	.	.	.	.	4.22058	13562.1	73.6997	.	4.5e+08	5.5e+10	67.8656	5.6e+10	13451.6	4.1e+06	1.1e+10	73.7145	65.5396	0.86266	4.8e+08	59.4	0.453274	26.1393	1.21179	1868.34	11	148	20.2022	2.88765	3.8156	10.7055	0.133228	0.192574	1.98624	1.98477	1.00074
45	HRV	Croatia	克罗地亚	2018	D01T02	8.1	6.9	1.2	1.019	1.22886	0	.	1	.	.	.	.	.	4.02007	15003.1	73.0442	.	1.3e+09	6.1e+10	67.6542	6.1e+10	15014.1	4.1e+06	1.3e+10	74.3052	65.0426	0.97192	1.2e+09	61	0.438589	27.1024	1.22886	1921.13	15	121	19.857	2.95146	3.88321	10.565	0.137881	0.199206	2.01859	1.98096	1.019
46	CYP	Cyprus	塞浦路斯	1995	D01T02	0.8	0.5	0.3	1.05726	2.33033	1	.	1	.	.	.	.	.	6.78093	15261.4	93.3353	1.82883	2.4e+08	9.9e+09	17.0166	9.9e+09	15261.4	855391	2.5e+09	49.5211	65.491	0.15906	2.4e+08	67.5	1.03303	.	2.33033	.	.	.	20.059	4.77611	1.13816	1.62195	0.261121	0.209224	1.98668	1.87908	1.05726
46	CYP	Cyprus	塞浦路斯	1996	D01T02	0.2	0.2	0.1	1.02281	2.03858	1	.	1	.	.	.	.	.	7.05783	15139.2	95.2444	1.70187	2.3e+08	1.0e+10	19.1796	1.0e+10	15139.2	873426	2.4e+09	53.6361	65.6696	0.17381	2.3e+08	67.7	1.00756	.	2.03858	.	.	.	20.1416	4.57822	1.99891	2.58765	0.229031	0.217228	1.95854	1.91486	1.02281
46	CYP	Cyprus	塞浦路斯	1997	D01T02	0.1	0.1	0	0.976736	1.41201	1	.	1	.	.	.	.	.	7.02519	14234.2	97.1289	1.79119	5.5e+08	9.5e+09	20.9354	9.6e+09	14234.2	891190	2.3e+09	51.373	66.0168	0.18856	5.5e+08	67.9	0.982095	.	1.41201	.	.	.	19.6543	3.92035	4.61528	1.92611	0.158589	0.234995	1.94945	1.99589	0.976736
46	CYP	Cyprus	塞浦路斯	1998	D01T02	0.1	0.1	0	1.01144	1.57471	1	.	1	.	.	.	.	.	7.22673	15092.8	98.9892	1.71706	3.5e+08	1.0e+10	20.9839	1.0e+10	15092.8	908710	2.0e+09	46.3087	66.454	0.20331	3.5e+08	68.2	0.956628	.	1.57471	345.604	.	.	19.2368	4.33454	4.37661	2.60506	0.178884	0.205418	1.93584	1.91395	1.01144
46	CYP	Cyprus	塞浦路斯	1999	D01T02	0.1	0.1	0	1.00001	1.34124	1	.	1	.	.	.	.	.	7.37559	15287.9	100.823	1.75374	8.1e+08	1.0e+10	21.0324	1.1e+10	15287.9	926049	2.2e+09	43.9611	66.9136	0.21806	8.1e+08	67.8	0.978409	.	1.34124	402.609	.	.	18.4882	3.89894	5.39812	3.01712	0.149855	0.206499	1.89344	1.89342	1.00001
46	CYP	Cyprus	塞浦路斯	2000	D01T02	0.1	0.1	0	1.04498	1.15201	1	.	1	.	.	.	.	.	7.51679	14388.3	102.623	1.6606	8.5e+08	1.0e+10	19.5623	1.0e+10	14388.3	943288	2.0e+09	48.038	67.3714	0.2269	8.6e+08	67.2	1.00019	.	1.15201	434.378	.	.	17.686	3.64726	4.85056	5.91527	0.141835	0.207413	1.97842	1.89326	1.04498
46	CYP	Cyprus	塞浦路斯	2001	D01T02	0.1	0.1	0	1.11688	1.19364	1	.	1	.	.	.	.	.	7.24698	14821.4	104.419	1.62759	9.4e+08	1.0e+10	21.6125	1.0e+10	14821.4	960274	2.0e+09	47.1153	67.7349	0.23694	9.5e+08	71	1.00651	0.354359	1.19364	471.98	.	.	17.3938	3.8608	4.84679	5.08966	0.139071	0.193643	2.08951	1.87085	1.11688
46	CYP	Cyprus	塞浦路斯	2002	D01T02	0.1	0.1	0	1.09001	1.09294	1	.	1	.	.	.	.	.	7.29846	16093.2	106.298	1.6424	1.1e+09	1.1e+10	25.1023	1.1e+10	16093.2	976968	2.4e+09	43.1603	68.1121	0.27967	1.1e+09	73	1.01283	0.823735	1.09294	609.483	.	.	17.9302	3.78826	4.89471	3.88476	0.119654	0.187851	2.05163	1.88221	1.09001
46	CYP	Cyprus	塞浦路斯	2003	D01T02	0.1	0.1	0	1.08591	1.17788	1	.	1	.	.	.	.	.	7.83136	20252.2	108.263	1.54952	9.1e+08	1.5e+10	31.9636	1.5e+10	20252.2	993562	3.0e+09	37.0446	68.485	0.31834	9.1e+08	73.3	1.02099	1.38788	1.17788	677.832	85	12	18.013	3.35291	4.80125	3.58842	0.130436	0.187881	2.07421	1.91012	1.08591
46	CYP	Cyprus	塞浦路斯	2004	D01T02	0	0	0	1.09778	1.26855	1	.	1	.	.	.	.	.	7.63613	23792.6	110.247	1.81275	1.1e+09	1.7e+10	35.8637	1.7e+10	23792.6	1.0e+06	3.6e+09	37.239	68.8592	0.33564	1.1e+09	74.1	0.916557	2.32879	1.26855	795.289	85	9	18.0675	3.08332	4.29975	0.969512	0.140834	0.18697	2.13558	1.94536	1.09778
46	CYP	Cyprus	塞浦路斯	2005	D01T02	0.2	0.2	0	1.11013	1.10571	1	.	1	.	.	.	.	.	7.61845	24959.3	112.236	1.8643	1.2e+09	1.8e+10	33.2208	1.8e+10	24959.3	1.0e+06	4.0e+09	42.2114	69.2369	0.36727	1.2e+09	71.9	0.940954	4.28172	1.10571	916.651	44	20	17.8911	2.73853	6.94255	0.038643	0.121925	0.182244	2.16424	1.94955	1.11013
46	CYP	Cyprus	塞浦路斯	2006	D01T02	0.2	0.2	0	1.05902	0.93363	1	.	1	.	.	.	.	.	7.57922	26729.3	114.225	1.87822	1.9e+09	2.0e+10	33.4199	2.0e+10	26729.3	1.0e+06	5.0e+09	41.1552	69.5418	0.38346	1.9e+09	71.8	1.05578	8.32353	0.93363	986.917	.	.	17.8301	2.27597	12.5677	0.052638	0.112612	0.207424	2.18163	2.06005	1.05902
46	CYP	Cyprus	塞浦路斯	2007	D01T02	0.2	0.2	0	1.00684	0.873256	1	.	1	.	.	.	.	.	7.73564	31244.9	116.22	2.21872	2.3e+09	2.4e+10	36.1738	2.4e+10	31244.9	1.1e+06	6.1e+09	41.7585	69.8722	0.40007	2.3e+09	71.7	1.09393	12.5725	0.873256	1029.2	16	3	18.1971	2.02354	14.2264	0.00758	0.123659	0.221513	2.14448	2.12993	1.00684
46	CYP	Cyprus	塞浦路斯	2008	D01T02	0.1	0.1	0	1.03196	1.10937	1	.	1	.	.	.	.	.	7.77259	35397.4	118.224	2.22607	1.2e+10	2.8e+10	42.618	2.8e+10	35397.4	1.1e+06	7.6e+09	44.091	70.1948	0.38594	1.2e+10	71.3	1.17421	18.4811	1.10937	1011.38	10	11	17.8966	2.09331	12.6279	0	0.158442	0.240721	2.13766	2.07145	1.03196
46	CYP	Cyprus	塞浦路斯	2009	D01T02	0.1	0.1	0	1.01767	1.22702	1	.	1	.	.	.	.	.	7.44941	32109.2	120.235	2.46991	6.5e+10	2.6e+10	52.0039	2.6e+10	32109.2	1.1e+06	6.1e+09	35.0428	70.4898	0.44437	6.5e+10	70.8	1.0605	21.4899	1.22702	1065.75	6	6	15.9545	1.98882	11.043	0	0.178699	0.23081	2.16831	2.13067	1.01767
46	CYP	Cyprus	塞浦路斯	2010	D01T02	0.2	0.2	0	0.948224	0.790644	1	.	1	.	.	.	.	.	6.99168	31105	122.26	2.86477	3.1e+10	2.6e+10	48.3116	2.6e+10	31023.6	1.1e+06	5.8e+09	38.7488	70.7459	0.44409	3.1e+10	70.9	1.10368	23.1549	0.790644	1077.7	4	4	14.4791	2.05766	13.6898	0.00235	0.107671	0.203235	1.94158	2.04759	0.948224
46	CYP	Cyprus	塞浦路斯	2011	D01T02	0.6	0.5	0	0.95868	0.836415	1	.	1	.	.	.	.	.	6.66727	32485.8	123.927	3.52122	4.0e+10	2.8e+10	46.5397	2.8e+10	32396.4	1.1e+06	5.3e+09	38.0766	70.7171	0.45389	4.1e+10	73.3	1.06684	24.6113	0.836415	1063.79	8	.	12.7454	2.14532	16.8429	0.01367	0.122068	0.195714	1.94525	2.02909	0.95868
46	CYP	Cyprus	塞浦路斯	2012	D01T02	0.7	0.7	0	0.942811	0.664455	1	.	1	.	.	.	.	.	6.13788	28991.9	125.168	4.22991	7.0e+10	2.5e+10	45.8636	2.5e+10	28912.2	1.1e+06	3.9e+09	36.1751	70.6639	0.43888	7.0e+10	71.8	1.08831	25.4741	0.664455	1017.46	8	4	11.758	2.00127	16.4418	0	0.09981	0.195474	1.92678	2.04365	0.942811
46	CYP	Cyprus	塞浦路斯	2013	D01T02	1	0.9	0.1	0.927791	0.695312	1	.	1	.	.	.	.	.	5.50803	27797.5	126.295	5.28515	2.6e+10	2.4e+10	47.5252	2.4e+10	27729.2	1.1e+06	3.4e+09	34.8648	70.5652	0.48607	2.6e+10	69	1.01838	26.7127	0.695312	1036.13	1	2	10.7493	2.03634	11.4983	2.3e-05	0.112438	0.206833	1.92697	2.07694	0.927791
46	CYP	Cyprus	塞浦路斯	2014	D01T02	2.4	1.9	0.4	0.846033	0.626793	1	.	1	.	.	.	.	.	5.78745	27244.3	127.38	5.22696	5.2e+10	2.3e+10	53.1044	2.3e+10	27163.3	1.2e+06	3.1e+09	48.1888	70.4268	0.51424	5.2e+10	67.6	0.993982	28.7616	0.626793	1064.93	.	4	9.97287	1.84488	9.44378	0	0.105765	0.239434	1.83626	2.17044	0.846033
46	CYP	Cyprus	塞浦路斯	2015	D01T02	2.4	2.1	0.3	0.834846	0.55143	1	.	1	.	.	.	.	.	5.77109	23487.2	128.494	1.82652	2.9e+10	2.0e+10	60.1012	2.0e+10	23408.3	1.2e+06	2.6e+09	51.9997	70.2715	0.47841	2.9e+10	67.9	0.956792	30.725	0.55143	1009.05	1	6	10.1909	1.86798	6.7341	11.7142	0.096285	0.249314	1.81363	2.17242	0.834846
46	CYP	Cyprus	塞浦路斯	2016	D01T02	2.8	2.3	0.6	0.916404	0.540284	1	.	1	.	.	.	.	.	6.02664	24715.1	129.641	1.76282	8.5e+09	2.1e+10	67.1711	2.1e+10	24605.9	1.2e+06	3.8e+09	51.519	70.0034	0.52358	8.5e+09	68.7	0.868732	32.5787	0.540284	1050.54	1	3	10.8365	2.14376	5.2934	19.4643	0.098573	0.199596	1.8236	1.98996	0.916404
46	CYP	Cyprus	塞浦路斯	2017	D01T02	2.7	2.3	0.4	0.900128	0.450047	1	.	1	.	.	.	.	.	6.09107	26697	130.793	1.84809	1.4e+10	2.3e+10	75.9408	2.3e+10	26444.1	1.2e+06	4.8e+09	55.079	69.748	0.54998	1.2e+10	67.9	0.868425	34.215	0.450047	1196.43	4	8	11.3434	1.85202	4.72477	30.9933	0.080845	0.211588	1.80639	2.00681	0.900128
46	CYP	Cyprus	塞浦路斯	2018	D01T02	2.7	2.4	0.3	0.894251	0.520222	1	.	1	.	.	.	.	.	5.90615	29419.9	131.908	2.03238	-1100000000	2.5e+10	81.3371	2.5e+10	29089.5	1.2e+06	4.9e+09	62.6911	69.4931	0.54783	-6400000000	67.8	0.818842	35.8108	0.520222	1389.43	.	4	12.1691	1.72854	4.2157	41.0549	0.095967	0.203693	1.7942	2.00637	0.894251
47	IND	India	印度	1995	D01T02	1.8	1.4	0.4	1.37804	1.06729	0	.	1	.	.	.	.	.	0.76519	373.628	324.325	1.92046	2.1e+09	3.6e+11	5.53655	3.6e+11	373.766	9.6e+08	9.1e+10	18.135	59.3166	0.59141	2.1e+09	45.1	-0.204163	.	1.06729	.	5021	1545	28.5998	24.4575	3.58313	1.65774	0.027321	0.009674	1.67324	1.21422	1.37804
47	IND	India	印度	1996	D01T02	5.8	3.7	2.1	1.36179	1.0784	0	.	1	.	.	.	.	.	0.787232	399.577	330.716	1.98797	2.4e+09	3.9e+11	6.26905	3.9e+11	399.95	9.8e+08	9.6e+10	18.0829	59.5651	0.63905	2.4e+09	47.4	-0.203833	.	1.0784	152.007	6901	1661	27.9123	25.1993	3.58522	1.54523	0.025308	0.009374	1.66331	1.22141	1.36179
47	IND	India	印度	1997	D01T02	14.9	9.2	5.7	1.36351	1.06936	0	.	1	.	.	.	.	.	0.81736	414.899	337.125	2.09169	3.6e+09	4.2e+11	6.54575	4.2e+11	415.494	1.0e+09	1.1e+11	18.3808	59.8572	0.68669	3.6e+09	49.7	-0.203504	.	1.06936	.	8229	1926	27.837	24.2487	3.13839	1.13624	0.026979	0.010203	1.67756	1.23032	1.36351
47	IND	India	印度	1998	D01T02	7.3	4.6	2.6	1.38582	1.11292	0	.	1	.	.	.	.	.	0.818721	412.509	343.548	1.98819	2.6e+09	4.2e+11	7.53341	4.2e+11	413.299	1.0e+09	1.1e+11	18.1362	60.186	0.70379	2.6e+09	49.7	-0.203174	.	1.11292	115.282	6707	2247	27.303	24.1805	2.46724	0.425308	0.027406	0.009722	1.67586	1.20929	1.38582
47	IND	India	印度	1999	D01T02	5.6	3.9	1.7	1.42603	1.16861	0	.	1	.	.	.	.	.	0.866243	440.961	349.961	2.01883	2.2e+09	4.6e+11	8.52106	4.6e+11	441.999	1.0e+09	1.3e+11	18.0127	60.5397	0.72413	2.2e+09	50.2	-0.180858	.	1.16861	.	2620	2206	26.5193	22.9726	2.50943	0.247357	0.029359	0.011285	1.72975	1.21299	1.42603
47	IND	India	印度	2000	D01T02	12	7.7	4.3	1.42551	1.34613	0	.	1	.	.	.	.	.	0.885078	442.035	356.396	2.02014	3.6e+09	4.7e+11	9.50872	4.7e+11	443.314	1.1e+09	1.2e+11	20.0476	60.9086	0.75699	3.6e+09	47.4	-0.158542	.	1.34613	109.728	6332	2206	27.3258	21.6111	2.82941	3.40562	0.034895	0.014129	1.74507	1.22417	1.42551
47	IND	India	印度	2001	D01T02	11.3	6.7	4.6	1.41622	1.30404	0	.	1	.	.	.	.	.	0.883747	449.911	362.9	2.19469	5.1e+09	4.9e+11	9.6945	4.9e+11	451.573	1.1e+09	1.5e+11	19.313	61.189	0.73591	5.1e+09	49	-0.226784	0.004634	1.30404	.	8213	2379	26.4878	21.6189	2.99103	4.89451	0.034243	0.014229	1.78985	1.26382	1.41622
47	IND	India	印度	2002	D01T02	20.3	9.6	10.7	1.39961	1.27896	0	.	1	.	.	.	.	.	0.897243	468.844	369.406	2.37072	5.2e+09	5.1e+11	10.1764	5.2e+11	470.987	1.1e+09	1.5e+11	20.5398	61.4994	0.72567	5.2e+09	51.2	-0.295026	0.007503	1.27896	.	8772	2693	27.6607	19.5345	4.25873	4.64598	0.038652	0.018467	1.78564	1.27581	1.39961
47	IND	India	印度	2003	D01T02	50.4	23.8	26.6	1.41907	1.24893	0	.	1	.	.	.	.	.	0.905457	543.844	375.83	2.30284	3.7e+09	6.1e+11	10.6254	6.1e+11	546.727	1.1e+09	1.7e+11	21.6424	61.8308	0.71929	3.7e+09	51.2	-0.296112	0.012561	1.24893	.	9188	3425	27.4741	19.592	3.82716	6.10098	0.039944	0.018841	1.81178	1.27674	1.41907
47	IND	India	印度	2004	D01T02	102.7	40.3	62.4	1.46019	1.27543	0	.	1	.	.	.	.	.	0.95547	624.105	382.17	2.04208	5.4e+09	7.1e+11	10.9332	7.1e+11	627.774	1.1e+09	2.2e+11	24.8783	62.1739	0.7569	5.4e+09	51.5	-0.30597	0.020682	1.27543	.	13452	4014	29.2191	17.8147	5.80485	8.06796	0.048936	0.023685	1.91153	1.30909	1.46019
47	IND	India	印度	2005	D01T02	210.7	68.5	142.2	1.43883	1.24814	0	.	1	.	.	.	.	.	0.984262	710.509	388.35	2.02089	7.3e+09	8.2e+11	10.6796	8.2e+11	714.861	1.2e+09	2.7e+11	29.5577	62.5228	0.82411	7.3e+09	54.2	-0.204351	0.116746	1.24814	134.913	19661	4721	29.5338	17.6202	7.55982	10.4602	0.049445	0.027395	1.89793	1.31907	1.43883
47	IND	India	印度	2006	D01T02	585.6	188.4	397.2	1.36636	1.26092	0	.	1	.	.	.	.	.	1.03653	802.014	394.315	2.35206	2.0e+10	9.4e+11	11.4864	9.4e+11	806.753	1.2e+09	3.2e+11	31.9293	62.8084	0.80473	2.0e+10	52.2	-0.183976	0.196183	1.26092	.	23242	5686	30.9272	16.8094	8.02759	14.8543	0.053316	0.039464	1.94701	1.42496	1.36636
47	IND	India	印度	2007	D01T02	740.9	219	521.9	1.39591	1.24526	0	.	1	.	.	.	.	.	1.1236	1022.73	400.14	2.70431	2.5e+10	1.2e+12	13.1267	1.2e+12	1028.33	1.2e+09	4.4e+11	31.1924	63.1026	0.80507	2.5e+10	53.9	-0.197517	0.263093	1.24526	.	28922	6296	30.9032	16.7501	7.7505	16.1896	0.053419	0.037229	1.95452	1.40017	1.39591
47	IND	India	印度	2008	D01T02	859.7	247	612.7	1.3375	1.14096	0	.	1	.	.	.	.	.	1.18036	993.503	405.872	2.526	4.3e+10	1.2e+12	15.0472	1.2e+12	998.522	1.2e+09	4.2e+11	43.0279	63.4092	0.85876	4.3e+10	54.1	-0.217517	0.437544	1.14096	.	30387	6425	31.1367	16.7909	6.43019	18.0649	0.058503	0.050512	1.93438	1.44627	1.3375
47	IND	India	印度	2009	D01T02	455.4	139.7	315.7	1.3541	1.04893	0	.	1	.	.	.	.	.	1.27887	1096.64	411.558	2.72066	3.6e+10	1.3e+12	16.0309	1.3e+12	1101.96	1.2e+09	4.6e+11	31.4565	63.742	0.83314	3.6e+10	54.4	-0.27841	0.633006	1.04893	.	27025	7262	31.1214	16.7443	6.31071	13.5864	0.047972	0.04115	1.92049	1.41827	1.3541
47	IND	India	印度	2010	D01T02	1292.2	407.9	884.3	1.40583	1.13599	0	.	1	.	.	.	.	.	1.33803	1350.63	417.267	2.66772	2.7e+10	1.7e+12	17.8339	1.7e+12	1357.56	1.2e+09	5.6e+11	34.4103	64.1082	0.78849	2.7e+10	53.8	-0.282144	0.885852	1.13599	156.22	30909	8853	30.7251	17.0265	7.59241	17.2297	0.054675	0.036589	1.91958	1.36544	1.40583
47	IND	India	印度	2011	D01T02	1865.4	570.5	1294.9	1.39061	1.11702	0	.	1	.	.	.	.	.	1.39688	1449.6	422.987	.	3.6e+10	1.8e+12	22.7646	1.8e+12	1458.1	1.3e+09	6.3e+11	42.0925	64.4294	0.75502	3.7e+10	54.6	-0.309421	1.06162	1.11702	.	33450	8841	30.1617	17.192	3.91432	18.7585	0.0622	0.047431	1.9922	1.43261	1.39061
47	IND	India	印度	2012	D01T02	2215.6	668.4	1547.2	1.35708	1.16832	0	.	1	.	.	.	.	.	1.4982	1434.02	428.66	.	2.4e+10	1.8e+12	24.268	1.8e+12	1443.88	1.3e+09	6.1e+11	43.0349	64.8055	0.74399	2.4e+10	54.6	-0.353131	1.17555	1.16832	.	34402	9553	29.3985	16.8454	3.44327	18.7789	0.059038	0.05003	1.96183	1.44563	1.35708
47	IND	India	印度	2013	D01T02	1490.5	408.4	1082.1	1.35517	0.942265	0	.	1	.	.	.	.	.	1.52767	1438.06	434.258	.	2.8e+10	1.9e+12	23.7948	1.9e+12	1449.61	1.3e+09	5.8e+11	42.0227	65.2085	0.70642	2.8e+10	55.2	-0.335554	1.15617	0.942265	.	32362	10669	28.4049	17.1484	3.08062	20.6669	0.058223	0.053829	1.94063	1.43202	1.35517
47	IND	India	印度	2014	D01T02	1179.4	315.7	863.6	1.35458	0.880202	0	.	1	.	.	.	.	.	1.64247	1559.86	439.678	.	3.5e+10	2.0e+12	25.4321	2.0e+12	1573.89	1.3e+09	6.1e+11	38.5265	65.596	0.70159	3.5e+10	55.7	-0.288216	1.20482	0.880202	.	30814	12040	27.6564	16.7919	3.16344	19.6341	0.045878	0.041959	1.91419	1.41313	1.35458
47	IND	India	印度	2015	D01T02	668.5	160.1	508.4	1.37261	0.65626	0	.	1	.	.	.	.	.	1.63132	1590.17	444.932	.	4.4e+10	2.1e+12	26.769	2.1e+12	1605.61	1.3e+09	6.0e+11	31.4739	65.9442	0.6931	4.4e+10	54.6	-0.203514	1.28076	0.65626	216.001	33079	12579	27.3474	16.1745	3.37742	11.8719	0.040069	0.034408	1.90442	1.38744	1.37261
47	IND	India	印度	2016	D01T02	451.4	126.6	324.8	1.36074	0.648533	0	.	1	.	.	.	.	.	1.63991	1714.28	450.236	.	4.4e+10	2.3e+12	26.8292	2.3e+12	1732.55	1.3e+09	6.5e+11	27.2874	66.2743	0.66984	4.5e+10	56.2	-0.176018	1.39346	0.648533	.	31858	13199	26.619	16.3638	3.15923	10.6422	0.03714	0.034074	1.88189	1.38299	1.36074
47	IND	India	印度	2017	D01T02	539.6	149.7	389.9	1.34627	0.628458	0	.	1	.	.	.	.	.	1.71349	1957.97	455.469	.	4.0e+10	2.7e+12	27.4421	2.7e+12	1980.67	1.3e+09	7.5e+11	28.2547	66.5382	0.66571	4.0e+10	52.6	-0.129723	1.31857	0.628458	.	31621	14961	26.5	16.5583	4.00965	12.1859	0.036405	0.038005	1.87732	1.39446	1.34627
47	IND	India	印度	2018	D01T02	874.5	213.9	660.6	1.33823	0.64901	0	.	1	.	.	.	.	.	1.79103	1974.38	460.449	.	4.2e+10	2.7e+12	28.0606	2.7e+12	1996.91	1.4e+09	7.9e+11	31.0702	66.7667	0.65282	4.2e+10	54.5	-0.106395	1.32724	0.64901	252.704	33766	16289	26.4121	16.0316	3.5337	15.0675	0.037928	0.04144	1.86246	1.39174	1.33823
48	IDN	Indonesia	印度尼西亚	1995	D01T02	33.3	18.8	14.4	1.37688	1.40638	0	.	1	.	.	.	.	.	1.12889	1020.15	109.375	0.538017	4.3e+09	2.0e+11	11.3338	2.0e+11	1026.39	2.0e+08	5.8e+10	42.5697	62.1826	0.16834	4.4e+09	54.9	-0.568817	.	1.40638	.	2813	61	41.8008	17.1383	5.96814	25.3386	0.075519	0.047253	1.74781	1.26939	1.37688
48	IDN	Indonesia	印度尼西亚	1996	D01T02	46.4	27.1	19.2	1.4543	1.22973	0	.	1	.	.	.	.	.	1.17551	1129.09	111.16	0.560519	6.2e+09	2.3e+11	11.5427	2.3e+11	1137.41	2.0e+08	6.7e+10	40.7895	62.6338	0.14821	6.2e+09	61	-0.693675	.	1.22973	.	3957	40	43.4558	16.6724	5.69074	25.817	0.072247	0.040799	1.84781	1.27058	1.4543
48	IDN	Indonesia	印度尼西亚	1997	D01T02	40.4	24.7	15.7	1.46046	1.11901	0	.	1	.	.	.	.	.	1.27625	1054.35	112.956	0.40872	4.7e+09	2.2e+11	13.3834	2.2e+11	1063.71	2.0e+08	6.1e+10	49.8737	63.1369	0.12808	4.7e+09	62	-0.818534	.	1.11901	.	3939	79	44.329	16.0921	4.73676	24.6125	0.074044	0.041025	1.86707	1.27841	1.46046
48	IDN	Indonesia	印度尼西亚	1998	D01T02	50	28.1	21.9	1.5109	1.35443	0	.	1	.	.	.	.	.	1.26388	459.192	114.738	0.645176	-240000000	9.5e+10	13.3583	9.6e+10	463.948	2.1e+08	2.4e+10	89.737	63.6652	0.10795	-240000000	63.4	-0.943392	.	1.35443	.	1753	93	45.2278	18.0829	4.36983	19.303	0.146978	0.054371	1.95116	1.29139	1.5109
48	IDN	Indonesia	印度尼西亚	1999	D01T02	64.8	34.2	30.6	1.40084	1.18093	0	.	1	.	.	.	.	.	1.32458	663.523	116.472	0.603097	-1900000000	1.4e+11	14.7473	1.4e+11	671.099	2.1e+08	2.8e+10	60.4023	64.1687	0.08782	-1900000000	61.5	-0.838517	.	1.18093	.	2784	152	43.3601	19.6127	4.66659	22.9951	0.094449	0.043961	1.85771	1.32613	1.40084
48	IDN	Indonesia	印度尼西亚	2000	D01T02	58.4	29.7	28.6	1.4242	1.16999	0	.	1	.	.	.	.	.	1.31098	770.865	114.019	0.697608	-4600000000	1.7e+11	14.8768	1.7e+11	780.19	2.1e+08	3.3e+10	66.051	64.6085	0.06769	-4600000000	55.2	-0.733642	0.001869	1.16999	212.676	3733	157	41.9691	15.6787	4.89922	25.2438	0.101886	0.047935	1.90612	1.33838	1.4242
48	IDN	Indonesia	印度尼西亚	2001	D01T02	91.4	46.1	45.3	1.40559	1.20597	0	.	1	.	.	.	.	.	1.39128	739.004	115.638	0.796936	-3000000000	1.6e+11	14.1836	1.6e+11	748.258	2.1e+08	3.2e+10	59.1442	64.7868	0.04756	-3000000000	52.5	-0.780695	0.006909	1.20597	199.238	3714	212	47.8935	15.9949	5.4454	25.3444	0.097679	0.051936	1.90778	1.35728	1.40559
48	IDN	Indonesia	印度尼西亚	2002	D01T02	75.9	39.3	36.6	1.40985	1.25341	0	.	1	.	.	.	.	.	1.38856	888.901	117.237	0.677335	1.5e+08	2.0e+11	14.8034	2.0e+11	900.178	2.2e+08	3.8e+10	49.8343	64.9313	0.05203	1.5e+08	54.8	-0.827747	0.0174	1.25341	.	3609	234	47.7453	16.3197	5.23511	24.3348	0.083196	0.044727	1.87252	1.32817	1.40985
48	IDN	Indonesia	印度尼西亚	2003	D01T02	91.5	44.7	46.8	1.41574	1.27869	0	.	1	.	.	.	.	.	1.49672	1052.41	118.816	0.639576	-600000000	2.3e+11	16.0132	2.4e+11	1065.65	2.2e+08	4.6e+10	45.2796	65.0566	0.0565	-600000000	55.8	-0.912492	0.027613	1.27869	.	3099	201	43.7496	15.1853	5.69922	25.7293	0.083028	0.044378	1.92124	1.35705	1.41574
48	IDN	Indonesia	印度尼西亚	2004	D01T02	134	54.4	79.6	1.36518	1.41992	0	.	1	.	.	.	.	.	1.51034	1136.76	120.339	0.662289	1.9e+09	2.6e+11	16.5951	2.6e+11	1150.26	2.2e+08	5.8e+10	48.9198	65.1824	0.06097	1.9e+09	52.1	-0.831079	0.037577	1.41992	.	3441	227	44.6276	14.3358	6.41005	25.9297	0.091591	0.067375	1.96627	1.44031	1.36518
48	IDN	Indonesia	印度尼西亚	2005	D01T02	209.8	75.8	133.9	1.26128	1.51909	0	.	1	.	.	.	.	.	1.49537	1249.4	121.866	0.700148	8.3e+09	2.9e+11	17.2263	2.9e+11	1263.29	2.3e+08	6.8e+10	56.9216	65.318	0.06544	8.3e+09	52.9	-0.741398	0.047289	1.51909	.	4069	235	46.5411	13.1266	8.4459	27.6871	0.09276	0.086765	1.95667	1.55134	1.26128
48	IDN	Indonesia	印度尼西亚	2006	D01T02	349.9	119.3	230.5	1.29467	1.67833	0	.	1	.	.	.	.	.	1.57235	1572.8	123.459	0.648572	4.9e+09	3.6e+11	17.2802	3.7e+11	1589.8	2.3e+08	8.8e+10	50.5189	65.6106	0.06991	4.9e+09	51.9	-0.629134	0.083852	1.67833	.	4324	288	46.9436	12.9738	9.91354	27.4003	0.092767	0.081034	2.0577	1.58936	1.29467
48	IDN	Indonesia	印度尼西亚	2007	D01T02	553.5	171.4	382.1	1.34124	2.10909	0	.	1	.	.	.	.	.	1.61781	1840.33	125.09	0.735521	6.9e+09	4.3e+11	17.7949	4.3e+11	1860	2.3e+08	1.1e+11	48.8445	65.8362	0.07438	6.9e+09	53.2	-0.523127	0.331591	2.10909	.	4850	284	46.7991	13.7167	10.6518	25.6005	0.103947	0.070243	2.03251	1.5154	1.34124
48	IDN	Indonesia	印度尼西亚	2008	D01T02	783.9	240.2	543.7	1.40233	1.93542	0	.	1	.	.	.	.	.	1.58083	2144.39	126.729	0.787999	9.3e+09	5.1e+11	20.6682	5.1e+11	2166.85	2.4e+08	1.4e+11	52.3577	66.003	0.07885	9.3e+09	53.2	-0.483783	0.412531	1.93542	.	4747	386	48.0607	14.4817	7.91308	29.0319	0.104548	0.05993	2.00015	1.42631	1.40233
48	IDN	Indonesia	印度尼西亚	2009	D01T02	633.6	197.3	436.3	1.47104	1.84182	0	.	1	.	.	.	.	.	1.62288	2239.1	128.351	0.764662	4.9e+09	5.4e+11	22.9891	5.4e+11	2261.25	2.4e+08	1.7e+11	39.5552	66.1198	0.08332	4.9e+09	53.4	-0.475603	0.77343	1.84182	89.4684	4103	415	47.6521	15.2901	9.09438	28.2773	0.088673	0.04086	2.05428	1.39649	1.47104
48	IDN	Indonesia	印度尼西亚	2010	D01T02	1013.6	316.2	697.4	1.50622	1.89186	0	.	1	.	.	.	.	.	1.70282	3094.44	129.967	0.947815	1.5e+10	7.6e+11	24.0763	7.6e+11	3122.36	2.4e+08	2.3e+11	38.8616	66.2094	0.083665	1.5e+10	55.5	-0.485535	0.934494	1.89186	.	5122	508	42.7759	13.9292	9.79275	29.6394	0.094801	0.039405	2.05156	1.36206	1.50622
48	IDN	Indonesia	印度尼西亚	2011	D01T02	1452.2	438.5	1013.6	1.49056	1.7501	0	.	1	.	.	.	.	.	1.92357	3613.8	131.61	0.800177	2.1e+10	8.9e+11	26.3032	8.9e+11	3643.05	2.5e+08	2.8e+11	42.6591	66.4317	0.08401	2.1e+10	56	-0.447481	1.1074	1.7501	.	5297	533	43.9134	13.5123	7.76118	33.8641	0.104896	0.047875	2.07465	1.39186	1.49056
48	IDN	Indonesia	印度尼西亚	2012	D01T02	1071.3	320.5	750.8	1.44006	1.69672	0	.	1	.	.	.	.	.	1.92431	3668.21	133.273	0.78953	2.1e+10	9.2e+11	30.429	9.2e+11	3694.36	2.5e+08	3.0e+11	41.5879	66.6077	0.084355	2.1e+10	56.4	-0.382132	1.19214	1.69672	.	.	.	43.5937	13.374	6.27516	33.3478	0.09527	0.053923	2.04836	1.42241	1.44006
48	IDN	Indonesia	印度尼西亚	2013	D01T02	1020	275.2	744.7	1.43251	1.63979	0	.	1	.	.	.	.	.	1.76859	3602.89	134.899	0.904905	2.3e+10	9.1e+11	31.0637	9.1e+11	3623.93	2.5e+08	2.9e+11	40.4571	66.77	0.0847	2.3e+10	56.9	-0.336987	1.2839	1.63979	.	6787	663	42.6357	13.3567	7.03095	31.4408	0.091747	0.055029	2.02712	1.41508	1.43251
48	IDN	Indonesia	印度尼西亚	2014	D01T02	802.4	207.1	595.4	1.43081	1.61163	0	.	1	.	.	.	.	.	1.88859	3476.62	136.473	0.83857	2.5e+10	8.9e+11	30.8958	8.9e+11	3491.64	2.6e+08	2.9e+11	39.7919	66.9536	0.13825	2.5e+10	58.5	-0.218622	1.32693	1.61163	.	7321	702	41.9283	13.3368	4.73489	29.0429	0.0932	0.057526	2.03728	1.42386	1.43081
48	IDN	Indonesia	印度尼西亚	2015	D01T02	517.8	129.5	388.3	1.46871	1.63191	0	.	1	.	.	.	.	.	1.88562	3322.58	137.997	.	2.0e+10	8.6e+11	33.2507	8.6e+11	3331.7	2.6e+08	2.8e+11	34.043	67.1656	0.1918	2.0e+10	58.1	-0.294808	1.53729	1.63191	.	8095	1058	40.0479	13.4926	5.47643	23.0428	0.089343	0.048626	2.06387	1.40522	1.46871
48	IDN	Indonesia	印度尼西亚	2016	D01T02	530.2	139.4	390.8	1.48485	1.58522	0	.	1	.	.	.	.	.	1.84269	3558.82	139.466	.	4.5e+09	9.3e+11	35.4374	9.3e+11	3562.82	2.6e+08	3.0e+11	30.0622	67.243	0.24535	4.5e+09	59.4	-0.17751	1.99633	1.58522	178.875	8538	1101	39.3084	13.4787	5.74988	19.289	0.083084	0.04212	2.0484	1.37954	1.48485
48	IDN	Indonesia	印度尼西亚	2017	D01T02	866.6	232.9	633.8	1.45424	1.5333	0	.	1	.	.	.	.	.	1.95586	3839.79	140.877	.	2.1e+10	1.0e+12	36.4444	1.0e+12	3837.58	2.7e+08	3.3e+11	32.0727	67.4032	0.23805	2.1e+10	61.9	-0.172104	2.35008	1.5333	215.19	7032	2271	39.3792	13.1566	5.95372	21.8452	0.086256	0.048515	2.06066	1.417	1.45424
48	IDN	Indonesia	印度尼西亚	2018	D01T02	724.9	207.3	517.6	1.39076	1.58012	0	.	1	.	.	.	.	.	2.16048	3902.66	142.245	.	1.9e+10	1.0e+12	36.311	1.0e+12	3893.86	2.7e+08	3.4e+11	35.396	67.5916	0.22633	1.9e+10	64.2	-0.135259	3.32281	1.58012	215.994	8347	1407	39.7297	12.8085	6.87228	23.31	0.088165	0.061558	2.04889	1.47321	1.39076
50	KAZ	Kazakhstan	哈萨克斯坦	1995	D01T02	110.4	57.6	52.8	0.657469	1.98332	0	.	1	.	.	.	.	.	11.0795	1288.19	5.85852	1.06174	9.6e+08	2.0e+10	35.5881	2.0e+10	1288.19	1.6e+07	4.7e+09	44.4531	63.11	0.43933	9.6e+08	24.9	-0.919583	.	1.98332	.	342	1031	29.9977	12.3294	24.1367	24.9892	0.101736	0.192642	1.48292	2.2555	0.657469
50	KAZ	Kazakhstan	哈萨克斯坦	1996	D01T02	11.2	6.1	5	0.635933	1.95565	0	.	1	.	.	.	.	.	9.84665	1350.31	5.77035	1.07683	1.1e+09	2.1e+10	31.0486	2.1e+10	1350.31	1.6e+07	3.6e+09	48.2616	63.5685	0.36635	1.1e+09	30.5	-0.824243	.	1.95565	.	325	1022	25.5878	12.1522	19.7169	32.943	0.067809	0.154247	1.3374	2.10305	0.635933
50	KAZ	Kazakhstan	哈萨克斯坦	1997	D01T02	16.1	9.2	6.9	0.615949	1.92042	0	.	1	.	.	.	.	.	8.62367	1445.5	5.68004	1.05816	1.3e+09	2.2e+10	28.8713	2.2e+10	1445.5	1.5e+07	3.6e+09	48.7144	64.0934	0.29337	1.3e+09	36.1	-0.728903	.	1.92042	.	303	1171	25.6064	11.4068	22.8687	34.1561	0.057929	0.159852	1.32115	2.14491	0.615949
50	KAZ	Kazakhstan	哈萨克斯坦	1998	D01T02	6.3	3.6	2.7	0.61672	1.94888	0	.	1	.	.	.	.	.	9.01271	1468.67	5.58271	0.987912	1.2e+09	2.2e+10	26.6939	2.2e+10	1468.67	1.5e+07	3.5e+09	43.5866	64.6468	0.22039	1.2e+09	41.7	-0.633563	.	1.94888	.	159	1244	29.3146	8.5658	25.9044	36.7044	0.053998	0.137379	1.28096	2.07705	0.61672
50	KAZ	Kazakhstan	哈萨克斯坦	1999	D01T02	6.3	3.5	2.8	0.639724	2.13024	0	.	1	.	.	.	.	.	8.21572	1130.12	5.52964	1.12953	1.6e+09	1.7e+10	24.5166	1.7e+10	1130.12	1.5e+07	2.7e+09	56.4703	65.1761	0.18383	1.6e+09	47.3	-0.682864	.	2.13024	.	111	1352	32.9667	9.88635	20.794	43.6438	0.083976	0.183575	1.41238	2.2078	0.639724
50	KAZ	Kazakhstan	哈萨克斯坦	2000	D01T02	16.1	8.4	7.7	0.703703	2.37874	0	.	1	.	.	.	.	.	8.07261	1229	5.51307	1.24444	1.4e+09	1.8e+10	31.8121	1.8e+10	1229	1.5e+07	3.2e+09	75.7271	65.6359	0.18104	1.4e+09	50.4	-0.732166	.	2.37874	.	116	1399	37.7758	8.11078	2.2068	50.1238	0.135167	0.224111	1.58208	2.24823	0.703703
50	KAZ	Kazakhstan	哈萨克斯坦	2001	D01T02	10.8	5.8	4.9	0.676198	2.25556	0	.	1	.	.	.	.	.	7.90406	1490.93	5.5037	1.37735	2.8e+09	2.2e+10	36.2089	2.2e+10	1490.93	1.5e+07	5.3e+09	68.0956	66.1526	0.22009	2.8e+09	51.8	-0.748895	.	2.25556	.	99	1607	36.1418	8.72483	20.2424	56.0682	0.099799	0.197032	1.53895	2.27588	0.676198
50	KAZ	Kazakhstan	哈萨克斯坦	2002	D01T02	2.8	1.8	1	0.704349	2.22392	0	.	1	.	.	.	.	.	8.82056	1658.03	5.50393	1.30169	2.6e+09	2.5e+10	40.6056	2.5e+10	1658.03	1.5e+07	5.9e+09	65.975	66.565	0.25509	2.6e+09	52.4	-0.765625	.	2.22392	.	103	1594	35.8109	7.99591	17.7178	58.2968	0.106905	0.190144	1.51491	2.1508	0.704349
50	KAZ	Kazakhstan	哈萨克斯坦	2003	D01T02	10.2	5.4	4.8	0.737491	2.15381	0	.	1	.	.	.	.	.	9.80206	2068.12	5.52247	1.13026	2.5e+09	3.1e+10	45.0024	3.1e+10	2068.12	1.5e+07	7.1e+09	69.197	66.9447	0.25246	2.5e+09	52.3	-0.639442	0.006473	2.15381	.	102	1696	35.0753	7.86221	14.1532	61.221	0.120773	0.180687	1.5542	2.10742	0.737491
50	KAZ	Kazakhstan	哈萨克斯坦	2004	D01T02	13	5.7	7.3	0.725597	1.3687	0	.	1	.	.	.	.	.	10.526	2874.29	5.56098	0.881376	5.6e+09	4.3e+10	49.3991	4.3e+10	2874.29	1.5e+07	1.1e+10	76.1825	67.3603	0.24837	5.6e+09	49.7	-0.71652	0.012866	1.3687	.	111	1756	35.3518	7.12296	15.2291	64.2556	0.080762	0.187381	1.5517	2.13852	0.725597
50	KAZ	Kazakhstan	哈萨克斯坦	2005	D01T02	10.6	4.1	6.5	0.791092	0.768089	0	.	1	.	.	.	.	.	11.1715	3771.28	5.61063	1.18941	2.5e+09	5.7e+10	53.7959	5.7e+10	3771.28	1.5e+07	1.6e+10	79.1301	67.8255	0.28361	2.6e+09	53.9	-0.606743	0.019136	0.768089	.	103	1523	37.628	6.36952	14.0126	70.1188	0.058841	0.182146	1.70174	2.15113	0.791092
50	KAZ	Kazakhstan	哈萨克斯坦	2006	D01T02	24.6	8.8	15.7	0.767056	0.922545	0	.	1	.	.	.	.	.	12.1045	5291.57	5.67029	0.990003	7.6e+09	8.1e+10	58.1926	8.1e+10	5291.58	1.5e+07	2.5e+10	76.4494	68.1345	0.24281	7.6e+09	60.2	-0.629864	0.19276	0.922545	.	124	1433	39.3565	5.49583	15.7779	68.7141	0.059698	0.174798	1.62376	2.11688	0.767056
50	KAZ	Kazakhstan	哈萨克斯坦	2007	D01T02	13.3	4.9	8.4	0.793398	1.14387	0	.	1	.	.	.	.	.	12.8124	6771.42	5.73552	0.964545	1.2e+10	1.0e+11	55.2064	1.1e+11	6771.41	1.5e+07	3.2e+10	76.7869	68.491	0.20884	1.2e+10	59.6	-0.569273	1.68916	1.14387	406.57	194	1633	37.7309	5.66029	15.0923	66.0105	0.079051	0.186843	1.67463	2.1107	0.793398
50	KAZ	Kazakhstan	哈萨克斯坦	2008	D01T02	9.7	3.6	6.1	0.823938	0.972373	0	.	1	.	.	.	.	.	15.3411	8458.02	5.84396	0.594107	1.7e+10	1.3e+11	52.2203	1.3e+11	8458.02	1.6e+07	3.6e+10	81.7294	68.8361	0.21654	1.7e+10	61.1	-0.512133	2.08255	0.972373	376.494	189	1483	40.2502	5.3158	12.2115	68.7221	0.082793	0.18426	1.69533	2.0576	0.823938
50	KAZ	Kazakhstan	哈萨克斯坦	2009	D01T02	10.7	4.5	6.2	0.740331	0.568162	0	.	1	.	.	.	.	.	13.2739	7165.22	5.96097	0.614377	1.4e+10	1.2e+11	49.2341	1.2e+11	7165.22	1.6e+07	3.2e+10	62.0985	69.074	0.22924	1.4e+10	60.1	-0.431274	3.51988	0.568162	348.625	314	1513	38.4315	6.14688	11.703	69.5142	0.042806	0.139433	1.46483	1.97861	0.740331
50	KAZ	Kazakhstan	哈萨克斯坦	2010	D01T02	33.6	10.3	23.3	0.870242	0.639019	0	.	1	.	.	.	.	.	14.0731	9070.49	6.04581	0.693135	7.5e+09	1.5e+11	46.248	1.5e+11	9070.49	1.6e+07	3.6e+10	61.5195	69.1341	0.15341	7.5e+09	61	-0.49819	5.22978	0.639019	370.533	273	1691	40.6024	4.51053	11.5473	71.6806	0.055069	0.127438	1.62047	1.86209	0.870242
50	KAZ	Kazakhstan	哈萨克斯坦	2011	D01T02	35.5	11.3	24.3	0.950443	0.459985	0	.	1	.	.	.	.	.	14.8245	11634	6.13298	0.655564	1.4e+10	1.9e+11	48.7026	1.9e+11	11634	1.7e+07	4.1e+10	62.9415	68.7776	0.15349	1.4e+10	62.1	-0.613255	7.07623	0.459985	385.915	317	1415	37.2661	4.98897	13.1837	72.0211	0.050657	0.098331	1.59534	1.67852	0.950443
50	KAZ	Kazakhstan	哈萨克斯坦	2012	D01T02	95.2	29.7	65.6	0.953265	0.724827	0	.	1	.	.	.	.	.	14.5662	12386.7	6.21998	0.654035	1.4e+10	2.1e+11	51.6095	2.1e+11	12386.7	1.7e+07	4.7e+10	63.85	68.336	0.16525	1.4e+10	63.6	-0.667375	9.57325	0.724827	612.183	.	.	36.3029	4.28833	13.1925	69.8793	0.067441	0.103341	1.56018	1.63667	0.953265
50	KAZ	Kazakhstan	哈萨克斯坦	2013	D01T02	121.5	33.4	88.2	1.05421	0.826234	0	.	1	.	.	.	.	.	15.263	13890.6	6.31016	0.520313	1.0e+10	2.4e+11	50.4426	2.4e+11	13890.6	1.7e+07	5.2e+10	56.4186	67.8054	0.17132	1.0e+10	63	-0.694224	11.2928	0.826234	737.22	378	1824	33.6988	4.50355	10.2213	76.2957	0.076303	0.077649	1.6509	1.56602	1.05421
50	KAZ	Kazakhstan	哈萨克斯坦	2014	D01T02	298	69.2	228.7	1.05714	0.862641	0	.	1	.	.	.	.	.	12.1023	12807.3	6.40378	0.608888	7.3e+09	2.2e+11	48.8043	2.2e+11	12807.3	1.7e+07	4.8e+10	54.5382	67.1999	0.16722	7.3e+09	63.7	-0.478445	12.2099	0.862641	798.665	271	1742	33.2094	4.32955	8.96796	76.3926	0.084389	0.080826	1.65741	1.56782	1.05714
50	KAZ	Kazakhstan	哈萨克斯坦	2015	D01T02	167.5	40.8	126.7	0.962677	0.627237	0	.	1	.	.	.	.	.	10.8721	10510.8	6.49806	.	6.6e+09	1.8e+11	46.3735	1.8e+11	10510.8	1.8e+07	4.2e+10	41.5015	66.543	0.16951	6.6e+09	63.3	-0.432839	12.9009	0.627237	777.145	232	1271	30.8548	4.71055	12.7084	67.7182	0.047524	0.073408	1.45208	1.50838	0.962677
50	KAZ	Kazakhstan	哈萨克斯坦	2016	D01T02	138.9	37.1	101.9	0.922729	0.738634	0	.	1	.	.	.	.	.	11.3607	7714.84	6.59112	.	1.7e+10	1.4e+11	46.6161	1.4e+11	7714.84	1.8e+07	3.1e+10	44.9306	65.7741	0.14179	1.7e+10	63.6	-0.436274	12.9983	0.738634	693.683	231	993	31.9798	4.556	15.5906	60.7329	0.056377	0.099584	1.48411	1.60839	0.922729
50	KAZ	Kazakhstan	哈萨克斯坦	2017	D01T02	207.2	56.3	150.9	0.915277	1.03708	0	.	1	.	.	.	.	.	11.8963	9247.58	6.6814	.	4.8e+09	1.7e+11	50.1462	1.7e+11	9247.58	1.8e+07	3.6e+10	46.5032	64.9483	0.12667	4.7e+09	69	-0.373713	14.0657	1.03708	666.15	173	1055	32.3252	4.51698	16.1721	63.3269	0.073089	0.098926	1.5086	1.64824	0.915277
50	KAZ	Kazakhstan	哈萨克斯坦	2018	D01T02	251	70.2	180.8	0.929754	1.14547	0	.	1	.	.	.	.	.	11.8516	9812.63	6.76981	.	3.5e+08	1.8e+11	53.9883	1.8e+11	9812.63	1.8e+07	3.8e+10	52.13	64.1476	0.11683	8.3e+07	69.1	-0.323739	13.277	1.14547	666.935	193	789	33.4962	4.39586	12.3482	70.0329	0.092039	0.099443	1.56727	1.68568	0.929754
51	LAO	Lao People’s Democratic Rep.	老挝	1995	D01T02	1.3	0.7	0.6	0.82127	4.50543	0	.	1	.	.	.	.	.	0.136978	357.902	21.3494	.	9.5e+07	1.8e+09	1.66569	1.8e+09	363.88	4.8e+06	2.0e+08	51.0338	52.0305	0.006475	9.5e+07	41.9	-0.674625	.	4.50543	.	.	.	18.7612	42.2262	.	.	0.052009	0.145287	1.44926	1.76466	0.82127
51	LAO	Lao People’s Democratic Rep.	老挝	1996	D01T02	2.6	1.4	1.3	0.809618	4.75919	0	.	1	.	.	.	.	.	0.154931	371.472	21.854	.	1.6e+08	1.9e+09	2.41662	1.9e+09	378.429	5.0e+06	2.0e+08	54.065	52.005	0.01085	1.6e+08	38.5	-0.70158	.	4.75919	.	.	.	20.6121	40.4983	.	.	0.054145	0.154762	1.42662	1.76209	0.809618
51	LAO	Lao People’s Democratic Rep.	老挝	1997	D01T02	0.9	0.4	0.4	0.804596	2.22901	0	.	1	.	.	.	.	.	0.160443	339.19	22.316	.	9.1e+07	1.7e+09	2.58381	1.8e+09	345.922	5.1e+06	2.1e+08	60.9612	52.1233	0.015225	9.1e+07	35.1	-0.728535	.	2.22901	.	.	.	20.6251	51.8527	.	.	0.034413	0.149275	1.41882	1.7634	0.804596
51	LAO	Lao People’s Democratic Rep.	老挝	1998	D01T02	1.6	0.8	0.8	0.832784	3.30771	0	.	1	.	.	.	.	.	0.162453	243.986	22.7336	.	4.6e+07	1.3e+09	2.05009	1.3e+09	248.839	5.1e+06	2.2e+08	72.0994	52.3596	0.0196	4.6e+07	35.2	-0.755491	.	3.30771	.	.	.	22.262	33.9388	.	.	0.065428	0.159923	1.47118	1.76658	0.832784
51	LAO	Lao People’s Democratic Rep.	老挝	1999	D01T02	1.5	0.6	0.9	0.850603	2.66019	0	.	1	.	.	.	.	.	0.164438	272.362	23.1372	.	7.9e+07	1.5e+09	2.354	1.5e+09	277.81	5.2e+06	2.3e+08	57.4795	52.6803	0.023975	7.9e+07	35.2	-0.876486	.	2.66019	.	.	.	22.4698	34.312	.	.	0.050994	0.148413	1.48441	1.74513	0.850603
51	LAO	Lao People’s Democratic Rep.	老挝	2000	D01T02	1.2	0.6	0.6	0.793723	4.37298	0	.	1	.	.	.	.	.	0.166285	318.771	23.5306	.	3.4e+07	1.7e+09	2.69359	1.7e+09	325.187	5.3e+06	2.3e+08	49.9654	53.0707	0.02835	3.4e+07	36.8	-0.997482	.	4.37298	.	.	.	16.4771	33.6303	.	.	0.062136	0.188453	1.42468	1.79493	0.793723
51	LAO	Lao People’s Democratic Rep.	老挝	2001	D01T02	3	1.5	1.4	0.811744	4.0595	0	.	1	.	.	.	.	.	0.180772	320.419	23.9155	.	2.4e+07	1.8e+09	3.1049	1.8e+09	326.942	5.4e+06	2.4e+08	46.9293	53.5756	0.032725	2.4e+07	33.5	-1.02924	.	4.0595	.	.	.	16.9937	32.6832	.	.	0.054076	0.160038	1.4404	1.77446	0.811744
51	LAO	Lao People’s Democratic Rep.	老挝	2002	D01T02	6	3.1	2.9	0.931484	4.1382	0	.	1	.	.	.	.	.	0.197192	313.618	24.2899	.	4.5e+06	1.8e+09	4.16538	1.8e+09	320.061	5.5e+06	5.1e+08	42.5441	54.0971	0.0371	4.5e+06	36.8	-1.06099	.	4.1382	15.8376	.	.	18.3827	33.3863	.	.	0.054117	0.121851	1.6055	1.72359	0.931484
51	LAO	Lao People’s Democratic Rep.	老挝	2003	D01T02	5	2.3	2.7	0.954872	3.93465	0	.	1	.	.	.	.	.	0.202395	355.651	24.6493	.	1.9e+07	2.0e+09	4.94856	2.0e+09	362.821	5.6e+06	5.6e+08	39.3906	54.6663	0.041475	1.9e+07	41	-1.31075	0.000439	3.93465	.	.	.	20.1201	32.0861	.	.	0.047636	0.0971	1.63271	1.70987	0.954872
51	LAO	Lao People’s Democratic Rep.	老挝	2004	D01T02	2.8	1.1	1.7	0.959001	3.47636	0	.	1	.	.	.	.	.	0.209982	410.251	24.9921	.	1.7e+07	2.4e+09	5.75717	2.4e+09	417.929	5.7e+06	7.5e+08	45.4699	55.3132	0.04585	1.7e+07	42	-1.13481	0.000867	3.47636	.	11	.	19.3595	30.5213	.	.	0.041015	0.102075	1.63209	1.70186	0.959001
51	LAO	Lao People’s Democratic Rep.	老挝	2005	D01T02	6.2	2	4.2	0.958992	3.1258	0	.	1	.	.	.	.	.	0.214811	467.38	25.3595	.	2.8e+07	2.7e+09	7.80413	2.7e+09	475.611	5.8e+06	9.3e+08	52.4573	56.0331	0.050225	2.8e+07	44.4	-1.19391	0.005365	3.1258	.	4	3	23.2288	28.2951	.	.	0.044307	0.115402	1.62291	1.69231	0.958992
51	LAO	Lao People’s Democratic Rep.	老挝	2006	D01T02	40.5	11.1	29.4	0.962981	4.99384	0	.	1	.	.	.	.	.	0.276259	581.01	25.7651	.	1.9e+08	3.5e+09	8.97857	3.5e+09	590.633	5.8e+06	1.0e+09	56.2429	56.8297	0.0546	1.9e+08	47.5	-1.06596	0.012461	4.99384	.	14	5	26.1755	26.7297	.	.	0.090001	0.141178	1.63959	1.70262	0.962981
51	LAO	Lao People’s Democratic Rep.	老挝	2007	D01T02	41.1	11	30.1	0.942004	5.18639	0	.	1	.	.	.	.	.	0.287072	699.041	26.1757	.	3.2e+08	4.2e+09	11.4961	4.2e+09	710.345	5.9e+06	1.4e+09	47.1233	57.6324	0.058975	3.2e+08	50.3	-1.03279	0.018787	5.18639	.	21	2	25.393	25.7881	.	.	0.082437	0.142732	1.59248	1.69052	0.942004
51	LAO	Lao People’s Democratic Rep.	老挝	2008	D01T02	43.1	12.6	30.5	0.898455	4.55017	0	.	1	.	.	.	.	.	0.333808	887.64	26.5852	.	2.3e+08	5.4e+09	13.3074	5.4e+09	900.322	6.0e+06	1.7e+09	45.831	58.4224	0.06335	2.3e+08	50.3	-0.962962	0.047198	4.55017	.	36	1	26.9497	24.1765	.	.	0.076201	0.161682	1.54988	1.72505	0.898455
51	LAO	Lao People’s Democratic Rep.	老挝	2009	D01T02	59.5	18.3	41.2	0.960946	4.91878	0	.	1	.	.	.	.	.	0.407308	936.79	26.9928	.	3.2e+08	5.8e+09	16.3921	5.8e+09	948.654	6.1e+06	2.0e+09	43.1002	59.1771	0.067725	3.2e+08	50.4	-1.02818	0.069295	4.91878	.	18	.	25.1631	24.2054	.	.	0.080897	0.142828	1.66624	1.73396	0.960946
51	LAO	Lao People’s Democratic Rep.	老挝	2010	D01T02	118.7	37.5	81.2	0.931154	6.07114	0	.	1	.	.	.	.	.	0.454991	1127.84	27.3978	.	2.8e+08	7.1e+09	16.6483	7.1e+09	1140.6	6.2e+06	2.0e+09	53.3966	59.8881	0.0721	2.8e+08	51.1	-1.00132	0.093067	6.07114	.	20	.	30.466	22.5958	50.2169	0.870341	0.096851	0.148275	1.65583	1.77826	0.931154
51	LAO	Lao People’s Democratic Rep.	老挝	2011	D01T02	66.9	20.3	46.6	1.12565	3.22506	0	.	1	.	.	.	.	.	0.474259	1363.73	27.8004	.	3.0e+08	8.7e+09	17.8054	8.8e+09	1378.36	6.3e+06	2.5e+09	52.5074	60.5015	0.076475	3.0e+08	51.3	-0.954284	0.102021	3.22506	.	43	.	30.816	20.7913	62.5004	0.770085	0.107602	0.108188	1.94654	1.72926	1.12565
51	LAO	Lao People’s Democratic Rep.	老挝	2012	D01T02	106.7	31.7	75	1.05779	4.33758	0	.	1	.	.	.	.	.	0.502688	1566.01	28.2011	.	6.2e+08	1.0e+10	17.6679	1.0e+10	1581.4	6.4e+06	3.3e+09	52.26	61.1083	0.08085	6.2e+08	50	-0.856417	0.116427	4.33758	.	53	.	32.4366	18.5485	56.44	0.673678	0.1197	0.132259	1.8035	1.70497	1.05779
51	LAO	Lao People’s Democratic Rep.	老挝	2013	D01T02	154.2	41	113.2	1.09544	4.17129	0	.	1	.	.	.	.	.	0.630353	1815.44	28.5994	.	6.8e+08	1.2e+10	19.0228	1.2e+10	1825.67	6.5e+06	3.7e+09	44.7571	61.6778	0.085225	6.8e+08	50.1	-0.814348	0.136727	4.17129	.	69	1	30.4277	17.9305	57.2548	0.616634	0.12422	0.114372	1.87419	1.7109	1.09544
51	LAO	Lao People’s Democratic Rep.	老挝	2014	D01T02	207.3	50.4	156.9	1.18917	4.34165	0	.	1	.	.	.	.	.	0.649261	1984.51	28.9924	.	8.7e+08	1.3e+10	18.3731	1.3e+10	1998.33	6.6e+06	4.0e+09	52.2517	62.1648	0.0896	8.7e+08	51.2	-0.683311	0.240889	4.34165	.	43	1	28.815	17.8488	46.8833	0.042123	0.15553	0.109152	2.01802	1.697	1.18917
51	LAO	Lao People’s Democratic Rep.	老挝	2015	D01T02	202.8	44.7	158.2	1.21709	5.28204	0	.	1	.	.	.	.	.	1.3077	2125.46	29.4082	.	1.1e+09	1.4e+10	18.165	1.4e+10	2134.71	6.7e+06	4.5e+09	64.8208	62.5515	0.093975	1.1e+09	51.4	-0.706584	0.214367	5.28204	.	61	1	27.6933	17.5878	40.3152	0.176089	0.152223	0.084466	2.05986	1.69245	1.21709
51	LAO	Lao People’s Democratic Rep.	老挝	2016	D01T02	282.9	64.9	218	1.24958	6.13201	0	.	1	.	.	.	.	.	2.27853	2309.05	29.8586	.	9.4e+08	1.6e+10	17.2619	1.6e+10	2308.8	6.8e+06	4.6e+09	60.8452	62.8821	0.09835	9.4e+08	49.8	-0.68305	0.354444	6.13201	.	63	.	28.7595	17.2302	36.9265	0.240807	0.167272	0.074294	2.09634	1.67763	1.24958
51	LAO	Lao People’s Democratic Rep.	老挝	2017	D01T02	370	88.9	281.1	1.27528	6.52076	0	.	1	.	.	.	.	.	2.72288	2439.46	30.3203	.	1.7e+09	1.7e+10	15.7409	1.7e+10	2423.85	7.0e+06	4.6e+09	62.5405	63.1255	0.102725	1.7e+09	54	-0.712724	0.38893	6.52076	.	97	3	30.9125	16.1998	24.5288	26.3264	0.183634	0.071509	2.14027	1.67828	1.27528
51	LAO	Lao People’s Democratic Rep.	老挝	2018	D01T02	317.5	78.1	239.4	1.24086	6.03668	0	.	1	.	.	.	.	.	2.72453	2553.36	30.7843	.	1.4e+09	1.8e+10	14.9668	1.8e+10	2542.49	7.1e+06	4.7e+09	65.2954	63.3209	0.1071	1.4e+09	53.6	-0.769035	0.638691	6.03668	.	58	1	31.5332	15.7092	26.3497	24.252	0.166345	0.080876	2.09198	1.68591	1.24086
52	MYS	Malaysia	马来西亚	1995	D01T02	128.4	62.6	65.8	1.37277	1.22481	0	.	1	.	.	.	.	.	4.28616	4405.12	61.2902	1.33639	4.2e+09	8.9e+10	10.9744	8.9e+10	4329.71	2.0e+07	3.9e+10	170.91	60.6091	0.12573	4.2e+09	71.9	0.517325	.	1.22481	.	3911	141	41.4019	12.9494	1.34621	6.99099	0.307337	0.188269	3.00938	2.1922	1.37277
52	MYS	Malaysia	马来西亚	1996	D01T02	165	81.9	83.1	1.42396	1.19475	0	.	1	.	.	.	.	.	4.76796	4874.82	62.9708	0.996276	5.1e+09	1.0e+11	14.5308	1.0e+11	4798.61	2.1e+07	4.3e+10	155.416	60.9786	0.21645	5.1e+09	69.9	0.435984	.	1.19475	90.1149	5354	221	43.5282	11.6804	1.22259	8.06255	0.316844	0.178123	3.15457	2.21536	1.42396
52	MYS	Malaysia	马来西亚	1997	D01T02	177.3	84.7	92.6	1.41138	1.19656	0	.	1	.	.	.	.	.	4.98914	4706.31	64.6756	0.658994	5.1e+09	1.0e+11	18.0872	1.0e+11	4637.87	2.2e+07	4.3e+10	157.757	61.3702	0.30717	5.1e+09	66.8	0.354644	.	1.19656	.	6272	179	44.5735	11.1013	1.20949	8.12358	0.313701	0.180382	3.11636	2.20802	1.41138
52	MYS	Malaysia	马来西亚	1998	D01T02	199	90.4	108.7	1.36882	1.4118	0	.	1	.	.	.	.	.	4.8456	3308.84	66.3842	0.865095	2.2e+09	7.2e+10	21.6436	7.2e+10	3263.34	2.2e+07	1.9e+10	182.254	61.7906	0.39789	2.2e+09	68.2	0.273304	.	1.4118	154.468	5770	193	43.8758	13.3122	1.19655	6.16331	0.365296	0.19181	2.94302	2.15004	1.36882
52	MYS	Malaysia	马来西亚	1999	D01T02	286.4	124.4	162.1	1.34765	1.52377	0	.	1	.	.	.	.	.	5.11674	3538.36	68.083	1.29586	3.9e+09	7.9e+10	22.6152	7.9e+10	3492.67	2.3e+07	1.7e+10	189.53	62.2444	0.43344	3.9e+09	68.9	0.295271	.	1.52377	.	5624	218	46.459	10.8424	1.15091	6.79583	0.368744	0.200091	2.87181	2.13098	1.34765
52	MYS	Malaysia	马来西亚	2000	D01T02	356.1	130.5	225.6	1.44003	1.63732	0	.	1	.	.	.	.	.	5.4197	4087.56	69.8376	1.08294	3.8e+09	9.4e+10	25.6157	9.4e+10	4043.66	2.3e+07	2.4e+10	192.123	62.7287	0.46899	3.8e+09	66	0.317238	.	1.63732	276.909	6021	206	48.3206	8.59902	1.0399	9.61838	0.396133	0.197036	3.09057	2.14618	1.44003
52	MYS	Malaysia	马来西亚	2001	D01T02	300.1	111.1	189	1.51335	1.47023	0	.	1	.	.	.	.	.	5.49893	3941.12	71.6558	1.09185	5.5e+08	9.3e+10	24.9967	9.3e+10	3913.43	2.4e+07	2.3e+10	174.29	63.0474	0.560765	5.5e+08	60.2	0.354453	0.016991	1.47023	.	5663	271	46.2027	8.01097	1.02359	9.71984	0.348675	0.162536	3.03867	2.00791	1.51335
52	MYS	Malaysia	马来西亚	2002	D01T02	417.7	171.6	246.1	1.47132	1.51559	0	.	1	.	.	.	.	.	5.64889	4177.1	73.4818	0.80475	3.2e+09	1.0e+11	27.4433	1.0e+11	4165.73	2.4e+07	2.4e+10	172.365	63.4892	0.65254	3.2e+09	60.1	0.391667	0.07995	1.51559	295.662	4615	322	45.1154	8.98508	0.934103	8.39066	0.341284	0.165152	2.92026	1.98479	1.47132
52	MYS	Malaysia	马来西亚	2003	D01T02	502.7	196.1	306.6	1.50423	1.45529	0	.	1	.	.	.	.	.	5.84043	4454.53	75.2988	0.722048	3.2e+09	1.1e+11	30.6067	1.1e+11	4461.85	2.5e+07	2.5e+10	170.6	64.0265	0.62622	3.2e+09	61.1	0.447343	0.44626	1.45529	.	4686	376	46.5787	9.30609	0.871143	10.0751	0.350649	0.162989	3.01615	2.00511	1.50423
52	MYS	Malaysia	马来西亚	2004	D01T02	617.5	212.5	405	1.50405	1.46122	0	.	1	.	.	.	.	.	6.2476	4924.34	77.1062	0.776961	4.4e+09	1.2e+11	30.0345	1.3e+11	4952.21	2.5e+07	2.6e+10	185.822	64.5952	0.5999	4.4e+09	59.9	0.421242	0.996714	1.46122	502.944	4920	522	48.5303	9.271	1.1096	11.599	0.36557	0.176649	2.9804	1.98158	1.50405
52	MYS	Malaysia	马来西亚	2005	D01T02	741.5	221	520.5	1.55789	1.38709	0	.	1	.	.	.	.	.	6.4582	5536.84	78.9029	0.663562	3.9e+09	1.4e+11	27.9188	1.4e+11	5587.02	2.6e+07	3.2e+10	178.32	65.132	0.60548	3.9e+09	61.9	0.47411	1.86356	1.38709	.	5764	522	46.3683	8.26229	1.12341	13.406	0.36841	0.174376	3.13362	2.01145	1.55789
52	MYS	Malaysia	马来西亚	2006	D01T02	862.2	242.4	619.8	1.56692	1.39545	0	.	1	.	.	.	.	.	6.56751	6137.15	80.6861	0.789342	7.7e+09	1.6e+11	28.4082	1.6e+11	6209.13	2.6e+07	3.6e+10	178.983	65.4378	0.61106	7.7e+09	61.6	0.377344	2.83296	1.39545	369.984	4269	531	46.5157	8.60998	1.33414	13.7316	0.378338	0.178268	3.08583	1.96936	1.56692
52	MYS	Malaysia	马来西亚	2007	D01T02	1028.5	283.6	744.9	1.59838	1.17595	0	.	1	.	.	.	.	.	7.01072	7144	82.4611	0.706818	9.1e+09	1.9e+11	30.0051	1.9e+11	7243.46	2.7e+07	4.3e+10	166.437	65.768	0.699765	9.1e+09	63.8	0.34085	3.82097	1.17595	.	1702	670	44.596	9.98677	1.58483	14.3947	0.366346	0.172862	3.15736	1.97535	1.59838
52	MYS	Malaysia	马来西亚	2008	D01T02	994.8	298.8	696	1.5242	0.974412	0	.	1	.	.	.	.	.	7.33456	8343.3	84.2012	0.805482	7.6e+09	2.3e+11	33.4395	2.3e+11	8474.59	2.7e+07	4.8e+10	154.134	66.1512	0.78847	7.6e+09	63.9	0.211274	4.80511	0.974412	600.107	4485	818	45.1051	9.96858	1.78781	18.3497	0.359059	0.174024	3.04078	1.99501	1.5242
52	MYS	Malaysia	马来西亚	2009	D01T02	581.4	187.1	394.4	1.57231	0.812739	0	.	1	.	.	.	.	.	6.44744	7167.88	85.884	0.739098	1.1e+08	2.0e+11	35.4947	2.0e+11	7292.5	2.8e+07	4.5e+10	138.932	66.6028	1.01001	1.2e+08	64.6	0.190102	5.50586	0.812739	1067.54	4503	1234	40.9678	9.2191	1.533	14.7637	0.320902	0.155013	3.1322	1.9921	1.57231
52	MYS	Malaysia	马来西亚	2010	D01T02	654.5	211.4	443.1	1.58249	0.710659	0	.	1	.	.	.	.	.	6.97203	8880.15	87.4075	0.674424	1.1e+10	2.6e+11	37.0289	2.6e+11	9040.57	2.8e+07	5.7e+10	142.435	67.1007	1.03608	1.1e+10	64.8	0.320044	7.30489	0.710659	1462.47	5152	1231	40.4989	10.0899	1.95008	15.8464	0.294401	0.148246	3.02572	1.912	1.58249
52	MYS	Malaysia	马来西亚	2011	D01T02	790	243.3	546.7	1.62437	0.680387	0	.	1	.	.	.	.	.	6.94693	10209.4	88.8271	0.742472	1.5e+10	3.0e+11	36.1481	3.0e+11	10399.4	2.9e+07	6.6e+10	139.472	67.5869	1.03342	1.5e+10	66.3	0.285657	8.58926	0.680387	1648.88	5376	1076	39.8243	11.4534	2.4774	17.7387	0.2987	0.14477	2.98787	1.8394	1.62437
52	MYS	Malaysia	马来西亚	2012	D01T02	614.9	188	426.9	1.61079	0.653544	0	.	1	.	.	.	.	.	6.93892	10601.5	90.2761	0.905848	8.9e+09	3.1e+11	37.6123	3.1e+11	10817.4	2.9e+07	8.0e+10	134.82	67.991	1.09269	8.9e+09	66.4	0.306877	9.84787	0.653544	1790.69	5826	1114	40.135	9.79375	2.3214	20.4071	0.260227	0.137153	2.89598	1.79787	1.61079
52	MYS	Malaysia	马来西亚	2013	D01T02	603.8	175.1	428.7	1.58648	0.639555	0	.	1	.	.	.	.	.	7.42206	10727.7	91.7206	0.971157	1.1e+10	3.2e+11	39.0746	3.2e+11	10970.1	2.9e+07	8.6e+10	134.321	68.34	1.17772	1.1e+10	66.1	0.35576	9.75218	0.639555	.	6006	1199	39.8854	9.11336	3.2927	22.2724	0.236669	0.132158	2.81263	1.77287	1.58648
52	MYS	Malaysia	马来西亚	2014	D01T02	266.9	102.3	164.5	1.62795	0.394371	0	.	1	.	.	.	.	.	7.73214	11045.6	93.1562	1.18069	1.1e+10	3.4e+11	39.5086	3.4e+11	11319.1	3.0e+07	8.8e+10	130.975	68.6543	1.26275	1.1e+10	69.6	0.476436	10.0012	0.394371	2054.17	6267	1353	39.9244	8.87321	2.8777	22.0895	0.211048	0.111173	2.63717	1.61994	1.62795
52	MYS	Malaysia	马来西亚	2015	D01T02	248.1	90.9	157.2	1.49891	0.43344	0	.	1	.	.	.	.	.	7.61333	9699.58	94.5635	.	9.9e+09	3.0e+11	45.5927	3.0e+11	9955.24	3.0e+07	7.8e+10	124.744	68.9348	1.27945	9.9e+09	70.8	0.384351	9.86133	0.43344	2307.95	6455	1272	38.4497	8.2875	3.92524	16.4637	0.198892	0.134094	2.72511	1.81807	1.49891
52	MYS	Malaysia	马来西亚	2016	D01T02	233.9	87.6	146.3	1.46234	0.435509	0	.	1	.	.	.	.	.	7.48462	9555.65	95.9562	.	1.3e+10	3.0e+11	46.7621	3.0e+11	9817.79	3.1e+07	7.7e+10	118.978	69.0806	1.41517	1.4e+10	71.5	0.315204	8.62388	0.435509	2396.54	6127	1109	37.6833	8.46252	3.85424	14.0026	0.188978	0.136697	2.71436	1.85617	1.46234
52	MYS	Malaysia	马来西亚	2017	D01T02	266.3	93	173.3	1.46262	0.43862	0	.	1	.	.	.	.	.	7.11844	9979.7	97.324	.	9.4e+09	3.2e+11	43.7152	3.2e+11	10259.3	3.1e+07	8.0e+10	129.593	69.2223	1.22802	9.4e+09	73.8	0.277887	8.40573	0.43862	.	5906	1166	38.1147	8.59828	3.94778	15.4037	0.195619	0.142331	2.71198	1.85419	1.46262
52	MYS	Malaysia	马来西亚	2018	D01T02	319.9	103.1	216.9	1.45665	0.440297	0	.	1	.	.	.	.	.	7.5436	11074	98.6129	.	8.3e+09	3.6e+11	45.1254	3.6e+11	11377.7	3.2e+07	8.7e+10	129.645	69.3331	1.04086	8.3e+09	74.5	0.474806	8.32117	0.440297	2184.72	6179	1116	38.2914	7.51209	4.26652	15.6708	0.185271	0.140395	2.70833	1.85928	1.45665
53	MLT	Malta	马耳他	1995	D01T02	0	0	0	0.945574	0.048442	1	.	1	.	.	.	.	.	6.30281	9171.06	1179.43	0	3.9e+08	3.7e+09	21.4881	3.7e+09	9857.48	377419	8.9e+08	129.126	66.5449	0.3311	3.9e+08	56.3	0.945005	.	0.048442	.	13	11	26.3367	2.25884	0.448772	0.000507	0.061742	0.276017	1.92217	2.03281	0.945574
53	MLT	Malta	马耳他	1996	D01T02	0.1	0.1	0	0.952782	0.048067	1	.	1	.	.	.	.	.	6.11811	9438.56	1187.2	0	3.1e+08	3.8e+09	22.6526	3.8e+09	10062.7	379905	9.6e+08	118.549	66.7987	0.31957	3.1e+08	55.8	0.986386	.	0.048067	.	18	6	25.8952	2.25869	0.360591	0.009424	0.061024	0.258435	1.8936	1.98744	0.952782
53	MLT	Malta	马耳他	1997	D01T02	0	0	0	0.963003	0.048546	1	.	1	.	.	.	.	.	6.45156	9724.34	1196.22	0	1.4e+08	3.8e+09	22.4368	3.8e+09	9909.89	382791	8.7e+08	110.534	67.0218	0.30804	1.4e+08	57.9	1.02777	.	0.048546	.	24	22	25.5707	2.22899	0.567106	0.00441	0.061381	0.24879	1.91001	1.98339	0.963003
53	MLT	Malta	马耳他	1998	D01T02	0.1	0.1	0	0.968473	0.083219	1	.	1	.	.	.	.	.	6.16294	10273.5	1204.02	0	3.2e+08	4.0e+09	24.7609	4.0e+09	10409.3	385287	9.7e+08	112.253	67.2357	0.29651	3.2e+08	61.2	1.06915	.	0.083219	.	26	8	26.3164	2.35636	0.590699	0.001342	0.055389	0.231319	1.93025	1.99308	0.968473
53	MLT	Malta	马耳他	1999	D01T02	0.1	0.1	0	0.94095	0.091248	1	.	1	.	.	.	.	.	6.21604	10720.9	1211.18	0	6.7e+08	4.1e+09	23.7319	4.1e+09	10633.6	387578	9.1e+08	116.976	67.4702	0.28498	6.7e+08	59.3	1.1497	.	0.091248	.	72	11	24.8796	2.18596	0.47352	0	0.057522	0.243237	1.90573	2.02533	0.94095
53	MLT	Malta	马耳他	2000	D01T02	0.1	0.1	0	0.962632	0.087008	1	.	1	.	.	.	.	.	5.45827	11083	1219.02	0	7.4e+08	4.1e+09	21.5816	4.1e+09	10432.3	390087	9.2e+08	144.145	67.7417	0.27345	7.4e+08	58.3	1.23024	0.414817	0.087008	.	93	23	26.94	1.872	0.35885	3.1e-07	0.062929	0.249565	1.97367	2.05029	0.962632
53	MLT	Malta	马耳他	2001	D01T02	0.2	0.2	0	0.923548	0.137931	1	.	1	.	.	.	.	.	6.33314	11081	1228.21	0	4.2e+08	4.1e+09	25.3527	4.1e+09	10402.2	393028	8.4e+08	106.473	67.9359	0.26192	4.2e+08	62.9	1.22188	2.277	0.137931	.	107	26	23.8944	2.19691	0.300086	0.002356	0.067222	0.236998	1.80253	1.95175	0.923548
53	MLT	Malta	马耳他	2002	D01T02	0.6	0.6	0	0.896548	0.239212	1	.	1	.	.	.	.	.	5.855	11853.2	1237.4	0.032592	-500000000	4.5e+09	24.7494	4.5e+09	11289.9	395969	7.5e+08	104.553	68.1617	0.25039	-500000000	62.2	1.21351	4.36843	0.239212	682.186	180	22	24.7885	2.13251	0.265966	0.029161	0.086396	0.255798	1.74074	1.9416	0.896548
53	MLT	Malta	马耳他	2003	D01T02	0.6	0.6	0	0.880782	0.205582	1	.	1	.	.	.	.	.	6.5432	13772.2	1245.57	0.037546	9.1e+08	5.4e+09	30.5189	5.5e+09	13669.5	398582	1.2e+09	100.561	68.4081	0.23886	9.1e+08	61.1	1.25713	5.58735	0.205582	688.521	.	.	24.7538	1.96123	0.270557	0.02675	0.076652	0.262306	1.72066	1.95356	0.880782
53	MLT	Malta	马耳他	2004	D01T02	0.2	0.2	0	0.849674	0.158	1	.	1	.	.	.	.	.	6.47448	15243.2	1253.96	0.04896	7.5e+09	6.1e+09	26.8884	6.1e+09	15197.1	401268	1.3e+09	100.982	68.6528	0.49406	7.5e+09	63.3	1.13363	9.20797	0.158	1082.38	471	.	22.3098	1.89598	0.327695	3.20639	0.077113	0.282336	1.71956	2.02379	0.849674
53	MLT	Malta	马耳他	2005	D01T02	0.1	0.1	0	0.80885	0.155951	1	.	1	.	.	.	.	.	6.50366	15866.1	1261.98	0.059604	2.2e+10	6.4e+09	32.3433	6.4e+09	15888.2	403834	1.5e+09	94.7604	68.8736	0.52921	2.2e+10	68.9	1.125	12.5324	0.155951	1183.73	.	.	20.9643	1.84003	0.294108	1.07959	0.067832	0.305937	1.6682	2.06244	0.80885
53	MLT	Malta	马耳他	2006	D01T02	0.1	0.1	0	0.849965	0.150555	1	.	1	.	.	.	.	.	6.53972	16723.9	1266.59	0.077414	2.5e+10	6.8e+09	30.6324	6.8e+09	16723.9	405308	1.5e+09	104.79	69.183	0.58025	2.5e+10	67.3	1.19222	12.8765	0.150555	1282.22	805	.	19.9445	1.86933	0.382929	1.33169	0.089812	0.319103	1.79446	2.11121	0.849965
53	MLT	Malta	马耳他	2007	D01T02	0.1	0.1	0	0.8469	0.145844	1	.	1	.	.	.	.	.	6.67676	19486	1271.01	0.089839	3.6e+10	7.9e+09	33.6028	7.9e+09	19485.9	406724	1.8e+09	103.945	69.4374	0.5485	3.6e+10	66.1	1.2525	20.38	0.145844	1206.32	29	10	18.2633	1.83065	0.488218	2.27499	0.104145	0.339723	1.8949	2.23745	0.8469
53	MLT	Malta	马耳他	2008	D01T02	0.2	0.1	0.1	0.791327	0.105773	1	.	1	.	.	.	.	.	6.65471	22205.3	1279.31	0.108418	1.5e+10	9.1e+09	32.4184	9.1e+09	22205.4	409379	1.8e+09	96.5963	69.5688	0.53331	1.5e+10	66	1.27112	23.7563	0.105773	1321.15	34	14	19.2749	1.06026	0.513446	2.12655	0.11617	0.398686	1.82009	2.30005	0.791327
53	MLT	Malta	马耳他	2009	D01T02	0.2	0.1	0.1	0.851987	0.071562	1	.	1	.	.	.	.	.	6.08495	21083.1	1288.99	0.1196	1.4e+09	8.7e+09	35.5117	8.7e+09	21083.3	412477	1.6e+09	84.3456	69.5322	0.5174	1.5e+09	66.1	1.19938	27.354	0.071562	1200.33	21	8	17.5411	1.43939	0.515917	1.53748	0.095095	0.333231	1.78855	2.09927	0.851987
53	MLT	Malta	马耳他	2010	D01T02	0.3	0.2	0.1	0.905598	0.070509	1	.	1	.	.	.	.	.	6.24017	21798.9	1295.34	0.476909	9.2e+09	9.0e+09	37.3858	9.0e+09	21799.2	414508	1.9e+09	95.7068	69.3171	0.60667	9.3e+09	67.2	1.20855	30.0627	0.070509	1417.01	7	12	17.5651	1.26618	0.477893	25.5754	0.106189	0.318015	1.88232	2.07854	0.905598
53	MLT	Malta	马耳他	2011	D01T02	0.2	0.1	0	0.919253	0.056342	1	.	1	.	.	.	.	.	6.18135	23155.1	1300.84	0.66022	7.8e+09	9.6e+09	39.9993	9.6e+09	23155.6	416268	1.8e+09	110.79	68.9907	0.6737	7.8e+09	65.7	1.13257	30.3793	0.056342	1785.91	6	9	16.3374	0.992115	0.434536	42.4802	0.105444	0.324952	1.9259	2.09507	0.919253
53	MLT	Malta	马耳他	2012	D01T02	0.5	0.3	0.2	0.888986	0.094891	1	.	1	.	.	.	.	.	6.46528	22526.7	1312.59	0.820659	3.3e+09	9.5e+09	42.4792	9.5e+09	22527.6	420028	1.7e+09	114.645	68.5723	0.82675	3.3e+09	67	1.18243	31.5785	0.094891	1986.68	6	11	14.9243	1.05506	0.374506	45.078	0.124839	0.344152	1.91185	2.15059	0.888986
53	MLT	Malta	马耳他	2013	D01T02	0.6	0.4	0.3	0.894144	0.111786	1	.	1	.	.	.	.	.	5.56733	24769.4	1331.15	1.00155	5.1e+08	1.1e+10	43.8914	1.1e+10	24771.1	425967	1.7e+09	92.6774	68.0655	0.77248	5.1e+08	67.5	1.17871	32.6861	0.111786	1886.66	4	13	14.5878	1.06995	0.302521	42.442	0.130857	0.329826	1.90066	2.12567	0.894144
53	MLT	Malta	马耳他	2014	D01T02	0.7	0.5	0.2	0.903491	0.08468	1	.	1	.	.	.	.	.	5.42229	26753.3	1357.99	1.46656	1.6e+08	1.2e+10	44.3358	1.2e+10	26754.3	434558	1.9e+09	83.6639	67.5165	0.71161	1.6e+08	66.4	1.07777	33.9478	0.08468	1831.72	8	5	12.9892	1.00445	0.309689	43.0419	0.117365	0.324346	1.92329	2.12873	0.903491
53	MLT	Malta	马耳他	2015	D01T02	0.6	0.6	0.1	0.934418	0.103068	1	.	1	.	.	.	.	.	3.72338	24921.7	1390.79	.	3.6e+09	1.1e+10	47.1226	1.1e+10	24921.6	445053	2.7e+09	77.925	66.981	0.74253	3.6e+09	66.5	1.05367	35.7452	0.103068	1891.32	2	9	12.2941	0.923305	0.340715	38.4493	0.142666	0.311434	1.90717	2.04102	0.934418
53	MLT	Malta	马耳他	2016	D01T02	0.6	0.5	0.1	0.981187	0.097167	1	.	1	.	.	.	.	.	2.96976	25623.9	1422.99	.	2.8e+09	1.2e+10	48.6034	1.2e+10	25741.4	455356	2.8e+09	82.1566	66.413	0.56778	2.8e+09	66.7	1.01805	36.6177	0.097167	2054.59	1	3	12.3422	0.926848	0.243055	25.3682	0.150545	0.286761	1.94088	1.97809	0.981187
53	MLT	Malta	马耳他	2017	D01T02	0.7	0.6	0.1	0.984068	0.103881	1	.	1	.	.	.	.	.	3.25043	28823.3	1462.5	.	3.9e+09	1.3e+10	54.2599	1.3e+10	28250.7	467999	2.9e+09	66.9753	65.8829	0.58424	3.9e+09	67.7	1.09817	37.8142	0.103881	2130.46	7	5	11.7789	0.648198	0.244516	37.7912	0.155625	0.279304	1.9433	1.97476	0.984068
53	MLT	Malta	马耳他	2018	D01T02	0.6	0.6	0.1	0.951458	0.094715	1	.	1	.	.	.	.	.	3.20347	31566.4	1514.47	.	4.5e+09	1.5e+10	59.2518	1.5e+10	30672.3	484630	3.1e+09	67.011	65.3738	0.57246	4.5e+09	68.5	1.05949	39.0233	0.094715	2062.62	15	2	12.0347	0.697028	0.318105	31.001	0.151312	0.291295	1.91715	2.01496	0.951458
54	MAR	Morocco	摩洛哥	1995	D01T02	0.6	0.2	0.3	1.12438	2.50113	0	.	1	.	.	.	.	.	1.08244	1455.95	59.599	0.495656	3.3e+08	3.9e+10	11.5748	3.9e+10	1432.31	2.7e+07	9.4e+09	43.31	58.2218	-0.06	3.4e+08	62.8	-0.211055	.	2.50113	.	292	89	26.3312	13.4926	11.5458	2.20175	0.082014	0.085282	1.78394	1.5866	1.12438
54	MAR	Morocco	摩洛哥	1996	D01T02	0.2	0.2	0	1.13144	2.35825	0	.	1	.	.	.	.	.	1.05502	1585.72	60.4954	1.49992	3.6e+08	4.3e+10	11.7175	4.3e+10	1561.13	2.7e+07	9.4e+09	38.4255	58.6825	0.051137	3.6e+08	64.3	-0.119486	.	2.35825	.	237	90	25.621	18.44	12.6588	1.62677	0.074257	0.077091	1.78802	1.5803	1.13144
54	MAR	Morocco	摩洛哥	1997	D01T02	0.8	0.3	0.5	1.14127	2.39555	0	.	1	.	.	.	.	.	1.09149	1416.9	61.3872	1.50375	1.1e+09	3.9e+10	11.8601	3.9e+10	1396.77	2.8e+07	8.9e+09	42.2935	59.2943	0.162273	1.1e+09	64.7	-0.027917	.	2.39555	.	.	.	27.3224	14.6342	15.0815	1.94386	0.081825	0.079646	1.80197	1.57892	1.14127
54	MAR	Morocco	摩洛哥	1998	D01T02	1.2	0.4	0.8	1.09732	2.55251	0	.	1	.	.	.	.	.	1.10229	1658.47	62.2716	1.39641	3.1e+08	4.2e+10	9.23924	4.2e+10	1472.39	2.8e+07	1.0e+10	41.7235	59.9895	0.27341	3.1e+08	61.1	0.063651	.	2.55251	.	401	97	25.7379	16.1125	10.2637	1.46035	0.07674	0.086061	1.74206	1.58756	1.09732
54	MAR	Morocco	摩洛哥	1999	D01T02	0.8	0.4	0.4	1.16313	2.54067	0	.	1	.	.	.	.	.	1.14273	1627.14	63.1347	0.572061	8.3e+08	4.2e+10	9.6378	4.2e+10	1447.97	2.8e+07	1.1e+10	42.1815	60.6576	0.384547	8.3e+08	63.8	-0.018407	.	2.54067	.	.	.	26.1019	13.8655	9.28112	2.70324	0.083098	0.081818	1.85879	1.59809	1.16313
54	MAR	Morocco	摩洛哥	2000	D01T02	0.8	0.6	0.2	1.15165	2.09377	0	.	1	.	.	.	.	.	1.15136	1492.38	63.9803	0.609149	4.3e+08	3.9e+10	10.176	3.9e+10	1334.94	2.9e+07	1.1e+10	48.8094	61.2421	0.495683	4.3e+08	63.2	-0.100465	.	2.09377	.	.	104	26.9599	11.8773	8.7485	3.657	0.075525	0.099815	1.90816	1.65689	1.15165
54	MAR	Morocco	摩洛哥	2001	D01T02	1.4	1	0.4	1.13456	1.93859	0	.	1	.	.	.	.	.	1.25382	1500.36	64.8221	0.708934	2.8e+09	3.9e+10	10.4261	4.0e+10	1339.29	2.9e+07	1.0e+10	46.0775	61.8456	0.60682	2.8e+09	63.9	-0.152291	.	1.93859	.	.	.	25.4035	13.192	8.4686	4.22421	0.073585	0.097975	1.84024	1.62198	1.13456
54	MAR	Morocco	摩洛哥	2002	D01T02	1.2	0.9	0.4	1.15159	1.93217	0	.	1	.	.	.	.	.	1.27876	1590.49	65.655	0.699135	4.8e+08	4.2e+10	10.4611	4.2e+10	1416.49	2.9e+07	1.1e+10	46.6725	62.3137	0.52586	4.8e+08	59	-0.204118	0.00679	1.93217	.	.	.	25.2302	13.2005	8.16545	3.66191	0.075744	0.093882	1.83809	1.59614	1.15159
54	MAR	Morocco	摩洛哥	2003	D01T02	2	1.4	0.6	1.13819	1.97585	0	.	1	.	.	.	.	.	1.25588	1936.09	66.4604	1.10769	2.3e+09	5.2e+10	10.8743	5.2e+10	1725.46	3.0e+07	1.4e+10	44.2301	62.698	0.63071	2.3e+09	57.8	-0.31626	0.009106	1.97585	.	.	.	25.9972	13.9231	7.0603	2.61514	0.069356	0.085751	1.7632	1.54913	1.13819
54	MAR	Morocco	摩洛哥	2004	D01T02	1.2	0.8	0.5	1.10021	2.11619	0	.	1	.	.	.	.	.	1.36493	2177.8	67.2936	1.01951	8.9e+08	6.0e+10	11.0519	6.0e+10	1952.9	3.0e+07	1.6e+10	46.5351	63.0783	0.623103	8.9e+08	56.7	-0.228315	0.214709	2.11619	.	457	104	26.6149	13.1609	8.19271	4.49351	0.069024	0.096656	1.72454	1.56746	1.10021
54	MAR	Morocco	摩洛哥	2005	D01T02	1.7	1.1	0.6	1.16859	2.36276	0	.	1	.	.	.	.	.	1.43205	2237.58	68.1871	0.627382	1.7e+09	6.2e+10	11.7869	6.2e+10	2018.03	3.0e+07	1.8e+10	51.2968	63.4872	0.615497	1.7e+09	52.2	-0.401031	0.818038	2.36276	.	520	140	26.1539	11.816	8.73466	5.05373	0.085373	0.106731	1.91045	1.63483	1.16859
54	MAR	Morocco	摩洛哥	2006	D01T02	2.2	1.2	1.1	1.13913	2.44882	0	.	1	.	.	.	.	.	1.45939	2433.21	69.0859	0.652367	2.5e+09	6.9e+10	12.4167	6.9e+10	2196.01	3.1e+07	2.0e+10	53.5017	63.8664	0.60789	2.5e+09	51.5	-0.368485	1.27207	2.44882	648.343	732	178	25.1539	13.6025	9.30187	3.76178	0.084166	0.11354	1.87873	1.64927	1.13913
54	MAR	Morocco	摩洛哥	2007	D01T02	2.2	1.4	0.8	1.09562	2.24395	0	.	1	.	.	.	.	.	1.48415	2751.42	69.9813	0.68085	2.8e+09	7.9e+10	11.9727	7.9e+10	2499.26	3.1e+07	2.5e+10	59.9054	64.2888	0.634553	2.8e+09	56.4	-0.372999	1.53178	2.24395	640.618	782	150	24.666	10.8631	10.2574	3.71753	0.083483	0.132001	1.87253	1.70911	1.09562
54	MAR	Morocco	摩洛哥	2008	D01T02	3.8	1.6	2.2	1.04373	1.91434	0	.	1	.	.	.	.	.	1.53733	3180.17	70.8828	0.685662	2.5e+09	9.3e+10	13.1455	9.3e+10	2890.36	3.2e+07	3.2e+10	67.7904	64.7153	0.661215	2.5e+09	55.6	-0.396399	1.56398	1.91434	656.471	834	177	26.7643	11.9591	15.4521	4.18664	0.07788	0.148842	1.8048	1.72918	1.04373
54	MAR	Morocco	摩洛哥	2009	D01T02	4.2	2.1	2.1	1.0711	2.16257	0	.	1	.	.	.	.	.	1.52149	3118.14	71.7967	1.65037	2.0e+09	9.3e+10	13.678	9.3e+10	2866.92	3.2e+07	2.9e+10	50.5235	65.0784	0.687878	2.0e+09	57.7	-0.313302	1.50177	2.16257	.	856	135	24.2382	13.0286	8.36651	3.5816	0.064933	0.107891	1.73026	1.61541	1.0711
54	MAR	Morocco	摩洛哥	2010	D01T02	4.3	2.9	1.3	1.09086	2.16457	0	.	1	.	.	.	.	.	1.59421	3067.85	72.7422	2.07414	1.2e+09	9.3e+10	14.5676	9.3e+10	2839.93	3.2e+07	2.9e+10	57.0198	65.3426	0.71454	1.2e+09	59.2	-0.273888	1.55982	2.16457	719.776	882	152	25.6574	12.9435	11.5599	3.31052	0.074759	0.114055	1.75793	1.61151	1.09086
54	MAR	Morocco	摩洛哥	2011	D01T02	3.7	2.6	1.1	1.06529	2.16929	0	.	1	.	.	.	.	.	1.70019	3302.45	73.7255	1.28587	2.5e+09	1.0e+11	16.375	1.0e+11	3046.95	3.3e+07	3.2e+10	65.0347	65.6035	0.741202	2.5e+09	59.6	-0.33324	1.81566	2.16929	845.407	880	169	26.6121	13.12	13.1677	4.34145	0.080777	0.132082	1.78549	1.67607	1.06529
54	MAR	Morocco	摩洛哥	2012	D01T02	4.6	3.5	1.1	1.07407	1.78974	0	.	1	.	.	.	.	.	1.7413	3164	74.7304	1.08735	2.8e+09	9.8e+10	19.4505	9.8e+10	2912.66	3.3e+07	3.2e+10	67.488	65.7611	0.767865	2.8e+09	60.2	-0.310735	2.07431	1.78974	850.278	843	197	26.4074	12.3296	12.0817	5.7645	0.077512	0.139896	1.84224	1.7152	1.07407
54	MAR	Morocco	摩洛哥	2013	D01T02	6.2	4.7	1.4	1.0666	2.16276	0	.	1	.	.	.	.	.	1.70373	3377.64	75.7417	1.87146	3.4e+09	1.1e+11	22.6413	1.1e+11	3121.68	3.4e+07	3.3e+10	62.8707	65.8338	0.794528	3.4e+09	59.6	-0.326975	2.50311	2.16276	.	828	316	26.1685	13.3896	9.08869	7.21783	0.076397	0.126951	1.76603	1.65575	1.0666
54	MAR	Morocco	摩洛哥	2014	D01T02	7.3	6.6	0.7	1.0579	2.26459	0	.	1	.	.	.	.	.	1.7137	3430.53	76.739	1.61676	3.5e+09	1.1e+11	25.3326	1.1e+11	3171.7	3.4e+07	3.3e+10	63.7738	65.8666	0.82119	3.5e+09	58.3	-0.278048	2.90548	2.26459	1024.35	742	355	25.8133	10.3531	7.83879	5.06512	0.093519	0.137756	1.81763	1.71816	1.0579
54	MAR	Morocco	摩洛哥	2015	D01T02	8.4	7.1	1.3	1.09742	2.61474	0	.	1	.	.	.	.	.	1.74195	3139.23	77.7066	.	3.3e+09	1.0e+11	28.4035	1.0e+11	2875.26	3.5e+07	2.9e+10	59.7293	65.8866	0.847853	3.3e+09	60.1	-0.251979	3.31048	2.61474	.	797	224	25.6227	11.7962	8.16155	1.93131	0.103929	0.115723	1.81145	1.65063	1.09742
54	MAR	Morocco	摩洛哥	2016	D01T02	8.2	7	1.1	1.15283	2.72434	0	.	1	.	.	.	.	.	1.71805	3132.95	78.6629	.	2.2e+09	1.0e+11	31.9866	1.0e+11	2896.72	3.5e+07	3.1e+10	61.9988	65.8188	0.874515	2.2e+09	61.3	-0.261345	3.57404	2.72434	1073.54	1066	237	25.6851	10.322	6.41215	0.851632	0.114961	0.105901	1.86257	1.61565	1.15283
54	MAR	Morocco	摩洛哥	2017	D01T02	8.9	7.8	1.1	1.09388	2.99011	0	.	1	.	.	.	.	.	1.78796	3288.5	79.6059	.	2.7e+09	1.1e+11	33.7847	1.1e+11	3035.45	3.6e+07	3.1e+10	63.6035	65.7941	0.901177	2.7e+09	61.5	-0.294468	3.87526	2.99011	.	2026	198	25.4055	11.1603	7.03659	0.915717	0.117422	0.121536	1.8081	1.65292	1.09388
54	MAR	Morocco	摩洛哥	2018	D01T02	16.3	9.9	6.4	1.10266	3.24349	0	.	1	.	.	.	.	.	1.80819	3492.67	80.5008	.	3.5e+09	1.2e+11	35.9359	1.2e+11	3226.98	3.6e+07	3.4e+10	67.4425	65.7807	0.92784	3.5e+09	61.9	-0.300342	4.30929	3.24349	.	2350	187	25.2414	11.3055	6.17363	1.16507	0.129952	0.12402	1.82428	1.65444	1.10266
55	MMR	Myanmar	缅甸	1995	D01T02	6.7	3	3.8	1.13187	8.73726	0	.	1	.	.	.	.	.	0.161767	113.788	65.6122	0.690668	2.8e+08	.	5.26893	2.0e+10	428.287	4.4e+07	0	0	60.6502	0.11121	2.8e+08	44.8	-1.5058	.	8.73726	.	.	.	.	.	.	.	0.048247	0.052074	2.10406	1.85892	1.13187
55	MMR	Myanmar	缅甸	1996	D01T02	9.8	4.5	5.3	1.14044	8.57477	0	.	1	.	.	.	.	.	0.168333	132.639	66.4433	0.721571	3.1e+08	.	5.79557	1.7e+10	362.578	4.4e+07	0	0	61.1241	0.08553	3.1e+08	45.1	-1.51893	.	8.57477	.	.	.	.	.	.	.	0.040423	0.038855	2.11981	1.85876	1.14044
55	MMR	Myanmar	缅甸	1997	D01T02	5.2	2.5	2.7	1.11907	8.51201	0	.	1	.	.	.	.	.	0.16483	128.106	67.2829	0.722883	3.9e+08	.	6.3222	1.4e+10	296.87	4.5e+07	0	0	61.6032	0.05985	3.9e+08	45.4	-1.53206	.	8.51201	7.30669	.	.	.	.	.	.	0.032211	0.04168	2.0837	1.86199	1.11907
55	MMR	Myanmar	缅甸	1998	D01T02	12.6	6.2	6.4	1.10764	9.16113	0	.	1	.	.	.	.	.	0.177756	103.627	68.1155	0.431629	3.1e+08	.	6.84884	1.1e+10	231.162	4.6e+07	0	4.00736	62.0815	0.03417	3.2e+08	45.7	-1.54519	.	9.16113	7.36661	.	.	.	.	.	.	0.063699	0.080271	2.06047	1.86024	1.10764
55	MMR	Myanmar	缅甸	1999	D01T02	12.4	5.4	7	1.14571	9.5866	0	.	1	.	.	.	.	.	0.193359	125.302	68.9195	0.449898	2.5e+08	7.6e+09	8.21082	7.6e+09	165.453	4.6e+07	0	44.8251	62.5479	0.04406	2.5e+08	46.4	-1.58931	.	9.5866	11.0435	.	.	.	.	.	.	0.082512	0.098075	2.13465	1.86317	1.14571
55	MMR	Myanmar	缅甸	2000	D01T02	19.8	7.6	12.2	1.21343	11.0496	0	.	1	.	.	.	.	.	0.207309	150.408	69.6795	0.809271	2.5e+08	4.7e+09	9.57281	4.7e+09	99.7449	4.7e+07	0	85.6428	62.994	0.11306	2.6e+08	47.9	-1.63343	.	11.0496	.	.	.	.	.	.	.	0.107708	0.074058	2.26466	1.86633	1.21343
55	MMR	Myanmar	缅甸	2001	D01T02	42	17.2	24.7	1.17385	11.0043	0	.	1	.	.	.	.	.	0.181502	135.18	70.4086	0.78738	2.1e+08	4.3e+09	10.9348	4.3e+09	90.5324	4.7e+07	0	121.79	63.2474	0.07144	2.1e+08	46.1	-1.63569	.	11.0043	12.1545	.	.	10.2089	57.1401	.	.	0.118378	0.052108	2.1861	1.86233	1.17385
55	MMR	Myanmar	缅甸	2002	D01T02	54.1	21.9	32.2	1.26777	11.0181	0	.	1	.	.	.	.	.	0.178616	131.467	71.1207	0.961985	1.5e+08	7.6e+09	10.8813	7.6e+09	159.957	4.8e+07	0	69.971	63.4954	0.16216	1.5e+08	45.5	-1.63795	.	11.0181	17.5464	.	.	12.0683	55.5112	.	.	0.112656	0.044876	2.35103	1.85445	1.26777
55	MMR	Myanmar	缅甸	2003	D01T02	54.1	21.6	32.5	1.21643	11.0383	0	.	1	.	.	.	.	.	0.223479	165.259	71.8002	0.899997	2.5e+08	9.0e+09	10.8278	9.0e+09	186.54	4.8e+07	0	50.4136	63.7324	0.153419	2.5e+08	44.9	-1.61037	.	11.0383	.	.	.	13.7307	52.2682	.	.	0.090746	0.035857	2.26809	1.86454	1.21643
55	MMR	Myanmar	缅甸	2004	D01T02	72.3	24.7	47.6	1.28315	11.6295	0	.	1	.	.	.	.	.	0.214413	198.377	72.4472	0.97215	2.1e+08	8.9e+09	10.7744	8.9e+09	182.384	4.9e+07	0	51.1324	63.9599	0.144679	2.1e+08	43.6	-1.73343	.	11.6295	.	.	.	15.3978	49.2932	.	.	0.122443	0.026143	2.32814	1.8144	1.28315
55	MMR	Myanmar	缅甸	2005	D01T02	91	25.1	65.9	1.33058	12.4105	0	.	1	.	.	.	.	.	0.224656	221.866	73.0447	1.05352	2.3e+08	1.1e+10	10.7209	1.1e+10	216.003	4.9e+07	0	53.758	64.1872	0.135938	2.4e+08	40.5	-1.66426	0.000509	12.4105	.	.	.	17.0253	47.3152	.	.	0.146534	0.022027	2.35624	1.77083	1.33058
55	MMR	Myanmar	缅甸	2006	D01T02	157.6	42.1	115.5	1.35593	12.5802	0	.	1	.	.	.	.	.	0.207402	246.692	73.5891	1.33763	2.8e+08	1.5e+10	10.6674	1.5e+10	295.638	4.9e+07	0	48.5548	64.3199	0.127197	2.8e+08	40	-1.6535	0.008237	12.5802	.	.	.	18.5099	45.0862	.	.	0.189579	0.030251	2.48047	1.82935	1.35593
55	MMR	Myanmar	缅甸	2007	D01T02	264.1	71.1	193	1.35187	12.1622	0	.	1	.	.	.	.	.	0.214523	321.828	74.1303	1.37712	7.1e+08	2.5e+10	10.6139	2.5e+10	512.58	5.0e+07	2.0e+09	37.3501	64.4836	0.118457	7.1e+08	41	-1.69983	0.013347	12.1622	.	.	.	19.9177	43.5728	.	.	0.178029	0.027873	2.52647	1.86887	1.35187
55	MMR	Myanmar	缅甸	2008	D01T02	475.1	135.9	339.3	1.27021	11.3487	0	.	1	.	.	.	.	.	0.162083	472.261	74.5886	1.64482	8.6e+08	3.2e+10	11.5062	3.2e+10	637.522	5.0e+07	5.0e+09	34.9908	64.6795	0.109716	8.6e+08	39.5	-1.70055	0.020511	11.3487	.	.	.	21.664	41.628	.	.	0.120231	0.032075	2.51374	1.979	1.27021
55	MMR	Myanmar	缅甸	2009	D01T02	368.7	109.3	259.5	1.31108	10.8398	0	.	1	.	.	.	.	.	0.152891	600.932	75.0281	2.26381	1.1e+09	4.2e+10	12.3985	4.2e+10	840.074	5.0e+07	8.0e+09	26.0814	64.9027	0.100975	1.1e+09	37.7	-1.75164	0.047413	10.8398	.	.	.	23.6678	39.1116	.	.	0.114129	0.02308	2.71413	2.07015	1.31108
55	MMR	Myanmar	缅甸	2010	D01T02	550.7	168.5	382.2	1.2744	10.9161	0	.	1	.	.	.	.	.	0.164631	765.242	75.6069	2.61148	9.0e+08	5.2e+10	13.2908	5.2e+10	1018.13	5.1e+07	1.2e+10	26.0509	65.1485	0.092235	9.0e+08	36.7	-1.73936	0.046466	10.9161	.	.	.	25.5773	37.4305	0.714115	35.1816	0.106732	0.023366	2.7333	2.14478	1.2744
55	MMR	Myanmar	缅甸	2011	D01T02	478.4	141.5	336.9	1.26829	9.66624	0	.	1	.	.	.	.	.	0.174575	1086.84	76.2212	3.52984	2.5e+09	5.4e+10	14.183	5.4e+10	1061.92	5.1e+07	1.6e+10	33.7168	65.5191	0.083494	2.5e+09	37.8	-1.6142	0.043977	9.66624	.	.	.	29.0628	34.5094	0.772259	35.9097	0.079732	0.024868	2.73095	2.15325	1.26829
55	MMR	Myanmar	缅甸	2012	D01T02	518.9	147.6	371.4	1.28134	9.36018	0	.	1	.	.	.	.	.	0.23824	1161.31	76.8861	3.28119	1.3e+09	5.3e+10	13.5342	5.3e+10	1035.8	5.1e+07	1.5e+10	33.9464	65.8896	0.074753	1.3e+09	38.7	-1.38298	.	9.36018	.	.	.	31.8598	31.4948	1.2471	24.3583	0.075032	0.02599	2.77221	2.16354	1.28134
[truncated: 65,262 more rows]
[truncated: 14 more columns]
